# Supplementary material
Source: ML conference proceedings conference paper supplement (https://openreview.net/forum?id=pflsJ6V6CL)
Supplement: supplementary_material [file attachment]

## Sheet: Sheet1
Произношение	Формула
24	$ ^\textrm { \scriptsize 24 } $
40	$ 40 $
41	$ ^\textrm { \scriptsize 41 } $
43	$ 43 $
48	$ 48 $
64	$ 64 $
78	$ 78 $
93	$ ^\textrm { \scriptsize 93 } $
96	$ ^\textrm { \scriptsize 96 } $
98	$ 98 $
101	$ ^\textrm { \scriptsize 101 } $
108	$ ^\textrm { \scriptsize 108 } $
112	$ 112 $
117	$ 117 $
120	$ ^\textrm { \scriptsize 120 } $
125	$ ^\textrm { \scriptsize 125 } $
127	$ ^\textrm { \scriptsize 127 } $
128	$ 128 $
139	$ ^\textrm { \scriptsize 139 } $
150	$ ^\textrm { \scriptsize 150 } $
168	$ ^\textrm { \scriptsize 168 } $
170	$ 170 $
178	$ 178 $
184	$ 184 $
275	$ 275 $
600	$ 600 $
- mu - lambda - omega	$ \mu , \ , \lambda , \ , \omega $
- Widetilde X - Widetilde A - Widetilde R	$ ( \widetilde { X } , \widetilde { A } , \widetilde { R } ) $
-1.01 plus or minus 0.18	$ -1.01\pm0.18 $
( C D, W, F F )	$ ( \CC , \WW , \FF ) $
( f, E, B )	$ ( f , E , B ) $
( k, t, N )	$ ( k , t , N ) $
( Q + alpha V, R + alpha W )	$ ( Q+\alpha V , R + \alpha W ) $
( T, V )	$ ( T , \mathcal V ) $
( t, z ( t ) )	$ ( t , z ( t ) ) $
( zeta, overline zeta )	$ ( \zeta , \overline \zeta ) $
(2) implies (3)	$ ( 2 ) \Rightarrow ( 3 ) $
(4) implies (2)	$ ( 4 ) \implies ( 2 ) $
(A, b) - None	$ ( A , b ) $
(J plus 1)	$ ( J+1 ) $
(k minus one)	$ ( k-1 ) $
(n minus one)	$ ( n-1 ) $
(R, P) : None	$ ( R , P ) $
(V, K) : None	$ ( V , K ) $
(X, Delta) - None	$ ( X , \Delta ) $
(X, f) : None	$ ( X , f ) $
(X, Gamma, alpha) : None	$ ( X , \Gamma , \alpha ) $
\neg	$ \neg A $
|x minus x sub j| is less than or equal to epsilon divided by 2.	$ |x-x_j| \le \epsilon/2 $
$ \mathbb\ { R^d $	$ \mathbb\ { R^d $
$ \mathbb\ R^3 $	$ \ { \mathbb\ R^3 $
$ for some trapezoid $	$ for some trapezoid $
$ z\in\ { \mathbb\ C $	$ z\in\ { \mathbb\ C $
$4.03$	$ 4.03 $
$a$ squared plus $b$ squared plus $c$ squared equals $1$.	$ a^2 + b^2 + c^2 = 1 $
0 is less than alpha which is less than one-half.	$ 0 < \alpha < 1/2 $
0 is less than delta and delta is less than or equal to one-half.	$ 0 < \delta \leq 1/2 $
0 is less than epsilon, much much less than 1.	$ 0 < \epsilon\ll 1 $
0 is less than epsilon, which is less than 1.	$ 0 < \epsilon < 1 $
0 is less than eta which is less than 1 minus 1 over b.	$ 0 < \eta < 1- \frac { 1 } { b } $
0 is less than or equal to i, which is less than or equal to ell.	$ 0\leq i\leq \ell $
0 is less than or equal to t, and t is less than or equal to s.	$ 0\leq t\leq s $
0 is less than t and t is less than or equal to T.	$ 0 < t\leq T $
0 is less than underline p star is less than e of X is less than 1.	$ 0 < \underline { p } ^ * < e ( X ) < 1 $
Zero point zero three eight.	$ 0.038 $
Zero point zero seven	$ 0.07 $
Zero point zero seven eight.	$ 0.078 $
Zero point zero nine eight.	$ 0.098 $
0.1 minus 100, M sub solar mass	$ 0.1-100\ , M_ { \odot } $
0.1 percent.	$ 0.1\ % $
0.1177 times 0.1179, subscript negative 0.00081, superscript positive 0.00085.	$ 0.1177 ( 0.1179 ) _ { -0.00081 } ^ { +0.00085 } $
zero point one two two	$ 0.122 $
Zero point two nine.	$ 0.29 $
0.290 with a lower uncertainty of 0.025 and an upper uncertainty of 0.027.	$ 0.290_ { -0.025 } ^ { +0.027 } $
Zero point two nine two.	$ 0.292 $
0.3 percent.	$ 0.3\ % $
0.3: None	$ 0.3 $
0.305 raised to the power of positive 0.030, subscript negative 0.042.	$ 0.305^ { +0.030 } _ { -0.042 } $
0.34: Zero point three four	$ 0.34 $
0.35: None	$ 0.35 $
0.378: None	$ 0.378 $
0.43: None	$ 0.43 $
0.48: None	$ 0.48 $
0.5 percent.	$ 0.5\ % $
0.5: None	$ 0.5 $
0.50: None	$ 0.50 $
0.576: None	$ 0.576 $
0.6: None	$ 0.6 $
0.602: None	$ 0.602 $
0.63: None	$ 0.63 $
0.65 plus or minus 0.06	$ 0.65 \pm 0.06 $
0.65: None	$ 0.65 $
0.66: None	$ 0.66 $
0.7: None	$ 0.7 $
0.758: Zero point seven five eight.	$ 0.758 $
0.77: None	$ 0.77 $
0.8 degrees	$ \SI { 0.8 } { \degree } $
0.8: None	$ 0.8 $
0.827: None	$ 0.827 $
0.83: None	$ 0.83 $
0.88: None	$ 0.88 $
0.9: None	$ 0.9 $
0.90: None	$ 0.90 $
0.91: None	$ 0.91 $
0.914 plus or minus 0.015	$ 0.914 \pm 0.015 $
0.92 with a lower uncertainty of 0.02 and an upper uncertainty of 0.01.	$ 0.92_ { -0.02 } ^ { +0.01 } $
0.922: None	$ 0.922 $
0.95: None	$ 0.95 $
0.98: None	$ 0.98 $
01, open bracket, 10, close bracket.	$ 01 [ 10 ] $
1 is less than or equal to j, which is less than or equal to k.	$ 1\leq j\leq k $
1 is less than or equal to j, which is less than or equal to N.	$ 1 \leq j \leq N $
1 is less than or equal to l, which is less than or equal to j.	$ 1\leq l\leq j $
1 is less than or equal to t which is less than or equal to T.	$ 1 \leq t \leq T $
1 is less than p and p is less than infinity.	$ 1 < p < \infty $
1.01 raised to the power of plus 0.32, sub minus 0.32.	$ 1.01^ { +0.32 } _ { -0.32 } $
1.1 percent.	$ 1.1\ % $
1.11 times 0.17	$ 1.11 ( 0.17 ) $
1.2 less than n sub t less than 2.5.	$ 1.2 < n_t < 2.5 $
1.2: One point two.	$ 1.2 $
1.20 percent.	$ 1.20\ % $
1.21: One point two one.	$ 1.21 $
1.218 plus or minus 0.003	$ 1.218\pm0.003 $
1.219 plus or minus 0.061	$ \uline { 1.219 } \pm \uline { 0.061 } $
1.24 is a subset of plus 0.07 minus 0.07.	$ 1.24\substack { +0.07\\-0.07 } $
1.31: One point three one	$ 1.31 $
1.32 plus or minus 0.07	$ 1.32\pm0.07 $
1.36: One point three six.	$ 1.36 $
1.45: One point four five.	$ 1.45 $
1.5: One point five.	$ 1.5 $
1.55 times ten to the power of negative five.	$ 1.55 \cdot 10^ { -5 } $
1.681 raised to the power of positive 0.517, subscript negative 0.523.	$ 1.681^ { +0.517 } _ { -0.523 } $
1.7 plus or minus 0.4	$ 1.7\pm0.4 $
1.75: One point seven five	$ 1.75 $
1.84: One point eight four.	$ 1.84 $
1.85 times 10 to the power of negative 8.	$ 1.85 \ 10^ { -8 } $
1.87: None	$ 1.87 $
1.9 plus or minus 0.6	$ 1.9\pm0.6 $
10 h to the power of negative 1	$ 10\mathinner\ { h\^\ { \-1 $
10 percent.	$ 10\ % $
10 sub 124.	$ 10_ { 124 } $
10 to the power of negative 5.	$ 10^ { -5 } $
10 to the power of negative four.	$ 10^ { -4 } $
1064: None	$ 1064 $
108.6: One hundred eight point six.	$ 108.6 $
112 to the power of 112	$ ^ { 112 } $
117.0, sub negative one4.0, superscript positive one4.0.	$ { 117.0 } _ { -14.0 } ^ { +14.0 } $
12.4 is spoken as twelve point four.	$ 12.4 $
12.7: None	$ 12.7 $
1324: None	$ 1324 $
14 point 18.	$ 14.18 $
14.06 plus or minus 0.07	$ 14.06\pm0.07 $
1460 plus or minus 50.	$ 1460 \pm 50 $
15 bar	$ \bar { 15 } $
15 raised to the power of.	$ ^ { 15 } $
15.6: One five point six.	$ 15.6 $
1550: One thousand five hundred fifty.	$ 1550 $
15763.33	$ 15763.33 $
16 percent.	$ 16\ % $
161 superscript plus 19, subscript minus 9.	$ 161^ { +19 } _ { -9 } $
18.54 plus or minus 0.13.	$ 18.54\pm0.13 $
18.7: None	$ 18.7 $
19.26 plus or minus 0.13.	$ 19.26\pm 0.13 $
2 g minus 2 plus n is greater than zero.	$ 2g-2+n > 0 $
2 is less than or equal to k, which is less than or equal to n.	$ 2 \leq k \leq n $
2.	$ I_2 $
2.09: None	$ 2.09 $
2.34 plus or minus 0.13	$ 2.34\pm0.13 $
2.34 with a lower uncertainty of 1.40 and an upper uncertainty of 1.35.	$ 2.34_ { -1.40 } ^ { +1.35 } $
2.4 is less than or equal to B1 which is less than or equal to 3.2.	$ 2.4\leq B_1 \leq 3.2 $
2.43	$ 2.43 $
2.55: None	$ 2.55 $
2.65 percent.	$ 2.65\ % $
2.68: None	$ 2.68 $
2000: Two thousand.	$ 2000 $
24.18: None	$ 24.18 $
256: Two hundred fifty-six.	$ 256 $
27 percent.	$ 27\ % $
270 degrees	$ 270^ { \circ } $
28.0: None	$ 28.0 $
28.2 percent.	$ 28.2\ % $
2t: Two times t.	$ 2t $
3.1 plus or minus 0.3	$ 3.1\pm 0.3 $
3.12 with a lower uncertainty of 0.09 and an upper uncertainty of 0.10.	$ 3.12_ { -0.09 } ^ { +0.10 } $
3.39 percent divided by 14.24 percent divided by 10.87 percent.	$ 3.39\ % /14.24\ % /10.87\ % $
3.4 raised to the power of plus 1.7 subscript minus 1.5.	$ 3.4 ^ { +1.7 } _ { -1.5 } $
3.46 plus or minus 1.24	$ 3.46\pm1.24 $
3.7: None	$ 3.7 $
33 grams.	$ ^\textrm { \scriptsize 33g } $
33.7, subscript negative 5.4, superscript positive 10.6.	$ 33.7_ { -15.4 } ^ { +10.6 } $
361: Three hundred sixty-one.	$ 361 $
37, 2, 840.	$ 372,840 $
37.3: None	$ 37.3 $
37.97: None	$ 37.97 $
38.5	$ 38.5 $
3839 plus or minus 60.	$ 3839\pm60 $
4.35 plus or minus 0.12.	$ 4.35\pm 0.12 $
4.4 plus or minus 2.0	$ 4.4\pm2.0 $
4.424 plus or minus 0.258.	$ 4.424\pm 0.258 $
4.5 percent.	$ 4.5\ % $
4.5: None	$ 4.5 $
4.7: None	$ 4.7 $
40 times h to the power of negative one times Mpc.	$ 40 \ , h^ { -1 } \textrm { Mpc } $
42 raised to the power of 42.	$ ^ { 42 } $
47.6: Forty-seven point six	$ 47.6 $
5.2, 3.9, 4.7 tilde T.	$ ~= 5.2 , 3.9 , 4.7~T/ $
5.3: None	$ 5.3 $
5.4: None	$ 5.4 $
5.8 percent.	$ 5.8\ % $
51 point six six	$ 51.66 $
58.3	$ 58.3 $
59.48 down arrow.	$ 59.48\downarrow $
6.1 plus or minus 0.1.	$ 6.1\pm0.1 $
6.25: None	$ 6.25 $
60 percent.	$ 60\ % $
60.2: None	$ 60.2 $
61 to the power of 61.	$ ^ { 61 } $
62b	$ ^\textrm { \scriptsize 62b } $
63a	$ ^\textrm { \scriptsize 63a } $
64b	$ ^\textrm { \scriptsize 64b } $
66.73: Sixty-six point seven three	$ 66.73 $
67.32 plus or minus 0.52.	$ 67.32\pm 0.52 $
68.1: None	$ 68.1 $
68.5	$ 68.5 $
75.7: Seventy-five point seven.	$ 75.7 $
7bo4bo14b2o	$ 7bo4bo14b2o $
8 eta squared L cubed is less than or equal to 3 eta L squared divided by 2.	$ 8\eta^2 L^3 \le \frac { 3\eta L^2 } { 2 } $
80 percent.	$ 80\ % $
82 percent.	$ 82\ % $
82.1: Eighty-two point one	$ 82.1 $
82.9: Eighty-two point nine	$ 82.9 $
84.8	$ 84.8 $
87.42 sub plus or minus 1.2.	$ 87.42_ { \pm 1.2 } $
89.4	$ \textbf { 89.4 } $
89.4: Eighty-nine point four	$ 89.4 $
89.6: Eighty-nine point six.	$ 89.6 $
9.75 raised to the power of 0.82 sub 0.87.	$ 9.75^ { 0.82 } _ { 0.87 } $
90th	$ 90^\mathrm { th } $
91 point 33	$ 91.33 $
95 point 49	$ 95.49 $
95.72 plus or minus 0.72.	$ ( 95.72\pm0.72 ) $
97.10: Ninety-seven point one zero.	$ 97.10 $
A	$ A $
a	$ \bf a $
A approximately 0.9.	$ A\approx0.9 $
A approximately equals 130	$ A \approx 130 $
A arrow R	$ A\rightarrow\R $
A at t.	$ A_t $
A b m hat theta	$ \A\bm { \hat\theta } $
A bar A belongs to the set S of d.	$ A , \bar { A } \in\mathbb { S } ( d ) $
a bar sub t.	$ \bar { a } _t $
a bar.	$ \bar { a } $
a belongs to A	$ a \in A $
a belongs to A ell	$ a \in A^\ell $
a belongs to A.	$ a\in A $
a belongs to B sub W	$ a \in B_W $
a belongs to the open interval from 0 to 1.	$ a\in ( 0,1 ) $
A belongs to the set containing C and B.	$ A \in \cB $
a belongs to the set containing K.	$ a\in [ K ] $
a belongs to the set of integers from k.	$ a\in [ k ] $
a belongs to the set of real numbers	$ a \in \R $
a belongs to the set of SH star of W	$ a \in { \rm SH } _ * ( W ) $
A belongs to the special linear group of 2 by 2 matrices over the complex numbers.	$ A\in \PSL ( 2 , \C ) $
A calligraphic A.	$ { \cal A } $
A calligraphic capital A.	$ \calA $
A colon B maps to the category C.	$ A : B \to \category { C } $
a comma b.	$ ( a , b ) $
A comma B.	$ ( A , B ) $
A cup kappa not in M.	$ A \cup \kappa \not \in M. $
a d minus b c equals one.	$ ad-bc=1 $
A dagger.	$ A^ { \dagger } $
A degrees.	$ A^\circ $
a divides d sub n	$ a\mid d_n $
A does not equal zero.	$ A\neq 0 $
A double prime subscript one.	$ A '' _1 $
a equals 1, dot dot dot, n.	$ a=1 , \dots , n $
a equals 2	$ a=2 $
a equals 3	$ a=3 $
A equals C to the power of negative one-half.	$ \boldsymbol { A } = \boldsymbol { C } ^ { -1/2 } $
A equals h sub zero of n.	$ A=h_0 ( n ) $
a equals i.	$ a=i $
a equals one	$ a=1 $
a equals one, two, three.	$ a=1,2,3 $
A equals open parenthesis, w sub 2 minus w sub 1, close parenthesis, divided by w sub 2.	$ A= ( w_2-w_1 ) /w_2 $
A equals ten.	$ A=10 $
a equals zero point zero six.	$ a=0.06 $
a equals zero.	$ a=0 $
a goes to b under the influence of e sub b.	$ a \xrightarrow { e_b } ab $
a goes to zero.	$ a\to 0 $
a greater than or equal to b	$ a\ge b $
a implies b	$ a \rightarrow b $
A infinity.	$ A_\infty $
A inverse times e to the power of negative B t times the derivative of f with respect to t of x minus C t.	$ A ^ { -1 } e^ { -B t } f'_t ( x ) -Ct $
A is a subset of G.	$ A \subset G $
A is a subset of the set of natural numbers.	$ A \subseteq [ N ] $
A is a subset of X star.	$ A\subseteq X^ * $
A is a subset of X.	$ A \subseteq X $
A is equal to the space of smooth functions on the dual space of V.	$ \cA=C^\infty ( V^\ast ) $
a is greater than zero.	$ a > 0 $
a is less than negative one.	$ a < -1 $
A is less than or equal to C times B.	$ A\le C B $
a is not equal to zero.	$ a\neq 0 $
A maps from L squared of R to L squared of R.	$ A : L^2 ( \R ) \to L^2 ( \R ) $
a minus 1, times b minus 1.	$ ( a-1 ) ( b-1 ) $
A minus A sub zero.	$ A-A_0 $
A modulo B	$ \AModB $
A odot B: A center dot B	$ A \odot B $
A of A equals A times e to the power of negative beta H divided by Z.	$ \A ( A ) = \frac { Ae^ { -\beta H } } { Z } $
A of Gamma.	$ A ( \Gamma ) $
a of k	$ a ( k ) $
A of T.	$ A ( T ) $
A of tau.	$ A ( \tau ) $
a of x times y plus b of x times the partial derivative with respect to nu of y equals zero.	$ a ( x ) y + b ( x ) \partial_\nu y = 0 $
A one equals A two equals A three equals Identity	$ A_1=A_2=A_3=\Id $
A one.	$ \mathbf { A } _1 $
A plus	$ A^+ $
a plus b plus c plus d equals zero.	$ a+b+c+d=0 $
A plus or minus A	$ A_\pm $
a prime	$ a^ { \prime } $
A prime.	$ A ' $
A raised plus subscript 4.	$ A^+_4 $
A raised to the power of 1.	$ A^1 $
a raised to the power of a.	$ ^ { a } $
A raised to the power of i.	$ A^i $
A raised to the power of in.	$ A^ { ( in ) } $
a raised to the power of Lagrangian, sub max, JB	$ a^ { \rm Lar } _ { \rm max , JB } $
A S sub B of d	$ \AS_B ( d ) $
a single image.	$ to a single image $
A square cup B equals B sub r of x	$ A \sqcup B = B_r ( x ) $
a squared sub i i of X	$ a^2_ { ii } ( X ) $
A star.	$ A^ * $
a sub 0	$ n , \delta , g_0 , \beta , a_0 $
a sub 0 is a subset or equal to with a left-to-right arrow on top b sub 0.	$ a_0 \subseteq^ { \ltr } b_0 $
a sub 1 chi superscript u sub 1, dot dot dot, a sub n chi superscript u sub n, in S M.	$ a_1\chi^ { u_1 } , \ldots , a_n\chi^ { u_n } \inS [ M ] $
A sub 1 direct sum 2 times A sub 1 of 8.	$ A_1 \oplus 2A_1 ( 8 ) $
A sub 1 is greater than zero.	$ A_1 > 0 $
a sub 1, a sub 1	$ μ_ { a_4 } , μ_ { a_1 } $
A sub 1, A sub 2, dot dot dot	$ A_1 , A_2 , ... ) $
A sub 1, A sub 2, ellipsis, A sub k.	$ A_1 , A_2 , \dots , A_k $
A sub 1,1 raised to the power of 10, D sub 4,3 G sub 2,2	$ A_ { 1,1 } ^ { 10 } D_ { 4,3 } G_ { 2,2 } $
a sub 12 equals a sub 21 sigma sub 11 divided by sigma sub 22	$ a_ { 12 } = a_ { 21 } \sigma_ { 11 } /\sigma_ { 22 } $
A sub 2	$ A_ { 2 } $
a sub 2 double prime	$ a_ { 2 } '' $
a sub 2 is less than zero.	$ a_2 < 0 $
a sub 2.	$ a_2 $
A sub 2.	$ \mathcal { A } _2 $
A sub 3.	$ A_3 $
A sub 4.	$ A_4 $
a sub c.	$ a_c $
a sub d equals f of P sub d, N sub d	$ a_d = f ( P_d , N_d ) $
A sub E plus E sub	$ A '' \oplus E ' $
A sub eq sub 1	$ A_ { \textrm { eq } _1 } $
a sub i comma l	$ \forall l < j , a_ { i , l } =0 $
a sub i equals 0.	$ a_i=0 $
a sub i equals 2.	$ a_i=2 $
A sub i j.	$ A_ { ij } $
A sub i.	$ A_i $
a sub i.	$ a_i $
A sub iso.	$ A_\text { iso } $
a sub j prime greater than or equal to zero	$ a_ { j ' } \geq 0 $
a sub j, b sub j.	$ a_j , b_j $
a sub k.	$ a_k $
A sub L.	$ A_L $
A sub l.	$ A_ { \ell } $
a sub lam prime equals the maximum of r times d divided by negative 2 times L times m, comma, lam.	$ a_\lam'=\max\rd { -2\lam , \lam } $
A sub Lambda.	$ A_\Lambda $
A sub mu, Q equals A sub psi sub mu, Q	$ A_ { \mu , Q } = A_ { \psi_ { \mu , Q } } $
A sub n minus 1	$ A [ A_ { n-1 } ] $
a sub n of r.	$ a_n ( r ) $
a sub n plus one.	$ a_ { n+1 } $
A sub n tends to infinity	$ A_n\rightarrow \infty $
A sub n, sub n.	$ ( A_n ) _n $
A sub n.	$ A_n $
a sub n.	$ a_n $
a sub one equals b sub one	$ a_ { 1 } =b_ { 1 } $
a sub one equals one	$ a_ { 1 } =1 $
A sub one superscript ell of s, comma, B sub one superscript ell of s.	$ ( A_1^l ( s ) , B_1^l ( s ) ) $
A sub one.	$ A_1 $
a sub one.	$ a_1 $
a sub P equals 5.0.	$ a_P = 5.0 $
a sub p to the power of n, plus or minus.	$ a_p^ { ( n , \pm ) } $
A sub phi.	$ { A_\phi } $
A sub q equals t equals 1.	$ A_ { q=t=1 } $
A sub r.	$ A_r $
A sub S.	$ \mathcal { A } _ { S } $
a sub t.	$ a_t $
A sub ten.	$ A_ { 10 } $
A sub theta sub i	$ A_ { \theta_i } $
A sub true.	$ A_ { \rm true } $
A sub u.	$ A_u $
A sub V less than 3.	$ A_V < 3 $
A sub V.	$ A_V $
a sub x.	$ a_x $
a sub y.	$ a_y $
A sub zero comma negative one equals A sub one comma zero.	$ A_ { 0 , -1 } =A_ { 1,0 } $
A sub zero equals two point zero six six.	$ A_0 = 2.067 $
a sub zero.	$ a_0 $
a subscript 2	$ a_ { 2 } $
A subscript 2.	$ A_2 $
A subscript A sub 2.	$ { \bf A } _2 $
A subscript c.	$ A_ { c } $
A subscript Fe.	$ A_ { \rm Fe } $
A subscript i j equals f of V subscript j comma S subscript i j	$ A_ { ij } =f ( V_j , S_ { ij } ) $
A subscript k, A subscript k	$ ( A_ { k } , A_ { k } ) $
a subscript n	$ [ a ] _n $
a subscript p.	$ \boldsymbol { a } _p $
A subset A.	$ A_ { \text { mid } } \subset A $
A superscript zero	$ \A^0 $
a tends to infinity.	$ a\to \infty $
A tilde.	$ \tilde { A } $
a times b prime.	$ ab ' $
a times b times c.	$ abc $
A times H sub 1.	$ AH_1 $
a times t.	$ at row $
a times z	$ az $
A to the power of 1 sub a.	$ A^1_a $
A to the power of mu.	$ A^\mu $
A to the power of negative one.	$ A^ { -1 } $
A transpose A.	$ A^TA $
A union B.	$ A\cup B $
A union L union j of L.	$ A\cup L\cup j ( L ) $
A with a dot on top.	$ \mathring { A } $
A zero.	$ A_0 $
a-hat symbol.	$ \hat { a } $
a, a prime, belongs to A.	$ a , a'\in A $
A, alpha.	$ ( A , \ , \alpha ) $
a, b	$ a , b. $
a, b belong to A	$ a , b \in A $
a, b belong to the set of real numbers	$ a , b\in\RR $
a, b greater than zero.	$ a , b > 0 $
a, one less than or equal to a less than or equal to n bar minus d bar.	$ a , 1 \le a \le \bar { n } -\bar { d } $
a, r, R greater than 0	$ a , r , R > 0 $
A.	$ \mathit { A } $
ab	$ ab $
abs of x sub 1 minus x sub 2 less than rho	$ \abs { x_1-x_2 } < \varrho $
absolute value of a sub one.	$ |a_1| $
Absolute value of alpha is less than one.	$ \vert \alpha\vert < 1 $
Absolute value of center dot.	$ |\cdot| $
Absolute value of Delta sub k m is less than or equal to pi.	$ |\Delta_ { km } | \leq \pi $
Absolute value of Delta sub one two three of t.	$ ||\Delta_ { 123 } ( t ) || $
Absolute value of f of x minus f of a is less than or equal to C times the absolute value of x minus a.	$ |f ( x ) -f ( a ) | \le C |x-a| $
Absolute value of G equals 4.	$ |G'|=4 $
absolute value of g less than or approximately equal to 1.	$ |g|\lesssim1 $
Absolute value of H sub c star open parenthesis X sub 0 close parenthesis sub theta.	$ |H_c ^ * ( X_0 ) _ { \theta } | $
absolute value of J.	$ |J| $
Absolute value of lambda sub r is approximately distributed as 'O of 1'.	$ |\lambda_r|\sim \mathcal { O } ( 1 ) $
Absolute value of m sub z equals absolute value of n sub z.	$ |m_z|=|n_z| $
absolute value of nu.	$ |\nu| $
Absolute value of P prime is greater than or equal to delta raised to the power of epsilon times absolute value of P.	$ |P'| \geq \delta^ { \epsilon } |P| $
Absolute value of P sub r of L is less than little o of n to the power of three halves divided by r squared.	$ |P_r ( L ) | < o ( n^ { 3/2 } /r^2 ) $
Absolute value of phi prime is less than or equal to 12.	$ |\phi'| \leq \frac 12 $
absolute value of Q is greater than 2.	$ |Q| > 2 $
absolute value of S equals 4	$ |S|=4 $
absolute value of S sub k prime	$ |\mathcal { S } _ { k ' } | $
absolute value of s.	$ |s| $
absolute value of S.	$ |S| $
absolute value of Sigma.	$ |\Sigma| $
Absolute value of t minus n is less than or equal to the square root of N.	$ |t-n|\le \sqrt { N } $
Absolute value of T r of g is greater than 2.	$ |Tr ( g ) | > 2 $
absolute value of tau sub a.	$ |\vec \tau_a| $
Absolute value of the gradient of v equals absolute value of the gradient of v.	$ |\nabla|v||=|\nabla v| $
Absolute value of the intersection of I and J equals i plus u prime.	$ |I\cap J|=i+u ' $
Absolute value of V equals N.	$ |V|=N $
Absolute value of z sub i minus u, sub w, equals absolute value of z sub i minus u.	$ |z_i-u|_w=|z_i-u| $
Absolute value of z sub n minus w sub n, greater than or equal to zeta of vee.	$ |z_ { ( n ) } -w_ { ( n ) } |\ge \zeta ( \ve ) $
Absolute value of... times p sub n.	$ || ... || kp_n $
absolute value.	$ \left| \cdot \right| $
AdS 3: None	$ \mathrm { AdS } _3 $
AdS five.	$ AdS_5 $
Agt equals set of A, Bob.	$ \Agt=\set { Alice , Bob } $
ALMA	$ ALMA $
alpha	$ [ \alpha ] $
alpha bar.	$ \bar { \alpha } $
Alpha belongs to F.	$ \alpha \in F $
Alpha belongs to I.	$ \alpha \in I $
Alpha belongs to T.	$ \alpha \in T $
Alpha belongs to the interval from zero to one, excluding one.	$ \alpha\in [ 0,1 ) $
Alpha belongs to the open interval from 0 to 1.	$ \alpha\in ( 0,1 ) $
Alpha belongs to the set of complex numbers.	$ \alpha\in\C $
Alpha belongs to the set of p-bars of y3.	$ \alpha\in \pbar ( y_3 ) $
Alpha belongs to the set of rational numbers.	$ \alpha \in \mathbb { Q } $
Alpha belongs to the set X of S prime.	$ \alpha\in\mathcal { X } ( S ' ) $
Alpha beta.	$ \alpha\beta $
alpha comma beta.	$ ( \alpha , \beta ) $
Alpha comma beta.	$ \alpha , \beta $
Alpha equals 2.0.	$ \alpha=2.0 $
Alpha equals beta.	$ \alpha = \beta $
Alpha equals negative gamma star.	$ \alpha=-\gamma^ { * } $
alpha equals one point zero three.	$ \alpha=1.03 $
Alpha equals one.	$ \alpha = 1 $
Alpha equals open parenthesis alpha sub 1, ellipsis, alpha sub r close parenthesis.	$ \underline { \alpha } = ( \alpha_1 , \ldots , \alpha_r ) $
Alpha equals two.	$ \alpha=2 $
Alpha equals zero degrees.	$ \alpha=0^ { \circ } $
Alpha equals zero point five.	$ \alpha=0.5 $
Alpha equals zero point three.	$ \alpha=0.3 $
Alpha equals zero point two five.	$ \alpha=0.25 $
Alpha equals zero point two.	$ \alpha=0.2 $
Alpha equals zero point zero eight.	$ \alpha = 0.08 $
Alpha equals zero point zero zero one.	$ \alpha=0.001 $
Alpha equals zero.	$ \alpha=0 $
alpha g of X	$ \alg { X } $
Alpha greater than zero.	$ T , \alpha > 0 $
alpha hat.	$ \widehat { \alpha } $
alpha i	$ ( \alpha_i ) $
Alpha is defined as alpha sub 0 plus equals alpha sub 1 minus.	$ \alpha\equiv\alpha_0^+=\alpha_1^- $
Alpha is equivalent to the quantity z sub 0 divided by varpi squared, all raised to the power of 2.	$ \alpha \equiv \left ( z_ { 0 } / \varpi^ { 2 } \right ) ^ { 2 } $
Alpha is greater than one.	$ \alpha > 1 $
Alpha is greater than zero.	$ \alpha > 0 $
Alpha is less than d.	$ \alpha < d $
Alpha is less than gamma.	$ \alpha < \gamma $
Alpha is less than or equal to 2.	$ \alpha\leq 2 $
alpha L sub Y.	$ \alpha L_Y $
Alpha minus.	$ \alpha- $
alpha of ell	$ \alpha ( \ell ) $
Alpha of mu.	$ \alpha ( \mu ) $
Alpha of p.	$ \alpha ( p ) $
Alpha one equals zero point four.	$ \alpha_1=0.4 $
Alpha one is greater than zero.	$ \alpha_1 > 0 $
Alpha plus beta.	$ \alpha+\beta $
alpha plus one.	$ \al+1 $
Alpha prime belongs to script L.	$ \alpha ' \in \mathcal { L } $
Alpha prime greater than alpha greater than or equal to zero.	$ \alpha ' > \alpha\geq0 $
alpha script	$ \mathring { \alpha } $
Alpha squared F of omega	$ \alpha^ { 2 } F\left ( \omega\right ) $
Alpha squared F of omega.	$ \alpha^2F ( \omega ) $
Alpha squared.	$ \alpha^2 $
Alpha star.	$ \alpha^ * $
Alpha sub cosine equals 4.3.	$ \alpha_ { \text { CO } } = 4.3 $
Alpha sub eff.	$ \alpha_ { eff } $
Alpha sub i superscript k.	$ \alpha_ { i } ^k $
Alpha sub i.	$ \alpha_i $
Alpha sub k not in pi times the set of integers.	$ \alpha_k \notin \pi \mathbb { Z } $
Alpha sub n minus 1.	$ \alpha_ { n-1 } $
Alpha sub n, beta sub n, gamma sub n.	$ \alpha_ { n } , \beta_ { n } , \gamma_ { n } $
Alpha sub N.	$ \alpha_N $
Alpha sub phi.	$ \alpha_\phi $
Alpha sub plus/minus is equivalent to pi over 6 plus/minus eta over 2.	$ \alpha_ { \pm } \equiv \frac { \pi } { 6 } \pm \frac { \eta } { 2 } $
Alpha sub R.	$ \alpha_R $
Alpha sub t.	$ \alpha_t $
alpha sub v of omega	$ \alpha_v ( \omega ) $
Alpha sub v superscript i subscript a superscript j.	$ \alpha_ { v^i_a } ^j $
Alpha sub zero.	$ \alpha_0 $
Alpha t is greater than zero.	$ \alpha_t > 0 $
Alpha to the power of i equals alpha to the power of i.	$ [ \alpha^i ] = [ \alpha ] ^i $
Alpha to the power of negative one.	$ \alpha^ { -1 } $
alpha-hat.	$ \hat { \alpha } $
Alpha, omega.	$ \alpha , \omega $
Alpha.	$ \alpha $
alpha.	$ ( \alpha ) $
and	$ & $
Angle bracket delta y angle bracket equals zero.	$ \langle \delta y \rangle = 0 $
angle bracket dot.	$ \langle \cdot \rangle $
Angle bracket u raised to the power of t, angle bracket, subscript tau.	$ \langle u^t \rangle_\tau $
Angle bracket, dot, comma, dot, angle bracket, subscript 2.	$ \langle \cdot , \cdot \rangle_2 $
Angle bracket, xi of t, xi of t prime, angle bracket equals delta of t minus t prime.	$ \langle\xi ( t ) \xi ( t^\prime ) \rangle = \delta ( t-t^\prime ) $
Angle s, a, r, s prime angle	$ \langle s , a , r , s'\rangle $
ap of P sub i	$ \ap ( P_i ) $
apostrophe	$ ' $
Approximately 0.3	$ \sim0.3 $
Approximately 0.5.	$ \sim 0.5 $
Approximately 0.9	$ \sim 0.9 $
Approximately 13.	$ \sim13 $
Approximately 200.	$ \sim200 $
Approximately 234.	$ \sim 234 $
Approximately 370.	$ \sim 370 $
Approximately 45 degrees.	$ \sim 45^ { \circ } $
Approximately 70 percent.	$ \sim 70\ % $
approximately equal to.	$ \simeq $
Approximately m.	$ \sim_m $
Approximately one divided by one hundred.	$ \sim 1/100 $
Approximately one hundred to the power of two nanohertz.	$ \sim 10^2 \ , \mathrm { nHz } $
Approximately one hundred.	$ \sim 100 $
approximately one.	$ \sim { } 1 $
Approximately sixty.	$ \sim 60 $
Approximately ten to the power of four.	$ \sim10^4 $
Approximately ten to the power of negative four.	$ \sim 10^ { -4 } $
Approximately ten.	$ \sim 10 $
Approximately three hundred twenty.	$ \approx 320 $
Approximately twenty.	$ \sim 20 $
Approximately zero point one.	$ \sim 0.1 $
Approximately zero point three.	$ \sim 0.3 $
Approximately.	$ \approx $
Approximation of h-bar c divided by R.	$ \sim \hbar c/R $
Approximation symbol subscript 2.	$ \sim_2 $
are coefficients of the equation.	$ are coefficients of the $
are known as the ideal law	$ is called the unitary $
are notations as MAB.	$ are the same notations as MAB . $
are oh-pee-see-you.	$ are isotropic Gaussian $
are sample dee are.	$ are sampled from $
as the trip-orthogonal score percent.	$ as the triply-orthogonal score function . % Given $
asterisk	$ * $
at (None)	$ at $
At sub d p to the power of n	$ Feat_ { dp } ^n $
Aut of S.	$ [ \mathcal { W } ( A ) /Aut ( S ) ] $
Automorphism sub 1	$ \Autom_1 $
B	$ B $
b	$ b $
b B belongs to c B	$ \bB \in \cB $
B bar D raised to the power of i sub Sigma	$ \bbD^i_\Sigma $
B bar of 0, rho	$ \overline { B ( 0 , \rho ) } $
B bar sub theta	$ \overline { B } _\theta $
b belongs to B	$ b\in B $
b belongs to B equals A to the power of k plus one.	$ b \in B = A^ { k+1 } $
b belongs to the set B	$ b\in \mathcal { B } $
b belongs to the set of B of G	$ b \in B ( G ) $
b comma b prime	$ b , b ' $
b divided by a	$ b/a $
b equals alpha sub x beta sub y plus alpha sub y beta sub x.	$ b=\alpha_x\beta_y + \alpha_y\beta_x $
B equals mole times M one	$ B=\moyo { M } { 1 } $
b equals one, two, dot dot dot, B	$ b=1,2 , \cdots , B $
B g sub 3 superscript P O	$ \bg_3^ { \PO } $
b hat sub k.	$ \hat { b } _k $
B hat sub t	$ \mathcal { \hat B } _ { t } $
B hat.	$ \hat { B } $
b implies c tau nu.	$ b\to c\tau\nu $
B implies P.	$ B\to P $
B in squared, with inputs xi and x double prime.	$ { \cal B } _ { \tt in } ^2 ( { \vec x } _i , { \vec x } '' ) $
B is a subset of the interval from 0 to 1.	$ B \subset [ 0,1 ] $
B is a subset of X.	$ B \subseteq X $
b is greater than one.	$ \mathfrak { b } > 1 $
B is greater than zero.	$ B > 0 $
b minus c.	$ ( b ) - ( c ) $
b minus tau	$ b-\tau $
B n, k, w, d, m: None	$ B ( n , k , w , d , m ) $
B of f	$ \mathcal B ( f ) $
B of gamma.	$ \mathbb { B } ( \gamma ) $
B of lambda.	$ B ( \lambda ) $
B of w is a subset of B of w prime.	$ B ( w ) \subseteq B ( w ' ) $
B of y.	$ B ( y ) $
B one.	$ \mathcal { B } _1 $
B over B belongs to X.	$ B/B \in X $
b over c	$ b/c $
b prime	$ b ' $
B prime sub 1.	$ B'_1 $
B prime.	$ B^\prime $
B raised to the power of 0.	$ B^0 $
b raised to the power of b, R sub a b.	$ b^ab^bR_ { ab } $
b raised to the power of d is greater than zero.	$ b^ { \rm d } > 0 $
B raised to the power of H.	$ B^H $
b raised to the power of positive X equals 1.	$ b^+ ( X ) =1 $
b s f dagger	$ \bs { f } \bs { f } ^\dagger $
b squared	$ b^2 $
B squared N equals B sub t R sub t squared.	$ br^ { 2 } N=B_ { t } R_ { t } ^ { 2 } $
B star.	$ B^ * $
b sub 1	$ b_1 $
B sub 1, B sub 2.	$ B_1 , B_2 $
B sub 1.	$ B_1 $
b sub 2	$ \mathbf { b } _2 $
B sub 2 equals 6	$ B_2=6 $
B sub 2.	$ B_2 $
b sub 3 equals negative b sub 1 minus b sub 2	$ \bl { b } _ { 3 } =-\bl { b } _ { 1 } -\bl { b } _ { 2 } $
b sub 4	$ b_4 $
b sub a belongs to G	$ b_a \in G $
B sub alpha.	$ B_ { \alpha } $
B sub c.	$ B_c $
B sub epsilon of x	$ \bar B_\varepsilon ( x ) $
b sub f	$ b_f $
b sub i comma j	$ b_ { i , j } $
b sub i equals zero.	$ b_i = 0 $
b sub i is less than or equal to p sub NC of b.	$ b_i \leq p_ { NC } ( \b ) $
b sub i j	$ b_ { ij } $
b sub i star	$ b_i^ * $
B sub i sub 2 of G	$ B_ { i_ { 2 } } ( G ) $
B sub i superscript delta sub i.	$ \ { B_i^\delta\ } _i $
B sub i.	$ B_i $
B sub j.	$ B_ { j } $
b sub k prime k equals b sub k prime	$ b_ { k ' k } = b_ { kk ' } $
B sub k.	$ B_k $
b sub k.	$ b_k $
B sub L-infinity open parenthesis 0 comma R sub I close parenthesis.	$ B_ { L^\infty } ( 0 , R_I ) $
B sub lambda.	$ B_\lambda $
b sub m	$ b_m $
b sub n	$ b_n $
b sub n comma i, sub n greater than or equal to 1.	$ ( b_ { n , i } ) _ { n\geq 1 } $
b sub n over q sub n	$ b_n/q_n $
B sub n, open parenthesis, C sub m, close parenthesis.	$ B_n ( \mathbb { C } _m ) $
B sub n.	$ B_n $
B sub r	$ B_r $
b sub t	$ b_t $
b sub u	$ b_ { u } $
b sub w	$ b_w $
b subscript i.	$ b_i $
B T sub zero.	$ TB_0 $
b tends to infinity.	$ b\to \infty $
b tilde.	$ \widetilde { b } $
b times u	$ bu $
B times v sub 0, restricted to T in P sub k of T, subset RT sub k of T.	$ \bv_0|_T\in P_k ( T ) \subset RT_k ( T ) $
b times x sub i, where i is similar to P.	$ \bx_i\stackrel { iid } { \sim } P $
B times X sub t equals open parenthesis x times hat sub 1, ellipsis, x times hat sub t close parenthesis.	$ \bX_t = ( \xhat_1 , \ldots , \xhat_t ) $
B union L union R.	$ B\cup L\cup R $
b Z sub 2 direct sum b Z sub 2	$ \bZ_2\oplus \bZ_2 $
backslash	$ \ $
Bar i m is less than i m plus 1.	$ \bar { i } _m < i_ { m+1 } $
Bar nu mu to bar nu e	$ \bar\nu_\mu \to \bar\nu_e $
bar omega	$ \bar\omega $
bar omega greater than zero.	$ \bar\omega > 0 $
Bar P sub PM of T is approximately equal to 1.	$ \bar { P } _ { \rm PM } ( T ) \approx 1 $
Bar r sub i of 1 is not equal to bar r sub j.	$ \bar r_i ( 1 ) \ne \bar r_j $
bar tee b-x open parenthesis tee close parenthesis	$ \bar { \tbx } ( t ) $
Bar y to the power of 0 equals y to the power of 0.	$ \bar { y } ^ { 0 } =y^ { 0 } $
Bar z equals alpha times open parenthesis omega sub zero minus i delta comma t close parenthesis.	$ \bar { z } =\alpha ( \omega_0-i\Delta , t ) $
be a finite field of order.	$ be a finite field of order $
bee	$ \mathcal { B } $
bee an open cover.	$ be an open cover of $
bee sub open parenthesis en, comma j close parenthesis superscript rho	$ b_ { ( n , j ) } ^\rho $
belief sub zero.	$ \belief_0 $
belongs to the interval from negative one to one inclusive.	$ \in [ -1,1 ] $
beta belongs to Sigma.	$ \beta \in \Sigma $
Beta belongs to the open interval from zero to one-half, inclusive.	$ \beta \in \left ( 0 , \tfrac { 1 } { 2 } \right ] $
Beta belongs to the set of integers of S prime.	$ \beta\in\Omega_G ( S ' ) $
Beta belongs to the set of real numbers raised to the power of d.	$ \beta \in \mathbb { R } ^d $
Beta epsilon.	$ \beta_\epsilon $
Beta equals 4 C squared times the square root of the logarithm of T.	$ \beta = 4C^2 ( \log { T } ) ^ { \frac { 1 } { 2 } } $
Beta equals one divided by k sub B T.	$ \beta = 1/k_B T $
Beta equals the inverse of the product of k sub B and T.	$ \beta = ( k_BT ) ^ { -1 } $
beta equals theta of one	$ \beta=\Theta ( 1 ) $
Beta equals three halves alpha.	$ \beta = \frac { 3 } { 2 } \alpha $
Beta equals two.	$ \beta = 2 $
Beta equals zero.	$ \beta = 0 $
Beta gamma.	$ \beta\gamma $
Beta hat equals open square bracket, beta hat sub M semicolon bold symbol 0, close square bracket.	$ \hat { \beta } = [ \hat { \beta } _M ; \bm { 0 } ] $
beta hat.	$ \hat\beta $
Beta is greater than beta sub c.	$ \beta > \beta_c $
Beta is greater than or equal to zero.	$ \beta\geq0 $
Beta is greater than zero.	$ \beta > 0 $
Beta is less than alpha, which is less than beta prime.	$ \beta < \alpha < \beta ' $
Beta is less than gamma.	$ \beta < \gamma $
beta of dot.	$ \beta ( \cdot ) $
Beta of eta.	$ \beta ( \eta ) $
Beta of F.	$ \beta ( F ) $
beta of xi less than one	$ \beta ( \xi ) < 1 $
Beta one equals 0.9.	$ \beta_1=0.9 $
Beta one is greater than zero.	$ \beta_1 > 0 $
Beta star.	$ \beta^ { \star } $
Beta sub alpha.	$ \beta_\alpha $
Beta sub i.	$ \beta_i $
beta sub i.	$ \boldsymbol { \beta } _i $
Beta sub j equals zero.	$ \beta_j=0 $
Beta sub j of t.	$ \beta_j ( t ) $
Beta sub k i nearrow sub W beta prime sub k i.	$ \beta_ { k_i } \nearrow_W \beta ' _ { k_i } $
beta sub k.	$ \ { \beta_k\ } $
Beta sub k.	$ \beta_k $
Beta sub one.	$ \beta_ { 1 } $
Beta sub R.	$ \beta_R $
Beta sub U.	$ \beta_U $
Beta sub x.	$ \beta_x $
Beta sub zero.	$ \beta_0 $
Beta tends to infinity.	$ \beta\to\infty $
Beta three.	$ \beta_3 $
Beta to the power of k.	$ \beta^k $
beta, capital I, subscript PC, open parenthesis, delta, close parenthesis.	$ \bI_ { \rm PC } ( \bbeta ) $
Beta, h, U, open parenthesis, c, G, S, close parenthesis, arrow, h, U, open parenthesis, c, G, S, close parenthesis.	$ \beta : \h { U ( \cG_S ) } \to \h { U ( \cG_S ) } $
beta, open parenthesis, d a, close parenthesis.	$ \beta ( \blambda ) $
beta.	$ \bm { \beta } $
Beta.	$ \beta $
BF, open parenthesis, H sub 2 divided by H sub 1, close parenthesis.	$ \mathrm { BF } ( H_2/H_1 ) $
BG (None)	$ BG $
big c p x	$ \bigcpx $
big cup sub i A sub i equals M	$ \bigcup_i A_i = M $
big O of 2.	$ \mathcal { O } ( 2 ) $
big O of alpha s.	$ \mathcal { O } ( \alpha_s ) $
Big O of e to the power of negative alpha one over two times t.	$ O\left ( e^ { - \frac { \alpha_1 } { 2 } t } \right ) $
Big O of K p c n	$ O ( Kpcn ) $
Big O of L n f squared	$ \mathcal { O } ( Lnf^2 ) $
Big O of m log n	$ O ( m\log n ) $
Big O of m sub f over v	$ \mathcal { O } ( m_f/v ) $
big O of N to the fourth power.	$ \mathcal { O } ( N^4 ) $
big O of N.	$ \mathcal { O } ( N ) $
big O of n.	$ \mathcal { O } ( n ) $
big O of one percent.	$ O ( 1\ % ) $
big O of one.	$ \mathcal { O } ( 1 ) $
Big O of p max n to the power of 4 times the logarithm of n plus the logarithm of v sub max.	$ O ( \pmax n^4 ( \log n + \log v_ { \max } ) ) $
big O of q squared.	$ \mathcal O ( q^2 ) $
Big O of skd	$ O ( skd ) $
Big O of T times m times k	$ O ( Tmk ) $
Big O of the square root of k divided by n.	$ O ( \sqrt { { k } / { n } } ) $
Big O of x	$ \OM ( x ) $
Big O sub p, s sub n, open parenthesis, n plus d sub n, close parenthesis.	$ O_ { p } ( \mathfrak { s } _ { n } ( n +d_ { n } ) ) $
big-vee.	$ \aggavg $
binomial coefficient n plus k choose k	$ \binom { n+k } { k } $
bj	$ b_j $
Body O sub i open parenthesis zero close parenthesis	$ \bdyO_i ( 0 ) $
Bold 0.952 sub plus or minus 0.054	$ \bf { 0.952_ { \pm0.054 } } $
Bold B equals open parenthesis zero, zero, negative B close parenthesis.	$ \boldsymbol { B } = ( 0,0 , -B ) $
Bold c equals C of bold q, bold T.	$ \textbf { c } = \mathcal { C } ( \textbf { q } , \textbf { T } ) $
Bold e sub i prime equals bold e sub j a to the power of j sub i prime.	$ { \bm e } _ { i ' } = { \bm e } _j a^j { } _ { i ' } $
Bold E sub rel T	$ \boldsymbol { \mathcal { E } _ { rel } ( T ) } $
Bold F, subscript dot 2, superscript tiny upsatche OLS.	$ { \bm F } _ { \cdot 2 } ^ { \text { \tiny \upshape OLS } } $
Bold G sub 2 equals open parenthesis 0, 2 pi close parenthesis.	$ \bm { G } _2= ( 0 , 2\pi ) $
Bold g sub k equals pi sub k bold g	$ \bfg_k : = \pi_k \bfg $
Bold H superscript t	$ \ { \bm\ { H^ { ( t ) } $
Bold k d raised to the power of M, j, is defined as delta times fun subscript x raised to the power of M, j.	$ \fkd^ { M , j } \coloneqq\deltafun_ { x^ { M , j } } $
Bold n sub sigma prime equals tau sub sigma t sub sigma perpendicular.	$ \bfn_\sigma'=\tau_\sigma\bft_\sigma^\perp $
Bold Omega sub j to the power of mu, sigma.	$ \boldsymbol { \Omega } _j^ { \mu , \sigma } $
Bold pi transpose, bold Psi of zero is less than or equal to bold zero transpose.	$ \bm { \pi } ^\top\bm { \Psi } ( 0 ) \le \bm { 0 } ^\top $
bold rho.	$ \bm \rho $
Bold s equals bold x plus v sub z of bold x divided by a H hat z.	$ \bm { s } = \bm { x } + \frac { v_z ( \bm { x } ) } { aH } \hat { z } $
bold Sigma	$ \bm\Sigma $
bold symbol Theta	$ \boldsymbol\ { \Theta $
Bold v belongs to the set of all H to the power of 1 sub 2 of X, raised to the power of L.	$ \bm { v } \in \left [ H^1_2 ( X ) \right ] ^L $
bold x	$ { \bf x } $
Bold x raised to the power of alpha	$ \bm { x } ^ { ( \alpha ) } $
bold x raised to the power of negative	$ \bm { x } ^- $
boldface	$ \fbd $
box o	$ { \bm o } $
Br of E over F	$ { \rm Br } ( E/F ) $
Byposition 2.2 times the cite of v times the minimum and negative Ka times the hyperbolic sine.	$ . By Proposition 2.2 of \cite { vu2013minimax } and Davis-Kahan sin $
byposition is greater than congruent to csc.	$ . By Proposition~\ref { > conic } , $
C	$ C $
c	$ c $
ĉ	$ \check F ( t , t ' ) =\delta ( t-t ' ) \check F ( t ) $
c A belongs to the set of real numbers raised to the power of JJF.	$ \cA\in \R^ { \JJF } $
c A, c B	$ ( \cA , \cB ) $
c bar.	$ \bar { c } $
C belongs to the set of C.	$ C \in \mathcal { C } $
c belongs to the set of m c choose C.	$ c\in\mc { C } $
c curved arrow left c	$ c \curvearrowleft c $
c equals 5	$ c=5 $
c equals one	$ c=1 $
c equals the ordered pair one comma zero.	$ \mathbb { c } = ( 1,0 ) $
c equals three.	$ c=3 $
c equals zero.	$ c=0 $
C equals zero.	$ C=0 $
C F sub C B	$ \CF_ { \CB } $
c greater than or equal to lambda times open parenthesis delta minus lambda plus 2 close parenthesis	$ c\ge \lambda ( \delta-\lambda+2 ) $
c greater than zero	$ c > 0 $
C hat G t.	$ \hat { \bm { C } _ { gt } } $
C hat sub j.	$ \hat { C } _j $
C i choose k.	$ C_i^k $
C infinity of the closure of Omega.	$ C^\infty ( \overline \Omega ) $
C infinity of z	$ C_\infty ( z ) $
C infinity sub loc	$ C^\infty_ { \rm loc } $
C infinity.	$ C^\infty $
C intersect C prime.	$ C\cap C ' $
C is a subset of W.	$ C\subset W $
c is greater than negative one.	$ c > -1 $
C is greater than zero.	$ C > 0 $
c is not equal to zero	$ c\neq \zeror $
C k.	$ \mathcal { C } ^k $
c less than m times I sub N.	$ c < \mI_ { N } $
c m to the power of negative one	$ cm^ { -1 } $
C max.	$ C_ { max } $
c of 0 equals c of 1 equals x	$ c ( 0 ) =c ( 1 ) =x $
C of 0.	$ C ( 0 ) $
c of d	$ \mathbf { c } ( \mathbf { d } ) $
C of D.	$ \mathcal C ( D ) $
c of F is greater than 0	$ c\left ( { \cal F } \right ) > 0 $
C of G	$ C ( G ) $
c of j	$ c ( j ) $
C of mu, sigma.	$ C ( \mu , \sigma ) $
c of t	$ c ( t ) $
c of T divided by K sub B, goes to 1	$ c\left ( T\right ) /K_ { B } \rightarrow 1 $
C of v	$ C ( v ) $
C of v d	$ C ( \vd ) $
C of x.	$ C ( x ) $
C one comma one.	$ C^ { 1,1 } $
C one.	$ \mathcal { C } _1 $
C plus or minus	$ C_ { \pm } $
c prime sub 2	$ c'_2 $
C prime.	$ \mathscr { C } ' $
C raised to the power of 0.	$ C^0 $
c raised to the power of 1 to 0.	$ c^ { 1\to 0 } $
C raised to the power of 1, alpha.	$ C^ { 1 , \alpha } $
C raised to the power of 1.	$ C^1 $
C raised to the power of d.	$ C^d $
c raised to the power of k ell.	$ c^ { ( k\ell ) } $
C raised to the power of k.	$ C^k $
C raised to the power of m c V.	$ C^ { \mc V } $
C raised to the power of open square bracket, d squared times d prime, close square bracket.	$ \mbb { C } ^ { [ d^ { 2 } \cdot d ' ] } $
C raised to the power of r sub sigma comma l is greater than zero.	$ C^r_ { \sigma , l } > 0 $
C raised to the power of r, open parenthesis, capital omega, close parenthesis.	$ C^r ( \Omega ) $
C rho sub A B.	$ C ( \rho_ { AB } ) $
C script.	$ \mathscr { C } $
c squared	$ c^2 $
C squared divided by Z squared.	$ \C^2 / \Z^2 $
c squared sub e comma i equals the variance of T sub e comma i of 1	$ c^2_ { e , i } = { \rm Var } ( T_ { e , i } ( 1 ) ) $
C squared.	$ \C^2 $
C star sub s t open parenthesis X close parenthesis	$ \Cstar_ { \sbt } ( X ) $
C star.	$ C^ { * } $
c sub 1	$ c_ { 1 } $
C sub 1 equals 0.	$ C_1 = 0 $
c sub 1 equals 1.	$ c_1=1 $
c sub 1 is greater than zero.	$ c_1 > 0 $
c sub 1, C sub 1.	$ c_1 , C_1 $
c sub 1, c sub 2 greater than 0.	$ c_1 , c_2 > 0 $
C sub 1, ellipsis, C sub n.	$ C_1 , \ldots , C_n $
C sub 1.	$ C_1 $
C sub 12	$ \mathcal { C } _ { 12 } $
C sub 13.	$ C_ { 13 } $
c sub 13.	$ c_ { 13 } $
c sub 2	$ c_2 $
c sub 2 equals c sub 2 open parenthesis k comma c close parenthesis	$ c_2=c_2 ( k , c ) $
c sub 2 is greater than zero.	$ c_2 > 0 $
C sub 2 is greater than zero.	$ C_2 > 0 $
C sub 2 open parenthesis E close parenthesis equals 2	$ C_ { 2 } ( E ) = 2 $
C sub 2 times T times R.	$ C_ { 2 } \TR $
C sub 2.	$ ( C_2 ) $
C sub 2z.	$ C_ { 2z } $
c sub 3	$ c_3 $
C sub 3 is greater than zero.	$ C_3 > 0 $
C sub 3.	$ C_3 $
c sub 4	$ c_4 $
C sub 4 equals 0	$ C_ { 4 } \ ! = \ ! 0 $
C sub 4 to C sub 2	$ C_4\to C_2 $
C sub 4.	$ C_4 $
C sub 5.	$ C_5 $
C sub 6 is greater than zero.	$ C_6 > 0 $
C sub a	$ C_ { \mathbf { a } } $
c sub D	$ c_D $
C sub d of V	$ C_d ( V ) $
c sub e f f of p	$ c_ { \eff } ( p ) $
C sub ell to the power of TT.	$ C_\ell^ { TT } $
C sub h.	$ C_h $
c sub i	$ c_i $
c sub i equals c sub n plus m minus i plus 1.	$ c_i = c_ { n+m-i+1 } $
c sub i g r	$ c_ { igr } $
C sub i j is greater than zero.	$ C_ { ij } > 0 $
C sub i j.	$ C_ { ij } $
C sub i minus 1 k	$ C_ { i-1 } \calk $
c sub i of t	$ c_i ( t ) $
C sub i.	$ \mathcal { C } _i $
c sub i.	$ \ { c_i\ } $
c sub j equals open parenthesis c sub j A, c sub j B close parenthesis transpose	$ c_j= ( c_ { j , \mathrm { A } } , c_ { j , \mathrm { B } } ) ^T $
C sub j.	$ C_j $
C sub k is greater than zero.	$ C_k > 0 $
c sub k, ell equals 1	$ c_ { k , \ell } =1 $
C sub k.	$ C_ { k } $
c sub kappa	$ c_\kappa $
C sub l	$ C_l $
C sub L.	$ C_\ell $
C sub l.	$ C_ { \ell } $
c sub l.	$ c_l $
c sub l2.	$ c_ { l2 } $
C sub m	$ C_ { \rm geom } $
c sub n l	$ c_ { nl } $
C sub n.	$ \cC_n $
c sub one.	$ c_1 $
C sub p.	$ C_p $
C sub q.	$ C_q $
c sub r	$ c_r $
c sub r equals omega sub 0 divided by natural logarithm alpha.	$ c_r= \omega_ { 0 } / { \breve \alpha } $
C sub r.	$ C_r $
C sub s, E sub s.	$ C_s , E_s $
C sub s.	$ C_S $
C sub S.	$ \cal { C } _S $
c sub s.	$ c_s $
c sub six.	$ c_6 $
c sub t	$ c_t $
C sub tau m	$ C_ { \taum } $
c sub ten is greater than zero.	$ c_ { 10 } > 0 $
C sub u of X.	$ \CC_u [ X ] $
C sub u.	$ C_u $
C sub U.	$ C_ { U } $
c sub u.	$ c_u $
C sub V.	$ C_V $
C sub vee	$ C_\ve $
c sub w.	$ c_w $
C sub X is defined as the sequence of r sub j for j equals 1 to n.	$ C_X : = \ { r_j\ } _ { j = 1 } ^n $
C sub zero	$ C_0 , $
c sub zero.	$ c_0 $
C sub zero.	$ C_0 $
C subset C P to the power of 1.	$ \C\subset\CP^1 $
c substar of nu	$ c_ * ( \nu ) $
c T sub R.	$ \cT_R $
c t, x, y, z	$ ( ct , x , y , z ) $
C three.	$ \mathcal { C } _3 $
C tilde, script C.	$ \widetilde { \mathcal { C } } $
c tilde.	$ \tilde { c } $
c times b	$ cb $
c times Q sub rIII	$ \cQ_ { \rIII } $
C to the power of 2 plus epsilon	$ C^ { 2 + \epsilon } $
C to the power of 3, alpha.	$ C^ { 3 , \alpha } $
C to the power of a times b.	$ C^ { ab } $
C to the power of infinity.	$ C^ { \infty } $
C to the power of negative x is less than or equal to B to the power of negative x.	$ C^- ( x ) \leqslant B^- ( x ) $
C V sub zero	$ \cV_ { 0 } $
C V.	$ \CV $
c-hat symbol.	$ \hat { c } $
C-hat.	$ \hat { \mathcal { C } } $
c, C sub 2, open curly brace, mathcal P, close curly brace.	$ \cC_2 ( \ { \mathcal\ P ) $
C, Q.	$ ( \mathbb { C } , \mathbb { Q } ) $
C, S	$ ( C , S ) $
C: None	$ \mC $
C.	$ \mathbb C $
Ca over Bo	$ Ca/Bo $
Cal B of t to c gamma	$ { \cal B } ( t \ ! \to\ ! c \gamma ) $
Cal B sub t open parenthesis dot, u, ancchild open parenthesis w prime, u close parenthesis close parenthesis.	$ \calB_t ( \cdot , u , \ancchild ( w ' , u ) ) $
Cal C sub 1 minus C sub 1 is less than or equal to negative 0.1, L cubed.	$ { \cal C } _1 -C_1 \leq -0.1\ , L^ { 3 } $
cal M, subscript L R, superscript W	$ { \cal M } _ { LR } ^ { WW } $
cal, D	$ \ { \cal\ { D $
capital A	$ \textbf { A } $
capital I.	$ \mathcal { I } $
capital M.	$ \mathcal M $
capital N	$ \mathbf { N } $
capital P	$ \cal P $
capital Q	$ \mathcal { Q } $
capital R	$ \mathcal { R } $
capital Y.	$ \boldsymbol { Y } $
card	$ \Card $
Cbold	$ \Cbold $
CCC, J	$ ( \CCC , J ) $
cdots	$ based on two latent vectors : $
cE sub cI sub 1, ellipsis, cI sub r, open parenthesis, G star, close parenthesis, equals G star.	$ \cE_ { \cI_1 , \ldots , \cI_r } ( G^ * ) = G^ * $
center dot.	$ \cdot $
CeRh 2 As 2: None	$ \mathrm { CeRh } _2\mathrm { As } _2 $
ch N 2 plus	$ \ch { N2^+ } $
Ch of X	$ { \rm Ch } ( X ) $
Check in Fig, forget result, and clarify that for.	$ , plotted in Fig.~\ref { fig : mis-degree-result } , and clarify that for $
Checkmark.	$ \checkmark $
Chi belongs to the set of irreducible representations of the quotient group Z of G divided by the center of G.	$ \chi\in \textup\ { Irr ( Z ( G ) /Z ( G ) ^ { \circ } ) $
chi dagger	$ \chi^ { \dagger } $
Chi equals negative one raised to the power of n times chi of X.	$ \chi = ( -1 ) ^n \cdot \chi ( X ) $
chi hat.	$ \hat { \chi } $
chi minus	$ \chi- $
chi of dot	$ \chi ( \cdot ) $
Chi of G is less than or equal to omega of G plus one.	$ \chi ( G ) \le \omega ( G ) +1 $
chi of u u	$ \chi ( \uu ) $
Chi prime times beta inverse.	$ \chi '' \beta^ { -1 } $
chi prime.	$ \chi^ { ' } $
Chi squared divided by f equals 1129 divided by 915 equals 1.23.	$ \chi^2/ { \rm dof } =1129/915=1.23 $
chi squared.	$ \chi^ { 2 } $
chi sub a c of T	$ \chi_ { \text { ac } } ( T ) $
Chi sub f.	$ \chi_f $
chi sub i.	$ \chi_i $
chi sub j of q	$ \chi_j ( q ) $
chi sub J, a b.	$ \chi_ { J , ab } $
chi sub one.	$ \chi_1 $
chi sub S.	$ \chi_S $
Chi sub zero.	$ \chi_0 $
chi tilde sub c.	$ \tilde { \chi } _c $
chi.	$ \chi $
class divided by C	$ \class { unitaryC } $
close parenthesis	$ ) & { $
closing brace	$ } $
closing bracket	$ ] $
closing parenthesis	$ ) $
Cluster sub i.	$ Cluster_ { i } $
CO subscript 2	$ CO_2 $
colon	$ : $
comma	$ , $
Connnf to the power of star three, left parenthesis, frown ig, right parenthesis.	$ \connf^ { \star 3 } \left ( \orig\right ) $
cont	$ \cont $
conv1	$ conv1 $
cos alpha equals zero.	$ \cos\alp=0 $
cosecant of E	$ \check E $
Cosecant of f of K sub a sub i is a subset of CE sub 1 of s prime sub i minus 1, s prime sub i.	$ \CC ( f ( K_ { a_i } ) ) \subseteq \CE_1 ( s ' _ { i-1 } , s'_i ) $
cosine	$ \COshift $
Covariance sub prior 2 of s comma t equals the minimum of s plus 1 comma t plus 1.	$ \text { Cov } _ { prior2 } ( s , t ) = \min\left ( s+1 , t+1\right ) $
CP (None)	$ CP $
Crude N times A, B.	$ \CrudeNN ( A , B ) $
Cs. None.	$ C_ { \mathrm { s } } $
cT sub i equals cT sub i open parenthesis c sub i comma rho sub i close parenthesis	$ \cT_i : = \cT_i ( c_i , \rho_i ) $
cubed, P G sub 2	$ ^3PF_2 $
cue	$ \mathbf Q $
Curly brace A comma B belongs to bold S superscript mu plus mu prime minus 2 subscript delta.	$ \ { A , B\ } \in \mathbf S^ { \mu+\mu'-2 } _\delta $
Curly brace a, comma b, curly brace, comma b belongs to script V of script G sub 2.	$ \ { a , b\ } , b\in \mathcal { V } ( \mathcal { G } _2 ) $
Curly brace x sub 1, comma, x sub 2, curly brace, subset or equal to, script X.	$ \ { x_1 , x_2\ } \subseteq\mathcal { X } $
Curly brace z of Q, sub Q in top.	$ \ { z ( Q ) \ } _ { Q \in \text { Top } } $
Curly brace, bold K, right arrow, bold 0.	$ \ { \bf\ K\rightarrow\bf0 $
Curly brace, Na, subscript, alpha in script A.	$ \ { \Na\ } _ { \alpha\in\mathcal { A } } $
Curly brace, nu raised to the power of A a, comma, B b, colon, A a, comma, B b in the interval from 0 to infinity.	$ \ { \nu^ { \Aa , \Bb } : \Aa , \Bb \in ( 0 , \infty ) \ } $
Curly brace, phi sub v m, end curly brace, sub v m in curly brace, one comma two, end curly brace, to the power of d.	$ \ { \phi_ { \vm } \ } _ { \vm\in\ { 1,2\ } ^d } $
Curly brace, square root of gamma, g sub m sub k, curly brace, raised to the power of infinity, sub k equals 1.	$ \ { \sqrt { \Gamma } \ , g_ { m_k } \ } ^ { \infty } _ { k = 1 } $
Curly brace, tau equals zero.	$ \ { \tau=0\ } $
Curly brace, v, comma, x raised to the power of i, comma, u of s, curly brace.	$ \ { v , x^i , u ( s ) \ } $
Curly brace, w sub k of d x, end subscript, subscript k equals 1, superscript infinity.	$ \ { w_k ( \bdx ) \ } _ { k=1 } ^\infty $
Curly brace, z raised to the power of alpha, end curly brace, subscript alpha in the interval from n minus 1 to d.	$ \ { z^\alpha\ } _ { \alpha\in [ n-1 ] ^d } $
curly braces s sub n	$ \ { s_ { n } \ } $
Curly braces x sub i, y sub i equals 1.	$ \pair { x_i , y_i } = 1 $
Curly braces, four, script R.	$ { } ^4\mathcal { R } $
CZ: None	$ CZ $
d	$ d $
D	$ D $
D bar D to D s plus D s minus	$ D\bar { D } \to D_s^ { + } D_s^ { - } $
d belongs to the set of integers	$ d \in \mathbb { Z } $
d bold.	$ \mathbf { d } $
d c.	$ d_c $
D divided by sigma.	$ D { / } \sigma $
D E of S to the power of r s is a subset of D E of S.	$ \DE ( S ) ^ { \rs } \subset \DE ( S ) $
d E.	$ dE $
D equals 6.	$ D=6 $
d equals four.	$ d=4 $
d equals h, open parenthesis, open hat x parallel s prime, close parenthesis, comma, s.	$ d=h ( ( \hat { \x } \parallel s ' ) , s ) $
d equals lambda divided by 2.	$ d=\lambda/2 $
d equals one.	$ d=1 $
D equals ten.	$ D=10 $
D equals the set of open parenthesis x sub i, comma y sub i close parenthesis raised to the power of N sub i equals 1.	$ D = \ { ( x_i , y_i ) \ } ^N_ { i=1 } $
D equals the union over i of D sub i.	$ \boldsymbol { D } =\cup_iD_i $
d equals three.	$ d=3 $
d equals two.	$ d=2 $
D equals two.	$ D = 2 $
d equals zero.	$ d=0 $
D f	$ Df $
D four.	$ D_4 $
D goes to P sub 1 P sub 2 ell plus nu ell.	$ D\to P_1P_2\ell^+\nu_\ell $
d greater than one	$ d > 1 $
d greater than or equal to 2	$ d\ge 2 $
d greater than or equal to 3.	$ d\ge 3 $
D greater than or equal to 6K.	$ D\geq 6K $
D greater than or equal to D sub beta.	$ D \ge D_\beta $
D greater than zero.	$ D > 0 $
d greater than zero.	$ d > 0 $
D h.	$ D_h $
d is equivalent to 1 modulo 3.	$ d\equiv 1 ( mod\ 3 ) $
d is greater than 2.	$ d > 2 $
d is greater than or equal to 1.	$ d \geq 1 $
d is greater than or equal to 2.	$ d \ge 2 $
d is greater than or equal to 3.	$ d \ge 3 $
d is in the set of B-hat	$ d\in\hat { B } $
d is less than 10.	$ d < 10 $
d is less than or equal to the fraction R sub 0 divided by 8, which is less than the fraction R sub 0 divided by 4.	$ d\le \frac { R_0 } { 8 } < \frac { R_0 } { 4 } $
D M sub C G M.	$ { \rm DM_ { \rm CGM } } $
d minus one	$ d-1 $
D much greater than 1	$ D \gg 1 $
d of b sub 0, y is less than or equal to D	$ d ( b_0 , y ) \leq D $
D of Gamma equals diag of d sub u1, d sub u2, dot dot dot, d sub un.	$ D ( \Gamma ) =diag ( d_ { u_1 } , d_ { u_2 } , \cdots , d_ { u_n } ) $
d of i comma j	$ d ( i , j ) $
D of omega.	$ D ( \omega ) $
d of t function.	$ d ( t ) $
D of Y goes to D of X.	$ \cal { D } ( Y ) \to \cal { D } ( X ) $
D of Y.	$ D ( Y ) $
D one.	$ D_1 $
D plus K minus.	$ D^+ K^- $
d plus one	$ d+1 $
d plus one.	$ ( d+1 ) $
D precedes D prime.	$ D\prec D ' $
d Q sub w equals d E	$ dQ_ { \mathrm { w } } =dE $
d raised to the power of 8.	$ d^8 $
D raised to the power of b, open parenthesis, co-h A, close parenthesis.	$ D^b ( \operatorname { coh } \mathcal { A } ) $
D raised to the power of c, acting on u.	$ D^c u $
d raised to the power of i.	$ d^i $
D raised to the power of negative Q prime.	$ D^- ( Q ' ) $
D raised to the power of p plus 1.	$ \mathcal { D } ^ { ( p+1 ) } $
D raised to the power of star, subscript s.	$ D^ { ( * ) } _ { ( s ) } $
D raised to the power of zero, goes to V V prime.	$ D^0\to VV^ { \prime } $
d raised to the power of.	$ ^ { d } $
d s	$ ds $
D set minus D sub O.	$ D\setminus D_O $
D squared.	$ D^2 $
d star	$ d^\star $
D star sub s, B star sub s	$ D^ { * } _ { s } B^ { * } _ { s } $
D star.	$ D^ * $
d sub 0 equals 1.	$ d_0=1 $
d sub 1 minus rank of b times v sub 1	$ d_1 - \operatorname { rank } ( \bv_1 ) $
D sub 12.	$ D_ { 12 } $
D sub 2.	$ D_2 $
D sub 2h.	$ D_ { 2h } $
d sub 3	$ d_3 $
D sub 3.	$ D_3 $
d sub A of gamma equals 2	$ d_ { \mathcal { A } } ( \gamma ) =2 $
D sub A sub 1	$ D_ { A_1 } $
D sub A.	$ \mathcal { D } _A $
d sub b.	$ d_b $
D sub b.	$ D_b $
D sub C D	$ \mathcal { D } _\text { CL } $
D sub e.	$ \mathcal { D } _e $
D sub ell w	$ \mathcal { D } _ { \rm lw } $
D sub F	$ D_\mathcal F $
D sub i comma j.	$ D_ { i , j } $
D sub i prime.	$ D_i ' $
D sub i.	$ D_i $
d sub i.	$ d_i $
D sub j.	$ D_j $
d sub j.	$ d_j $
D sub K L superscript TT	$ D_ { KL } ^ { TT } $
D sub k to the power of i plus 1.	$ D_k^ { i+1 } $
d sub L, open parenthesis, v sub i plus 1, close parenthesis, equals 0.	$ d_L ( v_ { i+1 } ) =0 $
D sub L.	$ D_L $
D sub lambda.	$ \calD_ { \lambda } $
d sub m minus n minus 1 belongs to the set 1, 2, 3, 4, 6.	$ d_ { m- ( n-1 ) } \in \ { 1 , 2 , 3 , 4 , 6\ } $
D sub m.	$ D_m $
D sub N.	$ \mathsf { D } _N $
D sub n.	$ D_n $
D sub obs.	$ D_\mathrm { obs } $
d sub one.	$ d_1 $
d sub R is not equal to zero, d sub Z is not equal to zero.	$ d_R\neq0 , d_Z\neq 0 $
D sub s of X.	$ \cD_s ( X ) $
D sub s plus.	$ D_s^+ $
d sub s.	$ d_s $
D sub s.	$ D_s $
d sub t of S equals zero	$ d_t ( S ) = 0 $
D sub t.	$ \mathcal { D } _t $
d sub x squared minus y squared.	$ d_ { x^2-y^2 } $
D sub X.	$ \mathcal { D } _X $
d sub x.	$ d_x $
d sub Y of f of x, f of x prime, less than or equal to omega of d sub X of x, x prime.	$ d_Y ( f ( x ) , f ( x ' ) ) \leq \omega ( d_X ( x , x ' ) ) $
d sub z	$ d_ { z } $
D sub zero equals the diameter of G.	$ D_0=\diam G $
d sub zero not equal to d sub zero prime	$ d_0\neq d_0 ' $
D subscript f.	$ D_ { f } $
d subscript i	$ d_ { i } $
D subscript k.	$ D_k $
d subscript xz	$ d_ { xz } $
d t squared plus g hat sub 1	$ dt^2 + \check { g } _1 $
d t squared.	$ dt^2 $
d tends to infinity.	$ d\to\infty $
D three.	$ \mathcal { D } _3 $
D train.	$ D_ { train } $
D traj gets empty set.	$ \mathcal { D } _ { \rm traj } \gets \emptyset $
d underline	$ \underline { d } $
D zero star.	$ D_0^ * $
D.	$ { \rm D } $
d.	$ \textbf { d } $
D. None	$ D , $
dagger.	$ ^ { \dagger } $
dee E over dee pee	$ d\mathcal { E } /dp $
dee ess similar to symptotic.	$ \dsim { \symbdomain } $
dee eye cosine	$ \dico $
dee over delta sub min	$ d/\Delta_ { \min } $
dee S by dee U.	$ dS/dU $
dee sub a	$ d_ { a } $
dee sub G	$ \dd_G $
dee to the power of k.	$ \cD^k $
dee underscore spectral density matrices.	$ denote the spectral density matrix of $
dee w of Y	$ \dw ( Y ) $
dee-bee-ay-dee	$ \dbAdj $
dee-dee	$ \mathbf { DP } $
dee-kappa	$ \rm dSch_k $
dee.we can infer that	$ , which we write as $
degree of s, multiplied by f sub 2.	$ \deg ( [ s ] ) f_2 $
Degree of the set C infinity.	$ \deg_ { \mathscr { C } _ { \infty } } $
del f.	$ \nabla f $
Del-int S-f-r K-a-D-c-conditioned.	$ \DelayedSfrKappaDcConditioned $
Delta 2.	$ \delta_2 $
Delta A F equals negative one.	$ \Delta_A F = -1 $
Delta bar en rho semicolon beta comma wh sub m superscript wv	$ \overline { \Delta } _\ener ( R ; \beta , \wh { \beta } _m^ { \wv } ) $
delta bar sub zero.	$ \bar { \delta } _0 $
delta bar theta sub q	$ \delta\bar\theta_q $
delta belongs to the domain of q sub 1.	$ \delta \in \dom q_1 $
delta belongs to the open interval from zero to one, inclusive.	$ \delta \in ( 0,1 ] $
delta belongs to the set of all numbers raised to the power of negative N.	$ \delta \in 2^ { -\N } $
delta c	$ \Delta c $
delta c sub 1 equals negative 0.239.	$ \delta c_1=-0.239 $
Delta C sub cal	$ \Delta C_ { \rm cal } $
Delta chi squared.	$ \Delta \chi^2 $
Delta chi superscript less than, greater than	$ \mathbf { \Delta } _\chi^ { < , > } $
Delta D P sub c	$ \Delta DP_ { c } $
Delta E max equals m pi over 2 times open parenthesis minus m ell squared over m pi squared close parenthesis.	$ \Delta E^\mathrm { max } =m_\pi/2 ( 1-m_\ell^2/m_\pi^2 ) $
Delta E sub zero.	$ { \Delta } E_0 $
delta E.	$ \Delta E $
Delta epsilon sub zero	$ \Delta \varepsilon_0 $
Delta equals b minus a.	$ \Delta = b - a $
Delta equals one-half.	$ \delta=1/2 $
Delta equals three.	$ \Delta=3 $
Delta equals two.	$ \Delta=2 $
Delta equals zero point five.	$ \delta=0.5 $
Delta equals zero.	$ \Delta = 0 $
delta equals zero.	$ \delta=0 $
Delta f of E equals one.	$ \Delta f ( E ) = 1 $
delta f over f	$ \delta f/f $
Delta F sub Q Q equals negative log Z sub Q Q.	$ \Delta F_ { \QQ } =-\log Z_ { \QQ } $
delta f.	$ \delta f $
Delta H	$ \Delta H $
Delta H double dagger.	$ \Delta H^ { \ddagger } $
Delta h sub 2.	$ \Delta h_2 $
Delta hat phi.	$ \delta\hat\ { \phi $
delta i.	$ \Delta_i $
Delta is greater than zero.	$ \delta > 0 $
Delta is less than ten to the power of negative eight.	$ \Delta < 10^ { -8 } $
Delta j	$ \Delta_j $
delta j.	$ \delta_j $
Delta k equals k sub s minus k sub c.	$ \Delta \vec { k } = \vec { k } _s - \vec { k } _c $
delta k sub x.	$ \delta k_x $
delta lambda sub s.	$ \delta\lambda_s $
delta lambda subscript U	$ \delta \lambda_ { U } $
Delta less than or approximately equal to 1.1.	$ \Delta \lesssim 1.1 $
Delta m squared sub 21	$ \Delta m^2_ { 21 } $
Delta m.	$ \delta m $
delta m.	$ \delta_m $
Delta minus R sub H	$ \Delta-R_H $
delta mu	$ \Delta\mu $
Delta mu.	$ \Delta \mu $
Delta N sub eff.	$ \Delta N_ { \rm eff } $
Delta n superscript u, open parenthesis x comma zero, close parenthesis.	$ \delta n^ { \textsf { ( u ) } } ( \bm { x } ,0 ) $
Delta nu.	$ \Delta \nu $
delta of dot.	$ \Delta ( \cdot ) $
Delta of H is isomorphic to K.	$ \Delta ( H ) \cong K $
Delta of M superscript sigma subscript xi, comma, h subscript xi superscript sigma.	$ \delta ( M^ { \sigma } _ { \xi } , h_ { \xi^ { \sigma } } ) $
Delta of omega.	$ \Delta ( \omega ) $
Delta of R sub B is less than or equal to 5 eta to the power of one-half n.	$ \Delta ( R_B ) \le 5\eta^ { 1/2 } n $
delta of r.	$ \Delta ( r ) $
Delta of t equals zero.	$ \Delta ( t ) =0 $
delta of t.	$ \delta ( t ) $
delta of x is greater than zero.	$ \delta ( x ) > 0 $
delta of x.	$ \delta ( x ) $
Delta Omega sub 90 percent less than 10.	$ \Delta\Omega_ { { \rm 90 } \ % } < 10 $
delta omega.	$ \delta_\omega $
delta one is greater than zero.	$ \delta_1 > 0 $
delta one, t, C.	$ ( \delta_ { 1 } , t , C ) $
delta one.	$ \delta_1 $
Delta one.	$ \Delta_1 $
Delta p modulo alpha divided by 2.	$ \delta_p~\mathrm { mod } ~\alpha/2 $
Delta phi.	$ \Delta \varphi $
Delta plus or minus b times H.	$ \Delta\pmb { H } $
Delta psi.	$ \Delta \psi $
Delta rho divided by rho sub zero.	$ \delta \rho / \rho_0 $
Delta s equals lambda divided by 6, Delta r equals lambda divided by 3.	$ \Delta_s = { \lambda } / { 6 } , \Delta_r = { \lambda } / { 3 } $
Delta S greater than zero.	$ \Delta SE > 0 $
Delta s.	$ \Delta_s $
Delta sub 14.	$ \delta_ { 14 } $
Delta sub C P.	$ \delta_ { CP } $
Delta sub i equals the set of I, in parentheses, rho sub i less than or equal to t prime sub alpha.	$ \delta_i=\mathbb { I } ( \rho_i\leq t ' _\alpha ) $
delta sub i greater than 1.	$ \delta_ { i } > 1 $
delta sub i j.	$ \delta_ { ij } $
Delta sub j superscript round.	$ \DDelta_ { j } ^ { \round } $
Delta sub K	$ \Delta_ { K } $
Delta sub k superscript mu nu.	$ \Delta_ { ( k ) } ^ { \mu\nu } $
delta sub k tends to zero.	$ \delta_k \to 0 $
Delta sub o.	$ \delta_o $
delta sub p u	$ \Delta_p u $
delta sub t open parenthesis zero close parenthesis	$ \delta_t ( 0 ) $
Delta sub theta sub one.	$ \Delta_ { \theta_1 } $
Delta sub u lambda comma mu, open parenthesis g close parenthesis equals zero.	$ \Delta_ { u\lambda , \mu } ( g ) = 0 $
Delta sub xy.	$ \Delta_ { xy } $
Delta sub zero is greater than zero.	$ \delta_0 > 0 $
Delta sub zero.	$ \Delta_0 $
delta superscript x.	$ \delta^x $
delta T	$ \Delta T. $
Delta t	$ \Delta_t $
Delta t equals ten to the power of negative three.	$ \Delta t=10^ { -3 } $
Delta t equals ten.	$ \Delta t = 10 $
Delta t equals zero point two five.	$ \Delta t=0.25 $
Delta T is approximately equal to T sub K.	$ \Delta T \approx T_K $
Delta t to the power of n.	$ \Delta t^n $
Delta t.	$ \Delta t $
delta t.	$ dt $
Delta tends to zero.	$ \Delta \to 0 $
Delta theta.	$ \Delta\theta $
Delta tilde Lambda approximately 50.	$ \Delta \tilde \Lambda \approx 50 $
Delta times Z squared.	$ \delta\cdot \Z^2 $
delta u, delta s, delta xi, delta c.	$ ( \delta\bu , \delta\bs , \delta\xi , \delta c ) $
delta U.	$ \delta U $
Delta V	$ \Delta V $
Delta v sub 90.	$ \Delta v_ { 90 } $
delta W.	$ \delta W $
Delta x sub j.	$ \Delta x_j $
Delta x tends to zero.	$ \Delta x\to 0 $
Delta x.	$ \Delta x $
Delta y.	$ \delta_y $
Delta z	$ \Delta z $
Delta z equals z sub Phion minus one.	$ \delta z = z_ { \rm Phonon } - 1 $
Delta zero.	$ \delta_0 $
Delta.	$ \Delta $
delta.	$ \delta $
Depending only on None.	$ depending only on $
DiagTSi minus WP zero b of phi tau	$ \DiagTSimp { \bwp { 0 } { b } } { \varphi } { \tau } $
Diff of M and E	$ { \rm Diff } ( M , E ) $
different from	$ is different from $
dimension of X equals d.	$ \dim X=d $
Dimension of X is greater than or equal to dimension of Z sub W, which is greater than or equal to 2.	$ \dim ( \mathcal { X } ) \geq \dim ( \mathcal { Z } _ { W } ) \geq 2 $
Dir sub G.	$ \operatorname { Dir } _G $
dist of the boundary of U, imaginary part of u of T sub n, greater than or equal to M, greater than zero.	$ $ { \rm dist } ( \partial U , { \rm Im } u ( T_n ) ) \geq M > 0 . $ $
DK	$ DK $
dot	$ . $
dot alpha to the power of n	$ \dot { \alpha } ^ { ( n ) } $
dot it is preferable to work.	$ . It is preferable to work with $
dot log n.	$ \cdot \log n $
dot nine one	$ .91 $
dot vector	$ . Vector $
Dot, closing parenthesis, somma, ref 4.2, for.	$ . ) So by Lemma \ref { 4.2 } , for $
double dot o	$ \ddot { o } $
double greater than V.	$ \gg_ { V } $
Double prime.	$ D '' $
double radians.	$ \\ \midrule $
double vertical bars dot double vertical bars.	$ || \cdot || $
Double-struck H	$ \ { \vmathbb\ H $
double-u	$ \mathcal { W } $
DP: None	$ DP $
dz: None	$ dz $
e	$ e $
E	$ E $
E approximately greater than or equal to 100.	$ E \gtrsim 100 $
E approximately less than or equal to M sub W equals 80.4.	$ E \lesssim M_W = 80.4 $
E bar sub ell plus or minus	$ \bar E_ { \ell\pm } $
e bar.	$ \bar { e } $
e belongs to E prime.	$ e \in E ' $
e belongs to E.	$ e \in E $
e belongs to the set E of G.	$ e\in E ( G ) $
e belongs to the set of all elements in alpha.	$ e\in \Edge ( \alpha ) $
E bend.	$ \mathcal { E } _\text { bend } $
E bold.	$ \mathbf { E } $
e bold.	$ \mathbf { e } $
e double prime.	$ e '' $
E E worst, c, star	$ \operatorname { EE } _ { \text { worst } } ^ { \text { c } , \star } $
E equals 3.5	$ E=3.5 $
E equals H plus the gradient of x times V sub f equals zero.	$ E=H+\nabla_xV_f=0 $
E equals the set of real numbers raised to the power of p.	$ E=\mathbb { R } ^p $
e equals zero point zero.	$ e=0.0 $
E equals zero.	$ E=0 $
E evaluated at k	$ E ( k ) $
E evaluated at P.	$ E ( P ) $
e goes to zero.	$ \e\to 0 $
e hat sub f	$ \hat { e } _f $
E is a subset of the set of real numbers raised to the power of d.	$ E\subset\mathbb\ { R^d $
E is defined as A set minus C.	$ E : = A\setminus C $
e minus S t	$ e-St $
e mu (None)	$ e\mu $
E of eta, phi, equals cosine phi, e to the power of negative V of eta.	$ E ( \eta , \phi ) = \cos\phi e^ { -V ( \eta ) } $
E of n.	$ E ( n ) $
E of t.	$ E ( t ) $
e of u	$ e ( u ) $
E of X equals E prime of X divided by Pr to the power of a.	$ E [ X ] =E^ { \prime } [ X ] / \operatorname { Pr } ^ { a } $
E one equals E two equals E.	$ E_1=E_2=E $
e p	$ ep $
E plus.	$ E_+ $
e prime of r sub tilde equals e of r sub tilde	$ e ' ( [ r ] _\sim ) = [ e ( r ) ] _\sim $
E prime.	$ E ' $
e raised to the power of 2t times f bar of t, s, u.	$ e^ { 2t } \bar { f } ( t , s , u ) $
e raised to the power of j sub p.	$ \eP^ { j } _p $
e raised to the power of positive e raised to the power of negative.	$ e^ { + } e^ { - } $
E squared.	$ \mathcal { E } ^2 $
e sub 1	$ [ e_1 ] $
e sub 1 of y, dot dot dot, e sub k of y.	$ \left ( e_1 ( y ) , \ldots , e_k ( y ) \right ) $
E sub 1.	$ E_1 $
e sub 2	$ e_ { 2 } $
e sub 2 equals the set of v, b, v prime, b prime.	$ e_2 = \ { ( v , b ) , ( v ' , b ' ) \ } $
E sub 2.	$ \mathcal { E } _2 $
E sub a is greater than or equal to 1.5 minus 1.7 times m sub a.	$ E_a \gtrsim 1.5-1.7m_a $
E sub beta equals p times c.	$ E_\beta=p \ c $
E sub C of S of v	$ E_C ( S ( v ) ) $
E sub e star.	$ \mc { E } _e^\ast $
E sub F	$ E_F $
E sub f	$ E_f $
E sub F equals zero.	$ E_F=0 $
E sub F.	$ E_\text { F } $
E sub f.	$ E_ { f } $
E sub g	$ E_g $
e sub i is equivalent to e sub i (tau sub uv)	$ e_i\equiv e_i ( \tau_ { \rm uv } ) $
e sub i j.	$ e_ { ij } $
E sub i j.	$ E_ { ij } $
e sub i of Q	$ \e_i ( Q ) $
e sub i, h sub i, f sub i	$ e_i , h_i , f_i $
e sub i.	$ e_i $
E sub i.	$ E_i $
E sub infinity.	$ E_ { \infty } $
E sub j comma i.	$ E_ { j , i } $
E sub K is approximately equal to A sub G sub K over k.	$ E_ { K } \sim \mathcal { A } _ { G_ { K/k } } $
e sub k prime	$ e_k ' $
e sub k.	$ e_ { k } $
E sub m.	$ \E_m $
E sub melt equals 1.9640 gigaelectron volts.	$ E_ { melt } =1.9640\ , \mathrm { GeV } $
E sub mol equals 2 absolute value of mu.	$ E_ { \rm mol } =2|\mu| $
E sub n.	$ E_n $
E sub negative one.	$ E_ { -1 } $
E sub nu superscript 0 is approximately equal to 3.15 T sub nu superscript 0 is approximately equal to 6.1 K.	$ E_\nu^0 \simeq 3.15 T_\nu^0 \simeq 6.1\ { \rm K } $
E sub Q, E sub P.	$ \E_ { \Q } , \E_ { \P } $
e sub r.	$ e_r $
e sub s.	$ e_s $
E sub T arrow F	$ E_T\rightarrow F $
E sub X.	$ E_X $
E sub y of x, t	$ E_y ( x , t ) $
E sub zero comma two.	$ \varE_ { 0,2 } $
E sub zero goes to infinity.	$ E_0 \to \infty $
e sub zero squared times a sub l squared times J squared divided by h-bar squared.	$ e_0^2a_l^2J^2/\hbar^2 $
E subscript 11	$ E_ { 11 } $
E subscript a.	$ E_a $
e subscript k.	$ e_k $
E subscript p.	$ \mathcal { E } _p $
E subscript v.	$ E_v $
E T raised to the power of 3 minus 1.	$ { ATE } ^ { 3-1 } $
e times open parenthesis one minus e close parenthesis.	$ e ( 1-e ) $
E times R is less than or approximately equal to v.	$ \Eabs R \lesssim v $
e to the power of 6 Delta N is approximately equal to e to the power of 180.	$ e^ { 6 \Delta N } \sim e^ { 180 } $
e to the power of i k s.	$ e^ { iks } $
e to the power of negative a nu omega equals r omega.	$ \textup { e } ^ { -a\nu_ { \omega } } =r_ { \omega } $
e to the power of negative p to the power of 2 divided by Lambda squared.	$ e^ { -p^2/\Lambda^2 } $
E to the power of tau.	$ E^\tau $
E zero.	$ E_0 $
E-hat.	$ \hat E $
E. None	$ _E $
ee X	$ EX $
eff equals bee over sigma.	$ \fb=Bb/\sigma $
eff open parenthesis epsilon minus mu close parenthesis	$ f ( \epsilon-\mu ) $
eff sub i of z	$ f_i ( z ) $
eff sub N T	$ F_ { NL } $
eff sub n.	$ \Fl_n $
eff sub.	$ _ { \rm eff } $
eight	$ 8 $
Eight pi.	$ 8\pi $
eight point four five.	$ 8.45 $
eight point three four.	$ 8.34 $
Eight thousand.	$ 8000 $
eight times capital I.	$ 8I $
Eighteen point zero.	$ 18.0 $
Eighteen.	$ 18 $
Eighty-four raised to the power of None.	$ ^\textrm { \scriptsize 84 } $
Eighty-four.	$ 84 $
eighty-nine point seven seven	$ 89.78 $
Eighty.	$ 80 $
Eleven inches.	$ 11 '' $
Eleven percent.	$ 11\ % $
eleven point eight to the power of plus or minus zero point one zero.	$ 11.08^ { \pm0.10 } $
Eleven point nine.	$ 11.9 $
Eleven to the power of eleven.	$ ^ { 11 } $
Eleven.	$ 11 $
ell	$ \mathcal { L } $
ell equals th times v	$ \ell=\thv $
ell infinity.	$ \ell_\infty $
ell is greater than or equal to one.	$ \ell \ge 1 $
ell is greater than or equal to zero.	$ \ell \geq 0 $
ell is less than zero.	$ \ell < 0 $
ell minus	$ \ell_- $
ell minus one.	$ \ell - 1 $
ell plus one.	$ \ell+1 $
ell sub 2.	$ \ell_2 $
ell sub a.	$ \ell_a $
ell sub infinity.	$ \ell_ { \infty } $
ell sub j.	$ \ell_j $
ell sub one.	$ \ell_1 $
ell sub zero, y sub j	$ \ell_ { 0 , y_j } $
ell sub zero.	$ \ell_0 $
ell, em, en	$ ( \ell ; m ; n ) $
em open parenthesis tau bar tau close parenthesis	$ m ( \tau\bar { \tau } ) $
Empty set.	$ \emptyset $
Entity Class.	$ Entity Class $
ep, dcrit plus 2, beta.	$ \ep { \dcrit+2 } { \beta } $
Epsilon B.	$ \epsilon_B $
Epsilon belongs to the open interval from zero to epsilon sub-zero.	$ \eps \in ( 0 , \eps_0 ) $
Epsilon belongs to the open interval from zero to one.	$ \varepsilon\in ( 0,1 ) $
Epsilon equals e sub max.	$ \epsilon=\e_ { max } $
Epsilon equals zero point one.	$ \epsilon = 0.1 $
Epsilon equals zero.	$ \epsilon=0 $
epsilon i is greater than zero.	$ \epsilon_i > 0 $
Epsilon is greater than or equal to zero.	$ \epsilon \geq 0 $
Epsilon is greater than zero.	$ \varepsilon > 0 $
epsilon is greater than zero.	$ \ep > 0 $
Epsilon is less than epsilon sub zero.	$ \eps < \eps_0 $
Epsilon is similar to 0.1.	$ \epsilon \ ! \sim\ ! 0.1 $
epsilon n	$ \varepsilon n $
epsilon of k is less than or equal to 2.	$ \epsilon ( k ) \leq 2 $
Epsilon of q is greater than zero.	$ \epsilon ( q ) > 0 $
Epsilon of T is greater than zero.	$ \epsilon ( T ) > 0 $
Epsilon of X, t equals square root of one minus e to the negative t times S of X, t.	$ \epsilon ( X , t ) =\sqrt { 1-e^ { -t } } S ( X , t ) $
Epsilon one is greater than zero.	$ \varepsilon_1 > 0 $
epsilon over 2	$ \frac { \varepsilon } { 2 } $
Epsilon prime is greater than zero.	$ \epsilon ' > 0 $
Epsilon prime.	$ \epsilon ' $
epsilon star greater than zero.	$ \eps^ * > 0 $
epsilon Stop C V	$ \EarlyStopCV $
Epsilon sub 2.	$ \eps_2 $
Epsilon sub f f.	$ \epsilon_\mathrm { ff } $
Epsilon sub F.	$ \epsilon_ { F } $
Epsilon sub gamma.	$ \epsilon_\gamma $
epsilon sub i j.	$ \epsilon_ { ij } $
epsilon sub i.	$ \eps_i $
epsilon sub j decreases to zero.	$ \epsilon_j\searrow 0 $
epsilon sub k.	$ \underline { \eps } _k $
Epsilon sub one.	$ \epsilon_1 $
Epsilon sub V maps from V to K.	$ \epsilon_V : V\longrightarrow \K $
epsilon sub zero equals zero.	$ \epsilon_n=0 $
Epsilon sub-zero is greater than zero.	$ \eps_0 > 0 $
epsilon tends to zero.	$ \epsilon \to 0 $
Epsilon tends to zero.	$ \eps \rightarrow 0 $
epsilon tilde.	$ \tilde { \varepsilon } $
epsilon to the power of negative one.	$ \varepsilon^ { -1 } $
Epsilon to the power of negative one.	$ \epsilon^ { -1 } $
epsilon, delta.	$ ( \varepsilon , \delta ) $
epsilon.	$ \varepsilon $
Epsilon.	$ \epsilon. $
eqn:embed,	$ ( \ref { eqn : embed } ) $
equals	$ = $
error is less than 0.1.	$ error < 0.1 $
ES (None)	$ ES $
ess	$ \mathcal { S } $
ess backslash R sub em open parenthesis ess close parenthesis	$ s \R_m ( s ) $
ess you two.	$ \mathfrak { su } ( 2 ) $
ess-ah	$ sa $
ess-bar	$ \sigma , \overline { \sigma } $
ess-tee	$ \sT $
ess-you N.	$ SU ( N ) $
Ess, Pi see, Mod, Int, St, k	$ \mathbb { S } [ \Pic ] \Mod ( \Spt ( \mathrm { St } _k ) ) $
Eta equals six.	$ \eta=6 $
eta in square brackets.	$ [ \eta ] $
Eta is less than one.	$ \eta < 1 $
Eta is less than or equal to one.	$ \eta\le 1 $
Eta of s prime is less than eta of s.	$ \eta ( s ' ) < \eta ( s ) ; $
Eta of t.	$ \eta ( t ) $
eta pi plus pi minus	$ \eta\pi^+\pi^- $
Eta prime to eta ell plus ell minus.	$ \eta ' \to \eta \ell^+ \ell^- $
Eta sub 2 equals eta sub 0 divided by 2.	$ \eta_ { 2 } =\frac { \eta_ { 0 } } { 2 } $
Eta sub 2.	$ \eta_2 $
eta sub alpha beta.	$ \eta_ { \alpha\beta } $
Eta sub cross is approximately zero point one one.	$ \eta_\text { cross } \approx 0.11 $
Eta sub i equals alpha sub i times e to the power of r sub i.	$ \eta_ { i } =\alpha_ { i } e^ { r_ { i } } $
eta sub i equals n.	$ \eta_i=n $
Eta sub i j.	$ \eta_ { ij } $
Eta sub mu sub A of X equals identity.	$ \eta_ { \mu_A ( X ) } =\id { } $
Eta sub n.	$ \eta_n $
Eta sub one-half equals eta sub zero.	$ \eta_ { \frac { 1 } { 2 } } = \eta_ { 0 } $
eta sub p.	$ \eta_p $
Eta sub r squared equals one.	$ \eta_r^2=1 $
eta sub R-S.	$ \eta_\ { \RR $
Eta sub Re of A is less than or equal to eta sub trace of A.	$ \eta_ { \ { \operatorname\ { Re } ( \cA ) \leq \eta_ { \tr } ( \cA ) $
Eta sub X.	$ \eta_X $
eta sub xi	$ \eta_\xi $
Eta sub zero equals zeta sub zero equals capital H sub l m of eta sub zero comma zeta sub zero equals zero.	$ \eta_0 = \zeta_0 = \hJ_ { lm } ( \eta_0 , \zeta_0 ) = 0 $
eta sub zero of N	$ \en_0 ( N ) $
Eta sub zero.	$ \eta_0 $
eta tends to zero.	$ \eta \to 0 $
Eta to the power of phi.	$ \eta^ { \phi } $
eta underline.	$ \underline { \eta } $
eta.	$ \eta $
ex	$ \mathbf x $
exponential of negative x	$ \displaystyle \frac { 1 } { 1 + \exp ( -x ) } $
Exponential of plus or minus i times 2 times phi.	$ \exp ( \pm i 2 \varphi ) $
Exponential of x times t times K of x, belongs to script H.	$ \exp_x ( tK ( x ) ) \in \mathcal H $
eye-dee	$ I ( D ) ^ { \vee } $
f	$ f $
F	$ F $
f belongs to B to the power of s sub p, infinity equals Lip of s, p.	$ f\in B^s_ { p , \infty } : =\text { Lip } ( s , p ) $
f belongs to C infinity of O semicolon W	$ f\in C^\infty ( O ; W ) $
f belongs to c times C infinity of R to the power of n.	$ f \in \cC^\infty ( \R^n ) $
f belongs to F	$ f \in F $
f belongs to L squared of Omega.	$ f\in L^2 ( \Omega ) $
f belongs to L to the power of 1 of Xi.	$ f \in L^1 ( \Xi ) $
f belongs to the set of homomorphisms from R-module V to R-module W.	$ f \in \Hom_R ( V , W ) $
f belongs to the set of QC, which is a function of R to the power of n.	$ f\in { \rm QC } ( \R^n ) $
f c.	$ f_c $
f colon A to A.	$ f : \A\to\A $
f colon M arrow M prime	$ f : M\longrightarrow M ' $
f colon N to the set of complex projective numbers sub n minus 1 of 1.	$ f : N\to \mathbb { P } _ { n-1 } ( 1 ) $
F colon Q equals 2.	$ [ F : \Q ] =2 $
f colon R squared to S squared	$ f\colon \R^2 \to \S^2 $
f dot	$ \dot { f } $
f equals G.	$ \mathfrak\ { f=\mathcal\ { G $
F equals one.	$ F=1 $
F F prime	$ \FF ' $
f greater than 2 times eps	$ f > 2\eps $
f greater than or equal to zero	$ f\ge 0 $
f hat.	$ \hat f $
f intersection Z	$ \mathfrak { f } \cap \Z $
f inverse of B delta	$ f^ { -1 } ( B_\delta ) $
f inverse of Y sub s	$ f^ { -1 } ( Y_ { \mathrm\ s } ) $
f maps A to B	$ f : A \rightarrow B $
f maps from C to D.	$ f : C \to D $
f maps from the set of real numbers to the set of real numbers.	$ f : \mathbb { R } \to \mathbb { R } $
f maps G to H	$ f\colon G\to H $
f maps P to the interval from zero to infinity.	$ f : P \to [ 0 , \infty ) $
f maps S to S prime	$ f : S \to S ' $
f maps S to T.	$ f\colon S\to T $
f maps Spec A to Spec K.	$ f\colon \Spec A\to \Spec K $
f maps the set of vertices of graph G to the set of real numbers.	$ f : V ( G ) \to R $
f maps X to Y	$ f : X\to Y $
f maps Y to X.	$ f\colon Y\to X $
f minus one divided by two	$ ( f-1 ) /2 $
f n	$ fn $
f naught.	$ f_o $
f of 1 equals tau of rho.	$ f ( 1 ) =\tau ( \rho ) $
f of A	$ f ( A ) $
f of A times x belongs to the RR of x sub 1, dot dot dot, x sub m.	$ f ( Ax ) \in \RR [ x_1 , \ldots , x_m ] $
F of A, times the quantity bi A minus bi I.	$ F ( A ) ( \mathsfbi { A } -\mathsfbi { I } ) $
f of alpha	$ f ( \alpha ) $
f of dot, bm theta	$ f ( \cdot , \bm { \theta } ) $
f of dot.	$ f ( \cdot ) $
F of dot.	$ F ( \cdot ) $
F of f composed with pi sub 1 composed with r composed with pi sub 1 composed with w.	$ F ( f\circ\pi_1\circ r ) \circ\pi_1\circ w $
f of F intersect C belongs to script Y	$ f ( F ) \cap C \in \mathcal { Y } $
F of f.	$ F ( f ) $
f of G	$ f ( G ) $
f of Gamma	$ f ( \Gamma ) $
f of gamma	$ f ( \gamma ) $
f of i	$ f ( i ) $
f of I sub R	$ f ( I_R ) $
f of k	$ f ( k ) $
F of l	$ F ( l ) $
f of nu	$ f ( \nu ) $
f of omega	$ f ( \omega ) $
f of pi	$ f ( \pi ) $
f of Q	$ f ( Q ) $
f of R	$ f ( R ) $
F of r.	$ F ( r ) $
F of R.	$ F ( R ) $
f of rho	$ f ( \rho ) $
F of S b, Sc equals S squared C equals m minus 1.	$ F ( Sb , Sc ) =S^2C=m-1 $
F of the absolute value of u sub n times the quantity dot plus a sub n, all squared, is less than or equal to h, a.e.	$ $ F\big ( |u_n ( .+a_n ) |^2\big ) \leq h\quad\text { a.e . } , $ $
f of v	$ f ( v ) $
f of v equals one	$ f ( v ) =1 $
f of x	$ f ( x ) $
f of x comma y	$ f ( x , y ) $
f of x equals one divided by one minus x	$ f ( x ) =1/ ( 1-x ) $
f of x equals zero.	$ f ( x ) =0 $
f of X tilde sub 0	$ f ( \widetilde { X } _0 ) $
F of X, Y, Z.	$ F ( X , Y , Z ) $
F of x.	$ F ( x ) $
F of X.	$ F ( X ) $
F of Y	$ \mathcal { F } ( \mathcal { Y } ) $
f of y	$ f ( y ) $
f of y transpose minus f of x star greater than or equal to zero	$ f ( y^ { T } ) -f ( x^ * ) \geq 0 $
F of y.	$ F ( y ) $
f of z approaches infinity	$ f ( z ) \to \infty $
f of z.	$ f ( z ) $
F one score	$ F1 score $
f prime	$ f ' $
f prime circle pi equals f.	$ f'\circ \pi=f $
F prime.	$ F ' $
f r.	$ f_r $
F raised to the mu nu.	$ F^ { \mu\nu } $
F raised to the power of 0 equals infinity.	$ { F^ { \left ( 0 \right ) } } = \infty $
f raised to the power of 0.	$ f^0 $
F raised to the power of k, sub R raised to the power of n.	$ \F^k_ { \R^n } $
F raised to the power of v.	$ F^v $
F raised to the power of zero.	$ \mathbb F ^0 $
f star	$ f^ * $
f star sub 2UFS	$ f^ * _ { 2UFS } $
f sub 0	$ f_ { 0 } $
F sub 1 intersection C equals x sub 1 x sub 2 x sub 3.	$ F_1\cap C=x_1x_2x_3 $
F sub 1 minus F sub 2.	$ F_1 - F_2 $
f sub 1, f sub 2, dot dot dot, f sub n	$ f_1 , f_2 , \dots , f_n $
F sub 1.	$ F_ { 1 } $
F sub 11.	$ F_ { 11 } $
f sub 2 belongs to the boundary of E sub o of T	$ f_2\in \partial E_o ( \mathcal { T } ) $
F sub 2 to the power of r	$ \mathbb { F } _ { 2^r } $
f sub 2.	$ f_2 $
F sub 2.	$ F_2 $
F sub 24.	$ F_ { 24 } $
F sub 3 open parenthesis 0 close parenthesis equals 0.	$ F_ { 3 } ( 0 ) =0 $
F sub 4.	$ F_4 $
f sub A	$ f_A $
F sub A comma B superscript C.	$ F_ { A , B } { } ^ { C } $
F sub a equals 1.92 alpha sub EM divided by 2 pi g sub theta gamma.	$ F_a = 1.92 \alpha_ { \rm EM } / ( 2 \pi g_ { \theta\gamma } ) $
f sub a.	$ f_a $
f sub alpha	$ f_\alpha $
F sub b I	$ F_ { \bd I } $
f sub C N M	$ f_ { \mathrm { CNM } } $
f sub c.	$ f_ { c } $
f sub D M equals one over T sub p.	$ f_ { DM } =1/T_p $
F sub D.	$ F_D $
f sub delta equals f times Psi superscript delta	$ f_\delta = f * \Psi^\delta $
f sub delta superscript k prime of phi delta of s	$ ( f_\de^k ) ' ( \vp_\de ( s ) ) $
f sub E sub p open parenthesis 0 close parenthesis not equal to 0	$ f_ { E_ { ( p ) } } ( 0 ) \neq 0 $
F sub ell of r	$ F_ { \ell } ( r ) $
F sub f of c sub k, l of f	$ \mathcal F_f ( c_ { k , l } ( f ) ) $
F sub g, t, delta superscript nev	$ F_ { g , t , \delta } ^ { \nev } $
F sub i	$ F_i $
F sub i comma i equals delta sub 0.	$ F_ { i , i } = \delta_0 $
f sub i superscript e q	$ f_i^ { \rm eq } $
f sub i, set of real numbers raised to the power of d, maps to set of real numbers raised to the power of n.	$ f_i : \ { \mathbb\ { R^d \to\ { \mathbb\ { R^n $
f sub i: R to the power of d, right arrow R to the power of d.	$ f_i : \mathbb { R } ^ { d } \rightarrow \mathbb { R } ^ { d } $
f sub i.	$ f_i $
F sub i.	$ \mathcal { F } _i $
f sub id equals double vertical bar u sub id double vertical bar.	$ f_ { id } = \Vert u_ { id } \Vert $
F sub int negative b g	$ F_ { \rm int-bg } $
f sub J	$ f_J $
F sub j from j equals 0 to J, belonging to the set B of H.	$ \ { F_j\ } _ { j=0 } ^J\in\mc { B } ( \mc { H } ) $
F sub j.	$ \F_j $
F sub k ell open parenthesis tau, m sub t, Q close parenthesis.	$ F_ { k\ell } ( \tau , m_t , Q ) $
F sub k of w	$ F_k ( { \bf w } ) $
f sub k.	$ f_k $
F sub k.	$ \mathcal { F } _k $
f sub kappa comma i	$ f_ { \kappa , i } $
f sub L	$ f_L $
F sub l	$ F_l $
f sub l of x sub l	$ f_l ( \mathbf { x } _l ) $
f sub lambda, colon, Xi raised to zero, right arrow, R plus	$ f_ { \lambda } : \Xi^0 \rightarrow \mathbb { R } _+ $
F sub M.	$ F_M $
f sub N L.	$ f_\ { _\ { \rm\ NL $
F sub n s comma t	$ F_n ( s , t ) $
f sub n.	$ f_n $
F sub n.	$ \cF_n $
f sub obs	$ f_ { \rm obs } $
F sub one comma two.	$ F_ { 1,2 } $
f sub one.	$ f_1 $
f sub p	$ f_p $
F sub p c.	$ F_ { pc } $
f sub p sub bold in is not equal to zero.	$ f_ { p_ { \bf in } } \neq 0 $
f sub p, ex	$ f_ { p , ex } $
F sub p.	$ \F_p $
f sub p.	$ \mathit { f } _p $
f sub phi equals 0.129576	$ f_\phi = 0.129576 $
F sub phi.	$ F_ { \phi } $
f sub plus	$ f_ { + } $
F sub q.	$ \F_q $
f sub s eta	$ f_ { \rm s\eta } $
F sub s.	$ F_ { s } $
F sub S.	$ F_S $
F sub Sigma to the power of c, beta	$ \mathscr F_ { \Sigma^c , \beta } $
F sub ten point seven	$ F_ { 10.7 } $
f sub theta	$ f_ { \theta } $
f sub theta of x	$ f_ { \theta } ( x ) $
F sub Theta.	$ \mathcal { F } _\Theta $
F sub theta.	$ F_ { \theta } $
F sub x	$ F_x $
f sub x.	$ f_x $
F sub y.	$ F_y $
F sub z.	$ F_z $
F sub zero equals the line integral of Psi sub zero.	$ F_0=\Lapl\Psi_0 $
f sub zero.	$ f_0 $
F sub zero.	$ F_0 $
F subscript n.	$ F_n $
F superscript a subscript i j	$ F^a_ { ij } $
f tilde.	$ \tilde { f } $
F tilde.	$ \tilde { F } $
f times gr raised to the power of F sub p times c times M equals zero.	$ f\cdot \gr^F_p\cM=0 $
F times X minus D.	$ \atp { F } { X-D } $
f to the k-th derivative.	$ f^ { ( k ) } $
f to the power of negative four	$ f^ { -4 } $
F transpose sub i comma j	$ F^T_ { i , j } $
f u k raised to the power of tot	$ \fuk^ { \text { tot } } $
f-th-d1	$ \ref { mthd1 } $
f, colon, R to the power of n, arrow, R	$ f : \R^n\to \R $
F, G: None	$ F , G $
F, mu, eta.	$ ( F , \mu , \eta ) $
f, open bracket, omega, close bracket, squared, arrow, omega.	$ f : [ \omega ] ^2\to\omega $
f: Omega to the power of k, arrow Sigma to the power of k.	$ f : \Omega^ { k } \rightarrow \Sigma^ { k } $
Facet with subscript eta sub i.	$ \mathrm { Facet } _ { \eta_i } $
fifteen point four.	$ 15.4 $
Fifteen.	$ 15 $
Fifty percent.	$ 50\ % $
fifty point four five	$ 50.45 $
Fifty.	$ 50 $
five	$ 5 $
five hundred five hundred.	$ 5500 $
Five hundred sixty-seven.	$ 567 $
Five hundred thirty-two.	$ 532 $
Five hundred.	$ 500 $
Five over four.	$ \frac { 5 } { 4 } $
five over two minus.	$ 5/2- $
Five percent.	$ 5\ % $
five point one two.	$ 5.12 $
Five sigma.	$ 5\sigma $
Five thousand.	$ 5\,000 $
Five times ten to the power of negative four.	$ 5\cdot 10^ { -4 } $
five to the power of negative four	$ 5^ { -4 } $
Five to the power of th.	$ 5^ { th } $
Five-fold.	$ 5-fold $
Fix sub Aut sub G of T of R	$ \Fix_ { \Aut_G ( \mathcal { T } ) } ( \mathcal { R } ) $
floor of beta	$ \lfloor \beta \rfloor $
floor of star	$ \lfloor * \rfloor $
for a distribution.	$ for a distribution $
for a matrix	$ for its magnitude , and for a matrix $
For all bar q in C Q.	$ \forall \bar { \vec { q } } \in \C { Q } $
for all dimensions.	$ , with subspaces of all dimensions close to $
for all p greater than or equal to 1	$ \forall p \ge 1 $
For all q equals 1, dot dot dot, Q.	$ \forall q=1 , \ldots , Q $
For all s sub t in the set of p, C of o sub t, s sub t equals zero.	$ \forall s_t \in \mathbf { p } , C ( o_t , s_t ) =0 $
For all.	$ for all $
for different combinations of	$ for different combinations of $
For example by coloring in	$ , for example by coloring edges in $
For some	$ for some $
form.	$ \formalismname $
Fot to the power of one	$ \Fot^ { ( 1 ) } $
four	$ 4 $
Four degrees.	$ 4^\circ $
Four hundred.	$ 400 $
Four M.	$ 4M $
four minus epsilon.	$ 4-\epsilon $
Four thousand six hundred sixty.	$ 4660 $
Four times S.	$ 4S $
four two three point three	$ 4222.3 $
Fourteen plus or minus eighteen.	$ 414\pm18 $
Fourteen.	$ 14 $
Fraction d S sub T over d t greater than or equal to zero.	$ \frac { dS_ { T } } { dt } \geq 0 $
Fraction lambda squared over 1 plus lambda times b.	$ \frac { \lambda^2 } { 1+\lambda } b $
Fraction one over g mm of l m sub zero is much less than T is much less than one.	$ \frac { 1 } { \gmm ( \lmb_0 ) } \ll T \ll 1 $
Fraction one over n times T of G, n.	$ \frac { 1 } { n } \cdot T ( G , n ) $
Fraction three over q is greater than or equal to fraction two over p.	$ \frac { 3 } { q } \geq \frac { 2 } { p } $
Fraction two gamma beta divided by one minus gamma, norm of Q pi minus Q hat.	$ \frac { 2\gamma \beta } { 1-\gamma } \norminf { \Qpihat- \Qhatpihat } $
Fraction V S D minus t r c over sigma.	$ \frac { \mbox { SVD-trunc } } { \sigma } $
Fraction, 3 minus 3 times the square root of 3, divided by the square root of 6.	$ \frac { 3-3\sqrt { 3 } } { \sqrt { 6 } } $
Fraction, square root of 2, divided by 2, less than beta, less than 1.	$ \dfrac { \sqrt { 2 } } { 2 } < \beta < 1 $
Fun star, open parenthesis, xtop, comma, ytop, close parenthesis.	$ \fun^ * ( \xtop , \ytop ) $
G	$ G $
g	$ g $
G A.	$ G_A $
G B C superscript 2	$ \mathcal { G } _ { BC } ^ { ( 2 ) } $
G backslash partial E	$ G \curvearrowright \partial E $
g bar nu e	$ \tilde g_ { \bar\nu_e } $
G bar.	$ \overline G $
g bar.	$ \bar g $
g belongs to G	$ g\in G $
g belongs to G.	$ g \in G $
g belongs to K	$ g\in K $
g belongs to the domain of the function iota with a negative subscript.	$ g \in \dom \hat { \iota } _ { - } $
g belongs to the set E sub k G.	$ \mathbf { g } \in E_k G $
g belongs to the set G.	$ g\in\mathcal { G } $
g belongs to the set of functions that are continuously differentiable.	$ \bg\in \mathcal C^1 $
g belongs to V sub sigma, p	$ g\in V_ { \sigma , p } $
g circle a equals f	$ g\circ a=f $
g comma h	$ ( g , h ) $
G divided by H.	$ G/H $
G divided by K.	$ G/K $
G divided by the core of N infinity.	$ G/\mathrm { core } ( \mathcal { N } ^\infty ) $
g dot.	$ \dot { \g } $
g equals 2	$ g=2 $
G equals 20.	$ G=20 $
G equals open parenthesis V comma E close parenthesis.	$ G= ( V , E ) $
G equals the set of all K sub floor of n times T, greater than epsilon times the square root of n.	$ G = \ { |K_ { \lfloor nT \rfloor } | > \varepsilon \sqrt { n } \ } $
g equals zero.	$ g=0 $
G F of 3.	$ GF ( 3 ) , $
G F squared	$ \rm { UG^ { 2 } } $
G G.	$ \GGG $
G goes to G L of m comma R R	$ G \to \GL ( m , \RR ) $
g greater than or equal to 1	$ g\geq 1 $
G in calligraphic font.	$ \mathcal G $
g in Fraktur font.	$ \mathfrak { g } $
G intersection F	$ ( G\cap\mathcal F ) $
G is equal to open parenthesis V, comma E, close parenthesis.	$ G = ( V , E ) $
g is greater than zero.	$ g > 0 $
G L sub m in parentheses finite field.	$ \GL_m\left ( \finiteField\right ) $
g lambda	$ g_\lambda $
g minus one	$ g-1 $
G minus S.	$ G-S $
G mu nu.	$ \mathcal { G } _ { \mu \nu } $
g of a sub 1 equals 1	$ g ( \mathit { a } _1 ) = 1 $
g of c	$ g ( c ) $
g of c divided by p of c plus F greater than or equal to 1	$ g ( c ) / p ( c ) + \F \geq 1 $
G of Cbold	$ G ( \Cbold ) $
G of center dot.	$ \mathbf { G } ( \cdot ) $
g of dot.	$ g ( \cdot ) $
G of G	$ \mathcal { G } ( G ) $
g of Gamma is greater than 21	$ \g ( \Gamma ) > 21 $
g of N	$ g ( N ) $
g of r	$ g ( r ) $
g of t equals eta plus h of t.	$ g ( t ) =\eta+h ( t ) $
g of the set R.	$ g ( \mathcal { R } ) $
G of V, E.	$ G ( V , E ) $
g of x	$ g ( \bm x ) $
G of x equals zero.	$ G ( x ) =0 $
g of x.	$ g ( x ) $
G of Y	$ \mathcal { G } ( Y ) $
G one.	$ \mathcal { G } _1 $
g over L, dagger.	$ \rm { g/L } ) \dagger $
G plus or minus.	$ G^\pm $
g plus superscript plus	$ g^ { + } $
g prime	$ g^ { \prime } $
g prime comma g belongs to the set of objects in the category G.	$ g ' , g\in \Obj ( \mathcal { G } ) $
G prime over G.	$ G'/G $
G prime.	$ \mathcal { G } ' $
G raised to the power of D.	$ G^D $
g raised to the power of i.	$ g^i $
g raised to the power of t.	$ g^ { ( t ) } $
g S mu B	$ gS\mu_BB $
G script.	$ \mathscr { G } $
g star	$ g^ * $
G star star	$ \mathcal G^ { * * } $
G star.	$ G^ * $
G sub 0 to the power of three halves, open parenthesis, pi divided by 2, comma, C sub 1, close parenthesis.	$ G_0^ { 3/2 } ( \pi/2 , C_1 ) $
g sub 1	$ g_1 $
g sub 1 prime	$ g_1 ' $
G sub 2	$ G_ { 2 } $
g sub 2 of x	$ g_2 ( x ) $
g sub 2 raised to the power of M is less than i sub 1 raised to the power of m.	$ g_2^ { M } < i_1^ { m } $
G sub 2.	$ G_2 $
g sub 4.	$ g_4 $
G sub aco.	$ \bfG_ { aco } $
g sub alpha, tau.	$ g_ { \alpha , \tau } $
G sub B.	$ \bm { G } _B $
G sub C	$ G_C $
G sub F	$ G_F $
g sub i j equals beta sub i j square root of omega sub i omega sub j.	$ g_ { ij } = \beta_ { ij } \sqrt { \omega_i \omega_j } $
g sub i j.	$ g_ { ij } $
G sub i.	$ G_i $
g sub i.	$ g_i $
G sub j, G sub j plus 1	$ G_jG_ { j+1 } $
g sub k	$ g_k $
g sub k comma i	$ g_ { k , i } $
G sub k plus 1	$ \G_ { k+1 } $
G sub k.	$ G_k $
G sub K.	$ G_K $
g sub l	$ g_l $
G sub L of dot	$ \textit { G } _ { L } ( \cdot ) $
g sub m R sub E.	$ g_mR_E $
G sub M, open parenthesis, Q squared, close parenthesis.	$ G_M ( Q^2 ) $
g sub m.	$ g_m $
g sub mu nu.	$ g_ { \mu \nu } $
G sub n	$ G_n $
G sub n superscript e p s	$ G_n^ { \eps } $
g sub n.	$ g_ { n } $
G sub one.	$ G_1 $
G sub p	$ G_p $
g sub p.	$ g_p $
g sub phi	$ g_\phi $
G sub R.	$ G_R $
G sub S	$ G_S $
G sub t	$ G_t $
G sub t equals a sub t plus 1 divided by a sub t.	$ G_t=a_ { t+1 } /a_t $
g sub t x of t	$ g_ { \text { tx } } ( t ) $
G sub T.	$ G_T $
G sub V.	$ G_V $
g sub X	$ ( X , g_X ) $
g sub zero	$ g_0 $
g sub zero i	$ g_ { 0i } $
G sub zeta, h of r, w equals h of r, G sub zeta of w.	$ G_ { \zeta , h } ( r , w ) = h ( r ) G_\zeta ( w ) $
G subscript n.	$ G_ { n } $
g subscript n.	$ g_n $
g subscript r.	$ g_r $
G subscript S.	$ G_ { S } $
G subscript u d squared	$ G_ { ud } ^2 $
G tilde	$ \widetilde { G } $
g tilde.	$ \tilde { g } $
G to the power of negative.	$ G^- $
G zero.	$ G_0 $
G-hat.	$ \hat { \mathbf { G } } $
Gal of K of p to the power of n divided by K	$ \mathrm { Gal } ( K ( p^ { n } ) /K ) $
Gamma 2.	$ \Gamma_2 $
Gamma 7.	$ \Gamma_7 $
gamma bar.	$ \overline { \gamma } $
Gamma belongs to capital Gamma.	$ \gamma\in\Gamma $
Gamma belongs to the interval from 0 to 1, excluding 1.	$ \gamma \in [ 0 , 1 ) $
[truncated: 10,575 more rows]

## Sheet: Dimas
Произношение
hat beta sub j	$ \hat { \beta_j } $
The cardinality of the intersection of B and the set D is equal to zero.	$ |B \cap \mathcal { D } |=0 $
the complement of S minus S.	$ \overline { S } -S $
Delta, open parenthesis, i, vertical bar, X, close parenthesis.	$ \Delta ( i\mid X ) $
x sub 1, y sub 1, dot dot dot, x sub g, y sub g.	$ x_1 , y_1 , \dots , x_g , y_g $
N greater than or equal to N sub zero.	$ ( N\geq N_0 ) $
mu sub sigma, zero	$ \mu_ { \sigma,0 } $
The derivative of J is equal to the square root of one minus e squared.	$ J'=\sqrt { 1-e^2 } $
The bar g divided by omega zero is much less than z times t zero squared.	$ \bar { g } ^2/\omega_0 \ll z t_0^2 $
four hundred six hundred m squared.	$ 4650 m^ { 2 } $
L to the power of p sub x.	$ L^p_x $
s sub i comma i	$ s_ { i , i } $
X is approximately less than or equal to Y.	$ X \lesssim Y $
c equals r, dot dot dot, n	$ c = r , \ldots , n $
F of u equals alpha u	$ F ( u ) =\alpha u $
Twelve.	$ 12 $
f equals e to the power of negative x	$ f=\exp ( -x ) $
n equals tau plus one, dot dot dot, the minimum of k, comma, T plus tau minus one.	$ n=\tau+1 , \cdots , \min ( k , T+\tau-1 ) $
2967	$ 2967 $
Sigma of E sub 1.	$ \sigma ( E_1 ) $
L is a subset of X	$ L\subseteq X $
J belongs to the power set of K prime.	$ J \in P ( K ' ) $
E prime over k.	$ E'/k $
k sub s plus k sub n s equals k	$ k_s + k_ { ns } = k $
f of 2 cosine theta belongs to L squared of the interval 0 to pi.	$ f ( 2\cos\theta ) \in L^2 ( [ 0 , \pi ] ) $
u v sub i belongs to E of G	$ u v_i \in E ( G ) $
beta k greater than one.	$ \beta k > 1 $
n sub p m divided by tau sub l	$ \frac { n_ { pm } } { \tau_ { l } } $
A equals A of V equals k times the quantity V equals S of V star.	$ A=A ( V ) =k [ V ] =S ( V^ * ) $
12.2 plus or minus 2.6	$ 12.2 \pm 2.6 $
m is congruent to n, modulo 3.	$ m \equiv n\ , ( \text { mod } \,3 ) $
F equals alpha H plus beta K	$ F= \alpha H + \beta K $
b dagger b	$ b^\dagger b $
Delta phi to the power of j.	$ \delta\varphi^ { ( j ) } $
X sub negative s	$ X_ { -s } $
P to the power of x subscript a, comma, Q to the power of y subscript b.	$ P^x_a , Q^y_b $
0.479 plus or minus 0.005	$ 0.479\pm0.005 $
q-hat equals s.	$ \hat q=s $
Two point nine five minus three point one five n sub zero.	$ 2.95-3.15 ~n_0 $
f sub 0, colon V to T	$ f_0\colon V\to T $
g maps to T raised to the power of x sub g raised to the power of n	$ g\mapsto T^x_ { g^ { [ n ] } } $
E sub r plus 1 intersection U sub r equals the set of u sub 1 equals 0.	$ E_ { r+1 } \cap U_r=\ { u_1=0\ } $
F sub label equals open square bracket negative one, comma zero point one, comma zero point five close square bracket.	$ F_ { label } = [ -1,0.1 , 0.5 ] $
m sub phi equals 100	$ m_\phi = 100 $
H equals the partial derivative with respect to t plus L.	$ \mathcal { H } =\partial_t+\mathcal { L } $
71.60 plus or minus 5.16.	$ 71.60\pm 5.16 $
Y squared minus 4kX is less than zero.	$ Y^2-4kX < 0 $
eff open parenthesis q comma t close parenthesis	$ f ( q , t ) $
u sub 3 prime of ell equals 0	$ u_3 ' ( \ell ) =0 $
q: G over phi to R	$ q : G/\varphi\to R $
one point three two plus or minus zero point zero five.	$ 1.32 \pm 0.05 $
mu sub 0, mu sub 1, mu sub 2	$ \ { \mu_ { 0 } , \mu_ { 1 } , \mu_ { 2 } \ } $
set ( K, J, g, L )	$ ( K , J , g , L ) $
v sub i equals y.	$ v_i=y $
U sub cost of beta sub i.	$ U_ { cost } ( \beta_i ) $
Omega, open square bracket, script N, n sub z, Lambda, close square bracket.	$ \Omega [ \mathcal { N } n_ { z } \Lambda ] $
r sub zero equals fifty.	$ r_0=50\ , $
j sub h-o, with h-o equals 1, to the power of M.	$ \ { j_ { h_o } \ } _ { h_o=1 } ^M $
negative four point six two three three	$ -4.6237 $
A is successor of B which is successor of C	$ A\succ B \succ C $
L squared of z sub 0, z sub 1.	$ L^2 ( z_0 , z_1 ) $
b is equivalent to b inverse	$ b \leftrightarrow b^ { -1 } $
g sub i of x equals the norm of x minus x bar sub i squared.	$ g_i ( x ) = \|x - \bar { x } _i\|^2 $
Lambda equals mu equals ten to the power of omega sub 2.	$ \lambda = \mu = 10^ { \omega_2 } $
0 is less than or equal to lambda which is less than or equal to 1.	$ 0 < = \lambda < = 1 $
z goes to w	$ z \rightarrow w $
B belongs to the power set of W.	$ B \in \mathcal { P } ( W ) $
X raised to the power of star, comma, Y raised to the power of star.	$ ( X^ * , Y^ * ) $
open parenthesis V comma W comma u close parenthesis	$ ( V , W , u ) $
Open brace, zero point zero five, comma, zero point five, comma, zero point seven five, close brace.	$ \ { 0.05 , 0.1 , 0.25 , 0.75\ } $
G sub delta equals F delta F star.	$ G_\Delta=F\Delta F^\ast $
z belongs to the set of V tilde of x.	$ z \in \widetilde { V } ( x ) $
D epsilon of omega to the power of j.	$ D_\epsilon ( \omega^j ) $
S sub 1 equals S sub 0 times e raised to the power of G minus L.	$ S_1=S_0e^ { G-L } $
tilde L sub j prime	$ \widetilde { L } _j ' $
1.884 plus or minus 0.013.	$ 1.884\pm.013 $
4.21 plus or minus 0.43	$ 4.21 \pm 0.43 $
chi of T squared.	$ \chi ( T^2 ) $
T equals T of B, omega, greater than zero.	$ T=T ( B , \omega ) > 0 $
polynomial.	$ \text{polynomial}$
a sub k of xi	$ a_k ( \xi ) $
b, g	$ ( b , g ) $
z sub 1, ellipsis, z sub J	$ z_1 , \ldots , z_J $
V sub mu tau equals 10 to the power of negative 5 times V sub e.	$ V_ { \mu\tau } = 10^ { -5 } V_e $
a equals 30 times M	$ a=30 M $
W prime quantity greater than or equal to negative c.	$ W '' \geq -c $
(176, 256, 150)	$ ( 176,256,150 ) $
4.76 plus or minus 0.34	$ 4.76\pm0.34 $
B to the power of 0, arrow, K to the power of star 0, ell to the power of plus ell to the power of negative.	$ B^0 \to K^ { * 0 } \ell^+\ell^- $
u minus v less than v less than u plus	$ u_- < v < u_+ $
nu equals zero.	$ ( \nu = 0 ) $
Pi hat equals Pi direct sum one minus Pi.	$ \widehat \Pi = \Pi \oplus ( 1-\Pi ) $
C equals C open parenthesis epsilon comma a close parenthesis.	$ C=C ( \epsilon , a ) . $
z equals x plus y times i.	$ z = x + yi $
Omega sub R comma zero equals omega sub phi.	$ \Omega_ { R,0 } = \omega_ { \varphi } $
r sub k times delta sub 0 equals r sub k equals 0.	$ r_k ( \delta_0 ) =r_k=0 $
H equals the sum over j of h sub j times sigma sub j.	$ H = \sum_j h_j \sigma_j $
r of lambda, T prime N equals j.	$ r ( \lambda , \mathcal { T } '_N ) = j $
v comma w equals zero.	$ ( v , w ) =0 $
u, v belongs to A star	$ u , v \in A ^ * $
ell of zero, open bracket t, close bracket, is defined as zero.	$ \ell ( 0 ) [ t ] : =0 $
zero point zero zero one two.	$ ~0.0012 $
One five seven five three raised to the power of positive one three five, sub negative one seven two.	$ 15753^ { +135 } _ { -172 } $
y sub j equals n.	$ y_j = n $
h sub open square bracket t sub j, i minus 1, comma t sub j, i close square bracket	$ h_ { [ t_ { j , i-1 } , t_ { j , i } ] } $
f squared of Y is less than or equal to V of Y.	$ f^2 ( Y ) \leq V ( Y ) $
Absolute value of B equals ell minus one.	$ |B| = \ell - 1 $
set of minus, plus, semicolon, minus, comma, plus, comma, plus, comma, ellipsis	$ ( - , + ; - , + , + , \cdots ) $
x sub i of t goes to zero	$ x_i ( t ) \to 0 $
tilde O superscript L	$ \widetilde { \mathcal { O } } ^ { ( L ) } $
T sub j equals R sub j one plus R sub j two.	$ T_j= R_j^1 + R_j^2 $
J raised to the power of U.	$ J ^U $
tilde X open parenthesis zero close parenthesis not equal to zero	$ \tilde X ( 0 ) \neq0 $
delta sub i comma j equals zero.	$ \delta_ { i , j } =0 $
Eighty-four plus or minus zero point four.	$ 84.5\pm0.4 $
2.2179825 plus or minus0.0009.	$ 2.2179825\pm0.0000009 $
g maps from tilde Y to Y.	$ g : \tilde { Y } \to Y $
-1.547 plus or minus 0.020	$ -1.547 \pm 0.020 $
overline J sub 1	$ \overline { \mathcal { J } } _1 $
s equals h a raised to the power of i d b raised to the power of j.	$ s=h a^i d b^j $
Y raised to the power of sigma, sub eta comma s.	$ Y ^ { \sigma } _ { \eta , s } $
b raised to the power of p sub i j equals zero.	$ b^p_ { ij } =0 $
Sigma subset Omega.	$ \Sigma\Subset \Omega $
Delta to the power of zero star S.	$ \Delta^0\star S $
p, p, 3	$ ( p , p , 3 ) $
x sub n belongs to A sub n, n greater than or equal to 1.	$ x_n\in A_n , n\geq 1 $
minus D to the power of 3, subscript 55.	$ -D^ { ( 3 ) } _ { 55 } $
ell is less than zero.	$ \ell < 0 $
The absolute value of C sub t open parenthesis x close parenthesis minus C sub t open parenthesis y close parenthesis.	$ |C_t ( x ) -C_t ( y ) | $
t equals i j k	$ t=ijk $
open parenthesis, j minus 1, close parenthesis, p plus 1.	$ ( j-1 ) p+1 $
( y, empty set, A + C + x-y, D )	$ ( y , \emptyset , A+C+x-y , D ) $
C sub max is greater than or equal to zero.	$ C_ { max } \geq 0 $
J goes to zero.	$ \mathcal { J } \to 0 $
x sub m belongs to the open interval from c sub 3 to c sub 6.	$ x_ { m } \in ( c_3 , c_6 ) $
P, Q belong to the set of complex numbers, C, with variables x sub 1 and x sub 2.	$ P , Q \in \mathbb { C } [ x_1 , x_2 ] $
Angle Q squared is not equal to zero.	$ \langle Q^2 \rangle \neq 0 $
Alpha is greater than alpha sub HS.	$ \alpha > \alpha_ { HS } $
The hat U equals e to the power of negative i hat H t.	$ \hat { U } = \exp ( - i \hat { H } t ) $
mu sub zero equals 3.540.	$ \mu_ { 0 } =3.540 $
Open square bracket omega close square bracket belongs to capital Omega subscript check M.	$ [ \omega ] \in\Omega_ { \check { M } } $
s sub mu equals mu square root of 2 pi.	$ s_\mu = \mu \sqrt { 2 \pi } $
B sub h.	$ \mathcal { B } _h $
b sub 0 exclusive or b sub 1.	$ b_0 \oplus b_1 , $
G of t, comma, F of t	$ ( G ( t ) , F ( t ) ) $
P equals open parenthesis p sub 1, comma, p sub 2, comma, ellipsis, close parenthesis.	$ P= ( p_1 , p_2 , \dots ) $
Lambda sub B equals 0.2.	$ \lambda_B = 0.2 $
Gamma, Delta, d greater than 0.	$ \Gamma , \Delta , d > 0 $
Mathcal P plus sigma f sub i intersection F	$ \mathcal { P } ^+_ { \sigma ( f_i ) \cap F } $
wide hat o sub off	$ \widehat { o_ { off } } $
1.198 plus or minus 0.042	$ 1.198 \pm { 0.042 } $
zero point one five one subscript three point six.	$ 0.51_ { 3.6 } $
c equals 5.25	$ c=5.25 $
r hat sub 2 star	$ \hat { r } _2^ * $
C sub zero equals zero point five six eight eight seven.	$ C_0=0.56802827 $
y sub i j superscript nu	$ y_ { ij } ^ { ( \nu ) } $
Alpha sub 5 greater than 0.	$ \alpha_5 > 0 $
Zeta sub n not in K.	$ \zeta_n\notin K $
Delta K of tau is greater than or equal to epsilon.	$ \Delta K ( \tau ) \geq \epsilon $
Delta t b sub k comma 0 comma j.	$ \Delta_t b_ { k,0 , j } $
x y equals t sub one.	$ xy=t_1 $
t omega sub c i equals 400	$ t\Omega_ { ci } =400 $
Math frak b sub 1 equals 0.	$ \mathfrak { b } _ { 1 } =0 $
Delta sub L of R	$ \Delta_ { L ( R ) } $
Absolute value of E is less than or equal to q to the power of q to the power of 3n, times r sub M of E.	$ |E| \leq q^ { q^ { 3n } } r_M ( E ) $
C raised to the power of ijk equals negative epsilon sub k l times K raised to the power of i j l divided by 4.	$ C^ { ijk } = -\epsilon_ { kl } K^ { ijl } /4 $
Gamma of f minus Gamma of g.	$ \Gamma ( f ) -\Gamma ( g ) $
Beta equals the existence of g sub gamma.	$ \beta = \exists_ { g } ( \gamma ) $
N sub zero equals ten to the power of five.	$ N_ { 0 } =10^ { 5 } $
Epsilon sub t equals z sub t.	$ \epsilon_t = z_t $
L equals tau divided by n to the power of four-fifths.	$ L=\tau/n^ { 4/5 } $
N is a subset of M.	$ N \subset M $
N raised to the power of k minus 1, LO.	$ \text { N } ^ { k-1 } \text { LO } $
r sub R	$ r_ { \mathcal { R } } $
Tau sub B superscript s.	$ \tau_\mathcal { B } ^s $
delta.	$ \rho^ { \delta , h } \to\rho^ { 0 , h } $
I sub c, sf of T.	$ I_ { c , sf } ( T ) $
x sub tau equals x sub zero equals one.	$ x_\tau=x_0=1 $
tilde F pi.	$ \tilde F^\pi $
28.10 to the power of plus 0.23, sub minus 0.9.	$ 28.10^ { +0.23 } _ { -0.19 } $
r sub e equals r sub f equals r sub g equals.	$ r_e = r_f = r_g = $
zero point two five six three.	$ 0.25673 $
a, b equals one, two, dot dot dot, n minus s	$ a , b=1,2 , \cdots , n-s $
p belongs to the set containing negative one and positive one.	$ p \in \ { -1 , +1\ } $
Open parenthesis, a, comma, b minus ell, close parenthesis.	$ ( a , b-\ell ) $
r-bar belongs to L-bar.	$ \bar r \in \bar L $
0.42 plus or minus 0.05	$ 0.42\pm0.05 $
R sub l over n l raised to the power of 1 omega.	$ R_ { l/nl } ^ { \left ( 1\omega\right ) } $
phi raised to the power of r of l	$ \phi^r ( l ) $
p equals open parenthesis one minus pi close parenthesis p sub zero plus pi p sub one.	$ p= ( 1-\pi ) p_0+\pi p_1 $
k sub zero.	$ ( k_0 $
b prime equals b	$ b'=b $
d of v comma w equals infinity	$ d ( v , w ) =\infty $
v implies v prime	$ v\searrow_V v ' $
eff of z minus bar eff of z	$ f ( z ) -\bar f ( z ) $
forty-three point seven eight.	$ 43.78 $
B squared of phi sub c equals m to the power of 4 sub chi minus alpha to the power of 4.	$ B^2 ( \phi_c ) =m^4_\chi-\alpha^4 $
X raised to the power of star, tilde X raised to the power of star, pipe C raised to the power of star.	$ ( X^ { * } , \tilde { X } ^ { * } ) |C^ { * } $
k is greater than or equal to 1.	$ k \geq { 1 } $
f sub a less than or equal to m sub p	$ f_a \leq m_p $
r equals zero point zero zero two two.	$ r=0.0022 $
P of x divided by I of x.	$ P ( x ) /I ( x ) $
kay sub z equals kay.	$ k_z : = k $
c belongs to the set of 0, 1, dot dot dot, C minus 1.	$ c \in\ { 0,1 , ... , C-1\ } $
Gamma of s belongs to Omega sub Gamma.	$ \gamma ( s ) \in \Omega_\Gamma $
x, y, z belongs to the set of integers from n.	$ x , y , z \in [ n ] $
z not equal to zero.	$ z\neq 0. $
Delta V equals V sub i minus V sub j.	$ \Delta V = V_i - V_j $
f of R squared, x is less than 1	$ f ( R^2 , x ) < 1 $
ten sub four	$ 10_ { 4 } $
gamma sub P T superscript 1	$ \gamma_ { PT } ^ { ( 1 ) } $
Alpha plus, beta plus, alpha minus, beta minus.	$ \alpha_+ , \ \beta_+ , \ \alpha_- , \ \beta_- $
Minimize p in the set of delta, p transpose A x, greater than zero.	$ \min_ { p \in \triangle } p^\top A x > 0 $
thirty point one six.	$ 32.16 $
u v y equals u w t	$ uvy=uwt $
cosine alpha raised to the power of n	$ ( \cos\alpha ) ^n $
B equals A times the inverse of p, less than L.	$ B=A [ p^ { -1 } ] < L $
Epsilon equals epsilon of ell equals one over ell squared.	$ \varepsilon=\varepsilon ( \ell ) =1/\ell^2 $
mu sub 2 equals mu bar sub Omega.	$ \mu_2=\mu|_ { \Omega } $
q belongs to the set AB of d	$ q \in AB ( d ) $
f star sub e	$ f^ * _ { e } $
C times the quantity C sub 1 divided by B, absolute value of Gamma, L.	$ C\cdot \frac { C_1 } { B } |\Gamma|L $
Absolute value of z squared divided by 2 equals 4 g squared divided by delta squared.	$ |z|^ { 2 } / 2 = 4 g^ { 2 } / \delta^ { 2 } $
Gamma v to the power of i.	$ \gamma_v^ { i } $
R-S.	$ \mathit { SR } $
if there exists any other questions.	$ : if there were paths using both , $
The set I belongs to the set A.	$ \mathcal { I } \ ! \in \ ! \mathcal { A } $
T sub n greater than or equal to k.	$ ( T_n \geq k ) $
b sub 0, open parenthesis, S prime, close parenthesis, minus 1.	$ b_0 ( S ' ) - 1 $
X raised to the power of PCA.	$ X^ { PCA } $
3.2 plus or minus 1.3	$ 3.2\pm1.3 $
epsilon sub k equals mu.	$ \varepsilon_ { k } =\mu $
r-hat equals zero.	$ \hat { r } =0 $
zeta of z sub I, z sub T	$ \zeta ( z_I , z_T ) $
Curly brace, F sub zero, comma, F sub 3, curly brace, equals zero.	$ \ { F_0 , F_3 \ } = 0 $
V to the power of pi 2 is greater than or equal to V to the power of pi prime 2.	$ V^\pi_2 \geq V^ { \pi ' } _2 $
The pronunciation of the equation is as follows: Rho prime sub x, bar, sub Gamma sub K sub 2, infinity.	$ \rho'_x|_ { \Gamma_ { K_ { 2 , \infty } } } $
M of P sub i	$ \bar M ( P_ { i } ) $
a raised to the power of asterisk sub j	$ a^ { \ast } _j $
G equals H.	$ G=H $
9 sub 13	$ 9_ { 13 } $
tilde Omega sub 2 delta.	$ \tilde \Omega_ { 2\delta } $
five hundred eighty-six point three three.	$ 586.23 $
d r star equals e to the power of delta times N inverse times d r.	$ dr_ { * } =e^ { \Delta } N^ { -1 } dr $
The quantity x sub 0 plus x sub 1 plus x sub 2 plus x sub 3 divided by 4.	$ ( x_0 + x_1 + x_2 + x_3 ) /4 $
r bar dot sub m open parenthesis beta epsilon close parenthesis.	$ \dot { \bar r } _m ( \beta_\epsilon ) $
sim, 10 degrees.	$ { \sim } \,10^\circ $
a not in the set of k, dot dot dot, 2k minus 1	$ a\notin \ { k , \dots , 2k-1\ } $
H bar sub p comma t, set minus q	$ \overline { H_ { p , t } } \setminus q $
lambda equals two m	$ \lambda=2m $
ell equals 2, g sub 12	$ \ell=2 , g_ { 12 } $
K plus goes to pi plus.	$ K^+\to \pi^+ +\ , $
Phi belongs to L infinity of Omega.	$ \phi \in L^\infty ( \Omega ) $
W sub R superscript R	$ W_ { R } ^R $
D prime belongs to Delta of Sigma, L prime	$ D ' \in \Delta ( \Sigma , L ' ) $
m equals r.	$ m=r $
Sigma m equals negative one hundred.	$ \sigma_m=-100 $
mu minus one-half a sigma squared	$ \mu-\frac { 1 } { 2 } a \sigma ^2 $
Omega sub zero T equals pi.	$ \Omega_0 T=\pi $
14.2 sub negative 0.6 superscript positive 1.4	$ 14.2_ { -0.6 } ^ { +1.4 } $
alpha of x	$ \alpha ( \vec x ) $
R squared equals 0.729.	$ R^2 = 0.729 $
v sub j, ellipsis, v sub k minus 1	$ \ { v_j , \ldots , v_ { k-1 } \ } $
Pi sub n equals phi circle iota sub n.	$ \pi_n=\phi\circ\iota_n $
goto i, not x equals v	$ \mathsf { goto ( i , ! ( x=v ) ) } $
Phi sub i equals f to the power of r Phi sub i prime.	$ \Phi_i = f^r \Phi_i ' $
p minus tau minus 1 is greater than 0.	$ p-\tau -1 > 0 $
B sub t sub 1, dot dot dot, B sub t sub n	$ ( B_ { t_1 } , ... , B_ { t_n } ) $
f sub sigma squared is approximately f sub sigma.	$ f_\sigma^2 \sim f_\sigma $
zero point three h-bar.	$ 0.3 \hbar $
b sub s equals 0.23 plus or minus 5.9.	$ b_ { s } = 0.23 \pm 5.9 $
3.57 raised to the power of plus 0.15, sub minus 0.15.	$ 3.57^ { +0.15 } _ { -0.15 } $
zeta double prime.	$ \zeta \prime \prime $
greater than or equal to fifteen.	$ \geq15 $
X sub u, open parenthesis, t plus 1, close parenthesis.	$ X_ { u } ( t+1 ) $
a sub 15.	$ a_ { 15 } $
G sub less than or equal to x	$ G_ { \leq x } $
Pr equals nu divided by kappa equals 4.38.	$ { Pr } { = } \nu/ { \kappa } { = } 4.38 $
f raised to the power of u equals g raised to the power of u.	$ f^u = g^u $
H sub j of x, y	$ \mathcal { H } _j ( x , y ) $
f sub r plus delta f sub r.	$ f_r+\Delta f_r $
R to the power of 2, open parenthesis, xi, close parenthesis.	$ R^ { ( 2 ) } ( \xi ) $
f of x approximately zero.	$ f ( x ) \approx 0 $
N intersect F equals B.	$ N\cap F = B $
77.1 raised to the power of positive 5.8 subscript negative 4.6.	$ 77.1^ { +5.8 } _ { -4.6 } $
B implies D star tau anti nu.	$ B\rightarrow D^ { * } \tau \bar { \nu } $
Lambda to the power of n minus 1 equals plus or minus alpha.	$ \lambda^ { n-1 } =\pm\alpha $
P sub Y sub i is not equal to empty set.	$ \P_ { Y_i } \neq \emptyset $
ten AU.	$ 10\text { AU } $
ℓ sub n equals s sub n plus 1.	$ \ell_n=s_n+1 $
zero point zero six one minus four point seven.	$ 0.061 - 4.7 $
f maps L to X.	$ f : L\rightarrow X $
w equals 5 over 3.	$ w=5/3 $
L squared, times, g to the power of negative one.	$ L^2 ( g^ { -1 } ) $
hat Y sub m raised to the power of T	$ \hat { Y } _m^T $
F of q equals the sum of F sub ell of q and F sub h of q, divided by 2.	$ F ( q ) = ( F_\ell ( q ) +F_h ( q ) ) /2 $
Open parenthesis, sigma superscript g, comma, theta superscript g, close parenthesis.	$ ( \sigma^g , \vartheta^g ) $
D sub l of t	$ D_l ( t ) $
H sub m superscript 1	$ \mathcal { H } _m^ { ( 1 ) } $
K sub i intersection H is a subset of Omega sub i intersection V	$ K_i \cap H \subset \Omega_i \cap V $
nanowires.	$ \it { nanowires } $
d sub ell one of o, v prime equals n	$ d_ { \ell^1 } ( o , v ' ) = n $
O of k given S	$ O ( k|S| ) $
Beta equals the square root of one minus four times M sub Y squared divided by s.	$ \beta=\sqrt { 1-4M_Y^2/s } $
negative twenty to the power of positive seven, subscript negative four.	$ -20^ { +7 } _ { -4 } $
r sub g equals two point zero.	$ r_g=2.0 $
s is equivalent to E squared.	$ s \equiv E^2 $
n plus n divided by 2	$ n+n/2 $
L sub h, 55	$ L_ { h,55 } $
Open parenthesis, hat r sub i j, comma, r sub i j, close parenthesis.	$ ( \hat { r } _ { ij } , r_ { ij } ) $
The energy of U, denoted as E sub g of U, is greater than the energy of U, denoted as E sub b of U.	$ E_g ( U ) > E_b ( U ) $
Gamma sub i greater than or equal to 1.	$ \Gamma_i \gtrsim 1 $
n sub sim	$ n_ { sim } $
f sub STFT	$ { f_ { STFT } } $
x sub C of Q	$ x_ { C ( Q ) } $
E sub XH minus E sub XC equals E sub S.	$ E_ { XH } - E_ { XC } =E_S $
Alpha prime equals the set of integers.	$ \alpha'= [ Z ' ] $
r sub H equals r sub H star equals 1.15467.	$ r_ { H } =r_ { H } ^ * =1.15467 $
u belongs to T.	$ u\in T $
one point nine times.	$ 1.9 * $
u sub g equals nabla perpendicular psi.	$ u_g=\nabla^\perp\psi $
Seventy-five h to the power of negative one cubic megaparsecs.	$ ( 75h^ { -1 } ~\text { Mpc } ) ^3 $
ket a ket	$ |a\rangle\ ! \rangle $
Open parenthesis b, comma, b prime, close parenthesis, belongs to S.	$ ( b , b ' ) \in S $
ξ sub 0 equals partial epsilon sub 0 over partial n.	$ \xi_0 = \partial \varepsilon_0 / \partial n $
j is less than or equal to k sub j, which is less than or equal to n sub j, comma.	$ j \leq k_j \leq n_j , $
T sub c prime	$ T_ { c } ' $
Open brace, z sub i, comma, t sub i, comma, y sub i F, close brace, sub i equals 1, caret, n.	$ \ { ( z_i , t_i , y_i^F ) \ } _ { i=1 } ^n $
Lambda sub mu equals Lambda open parenthesis G sub mu close parenthesis.	$ \Lambda_\mu = \Lambda ( G_\mu ) $
G divided by G sub x.	$ G/G_x $
c sub 3 equals D d eta raised to the power of 4 divided by 3 sigma raised to the power of 4.	$ c_3=\frac { Dd\eta^4 } { 3\sigma^4 } $
mu bar sub k equals one minus mu sub k.	$ \bar \mu_k=1-\mu_k $
phi of sigma two	$ \varphi ( \sigma_2 ) $
1549: One thousand five hundred forty-nine.	$ 1549 $
m sub z plus square root of one minus m sub x squared, plus or minus one equals zero.	$ m_ { z } +\sqrt { 1-m_ { x } ^ { 2 } } \mp1=0 $
One hundred eleven over one over one.	$ 111\overline { 1 } \overline { 1 } $
equals 1.8.	$ = 1.8 $
Omega squared sub 1.	$ \omega^2_1 $
Upsilon sub reg of r equals little o of r.	$ \Upsilon_ { reg } ( r ) =o ( r ) $
the commutator of u and uf.	$ [ u , uf ] $
omega approximately equals 1.01.	$ \omega \approx 1.01 $
Gamma sub negative j equals Gamma sub j transpose equals Gamma sub j.	$ \Gamma_ { -j } = \Gamma_j^ { T } = \Gamma_j $
epsilon of k equals v h-bar times the absolute value of k.	$ \epsilon\left ( k\right ) = v \hbar |k| $
j belongs to the set O of i.	$ j \in O ( i ) $
x prime, y prime, u sub 1, u sub 2, ellipsis, u sub k, x, y.	$ x ' , y ' , u_1 , u_2 , \ldots , u_k , x , y $
( d, k ), ( d prime, k prime )	$ ( d , k ) , ( d ' , k ' ) $
i with subscript t0 equals n0.	$ i_ { t_0 } =n_0 $
Nu equals one point zero two plus or minus zero point zero five.	$ \nu = 1.02\pm0.05 $
N sub A equals the binomial coefficient of q choose m.	$ N_A = \binom { q } { m } $
g sub 1 prime of x minus h sub 1 of x less than or equal to alpha	$ g_1 ' ( x ) -h_1 ( x ) \leqslant \alpha $
Zero point four five plus or minus zero point eight.	$ 0.45\pm 0.08 $
g maps the interval from 0 to a to the interval from negative K to K.	$ g : [ 0 , a ] \to [ -K , K ] $
Zero point seven four six open parenthesis plus or minus zero point one two five close parenthesis.	$ 0.746 ( \pm 0.152 ) $
theta sub global superscript 1	$ \theta_ { global } ^1 $
j equals one, dot dot dot, R	$ j = 1 , ... , R $
negative zero point six three six nine four.	$ -0.638694 $
k equals t, t plus one, dot dot dot, T to the power of t.	$ k=t , t+1 , ... , T^t $
J tilde sub n	$ \widetilde { J } _n $
dee to the power of alpha sub s	$ d^ { \alpha } _ { s } $
Two m plus l plus i plus three equals three m plus four.	$ [ 2m+l+i+3 ] = [ 3m+4 ] $
you belongs to bee open parenthesis tee close parenthesis	$ u \in B ( t ) $
G equals open parenthesis G sub N close parenthesis.	$ G= ( G_N ) $
M sub 1, b, M sub 2, b	$ ( M_ { 1 , b } , M_ { 2 , b } ) $
G of m, x, y equals m times P to the power of o, y.	$ G ( m ) ( x , y ) = ( mP^o ) ( y ) $
a, open square bracket, dot, close square bracket, comma, dot.	$ a ( [ \cdot ] \ , , \cdot ) $
Widetilde mu is less than negative absolute value of zeta.	$ { \widetilde \mu } < -|\zeta| $
Sigma of x is less than infinity.	$ \Sigma ( x ) < \infty $
T sub Max.	$ T_\text { Max } $
W sub 2796 A	$ W_ { 2796 } \ , ( \text { \AA } ) $
1.58 raised to the power of positive 0.58, subscript negative 0.06.	$ 1.58^ { +0.06 } _ { -0.06 } $
zee equals six point six of three	$ z=1.6 ( 3 ) $
The set containing p raised to the power of 0 equals p prime raised to the power of 0 equals M.	$ p^0 = p ' { } ^0 = M $
K plus equals open parenthesis V comma E plus close parenthesis.	$ K^+= ( V , E^+ ) $
zero, two, L.	$ ( 0,2 , L ) $
j not in Omega	$ j\notin\Omega $
e to the power of y sub I.	$ e^ { y_I } $
Epsilon is less than n sub i inverse.	$ \epsilon < n_i^ { -1 } $
s equals n sub 0	$ s = n_0 $
P of rho to the power of bullet	$ P ( \rho^ { ( \bullet ) } ) $
L sub i of xi sub j.	$ L_i\left ( \xi_j\right ) $
I is a proper subset of Delta.	$ I \subsetneq \Delta $
The derivative of psi with respect to f equals alpha times psi.	$ \psi'\circ f = \alpha\psi $
a prime sub r minus one c.	$ a ' _ { ( r-1 ) c } $
S sub N theta	$ S_ { N } \theta $
a sub 1, ellipsis, a sub c	$ a_1 , \dots , a_c $
chi over n.	$ \chi/n $
q times the expectation of G in S and q	$ q\ , \mathcal { E } \left ( G ; S , q\right ) $
c equals c sub zero plus c sub one p plus dot dot dot plus c sub n p to the power of n.	$ c= c_0+c_1p+\cdots+c_np^n $
span of nu perpendicular.	$ \text { span } \ { \nu\ } ^ { \perp } $
v raised to the power of a sub n n	$ v^a_ { nn } $
X goes to negative X.	$ X\to -X $
N sub t r, equiv equals 31.6.	$ N_ { tr , equiv } = 31.6 $
two point nine two three three	$ 2.9237 $
Overline phi nu over delta squared.	$ \overline { \phi } _\nu/\delta^2 $
r delta intersect Z to the power of n.	$ r\Delta\cap \mathbb { Z } ^n $
One divided by alpha is greater than the absolute value of y evaluated at R minus.	$ 1/\alpha > |y ( R_- ) | $
psi prime of 1 is less than zero.	$ \psi ' ( 1 ) < 0 $
Ten to the power of negative three, approximately M sub solar mass.	$ 10^ { -3 } ~M_\odot $
forty-eight point one three.	$ 48.13 $
x less than d sub l minus 1	$ x < d_ { l-1 } $
v to the power of negative one times sigma of s sub alpha w v	$ v^ { -1 } \sigma ( s_\alpha wv ) $
b raised to the power of k sub 0 sub j, lambda sub 0.	$ b^ { k_0 } _ { j , \lambda_0 } $
Phi sub m of x equals m phi of m x.	$ \phi_m ( x ) = m \phi ( mx ) $
Z equals 19 minus 24.	$ Z = 19-24 $
Negative eleven point one seven three brackets negative nine.	$ -11.177 [ -9 ] $
ref-inNet	$ RefinerNet $
e raised to the power of plus or minus i x.	$ e^ { \pm i x } $
Omega sim 1.7 T.	$ \Omega \sim 1.7 T $
1.34 plus or minus 0.13	$ 1.34\pm0.13 $
tilde xi is greater than or equal to xi.	$ \tilde \xi\geq \xi $
Square root of C sub 1.	$ \sqrt { C_1 } $
Two point one two two seven five ten to the power of negative five.	$ 2.17227050\ 10^ { -5 } $
22 degrees is less than or equal to the absolute value of phi sub S, which is less than or equal to 30 degrees.	$ 22^\circ\leq|\phi_S|\leq30^\circ $
mean sub sar	$ \mathit { to\_mean\_scalar } $
Y sub a1, W sub a sub 0	$ Y_ { a_1 , W_ { a_0 } } $
n sub eta equals n sub mu equals 1.	$ n_\eta=n_\mu=1 $
delta of tau minus tau one	$ \delta ( \tau-\tau_1 ) $
Two p plus one.	$ ( 2p+1 ) $
P sub k of k	$ P_k ( K ) $
L of f is not equal to zero.	$ L ( f ) \neq 0 $
P not equal to P sub k	$ P \neq P_k $
B sub n equals zero.	$ [ B_n ] =0 $
delta bar sub i j.	$ \bar { \Delta } _ { ij } $
$\ell$ equals one, two, dot dot dot, eta.	$ \ell = 1 , 2 , \ldots , \eta. $
U plus L sub g prime	$ U\oplus L_ { \mathfrak { g } } ' $
Omega equals open parenthesis r, theta, phi, close parenthesis.	$ \Omega= ( r , \theta , \phi ) $
1.91 plus or minus 0.16.	$ 1.91\pm0.16 $
sigma	$ \frac { k_F^\sigma L } { 2\pi } $
i belongs to the set containing 0, 1, dot dot dot, zeta minus 2.	$ i \in \ { 0 , 1 , \ldots , \zeta-2\ } $
U subset M tilde	$ U \subset \tilde { M } $
y to the power of open parenthesis i close parenthesis star	$ \ { y^ { * ( i ) } \ } $
Bar x sub j i, open parenthesis, t sub k sub j, close parenthesis.	$ \overline { x } _ { ji } ( t_ { k_j } ) $
l sub 1 is similar to l sub 2 if and only if l is much less than n.	$ l_1 \sim l_2 \equiv l \ll n $
1.06 raised to the power of plus0.023, subscript 0.038.	$ 1.06^ { +0.023 } _ { -0.038 } $
sigma sub plus/minus equals plus/minus one.	$ \sigma_ { \pm } =\pm 1 $
k belongs to the set of integers from n minus the set containing j.	$ k \in [ n ] - \ { j\ } $
A sub 7 set minus open brace t close brace.	$ A_7\setminus\ { t\ } $
W sub zero equals W sub R equals W sub R prime.	$ W_0 : = W_ { R } =W_ { R ' } $
Negative 22.46 is less than or equal to M sub B, which is less than or equal to negative 19.05.	$ -22.46 \leqslant M_B \leqslant -19.05 $
h belongs to the intersection of Lambda and K sub v, set minus the set containing 0.	$ h\in ( \Lambda\cap K_v ) \setminus\ { 0\ } $
o sub p, open parenthesis, n to the power of negative one-fourth, close parenthesis.	$ o_p ( n^ { -1/4 } ) $
N delta	$ N\delta $
T equals T superscript mu mu	$ \mathcal { T } =\mathcal { T } ^\mu_\mu $
C to the power of p.	$ { \mathbb { C } ^p } $
h subscript d of G h subscript G	$ h_ { \d ( G ) } h_G $
B sub 1 equals B sub 2 equals B sub 3 equals e to the power of.	$ B_1=B_2=B_3= \exp , $
positive six point nine nine.	$ +6.99 $
C sub psi superscript t.	$ C_\psi^t $
zero point nine gamma sub j	$ 0.9 \gamma_j $
d sub w is less than or equal to two times delta of x.	$ d_w \leq 2\cdot \delta ( x ) $
tau sub j open parenthesis xi sub j plus 1 close parenthesis equals xi sub j	$ \tau_ { j } ( \xi_ { j+1 } ) = \xi_j $
R sub u squared of v	$ R_u^2 ( v ) $
five thousand five hundred twenty-five.	$ 5235 $
tau of C sub n	$ \tau ( C_n ) $
Open parenthesis, mu sub t minus X sub t, close parenthesis, subscript t belongs to the interval from 0 to T.	$ ( \mu_t - X_t ) _ { t \in [ 0 , T ] } $
Square root of 2 times D sub X, multiplied by eta sub X.	$ \sqrt { 2D_ { X } } \cdot \eta_ { X } $
(dot) raised to the power of T, (dot) raised to the power of H	$ ( \cdot ) ^ { T } , ( \cdot ) ^ { H } $
Alpha sub i j of t.	$ \alpha_ { ij } ( t ) $
Delta squared.	$ \Delta^2 $
mu equals zero, one, two, three	$ \mu=0 , 1 , 2 , 3 $
M sub 2, g sub 2 of t.	$ ( M_2 , g_2 ( t ) ) $
R N N sub k	$ { RNN } _k $
dee sub v prime equals dee.	$ d_ { v ' } = d $
alpha of m sub th	$ \alpha ( m_ { th } ) $
Alpha sub zero greater than or equal to two.	$ \alpha_0\geq 2 $
Phi sub i, colon H sub i hookrightarrow G.	$ \varphi_i\colon H_i \hookrightarrow G $
R squared equals 0.44.	$ { R^2 } = 0.44 $
t approximately 0.43 seconds.	$ t \approx 0.43\ , s $
Bar a star double turnstile lambda to the power of n of x vertical bar A	$ \bar a^ * \vDash \lambda^ { ( n ) } ( x ) |_A $
r sub o goes to infinity.	$ r_o\to\infty $
C sub 8 equals the set 7	$ C_8 = \ { 7\ } $
D not equal to C	$ D \neq \mathbb { C } $
m sub N is approximately equal to m sub A sub s divided by 2.	$ m_N \simeq m_ { A_s } /2 $
Forty-eight point zero three up arrow.	$ 48.03\uparrow $
w sub h equals e sub h to the power of c.	$ w_h=e_h^c $
Epsilon star is less than one.	$ \varepsilon^ { * } < 1 $
f prime f belongs to B sub g	$ f ' f\in B_g $
j belongs to T sub i plus 1	$ j \in T_ { i+1 } $
M equals the set containing Ad, Bob, and Carl.	$ M=\ { Ad , Bob , Carl\ } $
Epsilon sub a comma k goes to zero.	$ \epsilon_ { a , k } \to 0 $
w sub 0 is approximately lambda.	$ w_0\approx\lambda $
x raised to the power of k belongs to H sub k.	$ x^k\in H_k $
k is not equal to K	$ k\subsetneq K $
q sub 1 minus tau raised to the power of B prime.	$ q_ { 1-\tau } ^ { B\prime } $
One point six nine plus or minus zero point zero two.	$ 1.69 \pm 0.02 $
B sub h plus	$ B_h^+ $
Delta t sub A equals Delta t sub B square root of 1 minus v squared over c squared.	$ \Delta t_A = \Delta t_B\sqrt { 1-v^2/c^2 } $
T sub 2,3, semicolon 2,4 prime.	$ T_ { 2,3 ; 2,4 } ' $
W equals S sub K.	$ W=S_K $
Pr equals 0.102.	$ Pr = 0.102 $
phi sub one of kappa	$ \phi_1 ( \kappa ) $
maps to	$ ( g , \theta ) \mapsto \psi_g ( \theta ) $
U divided by kappa equals ten.	$ U/\kappa=10 $
curly brace, comma, caret, for all left.	$ , stating that for large enough $
Xi equals plus or minus xi sub c.	$ \xi=\pm \xi_ { c } $
nu equals ell.	$ \nu=l $
w colon A approximately equal to B	$ w : A \simeq B $
tilde phi sub alpha of n	$ \tilde { \phi } _\alpha ( n ) $
j equals nine divided by two.	$ j=9/2 $
m equals 2, dot dot dot, 7	$ m=2 , \ldots,7 $
Phi sub w superscript j open parenthesis x close parenthesis	$ \phi_w^j ( x ) $
Q of C intersect D equals Q sub X of C times Q sub Y of D.	$ Q ( C\cap D ) = Q_ { X } ( C ) Q_ { Y } ( D ) $
P of q sub 12, q sub 23, q sub 13	$ \bar P ( q_ { 12 } , q_ { 23 } , q_ { 13 } ) $
d sub L equals 24	$ d_L = 24\ , $
Big O of n cubed log to the fourth power of n.	$ O ( n^3 \log^4 n ) $
Three divided by one, colon, three point seven seven six colon zero.	$ 3/1/0:35786:0 $
c equals zeta star of 2s squared.	$ c = \zeta^ * ( 2s ) ^2 $
em sub rho to the power of en	$ m_\rho^ { ( n ) } $
Y, h	$ \ { Y , h\ } $
b sub 2 equals negative two-fifths.	$ b_2 =-\frac { 2 } { 5 } $
Q sub 1 raised to the power of 2,3 equals Q sub 2 raised to the power of 2,3 equals Q sub 3 raised to the power of 2,3.	$ Q_1^ { 2,3 } = Q_2^ { 2,3 } = Q_3^ { 2,3 } $
f sub T of X sub T	$ f_T ( X_T ) $
u sub p to the power of x.	$ u_p^x $
u sub j of g equals x sub j divided by k.	$ u_j ( g ) = x_j/k $
k minus r, r similar to B of k, p	$ k-r , r\sim B ( k , p ) $
Spoken English: The sum of w sub 1 plus dot dot dot plus w sub N, divided by N.	$ \frac { w_1+\cdots+w_N } { N } $
beta of n	$ \beta [ n ] $
e to the power of g sub s.	$ e^g_s $
eta sub S equals 6.	$ \eta_S=6 $
f equals f sub lambda, evaluated at L.	$ f = f_ { \lambda } |_ { \mathsf { L } } $
z sub zero equals one-half.	$ z_0= \frac { 1 } { 2 } $
b prime, d prime belongs to M sub 2.	$ b ' , d'\in M_2 $
43.06 plus or minus 0.27	$ 43.06\pm0.27 $
s sub R of K	$ s_ { \mathbb { R } } ( \mathcal { K } ) $
minus phi equals minus phi.	$ 1-\phi=-\phi $
Delta F similar.	$ \Delta F \sim $
Open parenthesis tau, comma rho, close parenthesis, arrow, open parenthesis t, comma x, close parenthesis.	$ ( \tau , \rho ) \to ( t , x ) $
f sub ViT	$ f_ { ViT } $
Open parenthesis, hat L, comma, hat K, close parenthesis.	$ ( \hat L , \hat K ) $
K of p to the power of infinity divided by K.	$ K ( p^ { \infty } ) /K $
Lambda sub T sub 1.	$ \lambda_ { T_1 } $
Phi of B sub n	$ \Phi ( B_n ) $
The logarithm of n is much less than s sub 0 is much less than n to the power of one-half.	$ \log n \ll s_0 \ll n^ { 1/2 } $
Alpha, lambda sub max greater than zero.	$ \alpha , \lambda_ { \max } > 0 $
e sub i to the power of end	$ e_i^ { end } $
d of P sub plus, P sub minus equals epsilon	$ d ( P_+ , P_- ) =\varepsilon $
Open parenthesis E, comma, partial E, close parenthesis.	$ ( E , \partial E ) $
absolute value of a sub 3 is much greater than absolute value of a sub i.	$ |a_3| \gg |a_i| $
Y sub T H M E equals 3 times 10 to the power of negative 2.	$ Y_ { THGEM } =3\cdot 10^ { -2 } $
q belongs to k.	$ q\in k $
Bar 1, bar 1, bar 1.	$ [ \bar { 1 } , \bar { 1 } , \bar { 1 } ] $
z equals 2.733	$ z=2.733 $
Absolute value of the set of i in the range of n, such that x sub i equals y sub i, equals n minus k.	$ |\ { i\in [ n ] \mid x_i=y_i\ } |=n-k $
C of u minus the inner product of u and x is greater than zero.	$ C ( u ) -\langle u , x\rangle > 0 $
the average of l sub s is less than 1.137.	$ \bar l_s < 1.137 $
det sub F	$ \text { det } _F $
V sub BO superscript CBS.	$ V_\text { BO } ^\text { CBS } $
r goes to positive infinity.	$ r \rightarrow +\infty $
two hundred eighty-five plus or minus fifteen.	$ 285 \pm 15 $
dimension of R.	$ \dim R $
x sub a of q times v sub a of q, d q	$ x_a ( q ) v_a ( q ) dq $
N prime sub p, gamma prime sub p	$ N'_p ( { \gamma ' } _p ) $
tau of K prime sub 6	$ \tau ( K^ { \prime } _ { 6 } ) $
fraction x of f divided by l	$ \frac { x ( f ) } { l } $
E sub U of k	$ E_U ( k ) $
nabla M dot	$ \nabla_M \cdot $
plus zero point one zero, subscript minus zero point zero seven.	$ ^ { +0.10 } _ { -0.07 } $
Open parenthesis, zero, f sub seven halves, close parenthesis, squared, sub J equals six.	$ ( 0f_ { 7/2 } ) ^2_ { J=6 } $
M of w equals M of v, c sub 1	$ M ( w ) =M ( v , c_1 ) $
P sub k superscript eta open parenthesis t close parenthesis	$ \ { P_k^\eta ( t ) \ } $
T comma S.	$ ( T , S ) $
W bar is less than infinity.	$ \overline { W } < \infty $
Absolute value of C sub i is less than or equal to absolute value of T.	$ |C_ { i } | \leq |T| $
h sub i maps X sub i to P sub 0.	$ h_i\colon X_i\to P_0 $
Curly brace x comma y curly brace belongs to script C.	$ \ { x , y\ } \in \mathcal { C } $
Rho, colon, H of n, arrow, big O of n.	$ \rho\colon H ( n ) \to\O ( n ) $
Phi approximately equal to zero point nine nine pi.	$ \phi\simeq 0.98 \pi $
G of epsilon equals c of epsilon equals one	$ G ( \varepsilon ) =c ( \varepsilon ) =1 $
diam of Pi	$ \text { diam } ( \Pi ) $
Partial G over partial M equals J sub zero.	$ \partial G/\partial M = J_0 $
n sub s is approximately 0.96.	$ n_s\sim 0.96 $
Pi is less than alpha times p.	$ \Pi < \alpha p $
R sub k equals v times t.	$ R_k=v\cdot t $
k less than or equal to l, less than d plus 1.	$ \k\leq\l < d+1 $
The logarithm base 10 of g equals 4.	$ \log_ { 10 } g = 4 $
A of a equals A sub d comma p	$ A ( a ) = A_ { d , p } $
Eighty-one point five six raised to the plus or minus zero point one five.	$ 81.56^ { \pm 0.15 } $
m sub A superscript 0 is greater than 170.	$ m_ { A^0 } > 170 $
w prime of e equals x to the power of j.	$ w ' ( e ) =x^j $
nu equals 180 terahertz.	$ \nu = 180~THz $
b raised to the power of star prime belongs to Q prime.	$ b^ { * \prime } \in Q ' $
T sub c is less than or equal to T is less than or equal to 600.	$ T_ { c } \lesssim T \lesssim 600~ $
j equals one dot dot dot comma D	$ j=1\ldots , D $
U sub zero comma i belongs to script X	$ U_ { 0 , i } \in \mathsf { X } $
L sub N A D S	$ \mathcal { L } _ { NeuroDAVIS } $
a less than or equal to negative two	$ a\leq -2 $
alpha raised to the power of lambda of t	$ \alpha^\lambda ( t ) $
L plus H	$ L+H $
9 2 subscript negative 4.4 superscript positive 4.4	$ { 92.2 } _ { -4.4 } ^ { +4.4 } $
d belongs to the set of 1 to	$ d\in\ { 1 , ... , \ } $
Absolute value of U of S is less than alpha of k times d k.	$ |U ( S ) | < \alpha ( k ) dk $
26.9 plus or minus 4.0	$ 26.9\pm4.0 $
l equals positive or negative 2.	$ l=\pm 2 $
Im lambda equals negative alpha.	$ \Im\lambda=-\alpha $
f belongs to the m sub A	$ f\in \mathfrak { m } _A $
Gamma of one, two, three, four.	$ \Gamma ( 1,2,3,4 ) $
less than superherry1 less than.	$ \ < supercherry1less > $
open parenthesis, hat u sub h, comma, hat p sub h, close parenthesis.	$ ( \hat { u } _h , \hat { p } _h ) $
M sub xi prime	$ M_\xi^\prime $
zero point six four six one.	$ 0.646196 $
t maps to t g of t	$ t\mapsto tg ( t ) $
IJ equals 30.	$ IJ=30 $
Phi sub X, open parenthesis, X sub 1 minus X sub 2, comma, Y sub 1 minus Y sub 2, close parenthesis.	$ \Phi_X ( X_1-X_2 , Y_1-Y_2 ) $
x sub i equals open parenthesis i minus one-half close parenthesis delta x.	$ x_i= ( i-\frac { 1 } { 2 } ) \Delta x $
c goes to a bar b bar d	$ c\rightarrow \bar a\ , \bar b\ , d $
E belongs to the set of capital I	$ E \in \mathcal { I } $
P of p sub 1, p sub 2 is less than or equal to n.	$ P ( p_1 , p_2 ) \leq n $
Negative plane approximately equal to cosine the coriolis representing important thing	$ -plane approximation , the Coriolis parameter $
Product over v of A sub v equals I.	$ \prod_ { v } A_ { v } =I $
f bar sub i of dot	$ \bar { f } _ { i } ( \cdot ) $
Q sub 16 to D sub 8.	$ Q_ { 16 } \to D_8 $
Delta squared is equivalent to alpha divided by epsilon.	$ \delta^2\equiv\alpha/\epsilon $
three sigma minus six sigma	$ 3\sigma-6\sigma $
Phi to the power of r.	$ \Phi^ { ( r ) } $
m to the power of one minus two c	$ m^ { 1-2c } $
t sub 34 equals pi.	$ t_ { 34 } =\pi $
Fraction one over r plus one, binomial coefficient two r choose r.	$ \frac { 1 } { r+1 } \binom { 2r } { r } $
i sub 1, dot dot dot, i sub k.	$ i_1 , \dots , i_k $
kappa sub x of z	$ \kappa_x ( z ) $
s sub infinity of J	$ s_\infty ( J ) $
tilde S sub beta of z	$ \tilde { S } _\beta ( z ) $
L sub j prime equals L sub j minus L sub j plus 1.	$ l_j'=l_j-l_ { j+1 } $
B sub R open parenthesis y sub 0 close parenthesis	$ B_R ( y_0 ) $
script O sub X nu open parenthesis X nu close parenthesis	$ \mathcal { O } _ { X_\nu } ( X_\nu ) $
S sub mu superscript r	$ S_ { \mu^r } $
be a point in the interior of	$ be a point in the interior of $
plus or minus zero point zero two	$ ( \pm0.02 ) $
Absolute value of p sub i minus y sub i is less than or equal to epsilon.	$ |p_ { i } -y_ { i } | \leq \epsilon $
1.006 plus or minus 0.029	$ 1.006\pm0.029 $
L sub 2	$ L_2. $
H sub w semicolon 1, 3	$ H_ { w ; 1 , 3 } $
y sub 0 equals 1.5.	$ y_0 = 1.5 $
1.57 plus or minus 0.15	$ 1.57 \pm 0.15 $
tilde u equals nabla perpendicular F	$ \tilde u = \nabla^\perp F $
Equiv sub phi sub zero	$ \Equiv_ { \phi_0 } $
zero point one five zero sub B divided by T S.	$ 0.150\ \mu_B/TM $
a sub k is similar to k factorial times S sub o to the power of negative k	$ a_ { k } \sim k ! S_ { o } ^ { -k } $
two hundred twenty-seven point eight plus or minus one point one.	$ 227.8\pm1.1 $
Fraction partial T partial y sub 2 open parenthesis y close parenthesis.	$ \frac { \partial T } { \partial y_2 } ( y ) $
zero point zero zero plus or minus zero point zero two.	$ 0.00\pm0.02 $
Four times the quantity nine minus h equals four g minus four.	$ 4 ( 9-h ) =4g-4 $
0.39 plus or minus 0.26	$ 0.39\pm0.26 $
B sub plus of f	$ B_+ ( f ) $
s belongs to the set K of r of chi of U.	$ s\in\mathcal { K } er ( \chi ) ( U ) $
Exponential of 0.7 times k sub i minus 1.	$ \exp ( 0.7 k_i ) -1 $
Big O of one over q squared	$ \mathcal { O } ( 1/q^2 ) $
a sub 81 equals 0	$ a_ { 81 } = 0 $
t prime goes to t zero.	$ t'\rightarrow t_0 $
V infinity of Phi is greater than or equal to zero.	$ { V } ^ { \infty } ( \Phi ) \geq 0 $
M minus Y	$ M-Y $
f belongs to the set F.	$ f\in\mathcal { F } $
sub plus or minus zero point zero zero nine.	$ _ { \pm { 0.009 } } $
H sub 2 double prime	$ H_2 '' $
m equals ten thousand.	$ m=10000 $
delta sub one.	$ \delta_ { 1 } $
W sub l equals one.	$ \mathcal { W } _l=1 $
s belongs to the set of Gamma of L squared.	$ s\in \Gamma ( L^2 ) $
g sub u comma i is equivalent to zero.	$ g_ { u , i } \equiv0 $
B bar n of x, r	$ \overline { B } ^n ( x , r ) $
N N sub K over U	$ { FN } _ { ( K/U ) } $
Norm of J J dagger is less than epsilon lambda.	$ \|JJ^ { \dagger } \| < \epsilon_ { \lambda } $
V sub J superscript A n open parenthesis a varpi sub i close parenthesis equals 0	$ V_ { J } ^ { A_n } ( a\varpi_i ) =0 $
The absolute value of B equals 55.	$ \vert B\vert = 55 $
M sub zero equals pi sub X of R sub zero.	$ M_0 : =\pi_X ( R_0 ) $
z sub psi open parenthesis i comma q close parenthesis for all q	$ z_ { \psi ( i , q ) } \ \forall q $
B sub r Subset Omega	$ B_ { r } \Subset \Omega $
L sub t divided by L sub c.	$ L_t/L_c $
zero point nine one seven plus or minus zero point zero zero eight.	$ 0.917 \pm0.008 $
Omega belongs to Sigma star.	$ \omega \in \Sigma ^ { \ast } $
Beta belongs to the set of vectors with subscript h and superscript 0.	$ \beta\in \mathbb { V } _h^0 $
x, y belong to the set of all subsets of the set eta.	$ x , y\in 2^\eta $
d equals 3.55 plus or minus 0.77.	$ d = 3.55 \pm 0.77 $
y equals the absolute value of negative zero point zero nine	$ y=\left|-0.09\right| $
D of R equals infinity	$ D ( R ) = \infty $
D sub r zero of omega.	$ \mathcal { D } _ { \vec { r } _0 } ( \omega ) $
Phi of E equals Gamma plus E.	$ \Phi ( E ) =\Gamma+E $
partial y to the power of n minus one G	$ \partial_y^ { n-1 } G $
P raised to the power of lambda sub k, k belongs to the set of natural numbers.	$ P^\lambda _k , k\in \mathbb { N } , $
d of delta is less than or equal to C times one over delta raised to the power of one over r.	$ d ( \delta ) \leq C ( 1/\delta ) ^ { 1/r } $
P belongs to C to the power of 0 comma alpha of Omega.	$ P \in C^ { 0 , \alpha } ( \Omega ) $
parentheses F of f equals p of f.	$ \mathit { parent } _F ( f ) =p ( f ) $
f sub alpha sub i	$ f_ { \alpha_i } $
A equals T raised to the power of D times T.	$ A = T^ * DT $
v of 0, W	$ v ( 0 , W ) $
112,800: One hundred twelve thousand eight hundred.	$ 112,800 $
four t	$ 4 t $
N sub QW	$ N_\text { QW } $
P sub 7, 11	$ P_ { 7,11 } $
$x_m$ equals delta x times m.	$ x_m = \delta_x \cdot m $
Sigma equals Q transpose Sigma sub 2t Q.	$ \Sigma = Q^\top\Sigma_ { 2 t } Q $
lambda sub V L 8	$ \lambda_ { VL8 } $
C, delta greater than zero.	$ C , \delta > 0 , $
w sub A 0 equals 0	$ w_ { A0 } =0 $
four point two zero.	$ 4.20 $
P equals t sub i sub 1 dot dot dot t sub k.	$ P=t_ { i_1 } \ldots t_ { i_k } $
d, d prime, in D	$ d , d'\in \mathcal { D } $
E Delta A sub 0 subset Omega	$ E\Delta A_0\subset\Omega $
P sub k equals e to the power of negative mu times mu to the power of k divided by k factorial.	$ P_ { k } =e^ { -\mu } \mu^ { k } /k ! $
Negative 5.07 plus or minus 0.03.	$ -5.07\pm0.03 $
Rho sub zero, bar h	$ \rho_ { 0 , \bar { h } } $
R sim kappa to the power of negative one	$ R \sim \kappa^ { -1 } $
Omega to the negative power, right angle bracket.	$ |\Omega^ { - } \rangle $
H over r sub 0, lambda sub O prime	$ ( H/r_0 , \lambda_ { O ' } ) $
V sub t equals L sub t minus b t.	$ V_t=L_t-bt $
174 raised to the power of plus 45, subscript minus 53.	$ 174^ { +45 } _ { -53 } $
W of t equals w star.	$ W ( t ) =w^ { \ast } $
T sub ion.	$ \mathcal { T } _\text { Insertion } $
V equals R sub PSL times open parenthesis I minus I bar sub s close parenthesis.	$ V=R_ { PSL } ( I-\bar I_s ) $
k times the absolute value of j plus t times p.	$ k|j+tp $
One xi sub I equals xi sub I.	$ 1\xi_I=\xi_I $
The interval from 0 to W minus 1.	$ [ 0 , W-1 ] $
The set of G sub t, for t in the interval from negative infinity to zero.	$ \ { G_t\ } _ { t\in ( -\infty,0 ) } $
The quantity ell sub i star plus one is less than or equal to n minus i star.	$ \ell_ { i^ * } +1 \leq n-i^ * $
ksi sub i open parenthesis k plus 1 close parenthesis	$ \xi_i ( k+1 ) $
Psi sub 2 of chi is less than zero.	$ \psi_ { 2 } ( \chi ) < 0 $
z sub j minus u sub i superscript j	$ z_ { j- } u_ { i } ^ { j } $
six point six times ten to the power of negative four.	$ 6.2X10^ { -4 } $
r equals p divided by k.	$ r = p/k $
N sub w of tau equals zero.	$ N_w ( \tau ) =0 $
p sub j, evaluated at Sigma sub j.	$ p_j|_ { \Sigma_j } $
kappa of x equals c sub d times capital I of x.	$ \kappa ( x ) : =c_dI ( x ) $
Psi equals one plus z cubed times Psi.	$ \Psi=1+z^3P \Psi $
v or	$ ( v ) | $
f sub i equals h sub w open parenthesis f sub i sub 1 close parenthesis equals f sub i sub 1	$ f_i = h_w ( f_ { i_1 } ) = f_ { i_1 } $
Nu prime equals the derivative of uc with respect to nu.	$ \nu'=\frac { d_ { \text { uc } } } { d } \nu $
Lambda sub p divided by p to the power of m Lambda sub p.	$ \Lambda_p/p^m\Lambda_p $
minus zero point nine nine one six five nine three two.	$ -0.999116570293592 $
Three point one plus or minus six point six.	$ 31.8\ ! \pm\ ! 4.6 $
h is equivalent to H modulo N.	$ h\equiv\mathcal { H } /N $
Spoken English: p sub k equals q sub k plus 1 divided by q sub k	$ p_k = q_ { k+1 } /q_k $
first product.	$ , and first suppose it uses $
The absolute value of r sub t is less than or equal to 3 times xi squared.	$ |r_t| \leq 3 \xi^2 $
Gamma of r equals h of r minus c of r.	$ \gamma ( r ) =h ( r ) -c ( r ) $
z equals zero point two times the quantity minus minus zero point eight.	$ z=0.2\text { -- } 0.8 $
kappa to kappa inverse.	$ \kappa \to \kappa^ { -1 } $
i belongs to the set of numbers from 1 to p.	$ i \in \ { 1 , \ldots , p \ } $
w sub s equals negative log of u sub s	$ w_s=-\log ( u_s ) $
k minus one, multiplied by n divided by k, plus one-half.	$ ( k-1 ) \frac { n } { k } + 1/2 $
zero point zero three five seven seven.	$ 0.03579 $
b minus a belongs to G	$ b-a \in G $
b raised to the power of l.	$ { b } ^ { l } $
Three is less than or equal to i, less than k.	$ 3\leq i < k $
Beta is similar to 2 minus 3.	$ \beta \sim 2 - 3 $
7.24599 raised to the power of plus 0.00022 minus 0.00021.	$ 7.24599^ { +0.00022 } _ { -0.00021 } $
ell sub p, open parenthesis, f of x, comma, y, close parenthesis.	$ \ell_p ( f ( x ) , y ) $
Xi sub t sub 1 is not equal to the commutator of t sub 1 and x, multiplied by xi sub x.	$ \xi_ { t_1 } \neq [ t_1 , x ] \ast\xi_ { x } $
epsilon of O to the power of ab.	$ \varepsilon ( O^ { ab } ) $
L of I sub i is less than or approximately equal to L of I.	$ \ell ( I_i ) \lesssim \ell ( I ) $
k sub f sub e	$ k_ { fe } $
Xi equals the quantity I times K times s divided by the quantity t minus F sub n.	$ \xi = \frac { IKs } { t - F_n } $
V sub n plus i.	$ V_ { n+i } $
k prime in the set of 1, 2, dot dot dot, k.	$ k ' \in \ { 1,2 , \cdots , k \ } $
A union z	$ A \cup \ { z\ } $
S subscript E.	$ { S_E } $
U sub 2 intersection U sub 4	$ U_2 \cap U_4 $
3.352 plus or minus 0.190	$ 3.352\pm0.190 $
R equals S plus D	$ { \cal R } = { \cal S } + { \cal D } $
k sub l superscript 0	$ k_\ell^0 $
zero point zero zero one times m to the power of negative one.	$ 0.001m^ { -1 } $
xi is less than 0.015.	$ \xi < 0.015 $
T equals X times h times c divided by k times lambda.	$ T = Xhc/k\lambda $
F raised to the power of cont subscript p.	$ F^ { cont } _ { p } $
D of p is proportional to p to the power of one-third.	$ D ( p ) \propto p^ { \frac { 1 } { 3 } } $
Two sub zero as zero two sub zero.	$ ( 2_0\ast_02_02_0 ) $
S multiplied by the quantity of 1 plus 2 delta minus gamma.	$ S ( 1+2 \delta-\gamma ) $
Hat kappa equals kappa of xi star.	$ \hat\kappa=\kappa ( \xi^ * ) $
7.0 plus or minus 0.3.	$ 7.0 \pm 0.3 $
z times the quantity n minus m tends to infinity.	$ z\left ( n-m\right ) \rightarrow\infty $
d sub i times K	$ d_i K $
Phi sub a of b equals phi of a plus b.	$ \phi_a ( b ) =\phi ( a+b ) $
s sub i intersection t sub j	$ s_i \cap t_j $
v not equal to rho sub N	$ v\neq \rho_N $
Square root of N times g.	$ \sqrt { N } g $
A not equal to empty set, V	$ A\neq \emptyset , V $
f belongs to the set of symmetric matrices over the real n-dimensional space.	$ f \in \mathscr { S } ( \mathbb { R } ^n ) $
G sub A to the power of sigma of a.	$ G_A^\sigma ( a ) $
d equals d sub max	$ d=d_ { \max } $
M sub T, open parenthesis, E sub ext, close parenthesis.	$ M_T ( E_ { \text { ext } } ) $
vector p sub k.	$ \vec p_k $
L less than Z sub R	$ ( L < Z_R ) $
Zero is less than phi which is less than one hundred and eighty degrees.	$ 0 < \varphi < 180^ { \circ } $
m equals omega equals lambda equals one.	$ m=\omega=\lambda=1 $
phi of t, x	$ \phi ( t ; x ) $
beta raised to the power of t, sub l.	$ \beta^ { ( \text { t } ) } _l $
E of 2 times K sub 2 equals the set containing a b, comma, c d.	$ E ( 2K_2 ) = \ { ab , cd\ } $
Open parenthesis, delta m to the power of z, comma, delta l to the power of y, close parenthesis.	$ ( \delta m^z , \delta l^y ) $
s sub n, r sub n	$ s_ { n } , r_ { n } $
f of u sub n equals u sub n prime	$ f ( u_n ) = u_ { n } ' $
L raised to the power of n divided by p minus 1.	$ L^ { \frac { n } { p-1 } } $
O sub 1, open parenthesis, absolute value of x, raised to the power of negative beta minus 1, close parenthesis.	$ O_1 ( |x|^ { -\beta-1 } ) $
Z sub g of lambda.	$ Z_g ( \lambda ) $
represents the product of T P and E.	$ represents the TP of ED $
the pair consisting of the average of x at time t and the average of y at time t.	$ ( \bar x ( t ) , \bar y ( t ) ) $
c times vector E of t equals negative d times vector A of t divided by d t.	$ c\vec { E } ( t ) =-d\vec { A } ( t ) /dt $
j plus one.	$ \left ( j+1\right ) $
T set minus e	$ T\setminus e $
nine point three plus or minus zero point two.	$ 94.3\pm0.2 $
y equals x minus L sub 2 plus L sub 1.	$ y = x - L_2 + L_1 $
d approximately equal to sine theta	$ d~\sin \theta $
G sub 2 is a subset of G sub 1.	$ G_2\subseteq G_1 $
s is greater than s sub zero.	$ s > s_0 $
delta sub i for i in I sub n.	$ \ { \delta_ { i } \ } _ { i\in I_ { n } } $
Spoken: d sub n belongs to the set of negative one, zero, one.	$ d_n\in\ { -1,0,1\ } $
zero point zero three three plus or minus zero point zero zero one.	$ 0.033 \pm 0.001 $
v sub infinity, L infinity	$ ( v_ { \infty } , L_ { \infty } ) $
t equals t sub 0.	$ t = t_ { 0 } $
delta sub s of k	$ \delta_ { s ( k ) } $
Phi of h equals f sub I star h.	$ \varphi ( h ) =f_I \ast h $
m l equals 1	$ ml=1 $
Tau equals 13.	$ \tau=13 $
alpha sub i superscript open parenthesis 1 close parenthesis	$ \alpha_i^ { ( 1 ) } $
i is similar to j.	$ i { \sim } j $
phi raised to the power of A of t	$ \phi^A ( t ) $
Sigma sub alpha alpha equals one.	$ \sigma_ { \alpha\alpha } =1 $
eta	$ \rho , \eta $
S sub sigma superscript g comma s.	$ \mathcal { S } _ { \sigma } ^ { g , s } $
M equals negative five halves.	$ M=-\frac { 5 } { 2 } $
u belongs to X to the power of 1 of I	$ u\in X^ { 1 } ( I ) $
I sub sigma superscript star.	$ I_ { \Sigma } ^ * $
R sub c c.	$ R_ { cc } $
Phi equals phi sub zero plus dot dot dot plus phi sub zeta minus one.	$ \phi = \phi_0 + \cdots + \phi_ { \zeta-1 } $
sign of c sub n equals negative one raised to the power of n.	$ \text { sign } ( c_n ) = ( -1 ) ^ { n } $
Nu of r and lambda of r	$ \nu ( r ) \ \text { and } \ \lambda ( r ) $
v divided by omega sub c equals 0.33	$ v/\omega_ { c } \ ! =\ ! 0.33 $
Two to the power of n to the power of k minus two is less than exponential of n to the power of k minus two.	$ 2^ { n^ { k-2 } } < \exp ( n^ { k-2 } ) $
Delta Mean P divided by Delta x.	$ \Delta \text { MeanAP } / \Delta x $
zero point three one five point seven four i	$ 0.351-5.74i $
open parenthesis x sub 1 comma x sub 2 comma x sub 3 comma y sub 1 comma y sub 3 comma y sub 3 close parenthesis.	$ ( x_1 , x_2 , x_3 , y_1 , y_3 , y_3 ) $
The X sub 12 of A sub 1, multiplied by M sub 2.	$ \mathcal { X } _ { 12 } [ A_1 ] M_2 $
U, open parenthesis, 1, close parenthesis, subscript, L	$ U\left ( 1\right ) _ { \cal L } $
f sub 2n superscript s, f sub n, k superscript a	$ f_ { 2n } ^s , f_ { n , k } ^a $
L sub 2.	$ \mathfrak { L } _2 $
H of s equals C times the inverse of s times I minus A, multiplied by B, plus D.	$ H ( s ) : = C ( sI - A ) ^ { -1 } B + D $
Log of 1.05 times 10 to the power of 7.	$ \log { 1.05\cdot 10^7 } $
A dagger equals A.	$ A^\dag=A $
d plus of x equals 1	$ d^+ ( x ) = 1 $
Absolute value of V raised to the sharp power, greater than or equal to 1.	$ |V^ { \sharp } |\geq 1 $
Theta i is defined as the composition of F star i with the negation of the transpose of J to the power of i.	$ \theta_i : =F^ * _i\circ ( -J^ { i\top } ) $
c sub 2 raised to the power of x sub 0	$ c_2^ { [ x_0 ] } $
one point zero seven M sub solar mass.	$ 1.07M_ { \odot } $
zero point zero zero two plus or minus zero point zero six three.	$ 0.002\pm0.063 $
p of u given v	$ p ( u|v ) $
Four point one seven sub negative zero point zero eight superscript plus point four four.	$ 4.17_ { -0.08 } ^ { +0.44 } $
G belongs to the set containing G sub 1, dot dot dot, G sub d plus 1.	$ G\in \ { G_1 , \dots , G_ { d+1 } \ } $
zero point one four plus or minus zero point three.	$ 0.41\pm 0.03 $
a is less than or equal to C times b.	$ a\leqslant C b $
M sub h greater than zero	$ M_h > 0 $
c sub e superscript a equals c sub e superscript a comma k.	$ c_ { e^a } = c_ { e^a , k } $
The dimension of W sub 1 equals the dimension of W sub 2 equals K.	$ \dim ( W_1 ) =\dim ( W_2 ) =K $
minus mode.	$ -mode . The $
J equals ten squared gamma.	$ J=10^2\gamma $
Negative seven point six one three x sub one.	$ -7.6132x_1 $
M equals M sub c.	$ M ( =M_c ) $
Open parenthesis, S cubed minus S, close parenthesis intersect Gamma.	$ ( S^3-S ) \cap \Gamma $
omega sub zero of zero	$ \omega_0 ( 0 ) $
S sub q of pi.	$ S_q ( \pi ) $
Alpha sub N.	$ \alpha_ { N } $
Approximately 220.	$ \sim220 $
phi of o, phi of o prime	$ \phi ( o ) , \phi ( o ' ) $
P sub k of n.	$ P_k ( n ) $
The natural logarithm of X equals C sub 0 plus the integral of chi of X, Y, dt.	$ ln X = C_0 +\int \chi ( X , Y ) dt $
Tau of x sub 1 equals y prime wedge x sub 1.	$ \tau ( x_1 ) = y ' \wedge x_1 $
Rho sub K sub 2 open parenthesis lambda sub 2 close parenthesis equals 1.	$ \rho_ { K_2 } ( \lambda_2 ) = 1 $
L sub 2 equals 20.2.	$ L_ { 2 } =20.2 $
langle sigma sub z comma i rangle.	$ \langle \sigma_ { z , i } \rangle $
tau sub C E	$ \tau_\text { CE } $
W to the power of H.	$ W^H $
u of x equals u sub CBF,1 of x	$ u ( x ) = u_ { \text { CBF } ,1 } ( x ) $
X sub zero open parenthesis 74 close parenthesis divided by w sub 37.	$ X_0 ( 74 ) /w_ { 37 } $
ninety-six point three four.	$ 96.43 $
S H raised to the power of 0, M, L raised to the power of k.	$ SH^0 ( M , L^ { k } ) $
G of x, y, v sub i plus one, v sub i plus two.	$ G [ \ { x , y , v_ { i+1 } , v_ { i+2 } \ } ] $
A to the power of a.	$ \mathcal { A } ^a $
Angle Phi, pipe, Omega, angle equals zero.	$ \langle \Phi | \Omega \rangle = 0 $
three point one five five plus or minus zero point zero two five.	$ 3.512 \pm 0.028 $
eff of a, b, d, R	$ f ( a , b , d , R ) $
O sub K, S equals Z	$ \mathcal { O } _ { K , S } =\mathbb { Z } $
T raised to the power of T G R.	$ T^ { TRG } $
O equals open parenthesis X, Z, Z C, Y close parenthesis.	$ O= ( X , Z , ZC , Y ) $
c sub z greater than zero	$ c_z > 0 $
f composed with w.	$ f \circ w $
dee of E semicolon F equals zero.	$ d ( E ; F ) =0 , $
f sub i, maps from the complex numbers to the complex numbers.	$ f_i : \mathbb { C } \mapsto \mathbb { C } $
R to the power of 3mn	$ \mathbb { R } ^ { 3mn } $
X sub max equals X of sigma prime of t sub 0	$ X_ { \max } =X ( \sigma ' ( t_0 ) ) $
P belongs to the set of m	$ P\in\lg { m } $
j to the power of infinity sub x.	$ j^\infty_x $
q, negative q	$ q , -q $
T sub s equals 280.	$ T_ { s } = 280 $
Fraction one over omega to the power of the absolute value of E of z.	$ \frac { 1 } { \omega^ { |E ( z ) | } } $
zero point zero eight sub nine point five.	$ 0.08_ { 9.5 } $
l sub j equals p sub j plus q sub j.	$ l_j=p_j+q_j $
k-hat plus T.	$ \hat k+T $
Four hundred eighty with a lower limit of negative fourteen and an upper limit of positive nine.	$ 480_ { -14 } ^ { +9 } $
Negative 2.91 plus or minus 0.43.	$ -2.91\pm0.43 $
k equals 512	$ k=512 $
( 1, 0 ), ( 0, 1 ), a, b	$ ( 1,0 ) , ( 0,1 ) , ( a , b ) $
t sub d comma i	$ t_ { d , i } $
Max sub i divided by n sub zero.	$ \max_in_i / n_0 $
z sub zero equals one point two five five.	$ z_0=1.257 $
Two gamma sub one comma one equals G sub one comma one equals rho sub one.	$ 2\gamma_ { 1,11 } =G_ { 1,1 } =\rho_1 $
r sub min is greater than zero.	$ r_ { \text { min } } > 0 $
Z of S sub j minus 1, comma, S sub j minus 1.	$ Z ( S_ { j-1 } , S_ { j } -1 ) $
Five times P sub three halves.	$ |e > ( 5P_ { 3/2 } ) $
L sub n, open parenthesis, sigma, close parenthesis.	$ L_n ( \sigma ) $
N raised to the power of p sub n, evaluated at gamma sub n.	$ N^p_ { n } ( \gamma_n ) $
Subscript 14.83 Superscript 17.94	$ _ { 14.83 } ^ { 17.94 } $
Theta equals four-thirds times the quantity one plus k epsilon.	$ \theta = 4/3 \cdot ( 1 + k \varepsilon ) $
mu sub R equals mu sub F equals m sub U.	$ \mu_R=\mu_F=m_U $
one minus n to the power of negative sixteen.	$ 1-n^ { -16 } $
g raised to the power of 2, open parenthesis p, close parenthesis, similar to 1.	$ g^ { 2 } ( p ) \sim 1 $
Gamma sub f 6 equals 1.	$ \gamma_ { f6 } =1 $
Degree of Q is less than q.	$ \deg ( Q ) < q $
Tau belongs to M raised to the power of P.	$ \tau\in M^\P $
P of K prime given G prime	$ P ( K'|G ' ) $
D epsilon equals eta epsilon D	$ D_\varepsilon : = \eta_\varepsilon D , $
F of x is equal to H f nabla h	$ { F ( x ) : = ( Hf ) \nabla h } $
The integral of n of z equals rho sub 0 greater than 0.	$ \int n ( z ) = \rho_0 > 0 $
Sigma sub i succ sigma sub j.	$ \sigma_i \succ \sigma_j $
k equals b divided by 4g.	$ k=\frac { b } { 4g } $
s sub i sub 0 equals positive one.	$ s_ { i_0 } =+1 $
c sub g prime equals six c sub g divided by the square root of sigma.	$ c_g'=6c_g/\sqrt { \sigma } $
omega sub K minus 1 belongs to the interval from 0 to 1.	$ \omega_ { K-1 } \in ( 0,1 ) $
nu plus is greater than nu minus.	$ \nu_+ > \nu_- $
a sub zero of x equals c sub zero of x equals b sub d of x equals zero	$ a_0 ( x ) =c_0 ( x ) =b_d ( x ) =0 $
ell sub ell one to the power of m	$ ( \ell , \ell_1^m ) $
M greater than 100 M sub solar mass	$ M > 100 M_\odot $
nine point six five zero	$ 95.658 $
t equals tau divided by the square root of T.	$ t=\frac { \tau } { \sqrt { T } } $
z equals P sub theta sub P open parenthesis F sub theta sub F open parenthesis x close parenthesis close parenthesis	$ z = P_ { \theta_P } ( F_ { \theta_F } ( x ) ) $
h equals 4.95	$ h= 4.95 $
f belongs to L sub Phi.	$ f \in L_ { \Phi } $
C sub i h, pi sub 1	$ C_ { ih } ( \pi_1 ) $
1is approximately equal to m sub h divided by 2.	$ M_ { S_1 } \sim \frac { m_h } { 2 } $
Z sub k minus 1 equals Y sub m minus 1.	$ Z_ { k-1 } = Y_ { m-1 } $
The norm of A sub 2 equals sigma max of A.	$ \| A \|_2 = \sigma_ { \text { max } } ( A ) $
Norm of d sub t u raised to the power of 1, squared.	$ \|d_t u^1\|^2 $
Beta belongs to the set of B, closed interval 0 to 1.	$ \beta \in \mathcal { B } ( [ 0,1 ] ) $
q equals 4 times t squared plus 1.	$ q=4t^2+1 $
X comma A.	$ ( X , A ) $
a of x is greater than zero, x belongs to V set minus x naught.	$ a ( x ) > 0 , x\in V\setminus\ { x^0\ } $
44.16 plus or minus 0.06	$ 44.16\pm0.06 $
Two not divides L.	$ 2\nmid \ell $
tau sub V belongs to	$ \tau_ { V } \in $
twenty point two five plus or minus zero point zero one.	$ 20.28 \pm 0.01 $
f of d of t equals e to the power of negative d of t in the interval 0 to 1.	$ f ( d ( t ) ) = \exp ( -d ( t ) ) \in ( 0,1 ] $
N comma M equals open parenthesis 4, 3 close parenthesis.	$ ( n , m ) = ( 4,3 ) $
J of the exponential of x	$ J ( \exp_x ) $
rho equals one minus gamma mu in the interval from zero to one, inclusive.	$ \rho = 1-\gamma \mu \in ] 0,1 ] $
q is proportional to one divided by n to the power of zero plus delta n.	$ q \propto 1/ ( n^ { ( 0 ) } + \delta n ) $
The value of chi sub b2, open parenthesis, 6 cubed times P sub 2, close parenthesis.	$ \chi_ { b2 } ( 6^3P_2 ) $
rho sub C approximately 0.5	$ \rho_C\approx 0.5 $
D sub K L of dot	$ D_ { KL } ( \cdot ) $
V open square bracket i sub 1, i sub 2, dot dot dot, i sub n close square bracket.	$ V [ i_1 , i_2 , \cdot\cdot\cdot , i_n ] $
f sub A1	$ f_ { A1 } $
One divided by the square root of T.	$ \frac { 1 } { \sqrt { T } } $
C Z sub j, k	$ CZ_ { j , k } $
sigma, eta sub i j star	$ ( \sigma ( \eta_ { ij } ^ * ) ) $
A times x plus v equals y.	$ Ax + v = y $
n equals d minus d prime.	$ n=d-d'. $
S of P, S of Q	$ S ( P ) , S ( Q ) $
gamma sub open square bracket c comma d close square bracket.	$ \gamma_ { | [ c , d ] } $
Epsilon sub v.	$ \epsilon_ { v } $
G colon N equals four.	$ |G : N|=4 $
t hat sub v r.	$ \hat { t } _ { vr } $
i equals zero, one, dot dot dot, N squared L squared minus one.	$ i=0,1 , \ldots N^ { 2 } L^ { 2 } -1 $
Zero belongs to the set of S of f.	$ 0\in \check { S } ( f ) $
Exponential of i lambda p-bar M	$ \exp \ { i \lambda \bar { p } \hat { M } \ } $
g of l equals zero.	$ g ( l=0 ) $
m sub U is greater than or equal to 700.	$ m_U\gtrsim 700 $
One equals one over q plus one over r.	$ 1=\frac { 1 } { q } +\frac { 1 } { r } . $
Gamma sub zero, zero equals I.	$ \gamma_ { 0,0 } =I $
cosine of h q is less than zero.	$ \cos ( hq ) < 0 $
e equals 0.35	$ e = 0.35 $
p sub t r	$ p_ { \sf traj } $
j is defined as t of a.	$ j : =t ( a ) $
B sub tau a plus dot minus B sub tau a	$ B_ { \tau_a + \cdot } - B_ { \tau_a } $
epsilon sub zero equals zero point zero five.	$ \epsilon_0=0.05 $
)	$ p_ { X \mid Y } ( \cdot \mid \cdot ) $
x belongs to the open interval from 1 minus epsilon bar to 1.	$ x\in ( 1-\bar { \epsilon } ,1 ) $
z equals u times w.	$ z=uw $
84.32 plus or minus 0.65	$ 84.32 \pm4.65 $
χ equals B squared a divided by open parenthesis Lambda overline D close parenthesis.	$ \chi = B^2 a/ ( \Lambda \overline { D } ) $
n equals 171.	$ n = 171 $
vector R C	$ \vec { RC } $
a sub l minus t minus 1 equals a sub l minus t minus 1.	$ a_ { l-t-1 } = a_ { l-t } -1 $
Delta t equals t sub 1 minus t sub 0.	$ \delta t =t_1 - t_0 $
i less than or equal to m minus 1.	$ i\leq m-1 $
six point one underscore nine point nine.	$ 65.1_ { 3.9 } $
z prime equals infinity	$ z'=\infty $
h sub J belongs to J plus	$ h_J\in J_+ $
Two times R sub 1 minus two times R sub 2.	$ 2 \cdot R_ { 1 } - 2 \cdot R_ { 2 } $
L sub c P I L to the power of min	$ L_ { cPIL } ^ { min } $
n raised to the power of one over D.	$ n^ { 1/D } $
k raised to the power of i, open parenthesis, X sub H, close parenthesis, is a subset of X sub K.	$ k^i ( X_H ) \subseteq X_K $
ell belongs to the open interval from zero to p.	$ \ell \in ( 0,1 , \ldots , p ) $
alloys with respect to the variable.	$ alloys with predicted $
Alpha sub 3, ellipsis, alpha sub n.	$ \alpha_3 , \ldots , \alpha_n $
tau sub a divided by r sub 0 equals 3.3537.	$ \tau_a/r_0=6.3537 $
One is less than alpha which is less than omega sub one.	$ 1 < \alpha < \omega_1 $
d equals 3, c equals 2.	$ d=3 , c=2 $
Mathcal P sub theta open parenthesis t vertical bar tau comma a sub m close parenthesis	$ \mathcal { P } _\theta ( t|\tau , a_m ) $
Alpha sub p equals G times m sub p divided by h-bar c.	$ \alpha_\text { p } =Gm_\text { p } /\hbar c $
H equals zero point nine.	$ H = 0.9 $
Ten to the power of twenty-three point seven three.	$ 10^ { 23.73 } $
a equals 2.	$ a = 2 , $
negative nine point seven seven	$ -9.77 $
0.7 plus or minus 0.10.	$ 0.7\pm 0.10 $
h to the power of q, open parenthesis, lambda prime, semicolon, zero, close parenthesis, greater than zero.	$ h^ { ( q ) } ( \lambda ' ; 0 ) > 0 $
A P S E sub t superscript c y c	$ AGE_t^\text { cyc } $
G sub C superscript k.	$ G_C^k $
c hat sub 2 beta	$ \hat { c } _ { 2\beta } $
Beta sub zero belongs to the set of 2, 0.5.	$ \beta_0 \in\ { 2 , 0.5\ } $
C sub CW.	$ C_ { CW } $
Nabla sub n comma p	$ \nabla_ { n , p } $
h sub k, B sub ell	$ ( h_kB_\ell ) $
dimension of F equals zero.	$ \dim F=0 $
Curly brace q of n, vertical bar, subscript f of n equals i, curly brace.	$ \ { q ( n ) |_ { f ( n ) = i } \ } $
Sigma sub A, sigma sub B, belongs to M.	$ \sigma_A , \sigma_B \in M $
Zero point one five five is less than or equal to lambda sub Xi is less than or equal to zero point one five.	$ 0.145\lesssim\lambda_ { \Xi } \lesssim0.15 $
phi of x, t sub negative 2n plus 1.	$ \phi ( x , t_ { -2n+1 } ) $
x sub i, i in the set of 1, 2, 3.	$ x_i , i \in \ { 1,2,3\ } $
A raised to the power of eta sub h.	$ A^ { \eta_h } $
C sub negative equals 0.72.	$ C_- = 0.72 $
dee sub i comma one superscript minus	$ { d_ { i,1 } ^- } $
J double prime alpha	$ J^ { \prime\prime\alpha } $
i equals theta.	$ i = \theta $
s sub i, a sub j plus 1	$ ( s_i , a_ { j+1 } ) $
zero point one two plus or minus zero point one two.	$ 0.12\pm0.12 $
O sub 1 plus infinity	$ O_ { 1 : +\infty } $
w sub zero equals negative zero point nine nine.	$ w_0=-0.99 $
w raised to the power of p sub beta.	$ w^p_\beta $
m sub v belongs to the set of real numbers greater than zero.	$ m_v \in \mathbb { R } > 0 $
Absolute value of lambda is much greater than 1.	$ |\lambda| \gg 1 $
Y sub k plus 1	$ { Y_ { k+1 } } $
C divided by k to the power of 4.	$ C/k^ { 4 } $
s sub 1 to the power of 1.	$ s_1^1 $
p sub 15 equals infinity	$ p_ { 15 } =\infty $
Phi is approximately equal to 28 degrees.	$ \phi \simeq 28^o $
B sub i0, j j.	$ B_ { i0 , jj } $
x greater than or equal to 80	$ x\geq80 $
negative 0.843 raised to the power of double star.	$ -0.8423^ { * * * } $
psi plus or minus one equals negative one.	$ \psi^\pm_1=-1 $
e is much greater than zero.	$ e \gg 0 $
b equals N divided by q sub n.	$ b=\frac { N } { q_ { n } } $
4.3 sub negative 2.8 superscript positive 2.4.	$ 4.3_ { -2.8 } ^ { +2.4 } $
d minus k greater than or equal to 2.	$ d-k\geq 2 $
eta belongs to the open interval from zero to H.	$ \eta\in ( 0 , H ) $
f equals lambda of Y.	$ f = \lambda ( Y ) $
d sub i i is not equal to d sub j j.	$ d_ { ii } \ne d_ { jj } $
C sub 5 open parenthesis 1 comma 2 close parenthesis is isomorphic to K sub 5.	$ C_5 ( 1,2 ) \cong K_5 $
N similar to 1	$ N\sim1 $
P of u of t prime greater than 0 equals 0.	$ P ( u ( t ' ) > 0 ) =0 $
1.810 plus or minus 0.102	$ 1.810\pm0.102 $
h of T sub 2 equals 3 greater than r	$ h ( T_2 ) = 3 > r $
dee of sigma, mu	$ d ( \sigma , \mu ) $
p sub k raised to the power of q of t	$ p_k^q ( t ) , $
w e to the power of plus or minus i 2 phi sub i j	$ w e^ { \pm i 2\phi_ { ij } } $
K star 1410 raised to the power of 0.	$ K^ * ( 1410 ) ^0 $
f sub z phi squared is approximately big O of u squared.	$ f_ { z\varphi } ^2 \sim O ( u^2 ) $
F sub prime.	$ F_ { candidates } $
Negative 8.4763, 7.1663.	$ [ -8.4763 , 7.1663 ] $
E sub C equals 0.41 plus or minus 0.02.	$ E_ { C } = 0.41 \pm 0.02 $
Angle V of C sub 5 intersection I sub 2 is isomorphic to 2 times K sub 1.	$ \langle V ( C_5 ) \cap I_2\rangle\cong 2K_1 $
Sigma of 1, dot dot dot, sigma of m.	$ \sigma ( 1 ) , \dots , \sigma ( m ) $
D equals pi of C.	$ D : =\pi ( C ) $
x prime, t prime.	$ \ { x ' , t'\ } $
B sub 1 superscript 0, B sub 2 superscript 0, ellipsis, B sub m sub 0 superscript 0.	$ B_1^0 , B_2^0 , \ldots , B_ { m_0 } ^0 $
chi tilde equals one.	$ \tilde { \chi } =1 $
Vector f equals open parenthesis f sub x, f sub y close parenthesis.	$ \vec { f } = ( f_x , f_y ) $
Tau sub eta goes to zero.	$ \tau_\eta\rightarrow0 $
x equals m sub pi r	$ x = m_\pi r $
0.7 is less than B minus V, which is less than or equal to 1.1.	$ 0.7 < B-V\leq1.1 $
Chi sub 4 to the power of q of t	$ \chi_4^q ( t ) $
E prime is isomorphic to E.	$ E ' \cong E $
M sub D M superscript B	$ M_ { DM } ^ { B } $
Lambda plus n divided by 2.	$ \lambda+\frac { n } { 2 } $
X sub s comma t union ell	$ X_ { s , t } \cup \ell $
H sub W, 2 to 2 power of P	$ H_ { W,2\to2 } ^ { ( \text { P } ) } $
q sub 1 equals pi open parenthesis p sub alpha close parenthesis	$ q_ { 1 } =\pi ( p_ { \alpha } ) $
q sub bullet superscript negative	$ q_ { \bullet } ^ { - } $
dee sub dee bee.	$ d_ { db } $
Open parenthesis, rho sub zero comma j, close parenthesis, sub one less than or equal to j less than or equal to k.	$ ( \rho_ { 0 , j } ) _ { 1\leq j \leq k } $
H omega to the power of k, T, subset L squared omega to the power of k, T.	$ H\Omega^k ( T ) \subset L^2\Omega^k ( T ) $
X maps to T sub C of X.	$ X\mapsto T_C ( X ) $
A one equals X, B one equals Y.	$ A_1=X , B_1=Y $
two point two mu s	$ 2.2 \mu s $
vector of M and mu	$ Vect ( M , \mu ) $
h equals rho sub delta of g belongs to G sub delta.	$ h = \rho_ { \Delta } ( g ) \in G_ { \Delta } $
less than or approximately equal to ten prime.	$ \lesssim 10 ' $
y sub i belongs to the set of real numbers raised to the power of d sub y.	$ y_i\in\mathbb { R } ^ { d_y } $
T is less than T sub c superscript 1.	$ T < T_ { c } ^ { ( 1 ) } $
One is less than or equal to n, which is less than or equal to N sub G.	$ 1 \leq n \leq N_G $
Delta of the quantity phi	$ \delta ( [ \phi ] ) $
One divided by tau sub S to the power of open parenthesis in charge close parenthesis is approximately equal to P.	$ { 1/\tau_S^ { \text { Incoh . } } \approx P } $
p of x to the power of i, subscript i equals 1 to N.	$ \ { p ( x^ { ( i ) } ) \ } _ { i=1 } ^N $
E sub k belongs to Sigma to the power of delta sub lambda, alpha.	$ E_k\in \Sigma^\delta_ { \lambda , \alpha } $
u belongs to V set minus S	$ u\in V\setminus S $
l is less than j, and j is less than or equal to N minus 2.	$ \ell < j\leq N-2 $
Delta sub g, x open parenthesis E close parenthesis.	$ \Delta_ { g , x } ( E ) $
x equals 0.18.	$ x = 0.18 $
Theta to the power of N.	$ \theta^N $
the derivative of M sub 1 with respect to E sub 1 is not equal to zero.	$ \text { d } M_1/\text { d } E_1\neq0 $
x belongs to the interval from 1 to n.	$ x\in [ 1 , n ] $
kappa sub j.	$ \ { \kappa_ { j } \ } $
two to the power of negative r k.	$ 2^ { -rk } $
R sub outer equals 0.53125.	$ R_ { outer } { = } 0.53125 $
sub k superscript open parenthesis eta close parenthesis	$ \psi _ { k } ^ { ( \eta ) } $
The inverse of exponential of c sub j.	$ \exp_ { c_j } ^ { -1 } $
Maximize over pi, f of pi of y, equals one.	$ \max_ { \pi } f ( \pi ( y ) ) = 1 $
0.76 plus or minus 0.10	$ 0.76 \pm 0.10 $
p sub asterisk equals open parenthesis three minus h squared close parenthesis divided by twelve.	$ p_ { \ast } = ( 3-h^2 ) /12 $
S is a subset of B of w.	$ S\subseteq B ( w ) $
center dot raised to the power of negative one.	$ ( \cdot ) ^- $
N sub r h.	$ N_ { rh } $
F subscript g.	$ { \mathscr { F } _g } $
p much greater than 0.05	$ p \gg 0.05 $
zero point six three plus or minus zero point zero nine direct sum.	$ 0.63\pm0.09\oplus $
C minus U times V.	$ means that C-UAV $
x, y, z belong to the set of complex numbers.	$ x , y , z\in\mathbb { C } $
t equals plus or minus L times the quantity one minus the square root of one minus n divided by L.	$ t=\pm L ( 1-\sqrt { 1-n/L } ) $
B comma phi.	$ ( B , \phi ) $
f inverse of x goes to pi sub zero of f inverse of x	$ f^ { -1 } ( x ) \to\pi_0 ( f^ { -1 } ( x ) ) $
Z sub 1 equals b to the power of negative 1, c sub S sub 1, b.	$ Z_1=b^ { -1 } c_ { S_1 } b $
Delta i minus mu, divided by sigma.	$ ( \Delta i - \mu ) / \sigma $
a sub 1 r divided by a sub 2 is less than zero.	$ { a_1r/a_2 < 0 } $
Kernel pi is a subset of V sub 0 prime.	$ \ker \pi \subseteq V_0^\prime $
Partial N superscript I.	$ \partial_N^I $
Approximately four times ten to the power of negative four.	$ \approx 4 \cdot 10^ { -4 } $
Theta of log T.	$ \Theta ( \log T ) $
I sub V k.	$ I_ { V_k } $
Omega sub n comma p superscript diff.	$ \Omega_ { n , p } ^ { \text { ( diff ) } } $
Pi of t given v	$ \pi ( t|_v ) $
H-bar S to S	$ \hbar { \cal { S } } \to { S } $
d eta equals a to the power of negative one of t times d t.	$ d\eta =a^ { -1 } ( t ) dt $
One point zero zero six eight e plus zero zero.	$ 1.0068e+00 $
Angle bracket, gamma of s, comma, T prime of s, angle bracket, equals negative one.	$ \langle \gamma ( s ) , T ' ( s ) \rangle =-1 $
The quantity Q sub T is equal to 100 times Q.	$ Q_T = 100Q $
S raised to the power of tr.	$ S^ { tr } $
E sub pi, i equals 1 to n.	$ E_ { pi } , i=1 ... n $
tilde u star belongs to the set of real numbers raised to the power of c.	$ \tilde { u } _ * \in \mathbb { R } ^c $
f belongs to the set D of Q sub O1, mu1.	$ f \in D ( Q_ { O_1 , \mu_1 } ) $
Three F sub one.	$ 3F_1 $
D sub xi comma i equals 1	$ D_ { \xi , i } { = } 1 $
U sub j equals Phi sub k sub L inverse of U prime sub j.	$ U_j : = \Phi_ { k_L } ^ { -1 } ( U'_j ) $
Alpha sub s of m sub z.	$ \alpha_s ( m_Z ) $
1.615 sub negative 0.17 superscript positive 0.034	$ 1.615_ { -0.017 } ^ { +0.034 } $
rho sub xy.	$ \rho_ { xy } $
h sub i h sub j h sub k equals 1.	$ h_ih_jh_k = 1 $
eh en alpha minus one	$ n \alpha - 1 $
0.520 plus or minus 0.126	$ 0.520\pm0.126 $
Fourty-one raised to the power of plus twelve hundred thirty-six subscript negative two hundred eighty.	$ 481^ { +1236 } _ { -280 } $
The equation sigma is unique.	$ , the solution is unique on $
0	$ I_ { c,2 } ^ { ( 0 ) } $
Tau sub u sub 2 to the power of negative infinity f.	$ \tau_ { u_2 } ^ { -\infty } f $
tilde x sub Phi sub 1	$ \tilde { x } _ { \Phi_ { 1 } } ^ { } $
Zero point zero three three.	$ 0.033 $
the interval from zero to two pi, including zero but excluding two pi.	$ ( 0,2 \pi ] $
A sub ga.	$ A_ { ga } $
open parenthesis, entity, comma, atomic action, close parenthesis.	$ ( entity , atomic\ action ) $
f star equals the sum from j equals 1 to max of a sub j f hat sub j star	$ f^ * =\sum_ { j=1 } ^m a_j \hat { f } _j^ * $
a equals six divided by seven.	$ a = 6 / 7 $
Z modulo Z sub 2.	$ \mathbb { Z } /\mathbb { Z } _ { 2 } $
The angle bracket Phi, average, equals f.	$ \langle \Phi \rangle = f $
dee cubed are over dee ee arr dee omega.	$ d^3R/dE_R d\Omega $
M sigma	$ M \sigma $
S-G-L	$ ( SGD ) $
tilde S sub 1 asterisk	$ \tilde S_ { 1 } ^ { \ast } $
v sub 1 prime	$ v_ { 1 } ' $
7.25 plus or minus 0.14	$ 7.25 \pm 0.14 $
C hat sub H.	$ \hat { C } _H $
B of z equals the absolute value of a times z plus a divided by 3.	$ B ( z ) = |az + \frac { a } { 3 } | $
gap of f sub zero equals zero.	$ \mathsf { gap } ( f_0 ) = 0 $
mu sub k l	$ \mu _ { kl } $
g sub 1, g sub 2, dot dot dot, g sub B	$ g_1 , g_2 , \dots , g_B $
Big O of n to the power of negative one-half	$ O ( n^ { -1 / 2 } ) $
absolute value of I sub K	$ [ |I_K| ] $
g, h belong to the set Gamma prime.	$ g , h \in \Gamma ' $
i minus 2, i	$ ( i-2 , i ) $
e sub sub sub	$ e_ { \text { sub } } $
Delta equals open parenthesis delta sub 1, comma delta sub 2 close parenthesis.	$ \delta= ( \delta_ { 1 } , \delta_ { 2 } ) $
d sub 1 of x, y equals d sub 2 of f of y, f of x.	$ d_1 ( x , y ) = d_2 ( f ( y ) , f ( x ) ) $
C of K to A sub i.	$ C ( K ) \to A_i $
angle U, comma B	$ \langle U , B\rangle $
The absolute value of B sub k equals the absolute value of S sub k divided by n, greater than 1.	$ |B_k|=\frac { |S_k| } { n } > 1 $
D sub p superscript 2 of X	$ D_ { p } ^ { ( 2 ) } ( X ) $
x sub p, r is less than or equal to x sub p, r	$ x_ { p , r } \leq x_ { p , r } $
e sub i j equals one.	$ { { e } _ { ij } } =1 $
( b divided by v ) raised to the power of h.	$ ( b/v ) ^h $
P sub 4 plus 2 P sub 4.	$ P_4+2P_4 $
X to the power of 0 equals the set containing empty set.	$ X^ { 0 } = \ { \emptyset\ } $
Delta greater than or equal to zero point two.	$ \delta \gtrsim 2.0 $
E prime sub F.	$ E_F ' $
T sub Omega approximately two h divided by J sub xy equals twenty-six.	$ T_\Omega \sim 2 h/J_ { xy } = 26 $
R sub Y times X.	$ R_ { Y } X $
d equals the square root of lambda squared minus two gamma zero lambda.	$ d=\sqrt { \lambda^2-2\gamma_0\lambda } $
r equals lambda divided by one plus lambda times b.	$ r = \frac { \lambda } { 1+\lambda } b $
kay times two to the power of kay minus one minus one	$ k ( 2^ { k-1 } -1 ) $
Q sub 0, Q sub 1, Q sub 2, Q sub 3, Q sub 4, Q sub 5.	$ Q_0 , Q_1 , Q_2 , Q_3 , Q_4 , Q_5 $
Y equals the intersection of X and A sub p.	$ Y=X\cap A_p $
V sub i superscript z	$ V_i^z $
j sub z z equals open parenthesis K plus 2 Gamma close parenthesis divided by 3 k sub B T.	$ j_ { zz } = ( K+2\Gamma ) /3k_BT $
E sub A times E sub B equals E sub R equals E sub A times E sub B.	$ E_AE_B=E_R=E_AE_B $
eff of en, vee, e	$ f ( n , v , e ) $
a with superscript asterisk subscript m equals a with subscript m double prime minus e with subscript m.	$ a^ * _m=a_m '' -e_m $
h sub 2 belongs to the set S sub 2 of S.	$ h_2\in \sf { S } _ { 2 } ( S ) $
t sub B prime, u sub B prime, zero.	$ [ t_ { B ' } : u_ { B ' } :0 ] . $
X prime tilde	$ \tilde { X^ { ' } } $
P equals V.	$ P=V $
Sigma raised to the power of k times p, evaluated at t.	$ \sigma^ { kp } ( t ) $
Phi sub C equals zero point zero twelve.	$ \phi_C=0.012 $
Nabla squared f sub i of x equals A sub i.	$ \nabla^ { 2 } f_ { i } ( x ) =A_ { i } $
N equals N sub L plus N sub R equals N tilde.	$ N=N_\text { L } +N_\text { R } =\tilde { N } $
f theta equals f negative theta	$ f_\theta=f_ { -\theta } $
psi sub 2 of x sub 2	$ \psi_2 ( x_2 ) $
p equals 0.77	$ p=0.77 $
Tau sub 1 equals open parenthesis A plus x, empty set, C, D close parenthesis.	$ \tau_1= ( A+x , \emptyset , C , D ) $
Delta Sigma.	$ \Delta { \Sigma } $
f of m squared is less than f of m minus 1 times f of m plus 1.	$ f ( m ) ^2 < f ( m-1 ) f ( m+1 ) $
E of Y given X.	$ E ( Y|X ) $
Open parenthesis, y or not y, close parenthesis.	$ ( y \vee \neg y ) $
arbitrary dee.	$ arbitrary users delegate to $
The norm of R sub 1 is much less than 1.	$ \|R_1\| \ll 1 $
L equals k of z sub i comma u.	$ L=k ( z_i , u ) $
omega tilde sub 2 of t.	$ \tilde { \omega } _2 ( t ) $
Negative zero point five zero plus or minus zero point zero two.	$ -0.50 \pm 0.02 $
H one of S three minus f of G goes to the set of integers.	$ H_1 ( S^3-f ( G ) ) \to\mathbb { Z } $
q of z sub t given z sub s	$ q ( z_t|z_s ) $
h maps from s to r.	$ h\ : s \to r $
plus or minus t sub p	$ \pm t_ { pp } $
Q raised to the power of X sub 0 intersect Q of 3.	$ Q^ { X_0 } \cap Q ( 3 ) $
rho sub mu, sigma of E.	$ \rho_ { \mu , \sigma } ( E ) $
w sim w double prime sim 90	$ w\sim w^ { \prime\prime } \sim 90 $
s, n, u	$ ( s , n , u ) $
V sub hat pi of x is less than or equal to V of x.	$ V_ { \hat { \pi } } ( x ) \leq V ( x ) $
Open parenthesis theta, comma x, close parenthesis, maps to y.	$ ( \theta , x ) \mapsto y $
Angle a, subscript t.	$ \langle a \rangle_t $
P raised to the power of i j.	$ P^ { ij } $
tau sub sat equals sigma sub sat divided by M.	$ \tau_ { sat } = \sigma_ { sat } /M $
Chi squared times the quantity a prime plus b prime equals gamma chi squared times the quantity b prime plus a prime.	$ \chi^ { 2a'+b ' } = \gamma \chi^ { 2b'+a ' } $
L inverse J inverse L minus I.	$ L^ { -1 } J^ { -1 } L-I $
e to the power of i times the quantity E minus E prime times t.	$ e^ { i ( E-E ' ) t } $
j belongs to the set of integers from 1 to n minus 1.	$ j\in\ { 1 , \cdots , n-1\ } $
i plus one belongs to S of Q	$ i+1 \in S ( Q ) $
x equals plus or minus 10.	$ x = \pm 10 $
Lambda equals one over kappa greater than zero.	$ \lambda = \frac { 1 } { \kappa } > 0. $
Rho goes to nu sub beta superscript rho.	$ \rho \rightarrow \nu_\beta^\rho $
Minus forty-five, minus thirty-nine point five.	$ -45 , -39.5 , $
R xi sub 1 plus dot dot dot plus R xi sub n equals R	$ R\xi_1+\dots+R\xi_n=R $
w sub g equals M sub g	$ w_g=M_g $
8 times the quantity 1 plus 4 times sigma sub s g squared equals 40.	$ 8 ( 1 + 4 \sigma_ { sg } ^2 ) = 40 $
Union over k less than or equal to m, beta sub k.	$ \bigcup_ { k\leq m } \beta_k $
Nu, mu belong to the set of H to the power of d.	$ \nu , \mu \in \mathbb { H } ^d $
Lambda equals log, open parenthesis, m, v sub 0, L, close parenthesis.	$ \Lambda = \log ( m v_0 L ) $
W minus X.	$ W-X $
a naught dot.	$ \dot a_0 $
C raised to the power of g is less than or equal to B	$ C^g \leq B $
r in open bracket 7 divided by 16, 9 divided by 16 close bracket	$ r \in [ 7/16 , 9/16 ] $
P equals p sub i plus k sub i.	$ P=p_i+k_i $
f bar sub i j of x equals y.	$ \overline { f_ { ij } } ( x ) = y $
H-bar times omega sub p g.	$ \hbar\omega_ { pg } $
proportional to m times T.	$ \propto mT $
C minus y sub r	$ C-y_ { r } $
Eta belongs to C zero infinity of R squared.	$ \eta \in C_0^\infty ( \mathbb { R } ^2 ) $
H of i is greater than H of j.	$ H ( i ) > H ( j ) $
Nabla squared sub d	$ \nabla^2_d $
for fixed cell radius	$ ( for fixed cell radius $
v sub i h	$ v_ { ih } $
1.2 plus or minus 0.8	$ 1.2\pm0.8 $
Y sub epsilon superscript n	$ Y_ { \epsilon } ^ { ( n ) } $
8.965	$ 8.965 $
norm of the derivative of gamma with respect to time.	$ \|\dot { \gamma } \| $
o sub i equals 2 t zero tau z	$ o_i=2t_0\tau_z $
kappa is less than or approximately equal to 0.2.	$ \kappa\lesssim 0.2 $
x equals x plus.	$ x=x_+ $
absolute value of G sub alpha	$ \vert G_ { \alpha } \vert $
Absolute value of C equals three k plus one.	$ \vert C\vert= 3k+1 $
mu sub l, ZOA, sigma sub l, ZOA	$ \mu_ { l , ZOA } , \sigma_ { l , ZOA } $
R squared equals zero.	$ R^2 = 0 $
delta divided by, absolute value of S, absolute value of A.	$ \delta / ( |S||A| ) $
U sub p equals U sub infinity cosine theta.	$ U_p = U_\infty \cos { \theta } $
Gamma R S to Gamma R T to T.	$ \Gamma_R S\to \Gamma_R T\to T $
C sub j is a subset of O of 2.	$ C_j\subset O ( 2 ) $
J eta sub mu of zero	$ J/\eta_\mu ( 0 ) $
Pi maps X to B.	$ \pi : X \to B $
s belongs to Sigma sub zero comma v	$ s \in \Sigma_ { 0 , v } $
C to the power of T sub 11 equals B to the power of T sub 11 plus p.	$ C^T_ { 11 } =B^T_ { 11 } +p $
G of W, tilde W	$ G ( W , \tilde W ) $
K sub X squared equals zero.	$ K_X^2 =0 $
W raised to the power of i sub 1, dot dot dot, w raised to the power of i sub 2 alpha.	$ ( w^i_1 , \ldots , w^i_ { 2\alpha } ) $
Two m of n plus three equals three to the power of n.	$ 2m ( n ) +3 = 3^n $
f of phi, G	$ f ( \phi ) \cal G $
R to the power of on, sub i.	$ R^ { on } _i $
u raised to the power of Tu equals one.	$ u^Tu = 1 $
negative eight point eight nine plus or minus zero point zero six.	$ -8.89\pm0.06 $
Z to the power of n of t	$ Z^ { ( n ) } ( t ) $
z sub i minus z sub v.	$ ( z_i - z_v ) $
a sub n is asymptotically equivalent to b sub n.	$ a_n \asymp b_n $
Open parenthesis, script G, comma, tilde A, close parenthesis.	$ ( \mathcal { G } , \tilde { A } ) $
W sub zero raised to the power of r, p, in parentheses, D sub a semicolon K.	$ W_0^ { r , p } ( \mathcal { D } _a ; K ) $
v belongs to N of v sub 1, v sub 2	$ v\in N ( \ { v_1 , v_2\ } ) $
D prime equals psi star of D.	$ D'=\psi_ * ( D ) $
f, f prime, g, g prime belong to C sub c of X.	$ f , f ' , g , g ' \in C_c ( X ) $
knot minus point.	$ , the knot-point , with $
Plus or minus zero point four four seven seven five minus one point four four two three nine two i.	$ \pm 0.64478757 - 1.14423829 i $
eta sub j equals negative one.	$ \eta_j=-1 $
T sub j, zero, superscript w.	$ T_ { j,0 } ^ { w } $
f sub x superscript i is equivalent to the derivative of x sub i with respect to N.	$ f_x^i \equiv \frac { d x_i } { dN } $
s plus g	$ s+g $
6 squared times P one-half times F equals 3.	$ 6^2P_ { 1/2 } F { = } 3 $
nu sub i superscript s	$ \nu_ { i } ^ { s } $
N sub k superscript j	$ \mathcal { N } _k^j $
c equals zero point five.	$ c = 0.5 $
tar is greater than or equal to S sub T times y sub 0.	$ tar\geq S_T y_0 $
Gamma equals G of the set of integers.	$ \Gamma = G ( \mathbb { Z } ) $
B sub 3 comma 3 subset B sub 1 comma 1.	$ B_ { 3,5 } \subset B_ { 10,1 } $
H sub Delta superscript ell comma k open parenthesis chi close parenthesis.	$ H_ { \Delta } ^ { ( \ell , k ) } ( \chi ) $
X of t sub j minus X of t sub j minus 1, j equals 2 to k.	$ X ( t_j ) -X ( t_ { j-1 } ) , j=2\ldots , k $
c sub s times x raised to the power of p sub s.	$ c_sx^ { p_s } $
S zero, ellipsis, S sub m plus n.	$ \ { S_0 , \ldots , S_ { m + n } \ } $
The inverse of the hat Omega is equal to the hat V raised to the power of n.	$ \hat \Omega^ { -1 } = \hat V^n $
eh.	$ withe $
Gamma sub zero B plus Gamma sub DE	$ \Gamma_ { 0B } +\Gamma_ { DE } $
3.91 plus or minus 0.04.	$ 3.91 \pm 0.04 $
m equals 0.2.	$ m = 0.2 $
norm of the partial derivative with respect to alpha of psi	$ \Vert \partial^ { \alpha } \psi\Vert $
four times the quantity M plus N.	$ 4 ( M+N ) $
L sub P to the negative t	$ L_P^ { -t } $
E sub pi.	$ \mathbb { E } _ { \pi } $
r sub km greater than zero.	$ r_ { km } > 0 $
Epsilon sub i j superscript plus equals one.	$ \epsilon_ { ij } ^+=1 $
h delta plus h open parenthesis j minus 1 close parenthesis open parenthesis delta plus 1 close parenthesis plus 1	$ h\delta+h ( j-1 ) ( \delta+1 ) +1 $
S raised to the power of In subscript i.	$ S^ { In } _i $
P equals P sub c bar inverse.	$ P=P_ { \bar { c } } ^ { -1 } $
i belongs to the intersection of set A and set B.	$ i \in A\cap B $
72.9 plus or minus 3.2	$ 72.9\pm3.2 $
a belongs to the closure of A	$ a\in\overline { \mathcal { A } } $
i sub 1 equals negative 1.	$ i_1=-1 $
X Y equals Z T.	$ XY=ZT $
p belongs to the set of a sub i, b sub j, w sub i j.	$ p\in\lbrace a_i , b_j , w_ { ij } \rbrace $
ell is equivalent to ell prime.	$ \ell \leftrightarrow \ell ' $
f sub 1 equals open parenthesis 2 divided by 3 close parenthesis f sub AC	$ f_ { 1 } = ( 2/3 ) f_ { _ { AC } } $
Phi star beta minus alpha.	$ \Phi^ * \beta-\alpha $
g equals the determinant of g sub mu nu	$ g : =\det ( g_ { \mu\nu } ) $
Pi times chi sub p.	$ \pi ( \chi_p ) $
E one is a subset of the script F.	$ E_1 \subseteq \mathcal { F } $
L to the power of 3 equals L to the power of 1.	$ L^ { ( 3 ) } =L^ { ( 1 ) } $
mu alpha equals the integral of g alpha d lambda.	$ \mu_\alpha=\int g_\alpha d\lambda $
six nine plus or minus six zero five.	$ 697\pm605 $
B equals 16.2.	$ B=16.2 $
P sub b open parenthesis 1/2 comma 1/2 raised to the power of negative comma 11.34 close parenthesis.	$ P_ { b } ( 1/2,1/2^-,11.314 ) $
84.81 sub 0.34.	$ { 84.81 } _ { ( 0.34 ) } $
determinant of lambda, mu, delta is greater than zero.	$ \det ( \lambda , \mu , \delta ) > 0 $
The absolute value of M intersection Gamma sub 4 superscript out of 1 is equal to 24 plus 6i.	$ |M \cap \Gamma_ { 4 } ^ { out } ( 1 ) |=24+6i $
m sub v equals 3.	$ m_v = 3 $
open parenthesis, x minus r, close parenthesis, raised to the power of p.	$ ( x-r ) ^p $
approximately twelve thousand thirty-four.	$ \approx 1234 $
P sub y of x bar	$ P_y ( \bar x ) $
H sub zero superscript s	$ H_ { 0 } ^ { ( s ) } $
p sub 3 of x equals x cubed minus c times x squared plus a squared times x minus b squared.	$ p_3 ( x ) =x^3-cx^2+a^2 x-b^2 $
Superscript plus point zero zero six, subscript minus point zero zero one.	$ ^ { +0.006 } _ { -0.001 } $
e raised to the power of negative gamma divided by sigma.	$ e^ { -\frac { \gamma } { \sigma } } $
Pi belongs to Pi subgeq 2 of j sub 1, dot dot dot, j sub m.	$ \pi\in\Pi_ { \geq 2 } ( j_1 , \ldots , j_m ) $
Z to the power of theta of s	$ Z^ { \vartheta ( s ) } $
Q equals 60.	$ Q=60 $
S squared V sub N	$ S^2 V_N $
Three log of m divided by alpha squared divided by eta m.	$ 3\log ( m/\alpha^2 ) / ( \eta m ) $
epsilon equals one hundred and three.	$ \epsilon=103 $
Gamma sub z equals negative a times t.	$ \gamma_z=-\tanh t $
two point four zero seven one eight one.	$ 2.4087188 $
e of j sub q is not in f sub q.	$ e ( j_q ) \notin f_q $
r belongs to the set of integers with subscript plus	$ r \in \mathbb { Z } _ { ++ } $
Limit as sigma approaches zero of TT prime.	$ \lim_ { \sigma\downarrow 0 } TT ' $
sub n p.	$ _ { np } $
g of r	$ g ( r ) . $
minus band dot	$ -band images , where the $
Beta sub max equals 180 degrees.	$ \beta_ { max } =280^ { o } $
K, open square bracket, W sub J, close square bracket.	$ K [ W_J ] $
zero point zero one six zero three.	$ ( 0.016 , -0.003 ) $
Negative 2.10 plus or minus 0.32.	$ -2.10 \pm 0.32 $
b of R equals negative m divided by open parenthesis 24m plus 36 close parenthesis.	$ b ( R ) =-m/ ( 24m+36 ) $
gcd of k, q plus 1 equals 1.	$ \gcd ( k , q+1 ) =1 $
r equals one over m.	$ r=1/m $
T of rho equals rho	$ T ( \rho ) = \rho $
c equals lambda u in C.	$ c = \lambda u \in C $
w sub asterisk open parenthesis tilde z comma z close parenthesis equals zero.	$ w_\ast ( \tilde { z } , z ) = 0 $
t equals four s.	$ t=4\ , s $
Phi sub k equals phi minus N to the power of k minus 1.	$ \phi_k=\phi-\mathcal { N } ^ { ( k-1 ) } $
N to the power of negative one-third times v sub N,1 goes to zero.	$ N^ { -1/3 } v_ { N,1 } \to 0 $
X equals the set of x star, x sub 0, x sub 1, ellipsis.	$ X=\ { x^ * , x_0 , x_1 , \ldots \ } $
t sub z bar	$ t_ { \overline { z } } $
ab a equals a.	$ aba=a $
p of w sub s t	$ p ( w_ { st } ) $
two point seven zero seven	$ 2.707 $
P implies O	$ P \rightarrow O $
Open parenthesis, y sub i, close parenthesis, subscript 1 less than or equal to i less than or equal to N.	$ ( y_i ) _ { 1\leq i\leq N } $
n belongs to the interval from negative N sub f to N sub f minus 1.	$ n \in \left [ -N_f , N_f-1\right ] $
T sub i is defined as S sub i minus 1 union S sub i plus 1.	$ T_i : =S_ { i-1 } \cup S_ { i+1 } $
The absolute value of I sub j equals the absolute value of I sub k.	$ |I_j| = |I_ { k } | $
zero point eight eight nine.	$ 0.8849 $
Lambda is greater than a divided by 2.	$ \Lambda > \frac { a } { 2 } $
c raised to the power of negative delta, maps to T prime.	$ c^- : \Delta \to T ' $
Alpha sub one equals sixty.	$ \alpha_1 = 60 $
Mu equals negative n minus j minus epsilon.	$ \mu=-n-j-\epsilon , $
Sigma r equals the set of 1.5 to the power of k, such that k equals 0, 1, 2, dot dot dot, 14.	$ \sigma_r=\ { 1.5^k\mid k=0,1,2 , \dots,14\ } $
Theta equals Theta sub zero times sine of omega sub a t.	$ \Theta=\Theta_0 \sin ( \omega_a t ) $
D given f equals nu.	$ |D|f=\nu $
log q of phi divided by p of phi.	$ \log q [ \phi ] /p [ \phi ] $
j equals 1, dot dot dot, L minus 1.	$ j=1 , ... , L-1 $
total temperature at fan inlet.	$ ( total temperature at fan inlet ) , $
s lambda to the power of negative b.	$ s\lambda^ { -b } $
A less than or equal to B less than or equal to A.	$ A \lesssim B \lesssim A $
s raised to the power of the quantity m sub k minus m sub k minus 1, all of that acting on i.	$ s^ { \ast } _ { m_ { k } -m_ { k-1 } } ( i ) $
Phi of T sub w of tau comma 1, R sub 1.	$ \Phi ( T_ { w ( \tau,1 ) } R_1 ) $
Approximately 0.3 times the reciprocal of ell sub s.	$ \sim 0.3 \ell_s^ { -1 } $
h, zero, ell.	$ ( h,0 , \ell ) $
Theta of 0 comma xi equals xi.	$ \Theta ( 0 , { \xi } ) = { \xi } $
Lambda equals ten, nu equals five.	$ \lambda = 10 , \nu = 5 $
a sub zero equals zero point one five point six nine.	$ a_0 = 201.69 $
r precedes f.	$ r \prec f $
Bar M belongs to M.	$ \bar { M } \in M $
f sub psi, open parenthesis, xi sub 1, close parenthesis.	$ f_\psi ( \xi_1 ) $
Sum from n equals 1 to the absolute value of C sub n squared equals 1.	$ \sum^ { \infty } _ { n=1 } |C_n|^2=1 $
Open parenthesis V close parenthesis greater than b.	$ ( V ) > b $
Vector T sub k.	$ \vec { T } _k $
Alpha sub 1 superscript T sub 1 equals alpha sub 2 superscript T sub 2.	$ \alpha_ { 1 } ^ { T_1 } = \alpha_2^ { T_2 } $
Pi up arrow pi	$ \Pi^ { \uparrow } ( \pi ) $
Gamma sub B 0 raised to the power of i.	$ \gamma_ { B \,0 } ^i $
v sub 4 of P squared	$ v_4 ( \P^2 ) $
pi of x, four, three.	$ \pi ( x ; 4,3 ) $
Tangent of beta is equivalent to v sub u divided by v sub d.	$ \tan\beta \equiv { v_u } / { v_d } $
u less than or equal to v less than or equal to phi	$ u\leq v\leq \phi $
Sigma to the power of alpha sub j maps to sigma to the power of alpha sub negative j.	$ \sigma^\alpha_j \mapsto \sigma^\alpha_ { -j } $
c raised to the power of E greater than c raised to the power of L.	$ c^ { E } > c^ { L } $
H plus L	$ H + L $
S squared sub h, j.	$ S^2_ { h , j } $
Z sub 0 is a subset of the union of F prime and the closure of C.	$ Z_ { 0 } \subseteq F'\cup C^ { * } $
Open parenthesis x sub 1 comma x sub 3 comma x sub 4 comma x sub 5 comma x sub 6 close parenthesis goes to 0.	$ ( x_1 , x_3 , x_4 , x_5 , x_6 ) \to 0 $
beta to the power of one sub i comma zero.	$ \beta^1_ { ( i,0 ) } $
twenty-four point six six two one.	$ 24.6621 $
Nu is equivalent to delta sub c squared of z divided by sigma squared sub M.	$ \nu\equiv \delta_c^2 ( z ) /\sigma^2_M $
c sub 0, ellipsis, c sub n.	$ ( c_0 , \ldots , c_n ) $
k sub i minus 2 m sub i	$ k_i-2m_i $
S equals the intersection over i in J2 of S sub i.	$ S=\cap_ { i\in J_2 } S_i $
Pi sub theta belongs to Pi sub Theta.	$ \pi_\theta\in \Pi_\Theta $
pi sub i minus D sub i	$ \pi_i-D_i $
V of P intersection X is a subset of the set containing u and v.	$ V ( P ) \cap X \subseteq \ { u , v\ } $
n sub factorial	$ n_ ! $
c equals one divided by the quantity Q minus two times alpha.	$ c = 1/ ( Q-2\alpha ) $
m sub 1 superscript nu is much less than m sub 2 superscript nu is much less than m sub 3 superscript nu	$ m_1^\nu \ll m_2^\nu\ll m_3^\nu $
F sub k plus 1, sub q to the power of F sub n minus k plus 1.	$ [ F_ { k+1 } ] _ { q^ { F_ { n-k+1 } } } $
0 is less than or equal to d, which is less than or equal to D.	$ 0\leq d \leq D $
bee, raised to the power of independently.	$ can be bounded independently of $
1.1, -1: One point one, negative one.	$ 1,1 , -1 $
c greater than the absolute value of d.	$ c > |d| $
V sub 2 of H sub n	$ V_2 ( H_n ) $
Gamma, open parenthesis, t sub 0, comma, t sub 1, close parenthesis, is a subset of s.	$ \gamma ( [ t_0 , t_1 ] ) \subset s $
Epsilon divided by k sub B T equals one hundred.	$ \varepsilon/k_B T = 100 $
b belongs to B, i belongs to I.	$ b \in B , i \in I $
Open parenthesis, c sub 2 plus rho, close parenthesis, tilde w open parenthesis, x comma t close parenthesis.	$ ( c_2+\rho ) \tilde { w } ( x , t ) $
i equals zero, dot dot dot, N sub j	$ i = 0 , \ldots , N_j $
R sub k, lambda	$ R_ { k , \lambda } $
Zee T of ten to the fifteenth power.	$ \mathbb { Z } T ( 10,15 ) $
x dot equals f of x.	$ \dot x = f ( x ) $
Curly bracket, x sub n open parenthesis t close parenthesis, close curly bracket, sub n.	$ \ { x_n ( t ) \ } _n $
Tau sub W equals D inverse times x sub 0 squared.	$ \tau_ { W } =D^ { -1 } x_0^2 $
subscript 2, center dot subscript 13,45.	$ _2 \ , \bullet_ { 13,45 } $
J sub alpha i is a subset of J sub alpha k.	$ J_ { \alpha_i } \subseteq J_ { \alpha_k } $
Psi of x is defined as K times phi of x.	$ \psi ( x ) \equiv_K\phi ( x ) $
z belongs to the interval from negative w sub c to w sub c.	$ z\in [ -w_c , w_c ] $
Sigma is less than B sub i of t sub A minus B sub i of t sub B.	$ \sigma < B_ { i } ( t_A ) -B_ { i } ( t_B ) $
p bar b 2	$ \overline { pb_2 } $
Epsilon is greater than or equal to zero point nine seven.	$ \epsilon \geq 0.97 $
t star equals zero point one	$ t^ * =0.1 $
phi sub I of Omega.	$ \varphi_I ( \Omega ) $
sigma subset C.	$ \sigma \subset C $
U less than or equal to X less than or equal to V.	$ U\leq X\leq V $
Negative one point eight three plus or minus zero point one two.	$ -1.83\pm0.12 $
t sub r equals 1.	$ t_r=1 $
T sub p g plus T sub 1, T sub p g plus T sub 2.	$ [ T_ { pg } + T_1 , T_ { pg } + T_2 ] $
h of k equals h of k plus k zero.	$ h ( k ) =h ( k+k_0 ) $
Alpha belongs to the open interval from 1 to d.	$ \alpha \in ( 1 , d ) $
14.8 plus or minus 1.8	$ 14.8 \pm 1.8 $
n times Q belongs to v.	$ \vec n \cdot Q \in v $
O sub F, O sub F plus	$ O_F , O_F^+ $
Negative 0.225146	$ -0.225146 $
C plus 1.	$ ( C+1 ) $
One minus exponential negative Lambda sub t tau divided by two.	$ 1-\exp ( -\Lambda_t\tau/2 ) $
T inverse of t equals negative natural logarithm of one minus F of t.	$ T^ { -1 } ( t ) =-\ln ( 1-F ( t ) ) $
mu sub zero w.	$ \mu_ { 0w } $
x is less than n divided by 2.	$ x < n/2 $
Lambda succeeds equal to zero.	$ \Lambda\succeq 0 $
u equals v, belongs to U.	$ u=v\in U $
T equals T alpha sub zero, nu, N sub one, N sub two.	$ T = T ( \alpha_0 , \nu , N_1 , N_2 ) $
y belongs to the set Y without the element 0.	$ y \in Y\setminus \lbrace 0 \rbrace $
L T equals four.	$ LT=4 $
n equals 2 to the power of k plus 1	$ n = 2^ { k } + 1 $
sigma bar.	$ \bar { \varsigma } $
Gamma sub A equals one over k sub A.	$ \gamma_A = \frac { 1 } { k_A } $
p sub 1 equals open parenthesis zero, zero, one close parenthesis.	$ p_1 = ( 0,0,1 ) $
K belongs to the set of T sub h.	$ K \in \mathcal { T } _h $
s is less than zero.	$ ( s ) < 0 $
m is less than or equal to the fraction n divided by 2.	$ m \leq \frac { n } { 2 } $
a times the square root of omega squared minus mu squared	$ ( a\sqrt { \omega^2-\mu^2 } ) $
a raised to the power of sigma, multiplied by the quantity four pi squared nu squared a squared minus t squared.	$ a^\sigma ( 4\pi^2\nu^2 a^2 - t^2 ) $
V of P O	$ V ( PO $
x belongs to W sub a.	$ { x\in W_a } $
kappa of E equals zero.	$ \kappa ( E ) = 0 $
5.30890 raised to the power of 1.14626, with a lower uncertainty of 1.49933.	$ 5.30890^ { + 1.14626 } _ { - 1.49933 } $
ellipsis, subscript L	$ ( \cdots ) _L $
binomial coefficient 230 choose 11	$ \binom { 230 } { 11 } $
sigma of one, two, four	$ \sigma ( 1,2,4 ) $
131ms, 121ms, 142ms.	$ 131ms,121ms,142ms $
c raised to the power of gamma sub p greater than zero	$ c^\gamma_p > 0 $
C is equal to the set of C sub 1, C sub 2, dot dot dot, C sub d.	$ \mathcal { C } =\ { C_1 , C_2 , ... , C_d\ } $
tilde x of vector n, t	$ \tilde { x } ( \vec { n } , t ) $
t sub 0 raised to the power of q	$ t_0^q $
Approximately twenty.	$ \approx 20 $
f less than or equal to k	$ f\leq k $
dot r minus.	$ \dot r_- $
z goes to negative one over e.	$ z\rightarrow -1/e $
F sub r phi equals b partial sub r rho	$ F_ { r\phi } =b\partial_ { r } \rho $
E sub 2 equals 10.	$ E_2=10 $
A sub 1 dot dot dot a sub n	$ Aa_1 .. a_n $
k belongs to the interval from 0 to k maximum, and k belongs to the set of natural numbers.	$ k\in [ 0 , k_ { \max } ) , k\in\mathbb { N } $
one point one three three	$ 1.813 $
Twenty-two point one squared plus or minus.	$ 22.1^2\pm $
Eight g.	$ { 8g } $
R equals negative 32 pi Lambda.	$ \mathscr { R } =-32\pi\Lambda $
natural logarithm of delta.	$ \ln\delta $
Alpha is not equal to zero.	$ \alpha\not=0 $
oh of n to the power of one minus zero point zero zero five.	$ o ( n^ { 1/3-0.0005 } ) $
k is less than g of n	$ k < g ( n ) $
Y sub 1, X sub 1, Z sub 1.	$ ( Y_1 , X_1 , Z_1 ) $
X sub T F	$ X_ { TF } $
four over seven	$ \dfrac { 4 } { 7 } $
wide hat a of xi comma x equals a of x comma xi	$ \widehat { a } ( \xi , x ) = a ( x , \xi ) $
2x times P sub z.	$ 2xP_z $
eleven point seven seven two four	$ 11.5724 $
The integral over M of double prime omega equals the integral over M of omega.	$ \int_M \omega '' = \int_M \omega. $
C sub l of delta nu, subscript T.	$ [ C_ { \ell } ( \Delta \nu ) ] _T $
Y equals G backslash T.	$ Y= G\backslash T $
d belongs to the set of 2, dot dot dot, 28	$ d\ , \in\ , \ { 2 , \ , ... , \,28\ } $
x sub n plus 1 equals x sub 1 plus L.	$ x_ { n+1 } : =x_1+L $
micrometer squared per second.	$ \mu m^2/s $
open parenthesis r, capital theta, phi, close parenthesis	$ ( r , \Theta , \phi ) $
ket y, bra y	$ |y \rangle\ ! \langle y| $
One point one three four nine times ten to the power of negative ten.	$ 1.18349 \cdot 10^ { -10 } $
Absolute value of M sub k of omega is less than or equal to S to the power of t.	$ |M_k ( \omega ) | \leq S^t $
M-hat sub delta t.	$ \hat { \mathcal { M } } _ { \delta t } $
dee sub s equals absolute value of s.	$ d_s=|s| $
rho times the quantity N minus one equals one.	$ \rho ( \mathcal { N } -1 ) =1 $
u belongs to the complex numbers raised to the power of n.	$ u\in\mathbb { C } ^ { n } $
z: n to K	$ z : [ n ] \to [ K ] $
M prime.	$ M^ { ' } $
kappa to the power of MSM.	$ \kappa^ { { SM } } $
G of r is proportional to e raised to the power of negative m r.	$ G ( r ) \propto \exp ( -mr ) $
Zero raised to the power of dagger i.	$ 0^ { \dagger i } $
d p equals ten	$ dp=10 $
l sub t star	$ l_ { t } ^ { * } $
V equals s sub 1.	$ V=s_1 $
L comma L prime	$ [ \ell , \ell ' ] $
P greater than 500	$ P > 500 $
rho sub s divided by rho sub g	$ \rho_s/\rho_g $
2561: Two thousand five hundred sixty-one	$ 2561 $
V raised to the power of 1 equals W.	$ V^1 = W $
Epsilon sub theta phi equals one.	$ \varepsilon_ { \theta \phi } = 1 $
one sub n, one sub zero	$ 1_n , \,1_0 $
n sub o much greater than Omega sub s	$ n_o\gg \Omega_s $
i sub 3 equals i sub 1.	$ i_3=i_1 $
Big O of phi to the power of eight.	$ \mathcal { O } _ { \phi^8 } $
2Q equals 6Q equals 10Q equals 14Q dot dot dot.	$ 2Q = 6Q = 10Q = 14Q \dots $
Q of Omega sub 1 is greater than or equal to 2 epsilon.	$ Q ( \Omega_ { 1 } ) \geq 2\epsilon $
ell maps from zero to infinity to zero, one.	$ \ell : ( 0 , \infty ) \to ( 0,1 ] $
d equals o of the logarithm of n divided by n times the logarithm of the logarithm of n.	$ d=o ( \frac { \log n } { n \log \log n } ) $
Kappa sub h equals kappa sub c equals zero point zero zero five.	$ \kappa_h = \kappa_c=0.005 $
D prime equals K zero e one.	$ D ' : =K_0 e_1 $
Imaginary part of s to the power of zero sub n of x equals zero.	$ \Im s^0_n ( x ) = 0 $
Zero times infinity equals zero.	$ 0\cdot\infty = 0 $
Pi sub p of t equals pi sub p of t sub n.	$ \pi_p ( t ) =\pi_p ( t_n ) $
v minus negative psi, W prime	$ v- ( -\psi ) \ , W ' $
Gamma subset tilde Gamma.	$ \Gamma \subset \tilde\Gamma $
Open parenthesis, capital Y, comma, capital Omega raised to the star, close parenthesis.	$ ( Y , \Omega^ * ) $
o sub 1, o sub 2 belongs to Ops.	$ o_ { 1 } , o_ { 2 } \in Ops $
Mu to the power of k plus one equals rho mu to the power of k.	$ \mu^ { ( k+1 ) } =\rho\mu^ { ( k ) } $
epsilon sub r equals 11.45	$ \epsilon_r=11.45 $
c sub 1 plus c sub 2 plus u equals 1	$ c_1+c_2+u=1 $
belongs to a complex number.	$ belongs to an induced $
mu sub k equals m sub k divided by M sub sun.	$ \mu_k=m_k/M_\odot $
eight eight point four	$ 889.04 $
Negative zero point zero zero four plus or minus zero point zero two four.	$ -0.004 \pm 0.024 $
Alpha sub 13 greater than 0.	$ \alpha_ { 13 } > 0 $
u of t sub m goes to u sub infinity prime	$ u ( t_m ) \to u_\infty ' $
sixty point eight two	$ 60.82 $
E sub M	$ \mathscr { E } _ { M } $
the set S superscript u sub t.	$ |\mathcal { S } ^u_t| $
G set minus u.	$ G\setminus u $
Alpha sub i belongs to the set of integers.	$ \alpha_ { i } \in \mathbb { Z } $
nine point nine eight nine four	$ 3.9809943 ( 4 ) $
i is greater than or equal to i sub v.	$ i\geq i_v $
b raised to the power of eta of x equals b raised to the power of theta of x plus c.	$ b^ { \eta } ( x ) = b^ { \theta } ( x ) +c $
f sub i comma d	$ f_ { i , d } $
A is greater than 2.	$ A > 2 $
G sub L squared s to the power of 4.	$ G_L^2 s^4 $
Approximately 1594 kilocalories.	$ \approx1594kcal $
C raised to the power of 1, comma, alpha.	$ C^ { 1 , \ , \alpha } $
k is less than l.	$ k < l $
Phi sub ell superscript star, in open parenthesis, 2 pi minus omega divided by 2, comma, 2 pi, close parenthesis.	$ \phi_\ell^\star \in ( 2\pi - \omega/2,2\pi ) $
x sub 2 equals x sub f.	$ x_2=x_f $
zero point three two six plus or minus zero point zero four three.	$ 0.326\pm 0.043 $
N sub lmsq.	$ N_ { lmsq } $
B sub a equals tau sub a.	$ B_a = \tau_a , $
m raised to the power of x sub r	$ m^ { x } _ { r } $
right arrow sub zero one.	$ \rightarrow_ { 01 } $
B prime to P one.	$ B'\to\P^1 $
L sub sigma of i degrees.	$ L_ { \sigma ( i ) } ^\circ $
Delta x equals zero point zero two times c divided by omega p.	$ \Delta x=0.02~c/\omega_p $
absolute value of psi squared	$ \vert\psi\vert^2 $
1542808.2	$ 1542808.2 $
q of g equals q of g inverse times 1 sub G	$ q ( g ) =q ( g^ { -1 } 1_G ) $
Omega goes to negative Omega.	$ \Omega\to-\Omega $
c not in L to the power of three minus i, s sub three minus i.	$ c \notin L^ { 3-i } ( s_ { 3-i } ) $
One over w plus a times one minus one over w.	$ 1/w + a ( 1 - 1/w ) $
e plus N yields e prime plus X	$ e + N\rightarrow e ' + X $
absolute value times absolute value subscript H sub 1	$ || \cdot ||_ { H_1 } $
4.02 sub negative 0.05 superscript positive 0.04.	$ 4.02_ { -0.05 } ^ { +0.04 } $
0.2248, sub 0.0431.	$ { 0.2248 } _ { 0.0431 } $
N sub b of u intersect N sub b of v equals empty set	$ N_b ( u ) \cap N_b ( v ) =\emptyset $
A times e sub 2.	$ A ( e_2 ) $
degree star	$ \digamma^ * $
A sub p, ell	$ A_ { p , \ell } $
eight point six six seven e minus four.	$ 8.6079e-04 $
H transpose	$ H^T $
L a M minus 65 B	$ \mathtt { LLaMA-65B } $
k sub peak	$ k_ { \text { peak } } $
0.994 raised to the power of positive 0.042, sub 0.042.	$ 0.994^ { +0.042 } _ { -0.042 } $
The set of the hat T sub n, for n greater than or equal to 1.	$ \ { \widehat { T } _ { n } \ } _ { n\geq 1 } $
B is a subset of R.	$ \mathcal { B } \subset\mathbb { R } $
tau less than 73 point 33.	$ \tau < 73.33 $
x sub 1, dot dot dot, x sub n minus m	$ \ { x_1 , \dots , x_ { n-m } \ } $
empty set raised to the power of zero equals empty set.	$ \emptyset^ { ( 0 ) } { = } \emptyset $
U is a subset of P to the power of n minus 1.	$ U \subseteq \P^ { n-1 } $
K subscript max equals 7.	$ K_ { \max } = 7 $
Three M divided by R.	$ 3M/R $
x, y belong to M sub-ell star.	$ x , y \in M_\ell^ * $
omega sub 13 C	$ \omega_ { 13\text { C } } $
the derivative of f with respect to v equals v prime.	$ \d f_p ( v ) =v ' $
zero point six minus zero point three i	$ 0.6-0.3 i $
D belongs to F of Omega.	$ D\in F ( \Omega ) $
zeta sub 5 equals 1.036927755 dot dot dot.	$ \zeta_5=1.036927755\cdots $
two point three plus or minus two point zero.	$ 23.3 \pm 26.0 $
q hat raised to the power of n	$ \widehat { q } ^ { ( n ) } $
G sub zero of q squared	$ G_0 ( q ) ^2 $
n sub 1 is less than negative 4.	$ n_1 < -4 $
negative two nine seven seven six eight divided by two.	$ \frac { -297756989 } { 2 } $
plus x l s cosine of col plus 1 plus '	$ '+xlscol ( col+1 ) + ' $
W superscript plus or minus subscript a	$ W^ { \pm } _a $
P sub 4 plus 2 times P sub 4 plus 5 times P sub 3 plus 10 times P sub 4.	$ P_4+2P_4+5P_3+10P_4 $
H epsilon.	$ \mathfrak { H } _\epsilon $
E sub c negative q equals E sub c q.	$ E_c ( -q ) =E_c ( q ) $
M over m	$ M/m $
H greater than or equal to one-sixth.	$ H \geq \frac { 1 } { 6 } $
vee-s of any two divides s.	$ of the vectors of any two vertices gives the $
Q sub s equals 0.0152.	$ Q_s=0.0152 $
Tau is less than tau sub D.	$ \tau < \tau_D $
Left angle bracket, capital I, subscript lambda, right angle bracket.	$ \left\langle I_\lambda \right\rangle $
v equals plus or minus one divided by the square root of t.	$ v=\pm1/\sqrt { t } $
Sigma sub k to Sigma.	$ \Sigma_k\to\Sigma $
Phi belongs to L squared of G.	$ \varphi\in L^2 ( G ) $
g sub t equals F of x sub t	$ g_t= F ( x_t ) $
X to the power of infinity sub 2n minus 1, open parenthesis, negative T sub 2n, 2n plus 1, close parenthesis.	$ X^\infty_ { 2n-1 } ( -T_ { 2n,2n+1 } ) $
E sub k raised to the power of N plus 1.	$ E_k^ { N+1 } $
F prime union P set minus V of F sub t	$ F'\cup ( P\setminus V ( F_t ) ) $
lambda sub u, zero	$ \lambda_ { { u } ,0 } $
s circle P of the boundary of M raised to the power of alpha	$ ( s \circ P ( \partial M^\alpha ) ) $
a sub 1 x sub 1 plus a sub 2 x sub 2 plus dot dot dot plus a sub n x sub n in 0.	$ a_1 x_1 + a_2 x_2 + \cdots + a_n x_n \ni 0 $
d sub g of x, y is less than or equal to 2 to the power of negative k.	$ d_g ( x , y ) \leq 2^ { -k } $
v times a equals v times y plus v times x greater than rho times v plus v times x.	$ va=vy+vx > \rho_v+vx $
Open parenthesis, F sub 2, close parenthesis, sub C, open parenthesis, x sub k plus 1, close parenthesis, subset, A.	$ ( F_2 ) _C ( x_ { k+1 } ) \subset A $
Pi superscript g subscript i j.	$ \pi^ { ( g ) } _ { ij } $
pi squared sub zero.	$ \pi^2_0 $
36.0 plus or minus 20.7	$ 36.0 \pm 20.7 $
v sub K open parenthesis t comma x close parenthesis	$ v_K ( t , x ) $
I sub A.	$ \text { I } _A $
D equals the product from i equals 1 to g of the pair consisting of r sub i and R sub i.	$ D = \prod_ { i=1 } ^g ( r_i , R_i ) $
k equals 2.	$ k=2 , $
Theta sub f.	$ \theta_f $
z is approximately distributed as 0.1.	$ z \sim 0.1 $
w sub infinity equals zero	$ w_ { \infty } =0 $
x sub 1, x sub 2, x sub m.	$ x_1x_2x_m $
G, V of G, set minus X	$ G [ V ( G ) \setminus X ] $
Sigma is defined as the union of tau and the set containing w.	$ \sigma : = \tau\cup \ { w\ } $
c sub 1, c sub 2, T sub 0 greater than 0	$ c_1 , c_2 , T_0 > 0 $
for simplicity dot in general, a constant	$ for simplicity . In general , a constant $
c sub 1, omega sub d.	$ ( c_ { 1 } , \omega_ { d } ) $
P sub V superscript k	$ P_ { V } ^k $
E equals one-half C V squared.	$ E=\frac { 1 } { 2 } C V^ { 2 } $
e times u sub 1	$ eu_1 $
Delta x to the power of i of lambda.	$ \delta x^i ( \lambda ) $
P sub I circle P sub J prime equals P sub J circle P sub I prime.	$ P_I\odot P_ { J ' } =P_J\odot P_ { I ' } $
50.30 sub 0.81	$ 50.30_ { ( 0.81 ) } $
11.88 plus or minus 0.12	$ 11.88\pm0.12 $
s sub 1 j superscript A sub l plus r sub k j	$ s_ { 1j } ^ { A_ { l } } +r_ { kj } $
vac	$ \text { vac } $
i sub 1 equals i, i sub 2, ellipsis, i sub n equals j.	$ i_1 = i , i_2 , \ldots , i_n = j $
Theta of c times theta of e plus c is not equal to zero.	$ \theta ( c ) \theta ( e+c ) \neq 0 $
H sub one colon T.	$ H_ { 1 : T } $
a b times u times c	$ ab \cdot u \cdot cd $
1 1 plus or minus 0.9	$ 18.1 \pm 0.9 $
r sub k is greater than or equal to r sub star of alpha.	$ r_k\geq r_ { \star } ( \alpha ) $
The logarithm of the average of y times r equals 7.29.	$ \log { Age } ( yr ) = 7.29 $
N p sub three halves	$ Np_ { 3/2 } $
x sub out	$ x_\text { out } $
phi of one, negative i.	$ \phi ( 1 , -i ) $
n of A	$ n ( \mathcal { A } ) $
B sub n, m, evaluated at m equals 1, 2, dot dot dot, greater than B sub n star.	$ B_ { n , m } |_ { m=1,2 , \ldots , } > B_n^ * $
belong to the set of integers.	$ that belong to the same class of $
P sub mu minus P.	$ P_\mu-P $
hat x sub i open parenthesis t sub j close parenthesis	$ \hat { x } _i ( t_j ) $
d sub 1, ellipsis, d sub r greater than or equal to 1.	$ d_1 , \ldots , d_r\geq 1 $
V sub 1111	$ V_ { 1111 } $
67.17 raised to the power of plus 0.65, subscript minus 0.48.	$ 67.17^ { +0.65 } _ { -0.48 } $
lambda equals two tenths.	$ \lambda=2/10 $
Delta equals w times R sub 0.	$ \Delta = w R_0 $
U sub negative k j, m minus j plus k.	$ U_ { -kj , m-j+k } $
zero point six four plus or minus zero point one three.	$ 0.64\pm0.13 $
x sub i is similar to k n n x sub j	$ x_ { i } \sim_ { knn } x_ { j } $
g sub D alpha prime squared minus D divided by 2	$ g^2_ { D } \alpha'^ { 2-D/2 } $
Pi sub proj of dot	$ \Pi_ { proj } ( \cdot ) $
M sub n of E to the power of n.	$ \mathcal { M } _n ( E^n ) $
H sub L O, open parenthesis, z to the power of negative 1, close parenthesis.	$ H_ { OL } ( z^ { -1 } ) $
f of t, x, v equals G sub mu nu of t, x	$ f ( t , x , v ) =G_ { \mu \nu } ( t , x ) $
x sub k plus t.	$ x_ { k+t } $
y equals z equals r equals zero.	$ y = z = r = 0 $
r, u, v	$ ( r , u , v ) $
f sub n to the power of at t.	$ f_n^ @ ( t ) $
phi belongs to L sub nu to the power of y to the power of p of U.	$ \phi \in L_ { \nu^ { y } } ^ { p } ( U ) $
one plus F	$ ( 1+F ) $
e to the power of j	$ e^ { j } $
Math calligraphic E x t squared sub Y open parenthesis j star F comma j star F close parenthesis.	$ \mathcal { E } xt^2_Y ( j_ * F , j_ * F ) $
o prime l not in I to the power of u	$ o'_l \notin \mathcal { I } ^u $
X raised to the power of c.	$ X\to X^c $
sigma sub g equals one.	$ \sigma_ { sg } =1 $
See-Ay. dee, see-Ay. See-Ay.	$ ( \alpha , d , c_A , C_A ) $
Nu sub m star open parenthesis hat y sub m comma y sub m close parenthesis.	$ \nu_ { m } ^ * ( \hat { y } _ { m } , y_m ) $
Phi equals Phi plus cup minus Phi plus.	$ \Phi=\Phi_+ \sqcup -\Phi_+ $
F equals sixteen.	$ F=16 $
Gamma double prime of zero equals gamma to the power of five of zero equals zero.	$ \gamma '' ' ( 0 ) =\gamma^ { ( 5 ) } ( 0 ) =0 $
f of succsim times m sub 1 equals w sub l.	$ f ( \succsim ) ( m_1 ) =w_l $
R sub N equals the quantity 1	$ R_ { N } = [ 1 ] $
Delta sub j superscript z of N.	$ \ { \delta_j^z ( N ) \ } $
X equals X sub beta.	$ X=X_ { \beta } $
B subset the set containing 1, 2, dot dot dot, K squared plus L.	$ B\subset\ { 1,2 , \cdots , K^2+L\ } $
P sub k equals b	$ p_ { ( k ) } = b $
mu equals the real part of the set P, which is equal to the quantity 30 comma 100.	$ \mu = Re \in \mathcal { P } = [ 30,100 ] $
eighteen thousand.	$ 18750 $
epsilon sub opt	$ \epsilon_\text { opt } $
alpha, seven, zero	$ ( \alpha , 7 , 0 ) $
Z sub img.	$ { Z } _ { img } $
Left angle bracket r right angle bracket is approximately equal to 0.3863.	$ \left < r \right > \approx 0.3863 $
v belongs to V of G sub 1 set minus Y sub 1	$ v\in V ( G_1 \setminus Y_1 ) $
em, nu, plus, negative one	$ m ( \nu ) + ( -1 ) $
hat a dagger hat a hat X sub j	$ \hat a^\dag \hat a \hat X_j $
Zero is less than or equal to ell, which is less than or equal to lambda.	$ 0 \leq \ell \leq \Lambda $
U sub i.	$ \mathfrak { U } _i $
E sub p.	$ \mathcal { E } _ { p } $
Theta sub PBC equals pi.	$ \theta_ { \text { PBC } } =\pi $
B to the power of n minus 1 equals 0.	$ B^ { n-1 } =0 $
g prime of S equals g of S intersection q prime	$ g ' ( S ) : = g ( S\cap [ q ' ] ) $
N of D is greater than or equal to 1	$ N ( D ) \geq 1 $
tilde s of v sub 1 equals tilde s of v sub 2	$ \tilde { s } ( v_1 ) = \tilde { s } ( v_2 ) $
u, v belongs to V, u precedes v.	$ u , v\in V , u\prec v $
U sub b b much greater than t sub b.	$ U_ { bb } \gg t_b $
f hat sub alpha beta gamma.	$ \widehat { f } _ { \alpha\beta\gamma } $
h sub f superscript l	$ h_f^l $
j belongs to the set of natural numbers excluding the element 0.	$ j\in\mathcal { N } \backslash\ { 0\ } $
angle tau to the negative angle	$ \langle\tau^-\rangle $
x sub i minus x sub j equals zero.	$ x_i-x_j = 0 $
d sub t plus 1 equals ellipsis equals d sub m equals d minus 1	$ d_ { t+1 } =\ldots = d_m=d-1 $
Q V T of r, k	$ \mathcal { QVT } ( r , k ) $
Q sub c is greater than zero.	$ Q_c > 0 $
f tilde sub 1.	$ \tilde { f } _1 $
y sub j less than or equal to y star	$ y_j \leq y^ * $
minus e sub i plus e sub j.	$ -e_i +e_j $
psi bar of A	$ \overline { \psi ( A ) } $
M sub 11.	$ { \cal M } _ { 11 } $
y belongs to M sub 1	$ y\in ( M ) _1 $
Delta t equals ten to the power of four.	$ \Delta t=10^ { 4 } $
Delta R over R equals h.	$ \frac { \Delta R } { R } = h $
x sub 1 equals delta sub 3	$ x_1=\delta_3 $
Log a equals one.	$ \log a = 1 $
V sub phi star T V sub phi.	$ V_\varphi^ * T V_\varphi $
c times A sub 6	$ cA_6 $
Sigma raised to the power of C F, multiplied by p squared.	$ \Sigma^ { ( \text { CF } ) } ( p^ { 2 } ) $
t equals epsilon p to the power of open parenthesis one plus delta close parenthesis divided by two.	$ t=\epsilon p^ { ( 1+\delta ) /2 } $
sigma equals zero point nine tilde sigma.	$ \sigma=0.9 \tilde \sigma $
0.15, 0.6, 0.92.	$ [ 0.15,0.6,0.92 ] $
Gamma fit.	$ \Gamma_ { fit } $
Xi sub twelve comma three superscript empty set.	$ \xi_ { 12,3 } ^ { } $
Cal F sub 12 open parenthesis p sub 1, p sub 2, p sub 3 close parenthesis.	$ { \cal F } _ { 12 } ( p_1 , p_2 , p_3 ) $
script L sub S of U	$ \mathcal { L } _ { \mathcal { S } } ( U ) $
t equals p times b.	$ t = p b $
A sub l.	$ A_ { \l } $
Epsilon sub A.	$ \varepsilon_A $
e belongs to Lambda raised to the power of s W.	$ e\in \Lambda^s W $
v sub R equals Omega R	$ v_R = \Omega R $
p belongs to the set of P of V, n.	$ p\in\mathcal { P } ( V , n ) $
Z sub Q superscript 1	$ Z_Q^ { ( 1 ) } $
Open parenthesis, w plus 8 z squared, close parenthesis, squared.	$ ( w+8z^2 ) ^2 $
G sub zero superscript v	$ G_0^v $
negative four point five three five.	$ -5.435 $
bee sub eye superscript jay open parenthesis ell close parenthesis	$ b_i^j ( l ) $
U sub 1, ellipsis, U sub k belongs to the special orthogonal group of dimension d.	$ U_1 , \ldots , U_k \in SO ( d ) $
Omega sub negative one, xi.	$ \Omega_ { -1 , \xi } $
one is less than or equal to i.	$ 1\leqslant i $
zero point five two four, subscript negative zero point zero nine, superscript positive zero point zero one two.	$ 0.524_ { -0.009 } ^ { +0.012 } $
A is a subset of V of T.	$ A \subseteq V ( T ) $
0.3 AU.	$ \approx 0.3\text { AU } $
Gamma sub i is less than G sub i.	$ \Gamma _ i < G_i $
X equals delta sub lambda, lambda sub zero.	$ X=\Delta_ { \Lambda , \Lambda_0 } $
W sub 0 approximately 2.73	$ W_ { 0 } \approx 2.73 $
p sub i belongs to X sub 0.	$ p_i\in X_0 $
two plus L	$ 2+L $
56,108: Fifty-six thousand one hundred eight.	$ 56,108 $
L to the power of 8, set minus open brace 0, close brace.	$ L^ { ( 8 ) } \setminus \ { 0\ } $
X large equals x divided by t.	$ X=x/t $
One over ell is much less than T, which is much less than one over x.	$ 1/\ell \ll T \ll 1/x $
y belongs to L sub H	$ y \in L [ H ] $
Theta sub c equals open parenthesis 1.2 tilde 2.8 close parenthesis degrees.	$ \theta_ { c } = ( 1.2\sim2.8 ) ^ { \circ } $
B sub k sub 2 k sub 3 k sub 4	$ B_ { k_2k_3k_4 } $
Gamma maps the interval from 0 to 1 to the set Omega.	$ \gamma : [ 0,1 ] \rightarrow \Omega $
5.2 plus or minus 2.04.	$ 5.2\pm2.14 $
V entails phi raised to the tau	$ V\vdash \phi^\tau $
e sub 2 equals x sub 2 times x sub 4.	$ e_2 = x_2 x_4 $
x greater than 3.	$ x > 3 $
The bar rho of 0 equals 0.463 of 8.	$ \bar { \rho } ( 0 ) =0.463 ( 8 ) $
h, colon, A to the power of d, arrow, B	$ h\colon A^d\to B $
B sub phi, open parenthesis, xi vector, comma, t, close parenthesis.	$ B_\phi ( \vec { \xi } , t ) $
Omega of t goes to negative one.	$ \omega ( t ) \rightarrow-1 $
S sub 1 of L squared of G.	$ S_ { 1 } ( L^2 ( G ) ) , $
U hat sub b.	$ \widehat { U } _b $
e maps from p prime to q prime.	$ e : p'\to q ' $
a prime belongs to S sub i.	$ a ' \in S_i $
u sub one comma one, w sub one	$ ( u_ { 1,1 } , w_1 ) $
K sub G superscript K sub G comma S	$ K_G^SK_ { G , S } $
F sub zero to the power of M F	$ \mathcal { F } _0^ { MF } $
u sub k, subset W	$ ( u_k ) _k\subset W $
X semicolon T sub n, n equals 1, 2, dot dot dot, N.	$ \ { X ; T_n , n=1,2 , \dots , N\ } $
pi not R bar a	$ \pi ( \neg R\bar a ) $
pi one, open parenthesis, capital R sub-ji, close parenthesis, subscript k superscript p.	$ [ \pi_1 ( R_ { ji } ) ] _k^p $
h sub zero divided by the quantity R sub zero squared plus r squared plus T of t squared.	$ h_0/ ( R_0^2+ r^2 + T ( t ) ^2 ) $
fraktur X sub one minus	$ \mathfrak { X } _1^- $
H one is a subset of H.	$ \mathcal { H } _1\subset\mathcal { H } $
negative u sub R is less than zero.	$ -u_R < 0 $
subscript 63.60 superscript 75.90	$ _ { 63.60 } ^ { 75.90 } $
g maps to h of g	$ g \mapsto h ( g ) $
rho sub m superscript c	$ \rho_ { m } ^ { c } $
13.20,440.62.	$ [ 13.20,440.62 ] $
Pi sub i equals pi sub f.	$ \pi_i=\pi_f $
mu sub phi equals 0.4	$ \mu _ { \phi } =0.4 $
E plus or minus k in parentheses.	$ E_ { \pm } ( k ) $
Y sub I open parenthesis epsilon sub m close parenthesis	$ Y_I ( \epsilon_m ) $
C maps the closed interval from 0 to 1 raised to the power of d to the closed interval from 0 to 1.	$ C : [ 0,1 ] ^d \to [ 0,1 ] $
M sub Z sub i divided by M sub A sub I	$ M_ { Z_i } /M_ { A_I } $
S to the power of k.	$ S^k $
Union over f of f of Y of F	$ \bigcup_f f ( Y ( F ) ) $
b belongs to the set of functions W to the power of one to infinity on Gamma, raised to the power of d.	$ b \in [ W^ { 1 , \infty } ( \Gamma ) ] ^d $
equivalent to sub B	$ \equiv_ { \mathcal { B } } $
Lambda of alpha sub t is greater than lambda sub t.	$ \Lambda ( \alpha_t ) > \lambda_t $
Sigma raised to the power of i, subscript 3.	$ \sigma^i_3 $
z equals 15 minus 20.	$ z=15 - 20 $
psi equals s sub 403423.	$ \psi=s_ { 403423 } $
f sub theta not in B open parenthesis f sub asterisk comma epsilon close parenthesis	$ f_\theta \notin B ( f_ * , \varepsilon ) $
Zero less than or equal to zeta sub l, zeta sub r less than or equal to one.	$ 0\leq \zeta_ { l } , \zeta_r\leq 1 $
phi of x equals phi of x prime.	$ \phi ( x ) =\phi ( x ' ) $
Alpha maps V of X to the interval from 0 to 1.	$ \alpha : V ( X ) \to [ 0,1 ] $
M of d sub n equals M sub n plus d.	$ M ( d ) _n = M_ { n+d } $
g equals two r minus two.	$ g=2r-2 $
y prime belongs to X set minus X sub P.	$ y'\in X\setminus X_P $
Two pi squared h-bar squared divided by m L squared.	$ \frac { 2\pi^2 \hbar^2 } { mL^2 } $
vector v of vector m times vector m transpose	$ \vec v ( \vec m \vec m^T ) $
partial B vector over partial t.	$ \partial \vec { B } / \partial t $
S sub nu.	$ S _ { \nu } $
B minus to ell minus bar nu ell.	$ B^- \to \ell^-\bar { \nu } _\ell $
5.92 raised to the power of positive 0.87, with a lower bound of negative 1.21.	$ 5.92^ { +0.87 } _ { -1.21 } $
R proportional to M sub star to the power of 0.55	$ R\propto M_ * ^ { 0.55 } $
C inverse minus one.	$ C^ { -1 } -1 $
5.90 raised to the power of plus 0.88, sub minus 0.71.	$ 5.90^ { +0.88 } _ { -0.71 } $
zee raised to the power of star sub n.	$ z^\star_n $
one minus psi sub k f	$ ( 1-\psi_ { k } ) f $
Ten to the power of three less than or equal to c sub V less than or equal to ten to the power of five.	$ 10^3 \lesssim c_V \lesssim 10^5 $
k	$ \Sigma_ { u_k } = \Sigma_ { x_k u_k } = 0 $
Delta s sub 0.	$ \Delta s_0 $
S sub 1 equals S prime sub 1.	$ S_1=S'_1 $
q sub j belongs to L sub 2	$ q_ { j } \in L_ { 2 } $
s equals plus or minus one	$ s=\pm 1 $
dee tee over dee alpha	$ \frac { dt } { d\alpha } $
A plus t times the quantity K sub X plus B.	$ A+t ( K_X+B ) $
sigma to a mostly triple t.	$ corresponding to a mostly triplet $
omega bar h	$ { \overline { \omega } _h } $
L prime equals L squared.	$ L ' : =L^2 $
w sub 1, dot dot dot, w sub d, belongs to the set of real numbers.	$ w_1 , ... , w_d\in \mathbb { R } $
zero point eight eight plus or minus zero point one five.	$ 0.89 \pm 0.10 $
Pi divided by 2L.	$ \pi/2L $
t less than or equal to k double prime, less than k double prime.	$ t\leq k '' < k ' $
Psi sub n equals psi open parenthesis n comma t close parenthesis.	$ \psi _n = \psi ( n , t ) $
X sub k, where k ranges from 1 to positive infinity.	$ \ { X_ { k } \ } _ { k=1 } ^ { +\infty } $
J equals direct sum from i equals 1 to n of Lambda to the power of i of V.	$ J=\oplus_ { i=1 } ^n\Lambda^i ( V ) $
Psi of dot belongs to S sub m perpendicular.	$ \psi ( \cdot ) \in S_m^ { \perp } . $
C sub s superscript plus-minus.	$ C_s^ { \pm } $
8.45 plus or minus 0.07	$ 8.45 \pm 0.07 $
t not equal to t sub zero	$ t\ne t_0 $
Eta of x equals one-half.	$ \eta ( x ) = \frac { 1 } { 2 } $
R sub j divided by N sub j greater than or equal to 2.	$ R_ { j } /N_ { j } \geq2 $
Curly I is a subset of the set containing the elements 1 through n.	$ { \cal I } \subset \ { 1 , \ldots , n\ } $
43 double prime	$ 43 '' $
Omega, varpi belong to the set of real numbers raised to the power of nu.	$ \omega , \varpi \in \mathbb { R } ^\nu $
x, v, p	$ ( x , v , p ) $
V sub 3 is not a subset of V sub 2 union V sub 1.	$ V_3 \not \subset V_2 \cup V_1 $
E sub U comma i	$ E_ { U , i } $
j sub r not equal to n	$ j_r\neq n $
S beta, tau sub a.	$ S ( \beta , \tau_ { a } ) $
W sub q circle theta 2, p circle theta 1.	$ W_ { q\circ\theta_2 , p\circ\theta_1 } $
ch four u	$ ch4u $
Alpha equals zero point zero zero zero one.	$ \alpha=0.0001 $
E sub negative C equals negative ten point zero zero.	$ E_-^C=-100.0 $
Big O of log ell	$ O ( \log \ell ) $
n equals negative log base beta of the absolute value of Delta plus big O of 1.	$ n=-\log_\beta |\Delta|+O ( 1 ) $
16538 plus or minus 8150	$ 16538\pm8150 $
X sub B sub 3 goes to the bar T dot L	$ X_ { B_3 } \to \overline { T \cdot \L } $
degree B.	$ \deg B $
Gamma zero equals the expected value of the function l of h zero of W sub t.	$ \gamma_0= \mathbb { E } l ( h_0 ( W_t ) ) , $
p sub i j superscript star	$ p_ { ij } ^ * $
dee ell of theta over dee theta sub i	$ dL ( \Theta ) /d\Theta_i $
sufficiently sufficiently dot Fix any	$ is sufficiently large . Fix any $
R equals three.	$ R=3. $
P sub 1 equals ellipsis equals P sub n.	$ P_1 = \dots =P_n $
y to the power of negative one times beta times y equals beta.	$ y^ { -1 } \beta y = \beta $
marginalities.	$ with marginal densities $
of x raised to the power of A.	$ ( x ) ^A $
v prime equals v divided by c	$ v'=\frac { v } { c } $
r equals cosine theta.	$ r=\cos\theta $
m sub u d squared equals mu squared plus m squared.	$ m_ { ud } ^2 = \mu^2+m^2 $
g sub k z to x	$ g_kz \to x $
t sub x belongs to T.	$ t_x\in T $
Phi one is greater than mu.	$ \phi_1 > \mu $
H epsilon.	$ \H_\epsilon $
tilde eta sub 2 greater than 0	$ \tilde { \eta } _2 > 0 $
B equals B sub 2 union B sub 3 union B sub 4 union B sub 7.	$ B=B_2\cup B_3\cup B_4\cup B_7 $
respectively.	$ respectively ) . Since $
14.68 plus or minus 1.47.	$ 14.68 \pm 1.47 $
Open brace, open brace, w superscript i, close brace, subscript 0, close brace, close brace, subscript i.	$ { \ { { w } ^ { ( i ) } _0\ } } _i $
D sub i belongs to the set of real numbers plus	$ D_i\in\mathbb { R } _+ $
T squared is greater than or equal to chi sub p squared of alpha.	$ T^2 \geq \chi_p^2 ( \alpha ) $
A equals E sub i.	$ A=E_i $
0.32 is less than omega and omega is less than or equal to 1.05.	$ 0.32 < \omega \leq 1.05 $
H sub 1, B.	$ \mathcal { H } _ { 1 , B } $
the average of the square of E sub nu.	$ \langle E_\nu^2\rangle $
sim eight five.	$ \sim 8\ ( 5 ) $
Absolute value of x equals the square root of tau sub f squared plus x sub f squared.	$ |x| = \sqrt { \tau_f^2 +x_f^2 } $
Eight point three plus or minus two point eight.	$ 80.3\pm2.8 $
Curly brace, one comma two, ellipsis, d, curly brace, raised to the power of p sub n.	$ \ { 1,2 , ... , d\ } ^ { p_n } $
A is defined as C sub 1 times C sub 2 greater than 0.	$ A : =C_1C_2 > 0 $
s belongs to the set of 1 to h.	$ s \in \ { 1 , \ldots , h\ } $
P sub 0, G sub n.	$ \mathbb { P } _ { 0 , \ ; G_ { n } } $
a sub j, i to the power of negative 1 equals a sub i, j.	$ a_ { j , i } ^ { -1 } = a_ { i , j } . $
M plus equals M minus.	$ M_+=M_- $
p sub t minus 1	$ p_ { t-1 } $
v belongs to T sub p L plus	$ v \in T_p L^+ $
F raised to the power of xi.	$ F^\xi $
L sub DM.	$ \mathcal { L } _ { DM } $
K equals S to the power of one-third equals the sum over m of Z sub m Z sub m.	$ K=S^ { 1/3 } = \sum_m \bar Z_m Z_m $
a sub p superscript open parenthesis u, w close parenthesis	$ a_p^ { ( u , w ) } $
N sub beta is greater than or equal to N divided by 2.	$ n_\beta \geq N/2 $
80 is less than the value of R sub N4816 which is less than 500.	$ 80 < R_ { N4816 } < 500 $
Zero less than or equal to c sub j less than or equal to one.	$ 0\leq c_j \leq 1 $
P is a subset of G.	$ P \subset G $
zeta prime sub A comma B of l.	$ \zeta^ { ' } _ { A , B } ( l ) $
F sub C, 0 raised to the power of a equals F sub C raised to the power of a.	$ F_ { C , 0 } ^a=F_ { C } ^a $
u to the power of nu.	$ u^ { \nu } $
F sub N equals positive infinity.	$ F_N=+\infty $
ell sub one.	$ \ell_ { 1 } $
cos psi sub xi, plus or minus j	$ \cos \psi_ { \xi , \mp j } $
Phi sub r s q sub r, arrow c.	$ \phi_ { rsq_ { r } } \rightarrow c $
c of t is greater than or equal to l sub 0	$ c ( t ) \geq l_0 $
widetilde beta sub nu sub j	$ \widetilde { \beta_ { \nu_j } } $
d, p sub 1 minus p sub 2	$ d | p_1 - p_2 $
P belongs to the set of M sub obs.	$ P \in \mathcal { M } _ { \text { obs } } $
E equals the set of 7.	$ E = [ 7 ] $
L equals one thousand mu.	$ L = 1000 \mu $
absolute value of g sub y prime	$ |g_ { y^\prime } | $
B sub delta of p is a subset of D sub k, t.	$ B_\delta ( p ) \subset D_ { k , t } $
q equals 8 point 2 plus or minus 1.5	$ q=8.2 \pm 1.5 $
q sub j belongs to Lambda star	$ q_j \in \Lambda^ * $
Eta of h, rho of r, goes to sigma of s.	$ \eta ( h ) \ : \rho ( r ) \to \sigma ( s ) $
T sub in equals 3.	$ T_ { \text { in } } = 3 $
G of the absolute value of the vector x sub m minus the vector x sub n.	$ G ( |\vec { x } _m-\vec { x } _n| ) $
eq	$ q_ { eq } =\frac { 1 } { \sqrt { 3a } } $
g sub t	$ g _t $
[truncated: 6,956 more rows]

## Sheet: Nikitos
( A, B, rho )	$ ( A , B , \rho ) $
( I ) implies ( X )	$ ( I ) \Rightarrow ( X ) $
(Alpha sub 1, ellipsis, alpha sub L minus 1)	$ ( \alpha_ { 1 } , \dots , \alpha_ { L-1 } ) $
(d plus 1) equals 4.	$ ( d+1 ) =4 $
0 is less than the absolute value of J which is less than the absolute value of I.	$ 0 < |J| < |I|. $
0.0167 raised to the power of asterisk.	$ 0.0167^ { \ast } $
0.1 times m times M.	$ 0.1~mM $
0.11 plus 0.05 minus 0.03	$ 0.11 \substack { +0.05 \\ -0.03 } $
0.13, 0.15	$ [ 0.13 , 0.15 ] $
0.154 with a lower uncertainty of 0.005 and an upper uncertainty of 0.004.	$ 0.154_ { -0.005 } ^ { +0.004 } $
0.4 is approximately less than or equal to beta which is approximately less than or equal to 0.62.	$ 0.4 \lesssim \beta \lesssim 0.62 $
0.71, subscript negative 0.39, superscript positive 0.91.	$ 0.71_ { -0.39 } ^ { +0.91 } $
0.776 plus or minus 0.011	$ 0.776\pm0.011 $
0.965 raised to the power of positive 0.046, sub 0.047.	$ 0.965^ { +0.046 } _ { -0.047 } $
1 divided by 90 equals 11.1	$ 1 \div 90=11.1 $
1.03 sub minus 0.16 superscript plus 0.16.	$ 1.03_ { -0.16 } ^ { +0.16 } $
1.1 raised to the power of 0.1, subscript 0.077.	$ 1.1^ { 0.1 } _ { 0.077 } $
1.91 raised to the power of positive 0.04 plus 0.01, and subscript negative 0.04 minus 0.01.	$ 1.91^ { +0.04+0.01 } _ { -0.04-0.01 } $
10 times the quantity M star divided by M sun is approximately 10.8.	$ _ { 10 } ( M_ * /M_\odot ) \sim10.8 $
10 to the power of negative ten times g to the power of negative one.	$ 10^ { -10 } g^ { -1 } $
12.8 plus or minus 1.2	$ 12.8\pm1.2 $
13.35 raised to the power of plus 0.15, sub minus 0.28.	$ 13.35^ { +0.15 } _ { -0.28 } $
133.8 raised to the power of plus 69.7, sub minus 47.6.	$ 133.8^ { +69.7 } _ { -47.6 } $
147.63 raised to the power of plus 0.23, sub minus 0.29.	$ 147.63^ { +0.23 } _ { -0.29 } $
168 plus or minus 13.	$ 168\pm13 $
19.070073	$ 19.070073 $
19.9 plus or minus 1.9.	$ 19.9 \pm 1.9 $
190.54 raised to the power of 9.57 sub 10.68.	$ 190.54^ { 9.57 } _ { 10.68 } $
2 times x sub 0 dot dot dot x sub n minus 1 plus dot dot dot	$ 2x_0\cdots x_ { n-1 } +\ldots $
2.161 plus or minus 0.012 meters per cubic centimeter.	$ 2.161\pm 0.012\ , \text { mV/cm } $
2.4 plus or minus 0.03.	$ 2.4\pm0.03 $
2.873, subscript negative 0.06, superscript positive 0.064.	$ { 2.873 } _ { -0.06 } ^ { +0.064 } $
205 Rn	$ ^ { 205 } Rn $
208.4 plus or minus 2.6.	$ 208.4\pm2.6 $
26.7 sub negative 0.1 superscript positive 0.1.	$ 26.7_ { -0.1 } ^ { +0.1 } $
3 equals 50.	$ _ { 3 } =50 $
3.42 plus or minus 0.27	$ 3.42\pm0.27 $
3.90 with a lower uncertainty of 1.27 and an upper uncertainty of 1.25.	$ 3.90_ { -1.27 } ^ { +1.25 } $
3.96 plus or minus 0.24.	$ 3.96 \pm 0.24 $
317.15 degrees	$ 317.15^ { \circ } $
32.56 plus or minus 0.007.	$ 32.56\pm0.07 $
352.5 plus or minus 0.48	$ 352.5\pm 0.48 $
38.92 plus or minus 0.44.	$ 38.92 \pm 0.44 $
4.3 F sub crit is less than or equal to F is less than or equal to 6.8 F sub crit.	$ 4.3 F_ { crit } \leq F \leq 6.8 F_ { crit } $
47.6 sub plus or minus 1.0	$ 47.6_ { \pm1.0 } $
5.28 raised to the power of positive 0.10, subscript negative 0.09.	$ 5.28^ { +0.10 } _ { -0.09 } $
5.5 plus or minus 6.90.	$ 5.5\pm 6.90 $
50.04 raised to the power of positive 0.06, subscript negative 0.04.	$ 50.04^ { +0.06 } _ { -0.04 } $
6.37 plus or minus 0.12.	$ 6.37\pm0.12 $
6.70 raised to the power of positive 0.86, with a lower value of negative 0.38.	$ 6.70^ { +0.86 } _ { -0.38 } $
7.0 raised to the power of positive one point zero zero, subscript negative four point zero.	$ 7.0^ { +12.0 } _ { -4.0 } $
7.5991 to the power of star star.	$ 7.5991^ { * * * } $
73 plus or minus 2.	$ 73\pm 2 $
9.22 plus or minus 0.04.	$ 9.22 { \pm } 0.04 $
9.80 raised to the power of plus 0.13, sub 0.09.	$ 9.80^ { +0.13 } _ { -0.09 } $
98.0, sub 60.0, superscript plus 58.0.	$ { 98.0 } _ { -60.0 } ^ { +58.0 } $
a bar sub theta.	$ \bar { a } _ { \theta } $
A belongs to M sub n of K.	$ A \in M_n ( K ) $
a belongs to T raised to the power of b sub i	$ a\in T^b_ { i } $
a belongs to the set containing 0, dot dot dot, r minus 1	$ a\in \ { 0 , \dots , r-1\ } $
a belongs to the set containing 1, 2, and 3.	$ a \in \ { 1 , 2 , 3\ } , $
A belongs to the set E	$ A \in \mathcal { E } $
A belongs to the set of G T sub k of X.	$ A\in\mathcal { GT } _k ( X ) $
A belongs to the set of imaginary part of K.	$ A\in \mathsf { Img } ( K ) $
a divided by a sub B	$ a / a_B $
A equals A of z.	$ A=A ( z ) $
A equals A to the power of mu sub mu	$ A = A^\mu_\mu $
A equals B equals 2.	$ A=B=2 $
a equals h sub 0 divided by L sub 0.	$ a = h_ { 0 } /L_ { 0 } $
A equals O star.	$ A=O^ * $
A equals the absolute value of s squared minus t divided by t.	$ A=|s^2-t|/t $
a equals zero point one eight eight seven open parenthesis eighty close parenthesis.	$ a=0.11887 ( 80 ) $
A gamma.	$ A_\gamma $
a greater than a sub c.	$ a > a_ { c } $
A hat minus one.	$ \hat A^ { -1 } $
A is greater than zero.	$ A > 0 $
a length is exactly.	$ and its length is exactly $
a less than t less than b.	$ \ , a < t < b , $
a matrix with parentheses.	$ is a matrix with ( $
a minus x goes to zero.	$ a-x\to 0 $
A of 5	$ A ( 5 ) $
A of b sub i equals zero.	$ A ( b_i ) : = 0 $
A of E, M, omega	$ A ( E ; M ; \omega ) $
A of i omega equals i omega plus mu minus Sigma of i omega.	$ A ( i\omega ) =i\omega+\mu-\Sigma ( i\omega ) $
A one of V.	$ A_1 ( V ) $
a plus s greater than or equal to a.	$ a+s\geq a $
A plus X	$ A + X $
A prime not equal to A.	$ A'\ne A $
A prime to chi bar chi	$ A ' \to \chi \overline { \chi } $
A right right arrow A prime	$ A \rightrightarrows A ' $
A squared is less than l squared.	$ A^2 < l^2 $
A squared of w	$ A^2 ( w ) $
A sub 0 equals 2 G Q squared divided by c to the power of 4.	$ A_0 = 2 G Q^2/c^4 $
A sub 0 goes to 0.	$ A_0\to 0 $
a sub 2, b sub 2 belongs to V of C sub 2	$ a_2 , b_2\in V ( C_2 ) $
a sub 2.	$ a_2 $
A sub 7 greater than 0.	$ A_ { 7 } > 0 $
A sub 7 times C sub 7 equals 0.	$ A_7C_7=0 $
A sub c bar sub S	$ A_ { \vec { c } } |_S $
A sub Delta superscript 1	$ A_ { \Delta } ^ { ( 1 ) } $
a sub four	$ a_ { 4 } $
a sub i equals zero point zero one.	$ a_i=0.01 $
a sub i superscript origin	$ a_i^ { origin } $
a sub j belongs to T sub a sub i.	$ { a_j } \in T_ { a_i } $
A sub Lambda raised to the power of t.	$ A_ { \Lambda^t } $
a sub mu sub p	$ a_ { \mu_p } $
a sub negative one equals a sub zero equals zero	$ a_ { -1 } =a_0=0 $
a sub q dagger.	$ a_q^\dagger $
A sub r prime q prime	$ \mathcal { A } _ { r ' q ' } $
A sub r r is similar to zero.	$ A_ { rr } \sim 0 $
a sub zero comma zero equals the integral from zero to one of f of t d t.	$ a_ { 0,0 } = \int_0^1 f ( t ) dt $
A sub zero equals A sub zero open parenthesis theta, alpha close parenthesis greater than one.	$ A_0=A_0 ( \theta , \alpha ) > 1 $
A tilde sub 1 equals open parenthesis A sub 0 minus A sub 1 close parenthesis divided by the square root of 2.	$ \widetilde { A } _1= ( A_0-A_1 ) /\sqrt { 2 } $
A tilde sub b zero.	$ \tilde A_ { b_0 } $
A to the power of Ising	$ A^ { \text { Ising } } $
a to the power of n plus k, b times a to the power of n times b.	$ a^ { n+k } ba^n b $
A zero, r	$ A ( 0 , r ) $
a, b greater than or equal to zero.	$ a , b\geq 0 $
Absolute value of A plus A is less than or equal to 3 times absolute value of A minus 4.	$ |A+A| \leq 3|A|-4 $
Absolute value of C sub zero comma one superscript H squared.	$ |\mathcal { C } _ { 0 , 1 } ^ { H } |^2 $
Absolute value of Delta F equals one.	$ |\Delta F| =1 $
Absolute value of delta tilde a is much less than absolute value of delta a is much less than one.	$ |\delta\tilde { a } |\ll |\delta a|\ll 1 $
absolute value of delta x prime.	$ |\delta x'| $
absolute value of E greater than N.	$ |E| > N $
absolute value of E minus E prime.	$ |E - E'| $
Absolute value of E sub j of I is less than 2 to the power of negative 16 times absolute value of I.	$ |E_j ( I ) | < 2^ { -16 } |I| $
absolute value of E sub ref.	$ |E_ { ref } | $
Absolute value of f sub s prime minus f sub s, less than or equal to 2.	$ \vert f_ { s ' } -f_s\vert \leq 2 $
Absolute value of g times S of M is less than or equal to lambda.	$ |gS ( M ) |\leq \lambda $
Absolute value of I sub k plus one is less than or equal to two times absolute value of I sub k.	$ |I_ { k+1 } | \leq 2|I_k| $
Absolute value of lambda equals the sum over i of q sub i.	$ |\lambda| = \sum_i q_i $
Absolute value of pi to the power of negative n equals absolute value of f less than or equal to 1.	$ |\pi|^ { -n } = \|f\| \leq 1 $
Absolute value of S is less than or equal to 35.	$ |S|\leq 35 $
Absolute value of tau tends to zero.	$ |\tau| \to 0 $
Absolute value of the vector p sub phi.	$ |\vec { p } _ { \phi } | $
Absolute value of theta, subscript infinity, is less than or equal to one-half.	$ |\theta|_ { \infty } \leq 1/2 $
Absolute value of V plus absolute value of E.	$ |V| + |E| $
absolute value of X sub 1 is greater than or equal to absolute value of X sub 2.	$ |X_1|\geq |X_2| $
absolute value of Y sub t plus one	$ |\mathcal { Y } _t|+1 $
absolute value of z.	$ \vert z \vert $
Ag dagger equals A sub g inverse.	$ A_g^\dagger = A_ { g^ { -1 } } $
Alpha approximately 0.878.	$ \alpha\approx 0.878 $
Alpha belongs to the open interval from 1 to 2.	$ \alpha \in ] 1,2 [ $
Alpha equals beta equals zero.	$ \alpha = \beta=0 $
Alpha equals D intersection F sub 0.	$ \alpha = D\cap F_0 $
Alpha equals rho sub 1.	$ \alpha = \rho_ { 1 } $
Alpha maps to f of x, alpha, q.	$ \alpha\mapsto f ( x , \alpha , q ) $
Alpha plus beta equals sigma sub 1.	$ \alpha + \beta = \sigma_1 $
Alpha sub i plus 1 alpha sub i.	$ \alpha_ { i+1 } \alpha_i $
Alpha sub k comma i superscript Phi open parenthesis rho close parenthesis.	$ \alpha_ { k , i } ^ { \Phi } ( \rho ) $
Alpha sub k equals the minimum of delta sub k and delta sub k squared.	$ \alpha_k = \min ( \Delta_k , \Delta_k^2 ) $
Alpha sub m star is greater than zero.	$ \alpha_ { m } ^ { * } > 0 $
Alpha sub max minus one.	$ \alpha_ { \max } - 1 $
Alpha sub n comma k equals k times open parenthesis n plus k minus 2 close parenthesis.	$ \alpha_ { n , k } : = k ( n+k-2 ) $
Alpha sub one comma two equals alpha plus or minus delta alpha divided by two.	$ \alpha_ { 1,2 } =\alpha\mp\delta\alpha/2 $
Alpha sub U equals alpha sub U prime sub eta prime.	$ \alpha_U=\alpha_ { U ' _ { \eta '' } } $
alpha sub x, alpha sub y	$ \alpha_x , \alpha_y $
Alpha sub y y.	$ \alpha_ { yy } $
Alpha sub zero belongs to A sub X to the power of D.	$ \alpha_0 \in A_X^D $
alpha times the derivative of a times t.	$ \alpha ( etat ' ) $
alpha.	$ ( \alpha ) $
and a given vertex.	$ and a given vertex $
angle bracket angle bracket	$ \langle\langle\rangle \rangle $
Angle bracket O, subscript S sub k.	$ \langle O \rangle_ { S_k } $
Angle bracket x, p sub 2, r sub b angle bracket.	$ \langle ? x , p_2 , r_b \rangle $
Angle bracket, gamma raised to vee, comma, beta, angle bracket, greater than or equal to 2.	$ \langle \gamma^\vee , \beta\rangle \geq2 $
Angle n prime is approximately equal to Omega	$ \langle n \rangle ' \sim \Omega $
approximately plus 2	$ \approx +2 $
arcsine of s to the power of negative two.	$ ^ { -2 } .s^ { -2 } $
Arcsine of zero equals zero.	$ \tanh ( 0 ) = 0 $
are in omega	$ r\in\Omega $
Area of F is less than or approximately equal to Area of z.	$ Area ( F ) \lesssim Area ( z ) $
At sub l to the power of h, for all h in H.	$ Att_l^h , \forall h\in H $
B belongs to M sub r, r minus s.	$ B\in M_ { r , r-s } $
B hat sub n.	$ \hat { B } _ { n } $
b implies (a implies b) equals 1.	$ b \to ( a \to b ) = 1 $
b is greater than or equal to n divided by log n.	$ b \geq n/ \log n $
b maps from R to the power of n to R to the power of m.	$ b : R^n\to R^ { m } $
b of x given y	$ b ( x|y ) $
B of x is equal to the quantity x divided by g of x, all raised to the power of 2.	$ B ( x ) : = ( x/g ( x ) ) ^2 $
B prime in X.	$ B ' \in X $
b prime is less than t is less than b	$ b^\prime < t < b $
B proportional to t	$ B \propto t $
b raised to the power of n comma k, subscript f	$ b^ { ( n , k ) } _f $
B raised to the power of n, raised to the power of negative K.	$ B^ { n , -K } $
b raised to the power of theta sub T	$ b^ { \theta } _ { T } $
B set minus A sub k	$ B\setminus A_k $
B slash r contains t, and X.	$ B/r\ni t\sqsubset X $
b squared minus omega one squared	$ b^2-\omega_1^2 $
B sub 1 intersection y is less than or equal to 0.	$ B_ { 1 } \cap\ { y\leqslant0\ } $
b sub 1 prime, b sub 2, dot dot dot, b sub k prime.	$ b_1 ' , b_2 , ... , b_k ' $
B sub 1 times B sub 1 to the power of negative 1 equals I.	$ B_1B_1^ { -1 } = I $
B sub 2 minus Phi sub 2 of X is not equal to 0.	$ B_ { 2 } -\Phi_ { 2 } ( X ) \neq0 $
B sub 4	$ \text { B } _4 $
b sub 4, b sub 1	$ b_4 , b_1 $
b sub i j prime	$ b_ { ij } ^\prime $
B sub j comma a is perpendicular to k sub k comma a.	$ B_ { j , a } \bot k_ { k , a } . $
B sub k comma q open parenthesis l close parenthesis	$ B_ { k , q } ( l ) $
b sub K sub P times b sub K sub Q star	$ b_ { K_P } * b_ { K_Q^ * } $
B sub r open parenthesis t sub 0 comma x sub 0 close parenthesis	$ B_r ( t_0 , x_0 ) $
B sub t is a subset of tilde B.	$ B_t \subset \widetilde { B } $
B superscript i subscript t	$ B^ { i } _ { t } $
B tilde sub j	$ \widetilde { B } _j $
B tilde.	$ \tilde { B } $
B times e raised to the power of k divided by M.	$ Be ( k/M ) $
B to K sub 1, open parenthesis, 1270, comma, 1400, close parenthesis, gamma.	$ B \to K_1 ( 1270,1400 ) \gamma $
b, B greater than zero	$ b , B > 0 $
bar mu not prece equal to bar mu.	$ \bar \mu \not \preceq \bar\mu $
bar p, bar q, belongs to C.	$ \bar p , \bar q\in C $
Bar Z sub k minus 1 to the power of n	$ \bar { \mathcal { Z } } _ { k-1 } ^ { n } $
Beta approximately equals four.	$ \beta\approx 4 $
Beta equals 2.86.	$ \beta=2.86 $
beta equals r over W	$ \beta=r/W $
Beta equals tau plus phi.	$ \beta=\tau+\phi $
Beta goes to beta sub c.	$ \beta\to \beta_c $
beta minus pi over 2	$ \beta-\pi/2 $
Beta of t equals 3 times the quantity t minus 0.4 squared.	$ \beta ( t ) = 3 ( t-0.4 ) ^2 $
Beta open parenthesis close parenthesis.	$ \beta ( ) $
beta star sub j equals zero	$ \beta^ * _j=0 $
Beta sub i is greater than or equal to c sub i times t to the power of lambda minus one minus epsilon.	$ \beta_i \geq c_i t^ { \lambda-1-\epsilon } $
Beta sub i plus h equals alpha plus i plus l sub k minus i plus h.	$ \beta_i+h= \alpha+i+l_ { k-i } +h $
Beta sub s equals zero.	$ \beta_s = 0 $
Beta sub zero approximately equals Q to the power of xz plus i times S to the power of y.	$ \beta_0 \approx Q^ { xz } +iS^y $
Beta to the power of mu equals u to the power of mu divided by T.	$ \beta^\mu = u^\mu/T $
Big O of alpha cubed	$ O ( \alpha^ { 3 } ) $
Big O of log d sub E	$ O ( \log d_E ) $
Big O of n times k.	$ O\left ( nk\right ) $
Big O of N to the power of 8	$ \mathcal { O } ( N^8 ) $
Big O of y to the power of 1.	$ \mathcal { O } ( y^1 ) $
Bo equals one.	$ \text { Bo } =1 $
brace, one thousand, two hundred, four thousand.	$ \ { 1000,2000,4000\ } $
C belongs to the set of CN.	$ C\in\mathsf { CN } $
c delta t over delta x	$ \frac { c \Delta t } { \Delta x } $
c equals 0.37 raised to the power of positive 0.02, subscript negative 0.03.	$ c=0.37^ { +0.02 } _ { -0.03 } $
c equals 1, dot dot dot, 30	$ c=1 , ... ,30. $
c equals C minus C bar.	$ c=C-\bar C $
c equals c of alpha, beta, q, r	$ c = c ( \alpha , \beta , q , r ) $
C equals C of q sub zero is greater than zero.	$ C=C ( q_0 ) > 0 $
C equals f inverse of x	$ C=f^ { -1 } ( \ { x\ } ) $
C equals the real part of the direct sum of the kernel of epsilon.	$ C = Re \oplus \ker\epsilon $
C equals the set containing c sub 1, ellipsis, c sub m minus 2k.	$ C = \ { c_1 , \ldots , c_ { m-2k } \ } $
c greater than 1	$ c \ ! > \ ! 1 $
c is less than or equal to n minus 1.	$ c \leq n-1 $
C of N.	$ C ( N ) $
C of r is approximately r to the power of d minus 2 plus eta.	$ C ( r ) \sim r^ { d - 2 + \eta } $
c of s, L, k	$ c ( s , L , k ) $
C psi	$ C \Psi $
C raised to the power of e sub sigma comma k.	$ C^ { \mathfrak { e } ( \sigma , k ) } $
c raised to the power of epsilon of t	$ c^\epsilon ( t ) $
c raised to the power of j p, comma, l k.	$ c^ { jp , lk } $
c raised to the power of k	$ c^ { k } $
c raised to the power of n, n factorial	$ c^ { n } n ! $
C raised to the power of n, X sub 5 comma r.	$ C^n ( X_ { 5 , r } ) $
c raised to the power of s, f, k plus 1.	$ c^ { s , f , k+1 } $
C raised to the power of T raised to the power of 5.	$ C ( T^5 ) $
C raised to the power of t.	$ C^ { t } $
C raised to the power of zero, sub t, H raised to the power of six, sub x.	$ C^0_t H^6_x $
C six equals C seven equals zero.	$ C_6 = C_7 = 0 $
c sub 0, C sub 1, C sub 2 greater than 0	$ c_0 , C_1 , C_2 > 0 $
C sub 1 equals C sub 1 of A, L, n, greater than 0.	$ C_1=C_1 ( A , L , n ) > 0 $
C sub 1 equals the interval from negative one to one.	$ C_1= [ -1,1 ] $
C sub 1 is less than or equal to C sub 3.	$ C_1\leq C_3 $
c sub 1, c sub 2 equals 24 chi.	$ c_1c_2 = 24\chi $
C sub 3	$ \text { C } _ { 3 } $
C sub 4, F	$ C_ { 4 , F } $
c sub A divided by a	$ \c_A / a $
C sub b to the power of a of z.	$ C_b^ { ( a ) } ( z ) $
c sub c p greater than zero	$ c_ { cp } > 0 $
c sub d, n	$ c_d , n , $
C sub Delta, J to the power of A sub 1 through A sub J.	$ C_ { \Delta , J } ^ { A_1\cdots A_J } $
c sub gamma a superscript 3	$ c_ { \gamma a } ^ { ( 3 ) } $
C sub H.	$ \mathcal { C } _H $
c sub i raised to the positive or negative power.	$ c_i^ { +/- } $
C sub i to the power of kappa kappa.	$ C_i^ { \hat { \kappa } \hat { \kappa } } $
C sub L is a subset of L.	$ C_L \subseteq L $
c sub m, n superscript star equals c sub n, m	$ c_ { m , n } ^ * = c_ { n , m } $
c sub max	$ c_ { \max } $
C sub mu minus	$ \mathcal { C } _\mu^- $
c sub one-half, c sub zero equals zero.	$ c_1=1/2\ , ,\ , c_0=0 $
c sub p times the quantity B sub n minus B sub n star.	$ c_p \cdot ( B_n-B_n^ * ) $
C sub Supp	$ \mathsf { C_ { supp } } $
c sub T K	$ c_ { T , K } $
C subset R to the power of n	$ C\subset \mathbb { R } ^ { n } $
c substar D	$ [ c ] _ * ( D ) $
C to the power of 2 gamma substar.	$ C^ { 2\gamma } _ * $
C, c.	$ C , c $
cal A sub n	$ { \cal\ A } _n $
Cal W sub phi.	$ { \cal W } _\varphi $
center dot	$ \sum_ { i\in s } \hat { e } _i^2/n $
Chi belongs to the set of integers from N.	$ \chi \in \operatorname { Irr } ( N ) $
Chi of F sub a equals negative five.	$ \chi ( F_a ) = -5 $
chi of M, N	$ \chi ( M , N ) $
Chi prime of H equals Delta of H equals Delta	$ \chi ' ( H ) =\Delta ( H ) =\Delta $
chi s.	$ BR ( B^0 \rightarrow \chi_s\gamma ) $
Chi squared equals ten point seven.	$ \chi^2=10.7 $
Chi sub B intersect P.	$ \chi_ { B\cap P } $
Chi sub negative one, restricted to G sub 2.	$ \chi_ { -1 } |_ { G_2 } $
close parenthesis t	$ y- ( \alpha-u ) t $
composition of dot	$ \operatorname { Com } ( \cdot ) $
cos squared of pi k over n	$ \cos^ { 2 } \frac { \pi k } { n } $
cos theta equals p raised to the power of z divided by p.	$ \cos\theta=p^z/p $
Curly brace F, overline F.	$ \ { F , \overline { F } \ } $
Curly brace t sub i comma t sub j equals zero.	$ \ { \t_i , \t_j\ } = 0 $
Curly brace, one, comma, dot dot dot, n minus one, curly brace.	$ \ { 1 , \dots , { n-1 } \ } $
Curly brace, one, comma, dot dot dot, ten.	$ \ { 1 , \dots,10\ } $
curly brace, pi sub i	$ \ { \pi_ { i } \ } $
Curly brace, x sub i, comma, w sub i, curly brace, sub i equals 1 to n.	$ \ { x_ { i } , w_ { i } \ } _ { i=1 } ^ { n } $
Curly braces, caret, tau, exclamation mark, alpha.	$ { } ^ { \tau\ ! } \alpha $
d approximately 21 degrees.	$ d \approx 21^\circ $
D belongs to N intersection P of A.	$ D \in N \cap \mathcal { P } ( \mathbb { A } ) $
d C of u, v over partial v	$ \frac { dC ( u , v ) } { \partial v } $
D equals 1.4	$ D=1.4 $
d equals 45 times mu	$ d=45 { { \mu } } $
D equals two L times open parenthesis four L minus one close parenthesis.	$ D=2L ( 4L-1 ) $
D equals xi squared minus 4 epsilon squared.	$ D=\xi^2-4\varepsilon^2 $
D goes to zero	$ D \rightarrow 0 ; $
d of t is not equal to zero	$ d ( t ) \neq 0 $
d of v equals one	$ d ( v ) = 1 $
d of x, y is less than r plus epsilon	$ d ( x , y ) < r+\epsilon $
d of Z to the power of G, Z, tends to zero	$ d ( Z^G , Z ) \to 0 $
D P E open parenthesis T sub 16 comma T sub 6 close parenthesis	$ DLP ( T_ { 16 } , T_ { 6 } ) $
D plus n	$ ( D+n ) $
D raised to the power of 1 is a subset of D raised to the power of 2.	$ D^1\subseteq D^2 $
D raised to the power of i.	$ \mathcal { D } ^i $
D raised to the power of star zero, D raised to the power of plus gamma.	$ D^ { * 0 } D^+ \gamma $
D raised to the power of star, D bar sub 1.	$ D^ { ( * ) } \bar { D } _1 $
d rho over d t equals L rho	$ d\rho/dt = \mathcal { L } \rho $
D S sub v right arrow p	$ DS_ { v \rightarrow p } $
D sub 2n plus 1	$ A_n , D_ { 2n+1 } $
D sub 8	$ \mathbb { D } _8 $
d sub A equals n sub s divided by 2.	$ d_A=n_s/2 $
d sub G W 1.	$ d_ { GW_1 } $
D sub i1 equals zero.	$ D_ { i1 } = 0 $
D sub K.	$ \mathscr { D } _ { K } $
D sub m equals N.	$ D_m = N $
D sub q, raised to the power of i.	$ D_q^ { ( i ) } $
D sub s, open parenthesis, 2 to the power of 1, P sub 1, close parenthesis.	$ D_s ( 2^1P_1 ) $
D sub v	$ D_ { fov } $
d sub w to the power of N equals d sub task to the power of N.	$ d_w^N = d_ { \text { task } } ^N $
D sub z.	$ \mathcal { D } _ { z } $
D subscript 1 equals E open parenthesis 45 D close parenthesis	$ D_ { 1 } = E ( 45D ) $
d times m	$ d\cdot m $
d varpi equals ell	$ d\varpi=\ell $
dee absolute value of X	$ d|X| $
dee belongs to upsilon of en	$ d\in \Upsilon ( n ) $
dee much less than xi.	$ d\ll\xi $
dee pee eff equals three delta over seven equals three point three.	$ dpf=3\delta/7=3.3 $
dee sub L equals 5.	$ d_L=5 $
dee sub M equals infinity	$ d_M=\infty $
dee sub p plus one	$ d_ { p+1 } $
dee sub x squared minus y squared, pee	$ d_ { x^2-y^2 } , p $
dee tilde eta	$ d\tilde \eta $
Deg of d sub 0 equals 3	$ deg ( d_0 ) = 3 $
degree equals 36.	$ \deg=36 $
Degree of negative v equals zero.	$ \deg^- ( v ) =0 $
Delta a equals 2 pi f sub a.	$ \Delta a = 2 \pi f_a $
delta bar sub j squared of tau	$ \overline { \delta_j^2 ( \tau ) } $
Delta colon M F to N F	$ \delta : MF\to NF $
Delta d is a subset of the set of real numbers to the power of d plus one.	$ \Delta^d \subset \mathbb { R } ^ { d+1 } $
Delta double prime sub pi comma sigma.	$ \Delta_ { \pi , \sigma } '' $
Delta epsilon equals zero point zero zero five.	$ \Delta \varepsilon = 0.005 $
Delta equals cosine k.	$ \Delta=\cos k $
delta Gamma sub 1 2.	$ \delta \Gamma_ { 12 } $
delta greater than zero point zero four.	$ \delta > 0.04 $
Delta m, Delta n, equals, plus or minus two, zero.	$ ( \Delta m , \Delta n ) = ( \pm2,0 ) $
Delta Mean Pee	$ \Delta \text { MeanAP } $
delta of i, j equals one.	$ \delta ( i , j ) =1 $
delta one is greater than zero.	$ \delta_ { 1 } > 0 $
delta phi.	$ \delta\varphi $
Delta prime, subscript tilde C, slash C.	$ \Delta ' _ { \tilde { C } /C } $
delta Sigma over delta phi.	$ \delta\Sigma/\delta\varphi $
Delta star sub max of D.	$ \delta^ * _ { \max } ( D ) $
Delta sub 1 belongs to the set of 0, 1.	$ \delta_1\in\ { 0,1\ } $
Delta sub k sub 1, ellipsis, k sub l equals gamma.	$ \delta_ { k_1 , \ldots , k_l } = \gamma $
delta sub n comma n prime.	$ \delta_ { n , n ' } $
Delta sub N sub f equals 2 times N sub f plus 2.	$ [ \Delta_ { N_f } ] =2 ( N_f+2 ) $
Delta sub one, two equals Delta sub one, two open parenthesis x, comma t, close parenthesis.	$ \Delta_ { 1,2 } =\Delta_ { 1,2 } ( x , t ) $
delta sub x sub x equals one.	$ \delta_ { xx } =1 $
delta superscript s subscript f equals zero.	$ \delta^ { ( s ) } _f = 0 $
delta t equals zero point zero one.	$ \delta t=0.01 $
Delta theta sub d.	$ \Delta \theta_d $
delta to the nabla power.	$ \delta^ { \nabla } $
Delta to the power of n equals n minus the quantity N minus 1 divided by 2.	$ \delta^ { ( n ) } = n-\frac { N-1 } { 2 } $
delta u is greater than delta u squared.	$ \delta_u > \delta_u^2 $
Delta W sub t equals W sub t minus open parenthesis 1 minus lambda close parenthesis W sub t minus 1.	$ \delta W_t = W_t - ( 1 - \lambda ) W_ { t-1 } $
delta W.	$ \delta W $
Delta x equals pi divided by two to the power of fifteen.	$ \Delta x=\pi/2^ { 15 } $
Delta z equals zero point zero one.	$ \Delta z=0.01 $
Delta z sub L	$ \Delta z_L $
divided by theta cubed.	$ /\theta^ { 3 } $
Dominated atmospheres: logarithm of H.	$ dominated atmospheres : log ( H $
dot rho sub 12	$ \dot { \rho } _ { 12 } $
dot tau sub x goes to zero.	$ \dot \tau_x\rightarrow 0 $
dot x to the power of i zero	$ \dot x^i ( 0 ) $
double dot X sub H H	$ \ddot { X } _ { HH } $
e	$ e^ { s^2/2 } $
e ( i ) less than e ( j )	$ e ( i ) < e ( j ) $
E equals E of x.	$ E=E ( x ) $
E equals f of L, subset of M	$ E = f ( L ) \subseteq M $
E equals R set minus S.	$ E=R \setminus S $
e equals the set of all pairs (u, v) such that u and v are elements of S sub h of v.	$ e = \ { u , v\ } \in S_h ( v ) $
E evaluated at k	$ E ( k ) $
E goes to S raised to the power of 1.	$ E\to S^1 $
e is approximately equal to 360 plus or minus 180.	$ e\sim360\pm180 $
E is equivalent to E bar.	$ E\leftrightarrow\bar { E } $
E L of G	$ \mathsf { EL } ( G ) $
e minus is not equal to e plus.	$ e_-\neq e_+ $
e N arrow e prime X	$ eN \rightarrow e ' X $
E of F sub i	$ E ( F_i ) $
E of r sub x, r sub y.	$ E ( r_x , r_y ) $
E of S z.	$ E ( S^z ) $
e raised to the power of 2 alpha phi	$ e^ { 2\alpha\varphi } $
E raised to the power of B to the t	$ \mathbb { E } ^ { \mathcal { B } ^t } $
e raised to the power of i pi kappa sub O	$ e^ { i\pi\kappa_\mathcal { O } } $
e raised to the power of i t xi sub B	$ e^ { i t \xi_B } $
e sub 1 equals v.	$ e_1 = v $
e sub 1 star plus c sub 2 e sub 2 star plus c sub 3 e sub 3 star	$ e_1^ * +c_2e_2^ * +c_3e_3^ * $
e sub 1 times m sub 2 to the power of p.	$ e_1m_2^ { p } $
E sub 2, i	$ E_ { 2 , i } $
E sub 8 times D sub 8.	$ E_8D_8 $
E sub 9	$ \mathcal { E } '_9 $
E sub b minus v.	$ E_ { b-v } $
e sub ell sub zero	$ e_ { \ell_0 } $
E sub g not equal to zero.	$ E_g\neq0 $
E sub g prime, A script F, superscript 3.	$ E_ { g ' , A\mathcal { F } } ^ { ( 3 ) } $
E sub h is approximately equal to E sub l plus.	$ ~E_h \simeq E_ { \ell^+ } $
E sub i perpendicular equals I minus E sub i.	$ E_i^ { \perp } =I-E_i $
e sub mu mu to the power of d over 2 minus 1, natural logarithm of mu over T.	$ e_\mu \mu^ { d/2-1 } \ln ( \mu/T ) $
e sub n plus 1 equals 0.	$ e_ { n+1 } =0 $
E sub S, y	$ E_ { S , y } $
e subscript 1 equals open parenthesis 1 comma 0 close parenthesis.	$ e_1 : = ( 1 , 0 ) $
E subscript N.	$ E_N $
e times the quantity of n sub p minus n sub e times r	$ e ( n_p-n_e ) r $
e to the power of i A T	$ e^ { iAT } $
e to the power of negative D sub R t is approximately equal to one minus D sub R t.	$ e^ { -D_R t } \simeq 1-D_R t $
e to the power of negative e to the power of positive goes to muon neutrino, anti-muon neutrino, and higgs.	$ e^-e^+\to \nu_\mu\bar { \nu } _\mu h $
e union c sub 4 union D	$ e\cup \ { c_4\ } \cup D $
E, evaluated at M degrees.	$ E|_ { M^\circ } $
eff equals eff sub one Eff sub two.	$ F=F_ { 1 } F_ { 2 } $
eff of I raised to the power of p, comma a.	$ f ( I^ { p } , a ) $
eff raised to the power of T.	$ f^ { T } $
eff sub i, K	$ f_ { i , K } $
eight one s.	$ 81.1s $
Eight point five nine times ten to the power of negative eight.	$ 8.59\cdot 10^ { -8 } $
Eight times alpha sub z squared.	$ 8\alpha_ { z } ^ { 2 } $
ell goes to infinity	$ \ell\rightarrow\infty $
ell of ell, b	$ \ell ( l , b ) $
ell of vector v	$ l ( \vec { v } ) $
ell plus five	$ \ell+5 $
ell to the power of one, ess sub k.	$ l^ { 1 , s } _k $
ell zero zero ell	$ \ell00\ell $
ell: H to P greater than zero	$ \ell : H \to P_ { > 0 } $
em colon vee open parenthesis gee close parenthesis hookrightarrow X	$ m : V ( g ) \hookrightarrow X $
em of theta minus theta	$ m ( \theta ) -\theta $
Epsilon belongs to the interval from zero to K star.	$ \epsilon\in [ 0 , K^ * ) $
Epsilon equals s equals zero.	$ \epsilon=s=0 $
epsilon equals zero point one six five.	$ \epsilon=0.165 $
Epsilon equals zero point two nine.	$ \epsilon=0.29 $
Epsilon greater than one divided by the square root of T.	$ \epsilon > { 1 } / { \sqrt { T } } $
epsilon less than 32.	$ \epsilon < 32 $
epsilon minus alpha minus beta	$ \epsilon- \alpha-\beta $
Epsilon of phi equals one.	$ \epsilon \left ( \phi \right ) =1 $
Epsilon sub 1, norm of v sub i, norm sub 2, c sub j, norm sub 2.	$ \varepsilon_1\|v_i\|_2\|c_j\|_2 $
epsilon sub h N A similar to	$ \varepsilon_ { hBN } \sim $
epsilon sub j equals zero.	$ \varepsilon_j=0 $
Epsilon sub k, epsilon prime sub k equals zero.	$ \epsilon_k , \epsilon'_k=0 $
Epsilon sub n equals 2 times e to the power of negative n to the power of one-fourth.	$ \epsilon_n=2e^ { -n^ { \frac { 1 } { 4 } } } $
Ess-Oh three minus	$ SO ( 3 ) - $
eta equals 1.464.	$ \eta = 1.464 , $
Eta equals epsilon to the power of negative one times mu.	$ \eta=\varepsilon^ { -1 } \mu $
Eta equals the sum over j of b sub j times f sub j.	$ \eta = \sum_j b_j f_j $
Eta greater than zero, T equals zero.	$ \eta > 0 , T = 0 $
Eta of k equals open parenthesis, C times B to the power of negative l, close parenthesis, to the power of k.	$ \eta ( k ) = ( C B^ { -l } ) ^k $
Eta of one-half equals p.	$ \eta ( 1/2 ) =p $
eta sub c1 goes to eta sub c eta prime.	$ \eta_ { c1 } \to \eta_c\eta ' $
Eta sub dch.	$ \eta_ { \text { dch } } $
eta sub m greater than or equal to zero.	$ \eta_ { m } \geq 0 $
Eta sub N superscript 1, ellipsis, eta sub N superscript k.	$ ( \eta_N^1 , \ldots , \eta_N^k ) $
Eta sub plus minus, zero.	$ \eta_ { \pm,0 } $
eta sub r sub zero	$ \eta_ { r_0 } $
eta sub r u	$ \eta_ { ru } $
Eta sub s to the power of n, open parenthesis, hat x sub star, comma, negative one, close parenthesis.	$ \eta_s^n ( \hat { x } _ { \star } , -1 ) $
Eta sub-tilde-k belongs to the open interval from s to e.	$ \eta_ { \widetilde { k } } \in ( s , e ] $
ex belongs to U of P	$ x\in U ( P ) $
eye of vector x	$ I ( \vec x ) $
eye-bar beta to the power of mu	$ i\hbar\beta^\mu $
f : the function f [0, 1] raised to the power of N, maps to the set of real numbers.	$ f : [ 0,1 ] ^ { N } \rightarrow\mathbb { R } $
f belongs to the set of A of Omega	$ f \in { \cal A } ( \Omega ) $
f belongs to the set of A R	$ f\in \cal { AR } $
F delta of x equals F tau of x semicolon q.	$ F_\Delta ( x ) =F_ { \tau } ( x ; q ) $
F equals d V	$ \mathcal { F } =d\mathcal { V } $
F equals G intersection H.	$ F = G \cap H $
f equals phi 2 divided by phi 1.	$ f = \phi_2/\phi_1 $
f equals x to the power of 4 plus b, belonging to K, square brackets x.	$ f=x^4+b\in K [ x ] $
f inverse of v, maps to E sub v.	$ f^ { -1 } ( v ) \to E_v $
f maps from B to C	$ f : B \mapsto C $
f maps from E to Y	$ f : E \rightarrow Y $
f maps X to D	$ f : X \to D $
f maps x to p	$ f : x \mapsto p $
f minus g	$ f-g $
F of 12, 32 equals 3.411.	$ F ( 12,32 ) =3.411 $
f of d, c sub j equals b	$ f ( d , c_j ) = b $
f of log tau	$ f ( \log \tau ) $
f of m given a, c	$ f ( m|a , c ) $
f of m sub 1, m sub 2	$ f\left ( m_ { 1 } , m_ { 2 } \right ) $
f of n goes to infinity	$ f ( n ) \rightarrow \infty $
F of O is a subset of O.	$ F ( \mathcal { O } ) \subset \mathcal { O } $
f of the kernel of delta is a subset of the kernel of mu.	$ f ( \ker \delta ) \subseteq \ker \mu $
f of w, s equals L of w minus L sub s of w.	$ f ( w , s ) = L ( w ) - L_s ( w ) $
f of x minus f hat plus g sub Q of x	$ f ( x ) - \hat { f } + g_Q ( x ) $
F of z star.	$ F ( z^\star ) $
f raised to the gamma subscript Ra open parenthesis r close parenthesis	$ f^ { \gamma } _ { Ra } ( r ) $
f star sub i.	$ f^ * _i $
F star.	$ \mathcal { F } ^ { * } $
f sub 0 belongs to L to the power of 1 sub m sub alpha of G.	$ f_0 \in L^1_ { m_\alpha } ( G ) $
f sub 0 equals s bar times s.	$ f_0=s\bar { s } $
f sub 1 of dot dot dot f sub 4 of dot	$ f_1 ( \cdot ) , \ldots , f_4 ( \cdot ) $
f sub A, union sub i, X sub i, arrow, Z double-struck	$ f_A : \bigcup_i X_i\to \mathbb { Z } $
f sub absolute value of h sub 2 absolute value squared of X	$ f_ { \mid h_ { 2 } \mid ^ { 2 } } ( X ) $
F sub alpha, m	$ F_ { \alpha , m } $
F sub c, open square bracket p, close square bracket, open parenthesis t plus tau, close parenthesis.	$ F_ { c } [ p ] ( t+\tau ) $
F sub D equals 0.2.	$ F_ { D } = 0.2 $
f sub D star	$ f_ { D^ * } $
f sub i, i in Q sub 0.	$ ( f_i ) _ { i\in Q_0 } $
f sub j raised to the power of sigma equals f sub 1 plus	$ f_j^\sigma=f_1^+ $
F sub K superscript j.	$ F_K^j $
F sub K.	$ F_ { \mathsf { K } } $
f sub l goes to chi f sub l	$ f_l \rightarrow \chi f_l $
f sub n prime of dot	$ f_n^ { \prime } ( \cdot ) $
f sub Omega sub K of chi equals chi	$ f_ { \Omega_K } ( \chi ) = \chi $
f sub one of dot given s sub i	$ f_1 ( \cdot|s_i ) $
f sub P of n equals p	$ f_P ( n ) = p $
F sub t sub n	$ \mathcal { F } _ { t_n } $
f to the power of n of x belongs to B	$ f^n ( x ) \in B $
f to the power of negative m, open parenthesis p, close parenthesis, belongs to W sub n, comma i.	$ f^ { -m } ( p ) \in W_ { n , i } . $
f to the power of nu, sub kappa, open parenthesis omega, comma p, close parenthesis.	$ f^\nu_\kappa ( \omega , p ) $
f, Y to the power of n plus 1, right arrow, X to the power of n.	$ f : Y^ { n+1 } \longrightarrow X^n $
fifty point one three	$ 510.3 $
fifty-five hundred eighty.	$ 5580 $
Fifty-five point six four	$ 55.64 $
fifty-seven point eight.	$ 57.8 $
Five hundred and forty.	$ 540 $
Five keV sub n r.	$ 5\ , \text { keV } _\text { nr } $
five minus i	$ 5-i $
Five thousand nine hundred three with a lower limit of sixty-six and an upper limit of fifty-three.	$ 5903_ { -66 } ^ { +53 } $
Five thousand three hundred two plus or minus one hundred thirty-five.	$ 5302\pm135 $
floor of epsilon n	$ \lfloor\varepsilon n\rfloor $
For all P prime in the set P.	$ \forall P ' \in \mathcal { P } $
forty-four thousand eight hundred thirty-nine.	$ 44839 $
forty-one.	$ 4091\ , $
Four h plus one.	$ 4h+1 $
four hundred forty-two plus or minus five.	$ 442 \pm 5 $
four k plus three	$ ( 4k+3 ) $
Four point four seven plus or minus zero point zero four.	$ 4.47\pm 0.04 $
Fraction one over C, open parenthesis, log base two of M minus one, plus C sub two, close parenthesis.	$ \frac { 1 } { C } ( \log_2 ( M-1 ) +C_2 ) $
Fraction one over M equals n to the power of negative r plus little o of one.	$ \frac { 1 } { M } = n^ { - r + o ( 1 ) } $
Fraction one over sigma sub omega.	$ \frac { 1 } { \sigma_ { \omega } } $
Fraction T over 2 times J nabla sub R sub lambda.	$ \frac { T } { 2 } J \nabla_ { R_\lambda } $
fraction three J sub 2 plus six divided by three J sub 2 plus one.	$ \frac { 3J_2+6 } { 3J_2 + 1 } $
fraction three over two, times the quantity a squared minus one.	$ \dfrac { 3 } { 2 } ( a^2-1 ) $
Fraction, partial derivative of chi with respect to alpha.	$ \frac { \partial \chi } { \partial \alpha } $
Fraction, partial phi, partial U.	$ \frac { \partial \phi } { \partial U } $
fraktur u of r	$ \mathfrak { pu } ( r ) $
g belongs to G	$ g_i , g_j , g\in G $
g belongs to Gamma, v belongs to E.	$ g \in \Gamma , v \in E $
g belongs to the set S	$ g\in \mathscr { S } $
g belongs to U sub G.	$ g \in U_G $
G delta of x.	$ G_\Delta ( x ) $
g equals mu.	$ g = \mu $
G equals open parenthesis U union V comma E close parenthesis.	$ G= ( U\cup V , E ) $
G equals the union of I and J, E.	$ G= ( I\cup J , E ) $
G F equals 1.	$ WG = 1 $
G intersection i equals empty set.	$ G\cap i=\emptyset $
G left-pipe G double-struck	$ G\lhd \mathbb { G } $
g of a times b, a times b, is less than or equal to a times b.	$ g ( a \cdot b , a \cdot b ) \leq a \cdot b $
g of b, c equals d	$ g ( b , c ) = d $
G of g sub pi, Delta	$ \mathcal { G } ( g_ { \pi } , \Delta ) $
g of nu	$ g ( \hat\nu ) $
g of r equals the sum over k of chi sub k times g sub k of r.	$ g ( r ) = \sum_k \chi_k g_k ( r ) $
g of t is greater than one.	$ g ( t ) > 1 $
g of the cosine of gamma and the dot of gamma is less than or equal to zero.	$ g ( \dot\gamma , \dot\gamma ) \leq 0 $
g of w is a proper subset of g of v.	$ g ( w ) \sqsubset g ( v ) $
g of x to the power of k, comma, y to the power of k.	$ g ( x^k , y^k ) $
g omega	$ g \omega $
g prime is approximately 0.6 minus 0.7.	$ g^\prime\sim 0.6-0.7 $
G prime.	$ { G^ { \prime } } $
g R squared minus delta equals 1.713	$ g R^ { 2-\Delta } =1.713 $
g raised to the power of z sub t, greater than or equal to	$ \tilde g^z_ { t , \geq } $
G star equals G divided by epsilon.	$ G^ { * } = \frac { G } { \epsilon } $
G sub 1 or G sub 2	$ G_1 \vee G_2 $
g sub 1, g sub 2, g sub 3 belongs to G.	$ g_1 , g_2 , g_3\in G $
g sub 2 of z equals 2 times exponential of z squared minus 1.	$ g_2 ( z ) = 2 \exp ( z^2 ) - 1 $
g sub 3 greater than g sub 4 greater than g sub 1 greater than g sub 2 greater than g sub 5	$ g_3 > g_4 > g_1 > g_2 > g_5 $
G sub 3, open parenthesis, s equals 0, close parenthesis, equals 2 m over gamma.	$ G_3 ( s=0 ) =2m/\gamma $
g sub b of a	$ g_b ( a ) $
g sub d approximately 0.5	$ g_d \approx 0.5 $
g sub i belongs to the boundary of d prime	$ g_i\in \partial d ' $
G sub i equals the commutator of G and G sub i.	$ G_i= [ G , G_i ] $
G sub i minus 1 divided by G sub i.	$ G_ { i-1 } /G_i $
g sub i, B to the power of M, to B, i equals 1 to N.	$ g_i : B^M \to B , i=1 , \ldots , N $
G sub K greater than G sub L.	$ G_K > G_L $
G sub n superscript X of o	$ G_n^ { ( X ) } ( o ) $
G sub n, g sub n.	$ \mathbb { G } _ { n , g_ { n } } $
G sub phi sub i phi sub j, phi sub n phi sub m	$ G_ { \phi_i\phi_j , \phi_n\phi_m } $
g sub S equals g sub S sub 0 plus g sub S sub 1	$ g_S = g_ { S_0 } + g_ { S_1 } $
G sub u.	$ \mathcal { G } _u $
g sub W W sub R superscript open parenthesis 1 close parenthesis h	$ g_ { WW_R^ { ( 1 ) } h } $
G superscript plus open parenthesis t subscript i comma t subscript j close parenthesis	$ G^ { ++ } ( t_i , t_j ) $
G tilde sub n superscript w.	$ \tilde { G } _ { n } ^w $
g times eta i belongs to C infinity c.	$ g * \eta_i\in C^ { \infty } _c $
G times K sub k.	$ G\cdot K_k $
g to the power of q sub A times g to the power of q sub V.	$ g^q_A\cdot g^q_V $
G x complement set minus G x.	$ \overline { Gx } \setminus Gx $
gamma bar equals C sub n.	$ \bar { \Gamma } =C_n $
gamma bar k plus one	$ \gamma\vert ( k+1 ) $
Gamma belongs to the open interval from 0 to 4.	$ \gamma \in ( 0,4 ) $
Gamma dot I.	$ \gamma.I $
Gamma equals Gamma to the power of Pi.	$ \Gamma=\Gamma^ { \Pi } $
Gamma equals one point four six.	$ \Gamma =1.46 $
Gamma equals open parenthesis, lambda sub z, close parenthesis, sub z in Z, comma, y.	$ \gamma= ( ( \lambda_z ) _ { z\in Z } , y ) $
Gamma equals pi sub 1 open parenthesis M close parenthesis times pi sub 1 open parenthesis M prime close parenthesis.	$ \Gamma = \pi_1 ( M ) * \pi_1 ( M ' ) $
Gamma equals the change in temperature divided by m raised to the power of j.	$ \gamma = \frac { \Delta T } { m^j } $
Gamma is distributed uniformly between 0.8 and 1.	$ \gamma\sim U ( 0.8,1 ) $
Gamma is greater than 0.4.	$ \Gamma > 0.4 $
gamma L sub 3 d	$ \gamma L_3 d $
gamma minus union gamma plus.	$ \gamma^-\cup\gamma^+ $
Gamma of a, gamma of b, belongs to V.	$ \gamma ( a ) , \gamma ( b ) \in V $
Gamma of empty set equals zero.	$ \gamma\left ( \emptyset \right ) =0 $
Gamma of t, i, j.	$ \Gamma ( t , i , j ) $
Gamma open parenthesis W to the power of negative goes to ell minus bar nu sub ell close parenthesis.	$ \Gamma ( W^-\to \ell^-\bar { \nu } _\ell ) $
Gamma prime of s sub 1 is greater than 0.	$ \gamma^ { \prime } ( s_ { 1 } ) > 0 $
Gamma psi composed with pi equals pi.	$ \Gamma_\psi\circ\pi = \pi $
Gamma sub 1 equals lambda sub A open parenthesis Gamma comma p sub 1 close parenthesis.	$ \Gamma_1 = \lambda_ { A } ( \Gamma , p_1 ) $
gamma sub 2 of l	$ \gamma_2 ( l ) $
Gamma sub crit equals zero point eight eight one nine.	$ \Gamma_ { crit } =0.8819 $
Gamma sub init equals one.	$ \gamma_ { init } = 1 $
Gamma sub M equals plus or minus one, open parenthesis, rho, close parenthesis.	$ \gamma_ { M=\pm1 } ( \rho ) $
Gamma sub m to the power of r over b.	$ \Gamma_m^ { r/b } $
gamma sub n.	$ { \gamma } _ { n } $
Gamma sub one comma two equals two pi rho t sub one comma two squared.	$ \Gamma_ { 1,2 } =2\pi\rho t_ { 1,2 } ^2 $
gamma sub p much less than one.	$ \gamma_p\ll 1 $
gamma sub y of s equals y	$ \gamma_y ( s ) =y $
Gamma sub zero, open parenthesis, twelve, close parenthesis, sub plus.	$ \Gamma_ { 0 } ( 12 ) _ { + } $
gamma subset E	$ \gamma\subset E $
Gamma superscript open square bracket o close square bracket subscript n n.	$ \Gamma^ { [ o ] } _ { nn } $
gamma, r	$ ( \gamma , r ) $
Geo equals 329.	$ Geo=329 $
greater than 16.7	$ > 16.7 $
greater than or equal to ten to the power of negative five.	$ \geq 10^ { -5 } ) $
greater than pi divided by 4.	$ > \pi/4 $
greater than zero point six nine.	$ > 0.69 $
H bar equals H divided by 2 c sub 2.	$ \bar { H } =\frac { H } { 2c_2 } $
h belongs to H of A	$ h\in H ( A ) $
H equals 2, D equals 8.	$ H=2 , D=8 $
h equals one, two, dot dot dot, H	$ h = 1 , 2 , \dots , H $
H equals the angle bracket, H hat, angle bracket.	$ H=\langle\hat { H } \rangle $
h equals tilde t sub k, tilde t sub pi equals 1.	$ h = \tilde { t } _k , \tilde { t } _\pi = 1,0 $
H is not equal to K sub 2.	$ H\ne K_2 $
h maps from the tuple T, B sub T plus M sub T to the tuple Y, B sub Y plus M sub Y.	$ h \colon ( T , B_T+M_T ) \to ( Y , B_Y+M_Y ) $
H of X union CL.	$ H ( X \cup CL ) $
H of z, bar z	$ H ( z , \bar { z } ) $
H one of H comma A equals zero	$ H^1 ( H , A ) =0 $
H one of O sub S equals zero.	$ H^1 ( \mathcal { O } _S ) =0 $
H plus e.	$ H+e $
H plus H k Z Z superscript plus equals k Z Z superscript plus.	$ H^+H k ( Z , Z ) ^+ = k ( Z , Z ) ^+ $
H prime 1, dot dot dot, H prime sub d.	$ H'_1 , \dots , H'_d $
h raised to the mu nu power, open parenthesis x comma p, close parenthesis.	$ h^ { \mu\nu } ( x , p ) $
H raised to the power of L of t.	$ H^L ( t ) $
H raised to the power of l.	$ H^l $
h raised to the power of zero, evaluated at p.	$ h^ { ( 0 ) } ( p ) $
H squared of G, A	$ H^2 ( G , A ) $
H sub 12 of k.	$ H_ { 12 } ( \vec { k } ) $
h sub 2 plus u h sub 1	$ h_2+uh_1 $
h sub a.	$ h_ { a } $
H sub alpha, beta.	$ H_ { \alpha , \beta } $
H sub C	$ \mathcal { H } _\mathcal { C } $
h sub d minus lambda is greater than zero	$ h_ { d-\lambda } > 0 $
h sub F, p equals h sub L, p equals 1	$ h_ { F , p } =h_ { L , p } =1 $
H sub i superscript star	$ H_ { i } ^ { * } $
h sub j of L equals h sub j of x sub N, equivalent to H sub j.	$ h_j ( L ) = h_j ( x_N ) \equiv H_ { j } $
h sub k J sub i	$ ( h_kJ_i ) $
h sub k, alpha, beta.	$ h_ { k , \alpha , \beta } $
h sub sigma of i equals plus or minus 1.	$ h_ { \sigma ( i ) } = \pm 1 $
h sub star equals two-thirds square root of three.	$ h_ * =2/3\sqrt { 3 } $
h sub t circle phi sub R to the power of negative eta t	$ h_t \circ \phi_ { R } ^ { -\eta t } $
H sub W raised to the power of delta S equals 2.	$ H_W^ { \Delta S=2 } $
h sub zero comma x plus h sub one comma x equals zero.	$ h_ { 0 , x } + h_ { 1 , x } =0 $
H sub zero equals seventy-three point one plus or minus one point zero.	$ H_ { 0 } =73.1\pm1.0 $
h times c times Y plus X goes to T times the quantity Z plus the quantity Y plus X plus the quantity Y plus X.	$ h\c Y+X\to T ( ( Z+ ( Y+X ) ) + ( Y+X ) ) $
H to the power of 1 of K equals 0	$ H^1 ( K ) =0 $
h-bar omega sub i plus i zero plus.	$ \hbar\omega_i+i0^+ $
H-bar sub zero.	$ \hbar_0 $
H, Q, 0 equals U bar	$ ( H , Q,0 ) =\overline { U } $
Hat alpha sub z phi sub I is approximately equal to u to the power of 4.	$ \hat { \alpha } _ { z\phi_I } \sim u^4 $
hat B sub i superscript s	$ \hat { \mathcal { B } _i^ { s } } $
Hat H equals open parenthesis hat V comma hat E close parenthesis.	$ \hat { H } = ( \hat { V } , \hat { E } ) $
Hat S sub i sup z hat S sub i plus one sup z	$ \hat { S } _ { i } ^z \hat { S } _ { i+1 } ^z $
i belongs to D sub b.	$ i\in D_b $
i belongs to F to the power of S Z sub C of t.	$ i \in F^ { SZ } _C ( t ) $
i belongs to N.	$ i\in N $
i belongs to the interval from 0 to t minus 1.	$ i\in [ 0 , t-1 ] $
i belongs to the set containing 0, dot dot dot, r minus 2.	$ i\in\ { 0 , \ldots , r-2\ } $
i belongs to the set of integers from 1 to C raised to the power of asterisk.	$ i\in\ { 1 , ... , C^ * \ } $
i belongs to the set of integers from m plus 1 to n.	$ i \in \ { m+1 , \ldots , n\ } $
i belongs to V of n.	$ i\in V ( n ) $
i equals 1, dot dot dot, r sub zero minus 1.	$ i=1 , ... r_0-1 $
I equals open parenthesis, w sub 1, comma, ellipsis, w sub k, close parenthesis.	$ I= ( w_1 , \ldots , w_k ) $
I equals S cup T	$ I= S \sqcup T $
I equals the set of 0 equals t sub 0 less than t sub 1 less than dot dot dot less than t sub N equals T.	$ I = \ { 0 = t_0 < t_1 < \ldots < t_N =T\ } $
I is a proper subset of A.	$ I\subsetneq A $
I is a subset of the interval from h to positive infinity.	$ I\subset [ h , +\infty ) $
i is greater than or equal to n.	$ i \geq n $
i is less than or equal to n cubed.	$ i\leq n^ { 3 } $
I of t sub star equals 1	$ I ( t_\star ) = 1 $
i Omega n maps to h-bar omega plus i zero plus.	$ i\Omega_n \rightarrow \hbar\omega + i0^+ $
I prime sub 1 precedes G sub 1 precedes I prime sub 1.	$ I'_1\prec G_1\prec I '' _1 $
I sub 1 equals I prime sub 1.	$ I_1=I '' _1 $
i sub 1, ellipsis, i sub k belongs to the set of natural numbers.	$ i_1 , \ldots , i_k\in \mathbb { N } $
i sub 3 comma n	$ i_ { 3 , n } $
I sub AM1.5, open parenthesis, lambda, close parenthesis.	$ I_ { \text { AM1.5 } } ( \lambda ) $
I sub gamma equals 4.79 times open parenthesis 20 close parenthesis.	$ I_ { \gamma } = 4.79 ( 20 ) $
I sub matter.	$ I_ { matter } $
i sub perpendicular equals j sub perpendicular equals L sub d.	$ i_\perp=j_\perp=L_d $
I sub t belongs to V.	$ I_t\in V $
i sub X sub H Omega equals d H	$ i_ { X_H } \Omega = dH $
I subscript i superscript LCS.	$ I_i^ { \text { LCS } } $
I subset equal to the set containing 1, dot dot dot, 2N minus 1.	$ I \subseteq \ { 1 , \dots , 2N-1\ } $
i times i plus	$ i \cdot i^ { + } $
I to the power of negative x sub 2i	$ I^- ( x_ { 2i } ) $
i to the power of one equals i to the power of two.	$ i^ { ( 1 ) } = i^ { ( 2 ) } $
I to the power of tot sub ab, E	$ I^ { tot } _ { ab , E } $
i, j, belongs to the set containing 1, 3.	$ i , j\in\ { 1,3\ } $
I, J, K of epsilon belongs to S.	$ ( I , J , K ( \varepsilon ) ) \in S $
id one superscript frown id two superscript frown dot dot dot frown id n	$ id_1^\frown id_2^\frown \dots^\frown id_n $
infinity	$ \rho\in ( R , \infty ) $
infinity, script A	$ \inf\mathcal { A } $
integral sub a comma b	$ \int_ { [ a , b ] } $
iota of phi sub 1, phi sub 2	$ \iota ( \phi_1 , \phi_2 ) $
Iota prime sub i star.	$ { \iota'_i } _ * $
iota raised to the power of asterisk	$ -\iota^ { \ast } $
iota star of E equals 2H minus 3 delta.	$ \iota^ * ( E ) = 2H-3\delta $
iota sub v times u.	$ \iota_v u $
j belongs to j of i	$ j\in j ( i ) $
j belongs to S sub y.	$ j \in S_y $
j belongs to the set of 1 to c.	$ j\in \ { 1 , \ldots , c\ } $
j equals the overline of 1 comma i.	$ j = \overline { 1 , i } $
J equals the set containing 1 and 4.	$ J=\ { 1,4\ } $
j equals zero, ellipsis, n minus one	$ j = 0 , \ldots , n-1 $
j greater than or equal to k plus one.	$ j\geq k+1 $
J hat sub n, L to the power of n sub J	$ \widehat { J } _n ( L^n_ { J } ) $
J is a subset of the set containing 0, dot dot dot, n.	$ J \subseteq \ { 0 , \ldots , n\ } $
j is approximately equal to 0.024 times j sub 0.	$ j \approx 0.024 j_0 $
j is equivalent to 2i minus j.	$ j \equiv 2i-j $
j is greater than or equal to tau to the power of ell.	$ \mathfrak { j } \geq\tau^ { \ell } $
J is less than or equal to 2 m squared plus 2.	$ J\leq 2m^2+2 $
j n plus i	$ jn+i $
J of W	$ J ( W ) $
J prime of phi.	$ J ' ( \phi ) $
J slash psi goes to eta prime gamma.	$ J/\psi \rightarrow \eta ' \gamma $
J sub 1 greater than J sub 3b greater than or equal to J sub 2, J sub 3a.	$ J_1 > J_ { 3b } \geq J_2 , J_ { 3a } $
J sub 2 equals 0.48 times J sub 1.	$ J_2 = 0.48\ , J_1 $
J sub 2 to the power of i plus 1 d open parenthesis G close parenthesis	$ J_ { 2^ { i+1 } d } ( G ) $
j sub 6 equals c	$ j_6=c $
J sub i j equals negative a sub i j.	$ J_ { ij } = -a_ { ij } $
J sub one R	$ J_ { 1R } $
J sub tau sub delta.	$ J_ { \tau_ { \delta } } $
J sub z belongs to script K sub J.	$ ( J_z ) \in \mathscr { K } _J $
J subset N.	$ { J\subset\mathbb { N } } $
J to the plus or minus power of w equals J to the plus or minus power of w prime.	$ J^ { \pm } ( w ) = J^ { \pm } ( w ' ) $
J to the power of 1 sub p 2 sub p sub mu nu.	$ J^ { 1_p2_p } _ { \mu\nu } $
J to the power of omega.	$ J^ { \omega } $
j, colon, S, hookrightarrow, Y	$ j \colon S \hookrightarrow Y $
K bar pi one	$ \bar { K } \pi_1 $
K dagger K equals I	$ K^ { \dagger } K=I $
k equals d, d plus 1, d plus 2, d plus 3.	$ k=d , d+1 , d+2 , d+3 $
K equals K sub y less than or equal to K sub z.	$ K=K_y\leq K_z $
K equals m prime equals 5.	$ K=m'=5 $
k equals N pi divided by 2	$ k=N \pi/2 $
K equals two L plus one.	$ K =2L+1 $
K equals U XOR D sub 8.	$ K=U\oplus D_8 $
k is less than zero, k prime is greater than zero.	$ k < 0 , k ' > 0 $
k less than or approximately equal to 0.1 times h divided by Mpc.	$ k\lesssim0.1\ h/\text { Mpc } $
K log base 2 T	$ K\log_2 T $
k minus l	$ ( k-l ) $
k of b	$ k ( b ) $
k plus equals maximum of k comma zero	$ k^+ = \max ( k,0 ) $
k raised to the power of negative equals n.	$ k^- = n $
K star open parenthesis 892 close parenthesis plus	$ K^ { * } ( 892 ) ^+ $
k sub 1 prime, k sub 2 prime, k sub 3 prime.	$ ( k_1 ' , k_2 ' , k_3 ' ) $
k sub 1, dot dot dot, k sub s	$ ( k_1 , \dots , k_s ) $
K sub 2 superscript mu nu.	$ K_2^ { \mu\nu } $
k sub F a sub s to the power of negative one equals negative one point six five.	$ ( k_F a_s ) ^ { -1 } = -1.65 $
K sub j superscript i	$ K_j^ { ( i ) } $
k sub n squared equals two m E sub n divided by h-bar squared.	$ k_n^2=2mE_n/\hslash^2 $
K sub N star, H sub N star	$ K_N^ * , H_N^ * $
K sub N superscript plus equals K tilde sub N plus.	$ K_N^ { ++ } =\widetilde { K } _N^+ $
K sub n to the power of i sub n.	$ K_n^ { i_n } $
K sub r, open parenthesis, P sub alpha, close parenthesis.	$ K_r ( P_ { \alpha } ) $
K sub s1, s sub 2 minus s sub 1 plus 1.	$ K_ { s_1 , s_2 - s_1 + 1 } $
k sub t equals the sum from i equals 1 to 4 of k sub i.	$ k_t = \sum_ { i = 1 } ^4 k_i $
K sub T superscript perpendicular.	$ K_T^ { ( \perp ) } $
k sub v equals open parenthesis v comma P of v close parenthesis	$ k_v= ( v , P ( v ) ) $
K sub zero is approximately three halves.	$ K_0\sim 3/2 $
K tilde equals 3, 30, 50.	$ \widetilde { K } =3,30,50 $
k times R sub d much greater than 1.	$ kR_d\gg 1 $
k times v sub F divided by 2 much less than the square root of gamma sub 2 times gamma sub 3	$ kv_F/2\ll ( \gamma_2\gamma_3 ) ^ { 1/2 } $
k, ell equals plus or minus 1, ell.	$ ( k , \ell ) = ( \pm 1 , \ell ) $
kai h-bar	$ k\hbar $
kappa belongs to the set of real numbers.	$ \kappa\in \mathbb { R } $
kappa equals one two.	$ \kappa =1,2 $
kappa equals two pi divided by L sub x.	$ \kappa=2\pi/L_x $
kappa minus a.	$ \tilde a- a $
kappa minus n sub 1 plus 1	$ \kappa-n_1+1 $
kappa of n-hat colon p	$ \kappa ( \hat { n } : p ) $
kappa q, gamma q, kappa m, gamma m	$ \kappa_q , \gamma_q , \kappa_m , \gamma_m $
kappa sub 2 greater than kappa sub 3	$ \kappa_2 > \kappa_3 $
kappa sub zero less than one.	$ \kappa_0 < 1 $
kappa to the power of 2 beta.	$ \kappa^ { 2\beta } $
kappa, one	$ ( \kappa,1 ) $
ket C sub 1 C sub 2 T	$ |C_1 C_2 T\rangle $
ket k sub x, omega.	$ \left| k_ { x } , \omega \right\rangle $
Ket n equals 3, q equals 0, ket 0, is equivalent to ket 3	$ |n=3 , q=0\rangle\equiv|3\rangle $
ket three dee sub x z	$ |3d_ { xz } \rangle $
ksi and	$ actions and $
ksi over	$ videos over $
ksi sub delta sub X.	$ \xi_ { \Delta_X } $
ksi sub delta superscript star	$ \xi_ { \Delta } ^ { * } $
ksi sub i, k	$ ( \xi_ { i } ) _k $
ksi to the tau	$ \xi^\tau $
l approximately 90	$ l\approx90 $
L cosine squared of I over 2 cot gamma minus 1 of I over 2.	$ L\cos^2 ( I/2 ) \cot^ { \gamma-1 } ( I/2 ) $
L divided by the square root of 2.	$ L/\sqrt { 2 } $
L ell sub mu, comma, m sub mu, equals, open parenthesis, L ell sub nu, comma, m sub nu, close parenthesis.	$ ( \ell_\mu , m_\mu ) = ( \ell_\nu , m_\nu ) $
L ell, s belong to the interval from omega.	$ \ell , s\in [ \omega ] $
l equals 1, dot dot dot, T.	$ l=1 , \ldots , T $
L equals 25 approximately mu.	$ L=25~\mu $
L equals 94.10, sigma.	$ L=94.10\ , \sigma $
l equals two zero one.	$ l=201 $
L G of T sub 39 comma T sub 33	$ LP ( T_ { 39 } , T_ { 33 } ) $
L G one is greater than L G three.	$ LB1 > LB3 $
L greater than or equal to 11.	$ L\geq 11 $
L greater than xi	$ L > \xi $
L infinity of zero, infinity; H one.	$ L^ { \infty } ( 0 , \infty ; H^ { 1 } ) $
L is defined as L of rho sub 0.	$ L \equiv L ( \rho_0 ) $
L is defined as L sub 1.	$ L : = L_1 $
l is greater than or equal to the quantity R plus 2, multiplied by k.	$ l\geq ( R+2 ) k $
L less than or equal to N times P sub p of W.	$ L \leq \operatorname { NP } _p ( W ) $
l minus theta	$ l- { th } $
l not equal to k	$ l\neq k $
l nu b overline b: l times nu times b overline b	$ l\nu b \overline { b } $
L of 3,3.	$ L ( 3,3 ) $
L of A sub j, a sub j.	$ \mathcal { L } ( A_j , a_j ) $
L of H	$ L ( \cal H ) $
l plus 1 equals r sub 1	$ l+1=r_1 $
l prime sub k equals l sub sigma of k.	$ \ell'_k=\ell_ { \sigma ( k ) } $
l r equals the set of 5 e minus 5, 1. e minus 4, 2. e minus 4.	$ lr = \ { 5.e-5 , 1.e-4 , 2.e-4\ } $
L squared of t, infinity.	$ L^2 ( t , \infty ) $
L sub 0, L sub 1, ellipsis, L sub p.	$ L_0 , L_1 , \ldots , L_p $
L sub 1, dot dot dot, L sub m.	$ l_ { 1 } , \dots , l_ { m } $
L sub 4 equals L sub 4 open parenthesis n, K, delta, A close parenthesis greater than 1.	$ L_4=L_4 ( n , K , \delta , A ) > 1 $
L sub eff	$ L_ { \text { eff } } $
L sub gamma BI.	$ \mathcal { L } _ { \gamma \text { BI } } $
L sub I sub g 1, open parenthesis s, close parenthesis.	$ L_ { I_ { g1 } } ( s ) $
l sub i, n	$ ( l_ { i } , n ] $
L sub j is less than or approximately equal to theta raised to the power of j.	$ L_j\lesssim\theta^j $
L sub m belongs to the set of positive real numbers.	$ L_m \in \mathbb { R } _+ $
L sub Omega greater than zero.	$ L_\Omega > 0 $
L sub optim, excess	$ L_ { \text { opti , excess } } $
L sub star divided by c.	$ L_ { \star } /c $
L sub t of 1.4 is approximately equal to negative 2.6454.	$ L_ { t } ( 1.4 ) \approx -2.6454 , $
L sub t to the power of q L sub x to the power of 1.	$ L_t^qL_x^1 $
l sub t-h	$ l_ { th } $
L sub u to l, superscript spon.	$ L_ { u \to l } ^ { \text { spon } } $
L to the power of one-half times n times rho is greater than or equal to c sub 4 times the logarithm of L plus n.	$ L^ { 1/2 } n\rho \geq c_4\log ( L+n ) $
Lambda divided by 2 pi.	$ \lambda/ ( 2\pi ) $
Lambda equals d sub i times slash n sub i.	$ \lambda = d_i^ * /n_i $
lambda equals mu sub 2 divided by mu sub 1.	$ \lambda=\mu_2/\mu_1 $
Lambda equals one.	$ \lambda = ( 1 ) $
Lambda greater than zero, lambda equals zero.	$ \lambda > 0 , \lambda=0 $
Lambda is similar to one divided by omega sub p equals 5.	$ \lambda \sim 1/\omega_p=5 $
lambda of G sub 4	$ \lambda ( G_4 ) $
Lambda of I plus lambda of J is less than one.	$ \lambda ( I ) +\lambda ( J ) < 1 $
Lambda one of V equals lambda two of V equals V.	$ \lambda_1 ( V ) = \lambda_2 ( V ) = V $
Lambda plus or minus v sub 1 plus C over 2 direct sum H.	$ \lambda \pm v_1 + C/2 \oplus H $
Lambda prime.	$ \Lambda^ { \prime } $
Lambda sub 2 equals ellipsis equals lambda sub d equals 1 minus rho.	$ \lambda_2 = \ldots = \lambda_d = 1-\rho $
lambda sub a to the power of n	$ \lambda _a^n $
Lambda sub b to Z sub c s times 4000 raised to the power of negative p.	$ \Lambda_b\to Z_ { cs } ( 4000 ) ^-p $
Lambda sub i of N, i greater than or equal to 2.	$ \lambda_i ( N ) , i\geq 2 $
lambda sub I superscript i.	$ \lambda_I^i $
lambda sub j of omega	$ \lambda_j ( \omega ) $
lambda sub k of t sub i	$ \lambda_k ( t_i ) $
lambda sub k star equals negative two.	$ \lambda_ { k^ * } =-2 $
Lambda sub one.	$ \Lambda _1 $
Lambda sub u is greater than lambda sub o.	$ \lambda_ { u } > \lambda_ { o } $
Lambda sub UV equals 1800.	$ \Lambda_ { UV } = 1800 $
lambda to the power of one-fourth	$ \lambda^ { \frac { 1 } { 4 } } $
Lambda to the power of one, j.	$ \Lambda^ { 1 , j } $
langle B rangle sub Q optis	$ \langle \mathcal { B } \rangle_Q^ { opt } $
langle f sub k f sub negative k rangle	$ \langle f_\k f_ { -\k } \rangle $
Left parenthesis, Q sub 0 raised to the power of x, right parenthesis, sub x greater than 0.	$ \left ( Q_0^x\right ) _ { x > 0 } $
Left parenthesis, x, comma, y, comma, a of y, right parenthesis.	$ \left ( x , y , a ( y ) \right ) $
less than or approximately equal to ten to the power of negative eighteen.	$ \lesssim 10^ { -18 } $
less than or equal to sixty-six.	$ \leq66 $
limit as I F.	$ \lim_I F $
Limit as v approaches infinity of the absolute value of A of v equals zero.	$ \lim_ { v\to \infty } |A ( v ) |=0 $
Limit as x approaches zero of f prime of x equals zero.	$ \lim_ { x \to 0 } f ' ( x ) = 0 $
log base 10 of 0.5.	$ \log_ { 10 } ( 0.5 ) $
log I sub 0.	$ \log I_0 $
m comma S approximately equals x comma zero.	$ ( m , S ) \approx ( x,0 ) $
M divided by A equals D minus the inverse of CA times B.	$ M/A : = D - CA^ { -1 } B $
m equals 6	$ m = 6 $
M equals M.	$ M=\mathcal { M } $
m equals Q of Sigma greater than m sub H of Sigma	$ m= Q ( \Sigma ) > m_ { H } ( \Sigma ) $
M equals the minimum of n times x sub p, k times x sub p plus l times y sub p, and my sub p.	$ M=\min\ { nx_p , kx_p+ly_p , my_p\ } $
M equals the square root of p sub y squared plus m squared.	$ M =\sqrt { p_y^2+m^2 } $
M equals zero point three N.	$ M=0.3N $
m greater than or equal to 2d	$ m\geq 2d $
m is equivalent to k.	$ m \equiv k $
M land N	$ M\lhd N $
m minus j is less than L minus c.	$ m - j < L - c $
m open parenthesis U subscript h close parenthesis equals infinity.	$ m ( U_h ) =\infty $
m plus 1 equals 3	$ m+1=3 $
m plus n belongs to the set of 1, 3, ellipsis, Lambda.	$ m+n \in \ { 1,3 , \ldots , \Lambda\ } $
m plus R	$ m+R $
m prime, n, r greater than or equal to 0	$ m ' , n , r\geq 0 $
M raised to the power of u, sub L L.	$ M^ { us } _ { LL } $
m squared belongs to the interval from 0 to 2.	$ m^2\in ( 0,2 ) $
m sub 2 equals r sub 2 equals 4	$ m_2=r_2=4 $
M sub 5 equals 10 to the power of 6.	$ M_5=10^6 $
M sub c prime plus 2 raised to the power of r prime plus 2.	$ M_ { c'+2 } ^ { r'+2 } $
m sub chi sub 1	$ m_ { \chi_ { 1 } } $
m sub eta prime equals square root of 3 times m sub pi.	$ m_ { \eta^\prime } =\sqrt { 3 } m_\pi $
M sub i equals K sub i plus L sub i.	$ M_i=K_i+L_i $
m sub i j is approximately equal to u raised to the power of r sub i plus r sub j.	$ m_ { ij } \sim u^ { r_i+r_j } $
m sub N equals one	$ m_N=1~ $
m sub nu i, i equals 1, 2, 3.	$ m_ { \nu_i } \ ; ( i=1 , \ ; 2 , \ ; 3 ) $
m sub psi equals y sub psi angle phi angle	$ m_ { \psi } =y_ { \psi } \langle \phi \rangle $
m sub Q comma bare equals Z sub m comma Q m sub Q	$ m_ { Q , bare } = Z_ { m , Q } m_Q $
M sub r divided by M sub sun is approximately 0.75.	$ M_r/M_ { \odot } \approx 0.75 $
M sub star is approximately equal to 10 to the power of 11 minus 10 to the power of 12.	$ M_\star \simeq 10^ { 11 } - 10^ { 12 } $
m sub Z prime equals g prime v prime	$ m_ { Z ' } =g ' v ' $
M tilde sub t	$ \widetilde M_t $
M times F.	$ M \cdot F $
m to the power of k, subscript theta i, of u.	$ m^ { ( k ) } _ { \theta_ { i } } ( u ) $
math frak p subset A	$ \mathfrak { p } \subset A $
Mathcal F prime sub lambda, u of t equals zero.	$ \mathcal { F } ' _ { \lambda , u } ( t ) =0 $
Mathcal N equals open brace 1, ellipsis, n close brace.	$ \mathcal { N } =\ { 1 , \dots , n\ } $
Mathcal V equals open parenthesis V sub 1 comma ellipsis comma V sub n close parenthesis.	$ \mathcal { V } = ( V_1 , \dots , V_n ) $
Mathematical double-struck capital P equals the set containing capital I, capital X, capital Y, and capital Z.	$ \mathbb { P } =\ { I , X , Y , Z\ } $
mathfrak C sub e e open parenthesis f sub e close parenthesis	$ \mathfrak { C } _ { ee } ( f_e ) $
Maximum of zero, s minus d times r sub 2, is not equal to zero.	$ \max\ { 0 , s-dr_2\ } \neq 0 $
Minus one is less than or equal to alpha which is less than or equal to one.	$ -1\leq \alpha \leq 1 $
Minus one minus open parenthesis m plus one close parenthesis delta minus seven T to the power of negative one.	$ 1-4 ( m+1 ) \delta-7T^ { -1 } $
minus psi hat of s is approximately equal to b sub alpha s to the power of alpha.	$ 1-\hat { \psi } ( s ) \sim b_\alpha s^\alpha $
Minus three point zero raised to the power of plus point three underscore minus zero point seven.	$ -3.0^ { +0.3 } _ { -0.7 } $
minus tilde P	$ -\tilde { P } $
Minus zero point eight one raised to the power of plus point one two, subscript minus point one two.	$ -0.81^ { +0.12 } _ { -0.12 } $
Minus zero point zero nine nine plus or minus zero point zero five two.	$ -0.099 \pm 0.052 $
mu belongs to the set M of G.	$ \mu \in M ( G ) $
mu equals mu sub zero times K sub one dot dot dot K sub n.	$ \mu = \mu_0K_1 .... K_n $
mu equals open parenthesis l comma chi close parenthesis	$ \mu= ( l , \chi ) $
mu equals the sum over j of a sub i j times p sub j.	$ \mu=\sum_ { j } a_ { ij } p_ { j } $
mu I, Sigma I, mu F, Sigma F	$ \mu_I , \Sigma_I , \mu_F , \Sigma_F $
mu minus nu hat.	$ \hat \mu-\hat \nu $
mu of i.	$ \mu ( i ) $
mu of Xi sub 2 is greater than zero.	$ \mu ( \Xi_2 ) > 0 $
mu prime not equal to mu	$ \mu ' \neq \mu $
mu sub ell equals xi to the power of a.	$ \mu_ { \ell } = \xi^ { a } $
mu sub F equals the vector [0, 0, 0, 0] transpose.	$ \mu_F = [ 0 , 0 , 0 , 0 ] ^\top $
mu sub J to the A sub n	$ \mu_J^ { A_n } $
mu sub U A	$ \mu_ { UC } $
mu to the power of V sub a, where a belongs to V.	$ \ { \mu^V_a : a \in V \ } $
mu zero H sub a sub c1 approximately 4.0	$ \mu_0H^ { a } _ { c1 } \approx 4.0 $
much less than.	$ is much less than $
N	$ s a^3\rho \log ( b/a ) ( \log N ) ^3 $
n belongs to the set of real numbers.	$ n\in \mathbb { R } $
n divided by 2 minus n minus k equals k minus n divided by 2.	$ n/2- ( n-k ) =k-n/2 $
n equals 2, lambda equals one-sixth.	$ n=2 , \lambda=\frac { 1 } { 6 } $
N equals 36	$ N ( =36 ) $
N equals 512.	$ N { = } 512 $
N equals N raised to the power of n	$ N = N^ { ( n ) } $
N eta star goes to infinity	$ N\eta_ * \rightarrow\infty $
n is less than or equal to 4.	$ n \leqslant 4 $
n M omega prime	$ nM \omega ' $
N much greater than N star.	$ N\gg N^ * $
n not in I	$ n \not\in I $
N of 1 equals 1	$ N ( 1 ) =1 $
N of a, b equals 1	$ N ( a , b ) =1 $
N of u intersect N of v equals the set containing w	$ N ( u ) \cap N ( v ) = \ { w\ } $
N of x equals v sub 4 to the power of 1 less than 25.	$ N ( x ) =v_4^1 < 25 $
N one v belongs to T perpendicular one x M three.	$ \tilde N_1v\in T^ { \bot_1 } _xM_3 $
n prime is greater than N.	$ n ' > N $
n rho 2	$ n \rho_2 $
N squared plus N choose 3.	$ N^2 + \binom { N } { 3 } $
N sub c times the absolute value of delta mu divided by 2.	$ N_ { c } |\Delta \mu|/2 $
n sub d times minus 1 equals 0.	$ n_ { d^ * - 1 } = 0 $
n sub F superscript 1	$ n_ { F } ^ { ( 1 ) } $
N sub j plus 1	$ N_ { j+1 } , $
n sub m of t	$ n_ { m } ( t ) $
N sub nu minus 3	$ N_\nu^ { -3 } $
N sub ood	$ \mathcal { N } _ { ood } $
n sub p equals 38	$ n_ { p } =38 $
N sub p equals 8 times 15 equals 120.	$ N_ { p } = 8\cdot15 = 120 $
n sub plus or minus is greater than or equal to 2 absolute value of vector j divided by e.	$ n_ { \pm } \gtrsim 2 |\vec { j } | / e $
n sub T superscript I equals n sub T superscript V equals n sub T	$ n_T^I=n_T^V=n_T $
N sub th, Q sub th approaches infinity.	$ N_ { th } , Q_ { th } \rightarrow \infty $
N sub train equals 1000.	$ N_\text { train } = 1000 $
n subclause	$ n_ { clause } $
n z equals v	$ nz=v $
n, k belong to the set of natural numbers.	$ n , k\in\mathbb { N } $
n, r, d plus delta	$ n , r , d+ \Delta $
Nabla h sub j open parenthesis x caret star close parenthesis	$ \nabla h_j ( x^\star ) $
Nabla q sub alpha open parenthesis lambda close parenthesis	$ \nabla q_ { \alpha } ( \lambda ) $
Nabla squared ell, open parenthesis d, comma eta, close parenthesis.	$ \nabla^ { 2 } \ell\left ( d , \eta\right ) $
Nabla squared psi sub 5 squared.	$ \nabla^2 \psi_5^2 $
Nabla squared rho of x	$ \nabla^ { 2 } \rho ( x ) $
Nabla, left parenthesis, chi, dot, u to the power of infinity, right parenthesis.	$ \nabla \left ( \chi \cdot u^\infty\right ) $
natural logarithm of nu divided by mu.	$ \ln ( \nu/\mu ) $
Negative 0.12 is less than p sub parallel i divided by m sub ic is less than 0.12.	$ -0.12 < p_ { \parallel , i } /m_ic < 0.12 $
Negative 0.488 raised to the power of positive 0.014, subscript negative 0.014.	$ -0.488^ { +0.014 } _ { -0.014 } $
Negative 0.930 times y cubed.	$ -0.930y^3 $
Negative 120 degrees, 45 degrees.	$ ( { -120^o } , { 45^o } ) $
Negative 2.572 times negative 9.	$ -2.572 [ -9 ] $
Negative 4.636 plus or minus 0.021.	$ -4.636 \pm 0.021 $
Negative 5.58 raised to the power of positive 0.4, subscript negative 0.44.	$ -5.58^ { +0.4 } _ { -0.44 } $
Negative delta phi equals lambda phi.	$ -\Delta \phi = \lambda \phi $
Negative infinity is less than the square root of alpha times t, which is less than or equal to negative one.	$ -\infty < \sqrt { \alpha } \ , t \leqslant-1 $
Negative nine sixteenths.	$ -\frac { 9 } { 16 } $
Negative one point five one five plus or minus zero point zero three three.	$ -1.515\pm 0.033 $
negative one.	$ \quad -1 \quad $
Negative p sub k plus p sub 1 comma phi times p sub k minus 1 is greater than or equal to 0.	$ -p_ { k } +p_ { 1 , \phi } p_ { k-1 } \geq 0 $
Negative ten to the power of negative two, comma, ten to the power of negative two.	$ [ -10^ { -2 } ,10^ { -2 } ] $
Negative two is less than chi divided by f which is less than two.	$ -2 < \chi/f < 2 $
Negative two minus two k is less than l minus k is less than two l plus two.	$ -2-2k < l-k < 2l+2 $
Negative two p.	$ -2p $
negative two point eight seven	$ -2.87 $
Negative z d t chi plus xi.	$ -zdt_ { \chi } +\xi $
NN goes to N delta.	$ NN \to N\Delta $
Norm of G sub P sub n, sub F sub n.	$ \|G_ { P_n } \|_ { \mathcal { F } _n } $
Norm of mu star is less than or equal to r.	$ \|\mu^ * \|\leq r $
norm of the derivative of w with respect to x.	$ \|\dot w_x\| $
Norm of the dot, subscript m, comma, Omega.	$ \| \cdot \|_ { m , \Omega } $
nu belongs to X sub Q sub v	$ \nu\in X_ { Q_v } $
nu F nu.	$ \nu F_ { \nu } $
nu similar to p of x given z sub B.	$ \nu\sim p ( x\vert z_B ) $
nu sub h less than nu sub E	$ \nu_h < \nu_E $
Nu sub i equals the sum over j, k of mu sub i j times mu sub j k.	$ \nu_i=\sum_ { j , k } \mu_ { ij } \mu_ { jk } $
nu superscript s comma t subscript x greater than or equal to 2.	$ \nu^ { s , t } _x\geq 2 $
nu, m, epsilon	$ \nu , m , \epsilon $
O 4 to the negative.	$ O4^ { - } $
O of D squared times log star ell cubed.	$ O ( D^2 ( \log^ * \ell ) ^3 ) $
O of e to the power of 0 times g sub S.	$ O ( e^ { 0 } g_ { S } ) $
O of one over u.	$ O ( 1/u ) $
O sub c, l	$ O_ { c , l } $
o sub i equals capital O of s.	$ o_i=O ( s ) $
O sub k, n to the power of negative one.	$ O_ { k } ( n^ { -1 } ) $
Omega belongs to gamma.	$ \omega\in\Gamma $
Omega D prime to Omega D	$ \Omega D ' \to \Omega D $
omega divided by Omega equals negative one point two.	$ \omega/\Omega=-1.2 $
Omega equals h sub zero plus one-half.	$ \Omega=h_0+1/2 $
omega equals omega sub L comma Omega.	$ \omega = \omega_ { L , \Omega } $
Omega equals zero point eight one pi.	$ \omega=0.81\pi $
Omega of d over epsilon.	$ \Omega ( d/\epsilon ) $
Omega of S.	$ \omega ( \mathcal { S } ) $
omega prime of dot	$ \omega^ { \prime } ( . ) $
Omega sub 1 is less than omega sub 2.	$ \omega_ { 1 } < \omega_ { 2 } $
omega sub c of z.	$ \omega_c ( z ) $
omega sub i of T	$ \omega_i ( T ) $
Omega sub k given y equals 0, 1	$ \omega_ { k|y = 0,1 } = 0 $
Omega sub k plus 1 superscript 0 minus 1.	$ \Omega_ { k+1 } ^0-1 $
Omega sub negative 2 of alpha.	$ \Omega_ { -2 } ( \alpha ) $
Omega sub t equals negative one point zero three.	$ \omega_t=-1.03 $
Omega to the power of p sub X, log D prime.	$ \Omega^p_X ( \log D ' ) $
One divided by open parenthesis pi x close parenthesis plus x.	$ 1/ ( \pi x ) + x $
One divided by the quantity two raised to the power of n plus one, raised to the power of m.	$ 1/ ( 2^n+1 ) ^m $
One divided by the square root of N is approximately 0.008.	$ 1/\sqrt { N } \approx 0.008 $
One greater than or equal to r greater than one-half.	$ 1\geq r > \frac { 1 } { 2 } $
One hundred twenty-three raised to the power of d.	$ 123^d $
One is less than or equal to L, which is less than or equal to L minus two.	$ 1 \leq \ell \leq L - 2 $
One is less than or equal to q, r, both of which are between positive infinity.	$ 1 \leq q , r \leq +\infty $
One is less than x is less than y is less than infinity.	$ 1 < x < y < \infty $
One less than or equal to p, less than or equal to infinity.	$ 1\leq p\leq \infty. $
One less than or equal to T, less than or equal to N sub zero.	$ ( 1\leq T \leq N_0 ) , $
one over mu, L minus L plus psi.	$ \frac { 1 } { \mu } L_-L_+\psi $
one point five five plus or minus zero point five one.	$ 1.55\pm0.51 $
one point two nine two plus or minus zero point zero zero two.	$ 1.292\pm 0.002 $
one thousand.	$ 1,000m $
One tilde three tilde four	$ ( 1~3~4 ) $
One-half n minus epsilon.	$ \frac { 1 } { 2n } -\epsilon $
one, ellipsis, one, subscript two.	$ ( 1 , \ldots , 1 ) _2 $
one, two, dot dot dot, N minus one.	$ 1,2 , ... N-1 $
Open brace, e sub G sub 1, close brace, divided by, delta, B sub 1.	$ \ { e_ { G_ { 1 } } \ } \ \delta \ B_ { 1 } $
Open brace, phi sub y, colon, y in script Y, close brace.	$ \ { \phi_y : y \in \mathcal { Y } \ } $
Open brace, x sub i, comma, theta sub i, comma, phi sub i, close brace.	$ \ { x_i , \theta_i , \phi_i\ } $
Open bracket M, comma, M minus Q minus 1, comma, 2N plus 2, close bracket.	$ [ M , M-Q-1 , 2N+2 ] $
open bracket x, minus y, comma, zero close bracket.	$ [ x-y,0 ] $
open bracket, low, comma, high, close bracket.	$ [ low , high ] $
Open curly brace, i j, close curly brace, belongs to, capital M sub 1.	$ { ( ij ) \in M_1 } $
open parenthesis a, comma b, close parenthesis.	$ \ { ( a , b ) \ } $
Open parenthesis i, summation from j equals 1 to i of a sub j, close parenthesis.	$ ( i , \sum_ { j=1 } ^i a_j ) $
Open parenthesis p, comma, nu sub p, close parenthesis, belongs to C double prime sub k minus 1.	$ ( p , \nu_p ) \in C '' _ { k-1 } $
open parenthesis r, z, psi, semicolon r sub s, z sub s, psi sub s, close parenthesis.	$ ( r , z , \psi ; r_s , z_s , \psi_s ) $
Open parenthesis theta, comma phi, close parenthesis, belongs to the set of real numbers.	$ ( \theta , \phi ) \in \mathbb { R } $
Open parenthesis v, Sigma close parenthesis equals P star equivalent to open parenthesis 0, 0 close parenthesis.	$ ( v , \Sigma ) =P^ * \equiv ( 0,0 ) $
Open parenthesis zero comma i minus one close parenthesis.	$ ( 0 , i-1 ) $
open parenthesis zero, comma beta, comma gamma, close parenthesis.	$ ( 0 , \beta , \gamma ) $
Open parenthesis, bar, Omega, close parenthesis, raised to the power of c.	$ ( \bar\Omega ) ^c $
Open parenthesis, capital P, close parenthesis, subscript mu.	$ ( PI ) _ { \mu } $
Open parenthesis, eta raised to the power of asterisk subscript r comma i, close parenthesis, subscript i less than n.	$ ( \eta^ { * } _ { r , i } ) _ { i < n } $
Open parenthesis, lowercase ell sub gamma sub k, close parenthesis, sub k.	$ ( \ell_ { \gamma_k } ) _k $
Open parenthesis, N minus 1, divided by c raised to the power of asterisk, close parenthesis, log t.	$ ( ( N-1 ) /c^ * ) \log t $
Open parenthesis, negative s, comma, t to the power of negative one, close parenthesis, circle, alpha.	$ ( -s , t^ { -1 } ) \circ \alpha. $
Open parenthesis, one minus epsilon, close parenthesis, squared.	$ ( 1 - \varepsilon ) ^2 $
Open parenthesis, p raised to the power of e, close parenthesis, raised to the power of th.	$ ( p^ { e } ) ^ { \text { th } } $
Open parenthesis, script W, comma, script B, open parenthesis, script W, close parenthesis, close parenthesis.	$ ( { \cal W } , \mathscr { B } ( \cal W ) ) $
Open parenthesis, sigma sub i plus one minus sigma sub i, close parenthesis.	$ ( \sigma_ { i+1 } -\sigma_ { i } ) $
Open parenthesis, x raised to the power of i, comma, z raised to the power of delta, comma, i, close parenthesis.	$ ( x^ { ( i ) } , z^ { \delta , ( i ) } ) $
Open parenthesis, x sub H, comma, y sub H, comma, z sub H, close parenthesis.	$ ( x_H , y_H , z_H ) $
Open parenthesis, Z sub 1,2 superscript l, comma, Z sub 1,2 superscript u, close parenthesis.	$ ( Z_ { 1,2 } ^l , Z_ { 1,2 } ^u ] $
Open square bracket, p sub v, close square bracket, sub d plus 1, equals 0.	$ [ p_v ] _ { d+1 } =0 $
Open square bracket, phi superscript 1 wedge phi superscript 2, close square bracket.	$ [ \varphi^1 \wedge \varphi^2 ] $
P B equals Pi.	$ PB = \Pi $
p belongs to b	$ p\in b $
p belongs to E	$ p\in E $
p belongs to the set containing 1, 2, 3, and 4.	$ p \in \ { 1,2,3,4\ } $
p belongs to the set of integers union the intersection of capital Lambda and the set containing m equals zero.	$ p \in Z'\cup ( \Lambda \cap\ { m=0\ } ) $
p colon Omega to open interval 1, infinity close interval	$ p\colon\Omega\to [ 1 , \infty ) $
p divided by mu omega.	$ p/\mu\omega $
P dot	$ \mathbb { P } \ { .\ } $
P equals P sub 2 union P sub 3.	$ P=P_2\cup P_3 $
p equals q divided by k.	$ p=q/k $
p equals the quantity x minus lambda q divided by the absolute value of x minus lambda q.	$ p = \frac { x-\lambda q } { |x-\lambda q| } $
P F of phi arrow xi	$ FP ( \phi \to \xi ) $
P hat sub j	$ \hat { { \mathcal { P } } } _j $
P is greater than or equal to 2.	$ P \geq 2 $
P minus 31 times c times 163.	$ P-31c ( 163 ) $
p much greater than n to the power of negative one-half.	$ p \gg n^ { -1/2 } $
P of D to the power of 0D to the power of star plus.	$ P ( D^0D^ { * + } ) $
p of d x equals e to the power of negative u of x times d x.	$ p ( dx ) = e^ { -u ( x ) } dx $
P of Gamma, zero equals zero.	$ P ( \Gamma,0 ) =0 $
p of l, xi	$ p ( l , \xi ) $
p of M given Y sub of M	$ p ( M | Y_ { ( M ) } ) $
P of R given hat y	$ P ( R\mid \hat { y } ) $
p of S sub t sub 1, S sub t sub 2 belongs to the interval from 0 to 1.	$ p ( S_ { t_1 } , S_ { t_2 } ) \in [ 0,1 ] $
p of tau of r to the power of N sub n	$ p ( \tau ( r^N_n ) ) $
P prime	$ Q , P , P^\prime $
p raised to the power of ell of I	$ p^ { \ell ( I ) } $
P raised to the power of i, subscript max.	$ P^i_ { max } $
P sub 0, dot dot dot, P sub ell	$ P_0\cdots P_ { \ell } $
p sub 0, ellipsis, p sub m, belongs to the set of F, square brackets X.	$ p_0 , \ldots , p_m \in \mathbb { F } [ X ] $
p sub 1 belongs to the set G sub 1.	$ p_1 \in \mathcal { G } _1 $
p sub 1 equals p sub i plus k minus 1	$ p_1=p_ { i+k-1 } $
P sub 1, P sub 2, P sub negative one, two to the power of z.	$ ( P_1 , P_2 , P_ { -1,2 } ^z ) $
p sub A open parenthesis A vertical bar t comma x close parenthesis	$ p_A ( A | t , x ) $
p sub e, p sub g tilde, belongs to the interval from 0 to 1.	$ p_e , p_ { \tilde g } \in [ 0,1 ] $
p sub ell is equivalent to 1	$ p_ { \ell } \equiv1 $
P sub f divided by rho squared sub p.	$ P_f/\rho^2_p $
P sub gamma to gamma open parenthesis E close parenthesis	$ P_ { \gamma\rightarrow\gamma } ( E ) $
p sub i equals open parenthesis p sub i comma 1 comma ellipsis comma p sub i comma n close parenthesis	$ p_i= ( p_ { i,1 } , \cdots , p_ { i , n } ) $
p sub i superscript plus or minus	$ p_i^ { \pm } $
P sub i, Q sub i, R sub i	$ P_i , Q_i , R_i $
p sub i, rho sub i, from i equals 1 to N.	$ \ { p_i , \rho_i\ } _ { i=1 } ^N $
p sub mu	$ p_\mu $
p sub negative	$ p_ { - } $
P sub P S L	$ P_ { PULS } $
p sub s u s is less than or equal to one-third.	$ p_ { \text { suc } } \leq \frac { 1 } { 3 } $
p sub U of open parenthesis zeta sub U close parenthesis	$ p_U ( \zeta_U ) $
p sub zero comma i equals p sub zero	$ p_ { 0 , i } = p_0 $
P superscript s subscript mu nu	$ P^s_ { \mu\nu } $
P times a subscript i.	$ Pa_i $
P to the power of n plus 1.	$ \mathbb { P } ^ { n+1 } $
P to the power of the absolute value of N sub nu minus one.	$ \mathbb { P } ^ { |N_\nu| - 1 } $
p, d, and q	$ p , d , \text { and } q $
p, r, dot	$ ( p , r , \cdot ) $
P4 sub 12 sub 12.	$ P4_12_12 $
Partial derivative with respect to mu of natural logarithm of R sub 0 equals alpha.	$ \partial_\mu \ln { R_0 } =\alpha $
partial Omega epsilon.	$ \partial \Omega_\epsilon $
Partial Omega minus open brace x sub A to the negative power close brace.	$ \partial \Omega - \ { x_ { A^ { - } } \ } $
partial R sub j.	$ ( \partial R ) _j $
Partial squared with respect to q sub i q sub j of S is less than or equal to zero.	$ \partial^2_ { q_i q_j } \mathcal { S } \leq 0 $
partial sub j K	$ \partial_j K $
partial with respect to i and j of f	$ \partial_ { i , j } f $
Pee bee oh	$ ( PbO $
pee p to eff plus eff minus	$ pp\to F^+ F^- $
pee plus mu minus cue	$ pp \to p \mu^+ \mu^- q $
Pee raised to the integral over gamma of A	$ Pe^ { \oint_ { \gamma } \mathcal { A } } $
Phi belongs to the set of 0, 1, 2, 3.	$ \phi\in\ { 0,1,2,3\ } $
Phi equals phi of w, belongs to the set of real numbers raised to the power of n.	$ \phi = \phi ( w ) \in\mathbb { R } ^n $
phi equals r plus 1.	$ \phi = r + 1 $
phi m goes to phi.	$ \varphi_m \to \varphi $
Phi negative kappa.	$ \Phi^-_\kappa $
Phi of A raised to the power of i is greater than phi of E sub i.	$ \phi ( A^ { ( i ) } ) > \phi ( E_ { i } ) $
phi of A sub v is approximately equal to A sub v.	$ \varphi ( A_v ) \simeq A_v $
Phi of F, x, equals x to the power of n minus 6, times phi of B, x.	$ \phi ( F , x ) =x^ { n-6 } \phi ( B , x ) $
Phi of M is proportional to dN star over dM.	$ \phi ( M ) \propto dN_ * /dM $
Phi of N sub 1 equals g of N sub 1.	$ \phi ( N_1 ) =g ( N_1 ) $
Phi of W maps to U.	$ \Phi ( W ) \to U $
Phi of y sub 1 equals gamma of Phi of y sub 2	$ \Phi ( y_1 ) = \gamma ( \Phi ( y_2 ) ) $
Phi of z is less than z.	$ \phi ( z ) < z $
Phi open parenthesis omega close parenthesis belongs to script A star.	$ \Phi ( \omega ) \in\mathcal { A } ^ * $
Phi prime of tau equals zero equals zero.	$ \phi ' ( \tau=0 ) = 0 $
phi prime squared h sub ab.	$ \phi'^2h_ { ab } $
Phi star E equals E plus D.	$ \Phi_ * E=E+D $
Phi sub 1 open parenthesis ell comma r close parenthesis	$ \phi_1 ( \ell , r ) $
phi sub dot	$ \phi_ { \cdot } $
Phi sub G of t	$ \Phi_ { \text { G } } ( t ) $
Phi sub i, open parenthesis, i equals 1, 2, close parenthesis.	$ \phi_i\ ( i=1,2 ) $
phi sub n, A over B	$ \phi_ { n , A/B } $
Phi sub omega star equals phi sub negative omega.	$ \phi_\omega^ * =\phi_ { -\omega } $
Phi sub one of tau equals zero.	$ \phi_1 ( \tau ) =0 $
phi sub one prime	$ \varphi _ { 1 } ^ { \prime } $
Phi sub t sub zero superscript t sub f	$ \Phi_ { t_0 } ^ { t_f } $
Phi sub x is greater than or equal to 0.5.	$ \varphi _ { x } \geqslant 0.5 $
phi sub zero equals pi divided by 4.	$ \phi_0=\pi/4 $
Phi subset Psi	$ \Phi \subseteq \Psi $
Phi, colon, Sigma, arrow, mathbb C.	$ \phi : \Sigma\rightarrow \mathbb { C } $
Phi: D sub n to D sub n minus 1	$ \varphi : D_n \rightarrow D_ { n-1 } $
Phi: W to W prime.	$ \phi : W \rightarrow W ' $
Pi equals open parenthesis A sub 1, ellipsis, A sub K close parenthesis.	$ \Pi = ( A_1 , \dots , A_K ) $
Pi equals S to the power of z divided by tilde s.	$ \Pi = S^z/\tilde { s } $
Pi goes to phi sub pi.	$ \pi \rightarrow \varphi_\pi $
pi hat squared sub B	$ \hat { \pi } ^ { 2 } _B $
Pi maps ai to b sub sigma of i.	$ P_i\colon a_i \to b_ { \sigma ( i ) } $
Pi over two is less than or equal to phi sub i, which is less than pi.	$ \dfrac { \pi } { 2 } \leq\phi_ { i } < \pi $
Pi raised to the power of N.	$ \Pi^ { ( N ) } $
pi sub 23.	$ \pi_ { 23 } $
Pi sub h to the power of d, Pi sub e greater than zero.	$ \Pi_h^d , \Pi_e > 0 $
Pi sub N comma M times U belongs to Q sub M.	$ \pi_ { N , M } U\in Q_M $
Pi sub P colon P arrow Sigma.	$ \pi_P : P \to \Sigma $
Pi sub r of g	$ \Pi_r ( g ) $
pi sub S star.	$ \pi_S^ * $
pi to the power of k divided by tilde pi to the power of k.	$ \pi^ { ( k ) } /\tilde { \pi } ^ { ( k ) } $
pi to the power of three.	$ \pi^ { [ 3 ] } $
pi two of s sub AB.	$ \pi_2 ( s_ { AB } ) $
Pi: V to S omega.	$ \Pi : V \to S^\omega $
Plus or minus 12.6.	$ \pm { 12.6 } $
plus or minus three pi	$ \pm 3\pi $
Plus or minus three.	$ \pm3 $
plus or minus zero point six four three one six point three nine four four two i.	$ \pm 0.64304481-6.35694024 i $
Plus or minus zero point two seven.	$ \pm0.27 $
prepare subscript data	$ prepare\_data $
prime	$ ( f { * } x , X { * } x ) { = } ( f ' , X ' ) $
Product over l prime of Y sub l, p.	$ \prod_ { l \text { prime } } Y_ { l , p } $
Product over v of the fraction one plus A sub v, divided by the square root of two.	$ \prod_ { v } \frac { 1+A_v } { \sqrt { 2 } } $
Pronunciation: O of negative log delta zero.	$ \mathcal { O } ( -\log ( \delta_0 ) ) $
proportional to the quantity d dagger plus d squared.	$ \propto ( d^\dagger + d ) ^2 $
proportional to the square root of N sub gal.	$ \propto \sqrt { N_\text { gal } } $
prox one of G.	$ \text { prox } _1 ( G ) $
Psi of a equals the expectation of Y of a.	$ \psi ( a ) = \mathbb { E } [ Y ( a ) ] $
Psi of omega.	$ \Psi ( \omega ) $
Psi of x equals c times the logarithm of the absolute value of x minus x sub zero.	$ \psi ( x ) = c \log |x-x_0| $
Psi open parenthesis t, omega close parenthesis.	$ \psi ( t , \omega ) $
Psi sub i, nu belongs to the open interval from 0 to 1.	$ \psi_ { i , \nu } \in ( 0,1 ) $
psi sub n equals one.	$ \psi_n =1 $
psi sub one hundred of zero	$ \psi_ { 100 } ( 0 ) $
Psi to the power of negative square root of z plus equals zero.	$ \Psi^- ( \sqrt { z_+ } ) =0 $
q belongs to the set of 0 and 1 raised to the power of r.	$ q\in \ { 0 , 1\ } ^ { r } $
Q composed with rho raised to the power of r.	$ Q \circ \rho^r $
Q D Q inverse	$ QDQ^ { -1 } $
Q delta t	$ \mathcal { Q } ( \Delta t ) $
q equals negative one, S sub zero, belongs to Q.	$ q = ( -1 , S_0 ) \in Q $
Q equals the angle bracket Q sub 1, comma Q sub 2, comma dot dot dot, Q sub N, angle bracket.	$ Q = \langle Q_1 , Q_2 , \dots , Q_N \rangle $
q greater than or equal to ten to the power of thirty.	$ q \geq 10^ { 30 } $
q much greater than n	$ q \gg n $
Q of mu given hat mu to the power of t minus 1.	$ Q ( \mu\mid \hat\mu^ { ( t-1 ) } ) $
q of T	$ q ( T ) $
Q of x sub Q equals phi sub q of x sub Q.	$ Q ( [ x ] _Q ) =\varphi_q ( [ x ] _Q ) $
Q prime is less than or equal to Q.	$ Q ' \leqslant Q $
Q raised to the power of i, sub j, greater than zero.	$ Q^ { i } _j > 0 $
Q raised to the power of k.	$ \mathcal { Q } ^k $
Q raised to the power of zero sub S, W raised to the power of zero sub S.	$ ( Q^0_S , W^0_S ) $
Q right.	$ Q_\text { right } $
q sub 1 equals m sub 2 divided by m sub 1	$ q_1 = m_2/m_1 $
Q sub 2 is a subset of B sub 2.	$ Q_2 \subseteq B_2 $
Q sub B of k comma s	$ Q_B ( k , s ) $
q sub e, j open parenthesis omega close parenthesis not equal to 0	$ q_ { e , j } ( \omega ) \neq 0 $
q sub j belongs to Q sub l	$ q_j \in Q_l $
Q sub j equals open parenthesis b sub j plus b sub j dagger close parenthesis divided by square root of 2.	$ Q_j= ( b_j+b_j^\dagger ) /\sqrt { 2 } $
Q sub s, T sub f	$ Q_s ( T_ { f } ) $
Q tilde belongs to Psi zero sub h plus.	$ \widetilde Q \in \Psi^0_ { h , + } $
Q tilde sub 3c, open parenthesis p, comma q, close parenthesis.	$ \widetilde { Q } _ { 3c } ( p , q ) $
quantity q minus s	$ ( q-s ) $
R circle E, U	$ ( \mathcal { R } \circ \mathcal { E } ) [ U ] $
r equals 2.25 times r sub zero.	$ r = 2.25 r_0 $
r equals r sub H	$ r=r_ H $
r greater than gamma r sub m	$ r > \gamma r_m $
R greater than the maximum of 4T, R sub 0.	$ R > \max\ { 4T , R_0\ } $
r in open bracket l, comma, l e caret s close bracket	$ r\in [ l , l e^s ] $
R of T comma 1	$ R ( T , 1 ) $
R one is less than the absolute value of x, which is less than R two.	$ R_1 < |x| < R_2 $
R plus 43.7, sub -44.4.	$ ^ { +43.7 } _ { -44.4 } $
R prime of h, x	$ R ' ( \mathsf { h } , x ) $
r raised to the power of i.	$ r^i $
R raised to the power of omega sub ell.	$ ( { R } ^\omega_\ell ) $
R sim one thousand thousand.	$ R\sim 1\,000\,000 $
r squared F sub r	$ r^2 F_r $
r sub 1 greater than or equal to r sub 2 greater than 0 greater than r sub 3	$ r_1\geq r_2 > 0 > r_3 $
r sub 1 plus r sub 2 minus r sub M	$ r_1+r_2-r_M $
r sub 13 equals r sub 12 plus r sub 23	$ r_ { 13 } =r_ { 12 } +r_ { 23 } $
R sub 2 plus or minus.	$ R_2^\pm $
r sub 2, open parenthesis, dot, comma, dot, close parenthesis	$ r_2 ( \cdot , \cdot ) $
r sub 2b minus 1	$ r_ { 2b-1 } $
R sub d equals 2.6.	$ R_d = 2.6 $
R sub D plus K minus is less than R sub D plus pi minus.	$ R_ { D^+K^- } < R_ { D^+\pi^- } $
R sub d, 0 equals 2.5.	$ R_ { d,0 } =2.5 $
r sub g is greater than or approximately equal to 0.1.	$ r_g \gtrapprox 0.1 $
r sub i is greater than or equal to zero.	$ r_i\geq 0 $
R sub i of k.	$ R_i ( k ) $
R sub j superscript R sub j.	$ R_j^HR_j $
R sub j union C sub i is a subset of V of W minus S.	$ R_j \cup C_i \subseteq V ( W ) -S $
r sub n greater than or equal to zero.	$ r_n\geq 0 $
r sub n m.	$ r_ { nm } $
R sub n over p	$ \ln { R_ { n/p } } $
R sub n.	$ \mathcal { R } _n $
r sub one to the power of alpha	$ r_1^ { ( \alpha ) } $
R sub t plus 1 equals R sub t set minus a prime.	$ R_ { t+1 } =R_t\setminus\ { a'\ } $
R sub u superscript open parenthesis lambda, n close parenthesis open parenthesis i, j close parenthesis equals zero.	$ R_u^ { ( \lambda , n ) } ( i , j ) =0 $
r sub zero equals one point seven four six.	$ r_0=1.7436 $
R to M of R	$ R\to M ( R ) $
R vector of r vector.	$ \vec { R } ( \vec { r } ) $
Ree of dot	$ Refine ( . ) $
Residue sub F.	$ { \sf Resist } _F $
Rho equals epsilon times arrow to zero.	$ \rho = \epsilon \to 0 $
rho equals lambda of t times r.	$ \rho = \lambda ( t ) r $
rho hat sub k.	$ \hat { \rho } _k $
rho minus kappa rho one minus rho minus one	$ \rho -\kappa \rho ( 1 - \rho ) - 1 $
rho of a sub 1	$ \rho ( a_1 ) $
Rho similar to exponential negative alpha times t.	$ \rho \sim \exp ( -\alpha \ , t ) $
rho star open parenthesis s sub j comma s sub k close parenthesis	$ \rho^ * ( s_j , s_k ) $
rho sub 23 2	$ \rho_ { 23,2 } $
rho sub lambda	$ \ ; \rho_ { \Lambda } $
Rho sub m, evaluated at G sub F sub v.	$ \rho_ { \mathfrak { m } } |_ { G_ { F_v } } $
Rho sub mid equals open parenthesis 1.3 plus or minus 0.8 close parenthesis.	$ \rho_ { mid } = ( 1.3\pm0.8 ) $
Rho sub n times open parenthesis delta V sub n close parenthesis to the power of one-third divided by rho.	$ \rho_n ( \delta V_n ) ^ { 1/3 } /\rho $
rho sub p superscript X	$ \rho_p^X $
Rho sub pi of T	$ \rho_\pi ( T ) $
rho sub zero.	$ \rho_\circ $
rho to the power of X sub one-half, L.	$ \rho^ { X } _ { 1/2 , L } $
s and sigma, belonging to the interval from 0 to 1.	$ s , \sigma \in [ 0,1 ] $
S belongs to Sigma of k, d.	$ S\in \Sigma ( k , d ) $
s belongs to the interval from 0 to delta f.	$ s \in [ 0 , \delta_f ] $
S equals 742 plus or minus 65.	$ \mathsf { S } =742\pm65 $
s equals k plus 1 minus i.	$ s = k+1-i $
s equals square root of the sum of s sub i squared divided by b sub i.	$ s=\sqrt { \sum S_i^2/B_i } $
S equals the set containing u, v, and w.	$ S = \ { u , v , w\ } $
s equals theta minus pi over 2	$ s=\theta -\pi /2 $
s is not equal to eta.	$ s \neq \eta $
S of R sub i, S of R sub i dual	$ S ( R_i ) , S ( R_i ) ^\vee $
S raised to the power of g, open parenthesis, k, comma, mu, close parenthesis.	$ S^g ( k , \mu ) $
S raised to the power of n minus 1.	$ S^ { n - 1 } $
S raised to the power of Pi subscript alpha.	$ S^\Pi_ { \alpha } $
s raised to the power of star, left arrow T of s comma a.	$ s^ * \leftarrow T ( s , a ) $
s sub 1, dot dot dot, s sub n minus 1 belongs to the interval from 0 to 1.	$ s_1 , ... , s_ { n-1 } \in [ 0,1 ] $
s sub 1, s sub 2 belongs to the interval 0 to alpha minus 1.	$ s_1 , s_2 \in [ 0 , \alpha-1 ] $
s sub 2, comma, s sub 3.	$ ( s_2 , s_3 ) $
s sub a equals zero.	$ s_a=0 $
S sub c, S sub e	$ ( S_c , S_e ) $
s sub i minus 1 minus 1	$ ( s_ { i-1 } -1 ) $
s sub K hat is greater than zero.	$ s_ { \hat K } > 0 $
S sub m, k equals 0	$ S_ { m , k } = 0 $
S sub phi, N not equal to zero.	$ S_ { \varphi , N } \neq 0 $
S sub Q equals s sub eq times p.	$ S_Q = s_ { eq } p $
S sub s i minus y sub s i t	$ S_ { s i } -y_ { s i t } $
S subscript ell is similar to R superscript 0.	$ S_\ell \sim R^0 $
S superscript open parenthesis n comma k close parenthesis.	$ \mathbb { S } ^ { ( n , k ) } $
S T R equals zero point two four less than A C R.	$ sCTR=0.24 < aCTR $
S-L sub l	$ SCL_l $
S, f sub gamma, h	$ S ( f_ { \gamma , h } ) $
s' and two	$ 's and two $
scale.	$ and scale $
Seven g.	$ 7g $
seven not equal to zero.	$ \,7\ , \neq\ , 0 $
seven point zero zero four one zero	$ 70.00_ { 4.10 } $
seven six point six five	$ 762.65 $
seven times ten to the power of zero	$ 7\cdot 10^ { 0 } $
seventeen minus twenty-eight.	$ 17-28 $
seventeen point eight eight nine.	$ 17.8389 $
seventeen point one two four	$ 17.124 $
seventeen point two seven plus or minus zero point one zero.	$ 17.27\pm0.10 $
seventy-nine point five two.	$ 798.52 $
shows a positive cosine.	$ shows a positive correlation ( $
Sigma belongs to G sub p sub i.	$ \sigma \in G_ { \mathfrak { p } _i } $
sigma equals 0.1, 0.2, 0.3, 0.4.	$ \sigma = 0.1 , 0.2 , 0.3 , 0.4 $
sigma equals sigma prime.	$ \sigma = \sigma ' $
Sigma four of p.	$ \sigma_4 ( p ) $
Sigma is a subset of A.	$ \Sigma\subseteq A $
Sigma n equals sigma sub n comma 1 divided by L ell.	$ \varsigma_n =\sigma_ { ( n,1 ) } /L\ell $
Sigma sub 18 equals 0.34 plus or minus 0.01.	$ \sigma_ { 18 } =0.34\pm0.01 $
Sigma sub 2, n minus r.	$ \Sigma_ { 2 , n-r } $
Sigma sub c, D sub s	$ \Sigma_ { c } D_ { s } $
Sigma sub i comma j equals 0.2 for all i not equal to j.	$ \Sigma_ { i , j } = 0.2 ~\forall i\ne j $
Sigma sub i greater than zero.	$ \varsigma_i > 0 $
sigma sub i, zero	$ { \sigma } _ { i , 0 } $
Sigma sub k.	$ \Sigma _k $
sigma sub n is a subset of K sub n.	$ \sigma_n \subset K_n $
Sigma sub one comma two equals r sub V	$ \Sigma_ { 1,2 } =r_ { V } $
sigma sub P	$ \sigma_\P $
sigma sub s equals negative nine.	$ \sigma_s=-90 $
Sigma sub SB, T sub s to the power of 4.	$ \sigma_ { SB } T_s^4 $
sigma sub tot open parenthesis phi A close parenthesis.	$ \sigma_ { tot } ( \phi A ) $
sigma sub x y superscript T T.	$ \sigma_ { xy } ^ { TOT } $
sigma, colon, delta to the power of n, to F.	$ \sigma \colon \Delta^ { n } \to F $
Sigma, open parenthesis, P sub 1, vertical bar, P sub 2, close parenthesis.	$ \sigma\left ( P_1\middle |P_2\right ) $
Sigma, open parenthesis, z sub i, superscript T, close parenthesis.	$ \sigma ( z_ { i } ^T ) $
Sigma, sub psi to the power of m sub psi minus k, open parenthesis a, close parenthesis.	$ \sigma_\psi^ { m_\psi-k } ( a ) $
sim zero point three three	$ \sim0.33\ , $
sim zero point zero six M sub solar mass	$ \sim0.06M_ { \odot } $
similar to two hundred.	$ \sim20,000 $
sine squared theta divided by two.	$ \sin ^ { 2 } \theta /2 $
sine squared theta equals x squared plus y squared	$ \sin^2\theta=x^2+y^2 $
six point one six nine.	$ 61.396 $
six point six five five.	$ 4.645 $
Six point two, subscript, backslash, minus point zero.	$ 60.2_ { \backslash-3.0 } $
sixty point two hundred plus or minus nine point nine nine.	$ 64.20\pm9.09 $
SP sub i superscript t	$ \mathcal { SP } _ { i } ^ { t } $
Square root of the derivative of x squared.	$ \sqrt { \dot { x } ^2 } $
Square root of the quantity z star, G of t.	$ \sqrt [ z^ * ] { G ( t ) } $
St approximately 0.27.	$ St \approx 0.27 $
star sub plus or minus zero point zero eight.	$ ^ { * } _ { \pm 2.008 } $
sub 92 to the power of 238 U	$ _ { \ , \ , \,92 } ^ { 238 } \text { U } $
sub h, squared plus.	$ _ { h } ^ { 2+ } $
sub k plus L minus 1	$ _ { k+L-1 } $
Subscript 18.09 Superscript 20.75	$ _ { 18.09 } ^ { 20.75 } $
Subscript 22.81 Superscript 27.60.	$ _ { 22.81 } ^ { 27.60 } $
Sum from i equals 1 to ka sub i squared equals 1.	$ \sum_ { i=1 } ^ka_i^2=1 $
Sum from k equals 1 to K of f sub k equals 0.	$ \sum_ { k=1 } ^K f_k = 0 $
Sum over j in s, beta sub j, T squared plus 1.	$ \sum_ { j \in s } \beta_ { j , T } ^2 + 1 $
SW sub omega comma plus open parenthesis A close parenthesis equals zero.	$ SW_ { \omega , + } ( A ) =0 $
T approximately 50	$ T\approx 50~ $
t belongs to the interval from t sub 0 to t sub 1.	$ t\in [ t_ { 0 } , t_ { 1 } ) $
t belongs to the open interval between a sub i and b sub i.	$ t \in ( a_i , b_i ) $
t belongs to the open interval from 0 to one-half.	$ t\in ( 0 , 1/2 ) $
T belongs to the set of capital T.	$ T \in \mathcal { T } $
t comma theta comma phi	$ \ { t , \ , \theta , \ , \phi\ } $
T divided by T sub m equals 0.6.	$ T/T_ { m } = 0.6 $
T divided by T sub m is less than one point zero.	$ T/T_ { m } < 1.0 $
t equals 1, dot dot dot, 4	$ t=1 , \dots , 4 $
t equals a times b	$ t=ab $
t equals open parenthesis, ell minus 1, close parenthesis, W plus 1.	$ t= ( \ell-1 ) W+1 $
t equals T times x sub 0.	$ t = T x_0 $
t equals t-tilde sub n.	$ t=\tilde t_n $
t equals thirty-one.	$ t=31 $
T equals z plus open parenthesis p z close parenthesis to the power of h plus 1 z q.	$ T=z + ( pz ) ^ { h+1 } zq $
T equals zero point eight eight times e times V.	$ T=0.88eV $
T equals zero point five, dot dot dot, zero point zero.	$ T = 0.5 , \dots , 6.0 $
T goes to negative infinity.	$ T\to-\infty $
T greater than p k.	$ T > pk $
t greater than t sub N.	$ t > t_N $
T is equal to the set containing 0, 1, dot dot dot, T minus 1.	$ [ T ] : = \ { 0,1 , \cdots , T-1\ } $
t is not equal to s.	$ t \neq s $
t minus t sub zero	$ t-t_0 $
t much less than n.	$ t \ll n $
t much less than t sub s.	$ t\ll t_s $
t not equal to Lambda X dot u	$ t \neq \Lambda X.u $
T of c sub 1, dot dot dot, T of c sub k	$ T ( c_1 ) , \dots , T ( c_k ) $
T of E is defined as Z times D times Z inverse.	$ T ( E ) : =ZDZ^ { -1 } $
T of s2 times e is not equal to sigma i.	$ T ( s_2\cdot e ) \neq \sigma_i $
T of T sub 1, T sub 2, l	$ T ( T_ { 1 } , T_ { 2 } , l ) $
T of X sub 1, c sub 1, c sub m prime.	$ T ( X_ { 1 } , c_ { 1 } , c_ { m ' } ) $
t plus 2 Gamma plus 2 Delta	$ \mathtt { t } +2\Gamma +2\Delta $
T raised to the power of alpha is a subset of T.	$ T^ { \alpha } \subseteq T $
t raised to the power of k, l.	$ t^ { k , l } $
T raised to the power of pi sub k, U raised to the power of k, equals T star U raised to the power of k.	$ T^ { \pi_k } U^k=T^ { \star } U^k $
t raised to the power of star, less than infinity.	$ t^\star ~ ( < \infty ) $
t sub 0 belongs to the open interval from 0 to 1/2.	$ t_0\in ( 0,1/2 ] $
T sub 0 divided by T raised to the power of nu.	$ ( T_ { 0 } /T ) ^ { \nu } $
t sub 0 equals 9 pi divided by 10 minus 3 divided by epsilon.	$ t_ { 0 } = 9 \pi / 10 - 3 / \epsilon $
t sub 0 equals open brace t sub 1, t sub 2, ellipsis close brace	$ \ t_0 = \ { t_1 , t _2 , \dots\ } $
t sub 0 plus T sub i is less than t sub f less than infinity	$ t_ { 0 } +T_i < t_f < \infty $
T sub 0 superscript k	$ T_ { 0 } ^ { ( k ) } $
t sub 1 L equals 0, t sub 0 equals 0.	$ t_ { 1L } =0 , t_0=0 $
T sub 2 sub K superscript s c	$ T_ { 2_K } ^ { sc } $
T sub c equals A times open parenthesis H sub c minus H close parenthesis to the power of phi.	$ T_ { c } =A ( H_ { c } -H ) ^ { \phi } $
t sub c prime	$ t_ { c } ^ { ' } $
T sub d p superscript M sub 2 minus O	$ T_ { dp } ^ { M_ { 2 } -O } $
T sub i comma j equals T sub i T sub i plus one dot dot dot T sub j.	$ T_ { [ i , j ] } =T_iT_ { i+1 } \dots T_j $
T sub i goes to T infinity.	$ T_i \to T_\infty $
T sub j comma k superscript v t.	$ T_ { j , k } ^ { vt } $
t sub k equals k delta sub t	$ t_k = k\Delta_t $
t sub mu equals open parenthesis t sub 0 plus t sub 1 close parenthesis divided by 2	$ t_\mu= ( t_0+t_1 ) /2 $
T sub n equals theta star plus little o sub p of 1.	$ T_n=\theta_\star+o_p ( 1 ) $
t sub N greater than t sub N minus 1 greater than ellipsis greater than t sub 1	$ t_N > t_ { N-1 } > \cdots > t_1 $
T sub n minus T sub n minus 1.	$ T_n - T_ { n-1 } $
T sub p approximately 6.	$ T_p \approx 6 $
t sub p prime	$ t_ { pp } ^ { \prime } $
T sub P superscript T.	$ \mathbb { T } _P^ { T } $
T sub s belongs to the set of positive real numbers.	$ T_s \in \mathbb { R } _ { > 0 } $
T sub v V is isomorphic to T sub v of G v direct sum N sub v.	$ T_v V \cong T_v ( Gv ) \oplus N_v $
t sub zero equals t.	$ t_0=t $
T times f sub n	$ \ { Tf_n\ } $
tall-dots sub i k sub i	$ \liminf_i k_i $
Tau belongs to the set of numbers from 1 to n.	$ \tau\in [ n ] $
tau belongs to the set T of A.	$ \tau\in T ( A ) $
Tau ell comma q.	$ \tau ( \ell , q ) $
Tau of H bar equals Tau of L union Tau of H.	$ \tau ( \bar H ) = \tau ( L ) \cup \tau ( H ) $
Tau of Sigma is a subset of Sigma.	$ \tau ( \Sigma ) \subset\Sigma $
Tau of w is not equal to zero.	$ \tau ( \vec w ) \neq 0 $
Tau r tends to zero.	$ \tau_r \rightarrow 0 $
Tau sub B open parenthesis omega comma t close parenthesis equals t.	$ \tau_B ( \omega , t ) =t $
tau sub p to the power of negative three-fourths.	$ \tau_p^ { -3/4 } $
tau sub t sub b sub n divided by n	$ \frac { \tau_ { tb_n } } { n } $
tau sub zero is greater than or equal to ten.	$ \tau_ { 0 } \gtrsim10 $
TE bar sub zero point P is isomorphic to TM bar sub P direct sum E bar sub P.	$ TE |_ { 0_P } \cong TM|_P \oplus E|_P $
The absolute value of A of a minus the dot product of varpi sub p and t is much greater than 1.	$ |A ( a ) -\dot\varpi_p|t\gg 1 $
The absolute value of B equals 2.8.	$ |B| = 2.8 $
The absolute value of J is approximately equal to U sub 1 divided by 4.	$ |J|\sim U_1/4 $
The absolute value of m is equal to the square root of the quantity Q squared plus U squared divided by I.	$ |m|=\sqrt { Q^2+U^2 } /I $
The absolute value of Q is greater than or equal to the absolute value of Q sub i.	$ |Q| \geq |Q_i| $
The absolute value of w is less than three times the absolute value of v.	$ \left|w\right| < 3\left|v\right| $
The absolute value of x sub i equals g sub i.	$ |x_i|=g_i $
The amplis of d.	$ are the amplitudes of $
the angle bracket u sub n u sub n.	$ \langle u_n u_n \rangle $
The bar H sub N plus is a subset of U sub N plus.	$ \bar { H } _N^+\subset U_N^+ $
the ceiling of two divided by epsilon.	$ \lceil2/\epsilon\rceil $
The derivative of p sub 1 with respect to e sub 1 equals p sub 1 times e sub 2 equals e prime.	$ p_1 ( e_1 ) = p_1 ( e_2 ) = e ' $
the derivative of Q with respect to r	$ -\dot { Q } _r $
The derivative of t with respect to t equals 2 times N.	$ t'=2N $
the expectation value of the product of S sub i and S sub j.	$ \langle \ { S_ { i } S_ { j } \ } \rangle $
The fraction one over q equals one over two.	$ \frac { 1 } { q } = \frac { 1 } { 2 } $
The FSR equals c divided by 2L.	$ \text { FSR } =\frac { c } { 2L } $
the identity function on X belongs to S	$ \text { id } _X\in S $
The infinity-star norm of x is equal to the one norm of x.	$ \|\cdot\|_ { \infty , * } = \|\cdot\|_1 $
the interval from a to b	$ [ a-b ] $
the interval from n (inclusive) to 2n (exclusive).	$ \left ( n,2n\right ] $
the interval from zero to T sub s minus one.	$ [ 0 , T_s -1 ] $
The inverse tilde S of x.	$ \tilde { S } ^ { -1 } R [ x ] $
The k-th transformation operator T, indexed by ts and c.	$ \mathcal { T } ^k_ { [ ts , c ] } $
The ket vector denoted by the absolute value of rho raised to the star power of k, double greater than.	$ |\rho^ { * ( k ) } \rangle\rangle $
The limit as n approaches infinity of the limit as m approaches infinity of m sub n equals zero.	$ \lim_n \lim_m \varphi^m_n = 0 $
The negative 26.39 raised to the power of positive 28.92.	$ _ { -26.39 } ^ { +28.92 } $
The norm of S of t.	$ \ { \|S ( t ) \|\ } $
The norm of X sub zero minus x is less than or equal to ch sub n.	$ \|X_0-x\| \leq ch_n $
The P sub 1 times tau sub 1 equals pi.	$ \mathcal { P } _ { 1 } \tau_ { 1 } =\pi $
The pair (tau, 1) belongs to the set of zero, one raised to the power of ell plus one.	$ ( \tau,1 ) \in\ { 0,1\ } ^ { \ell+1 } $
The partial derivative of f with respect to x sub d equals one.	$ \frac { \partial f } { \partial x_d } =1 $
The partial derivative with respect to t of y sub D equals one.	$ ( \partial/\partial t ) y_D=1 $
The quantity a sub 0 plus a divided by a sub 1 equals 1.0234253955 and so on.	$ ( a_0 + a ) /a_1 = 1.0234253955\ldots $
The quantity d sub Z minus d sub T is greater than d sub A.	$ ( d_Z - d_T ) > d_A $
The quantity u dot n, all squared.	$ ( u\cdot n ) ^2 $
The ratio of K sub 1 to N tends to alpha.	$ \frac { K_1 } { N } \to \alpha $
The real part of phi sub i tends to infinity.	$ \Re ( \varphi_i ) \to \infty $
the real part of W	$ \operatorname { Re } ( W ) $
The set containing t, x, y, and phi.	$ \ { t , x , y , \varphi\ } $
The set of alpha sub n, for n greater than or equal to 1.	$ \ { \alpha_n \ } _ { n \geq 1 } $
The set of L sub v to the power of j, where i equals j, raised to the power of n.	$ \ { L_v^j\ } _ { i=j } ^n $
The set of P sub i raised to the power of N.	$ \ { P_i\ } ^N $
The set of pi sub k, for k in the set of K.	$ \ { \pi_k\ } _ { k \in \mathcal { K } } $
the set of positive real numbers.	$ \xi= ( \xi_n , n \in \mathbb { R } _ { + } ) $
The set of theta raised to the power of N, sub N.	$ \ { \theta^N\ } _N $
the set of V sub h raised to the power of r.	$ [ \mathring V_h^r ] $
The square of the quantity delta u.	$ { ( \Delta u ) } ^2 $
The sum from i equals 1 to n of the overline of p sub i times r sub i is less than zero.	$ \sum_ { i=1 } ^n\overline { p_ir_i } < 0 $
The sum of d and z equals 4.	$ d+z = 4 $
the sum of g sub i squared equals one.	$ \sum g_i ^2 =1. $
The sum over A of Delta A to the power of S cubed equals 2.	$ \sum_A \Delta_A^ { S^3 } =2 $
The summation from k equals 1 to m of i sub n sub k.	$ \sum_ { k=1 } ^ { m } i_ { n_ { k } } $
The tilde epsilon equals negative one.	$ \tilde { \varepsilon } = -1 $
The tilde of u raised to the power of nu equals A inverse times u raised to the power of mu.	$ \tilde u^\nu=A^ { -1 } u^\mu $
The tilde r equals r sub v sub h.	$ \widetilde { r } =r_ { v_ { h } } $
The union of U prime sub n equals V of X prime.	$ \cup U'_n=V ( X ' ) $
The value of f sub j is equal to e sub 3 plus epsilon sub j times e sub j.	$ f_j = e_3+\epsilon_j e_j $
The value of mu sub h is equal to one-fourth plus delta sub h squared.	$ \mu_h = 1/4 + \delta_h^2 $
The value of T sub A is equal to the sum from i equals 1 to m of x sub i.	$ T_A = \sum_ { i=1 } ^m x_i $
The value of X sub m is equal to epsilon to the power of 4m less than epsilon to the power of 4n.	$ X_m = \varepsilon^4 m < \varepsilon^4n $
The variable ell is less than or equal to ell, multiplied by the quantity g bar sub ell of x.	$ \ell \leq \ell ( \bar { g } _\ell ( x ) ) $
Theta equals 50 degrees.	$ \theta=50^\circ $
Theta equals pi minus lambda times k-tilde.	$ \theta =\pi -\lambda \tilde k $
Theta equals the inverse cosine of Z.	$ \theta=\cos^ { -1 } Z $
Theta is less than theta sub c.	$ \theta < \theta_\text { c } $
Theta m superscript r, theta m superscript t, in the interval from 0 to 2 pi.	$ \theta_m^r , \theta_m^t\in [ 0,2\pi ] $
theta minus of r is greater than zero.	$ \theta_- ( r ) > 0 $
Theta one equals negative forty degrees.	$ \theta_1=-40^\circ $
Theta one plus theta two equals pi.	$ \theta_1+\theta_2=\pi $
Theta raised to the power of lambda bar mu, subscript J.	$ \theta^ { \overline { \lambda } [ \mu ] } _J $
Theta star sub 1	$ \Theta^ * _1 $
Theta sub 13.	$ \theta_ { 13 } $
Theta sub a belongs to the interval from 0 to pi over 2.	$ \theta_a\in [ 0 , \pi/2 ] $
theta sub D equals f of Ca.	$ \theta_D=f ( Ca ) $
theta sub k, k prime	$ { { \theta _ { k , k ' } } } $
theta sub L less than theta sub U.	$ \theta_L < \theta_U $
Theta sub mu divided by D equals 0.011.	$ \theta _\mu/D= 0.011 $
Theta sub n minus k superscript open parenthesis 0 comma n close parenthesis equals zero.	$ \theta_ { n-k } ^ { ( 0 , n ) } =0 $
theta times the quantity one minus theta raised to the power of negative one.	$ ( \theta ( 1-\theta ) ) ^ { -1 } $
Theta zero x plus x to the power of theta one.	$ \theta_0 x+x^ { \theta_1 } $
thirteen thousand eight hundred sixty.	$ 138560 $
Three A prime equals V plus three theta.	$ 3A ' = V + 3\theta $
Three hundred thousand.	$ 300,000 $
Three hundred twenty-three minus c sub x sub two	$ 3e4 ( 0.023 - c_ { x_2 } ) $
Three n squared minus n plus two a sub 2 minus a sub 1 squared plus a sub 1 minus two n a sub 1 all over twelve.	$ \frac { 3n^2-n+2a_2-a_1^2+a_1 -2na_1 } { 12 } $
three norm one.	$ 3\|1 $
three p to three d.	$ 3p\to 3d $
Three point zero eight plus or minus one point one two nine.	$ 3.088\pm 1.211 $
three raised to the power of six point six.	$ 3^4.6 $
three times ten to the power of negative three.	$ 3.\cdot 10^ { -3 } $
tilde beta is equivalent to 3 beta divided by 2 kappa	$ \tilde { \beta } \equiv 3\beta/ ( 2\kappa ) $
tilde C sub gamma superscriptknown as the ideal law	$ \tilde { C } _\gamma^\text { ideal } $
tilde p belongs to open interval negative infinity, positive infinity.	$ \tilde { p } \in ( -\infty , \infty ) $
tilde P sub G	$ \widetilde P_G $
tilde u sub omega	$ \tilde { u } _\omega $
tilde w equals open parenthesis x of v comma y of w close parenthesis	$ \tilde { w } = ( x ( v ) , y ( w ) ) $
tilde X sub g	$ \tilde { X } _g $
to the power of	$ \pi_1 : ( E_1 , h^ { E_1 } ) \to X_1 $
to the power of negative five.	$ ^ { 2-5 } $
Tr of rho Y divided by alpha n.	$ Tr ( \rho Y ) /\alpha_n $
trans sub c c	$ Trans_ { { enc } } $
Twenty k.	$ 20k $
Twenty point zero, raised to the power of positive three point six, subscript negative four point six.	$ 20.0\ ; ^ { +3.6 } _ { -4.6 } $
Twenty-four divided by four equals six point zero.	$ 24/4 = 6.0 $
Twenty-one thousand five hundred and fifty-nine plus or minus hundred hundred forty-four point zero K.	$ 2158.39\pm { 154.04 } ~\text { K } $
Two arrow three arrow five	$ 2\rightarrow 3 \rightarrow 5 $
Two f approximately epsilon squared.	$ { 2f\approx \epsilon^2 } $
two hundred seventy-three point six.	$ 22736.3 $
Two is less than or equal to p, which is less than or equal to six.	$ 2 \leq p \leq 6 $
Two J sub ab plus h greater than two J sub one.	$ 2 J_ { ab } + h > 2 J_ { 1 } $
two L minus three	$ ( 2L-3 ) $
Two point nine sub plus or minus one point two.	$ 20.9_ { \pm 1.2 } $
two point six seven seven plus or minus zero point zero nine nine.	$ 2.687 \pm 0.029 $
two sine logarithm n.	$ 2\lg\lg n $
Two thousand six hundred seventeen raised to the power of positive thirty-six, sub thirty-five.	$ 2617^ { +36 } _ { -35 } $
Two to the power of ell is greater than n squared.	$ 2^\ell > n^2 $
two to the power of L sub t minus L times S.	$ 2^ { L_t-L } S $
Two to the power of thirteen, absolute value of H.	$ 2^ { 13 } |\mathcal { H } | $
U arrow V left arrow W	$ U \rightarrow V \leftarrow W $
u belongs to L squared of Omega, g.	$ u\in L^2 ( \Omega , g ) $
u belongs to N sub 2.	$ u \in N_2 $
u belongs to the set of integers modulo m sub k.	$ u \in \mathbb { Z } \ ( \text { mod } \ m_k ) $
u dot nu equals zero.	$ u\cdot\nu=0 $
u equals the norm of p minus r.	$ u=\|p-r\| $
U equals the set of positive real numbers.	$ U= \mathbb { R } ^ { + } $
u equals tilde r equals zero.	$ u = \tilde r = 0 $
u equals u sub zero, v equals v sub zero, u sub zero v sub zero not equal to zero.	$ u=u_0 , v=v_0 , u_0v_0\neq0 $
u equals zero point one.	$ u= ( 0,1 ) $
u is distributed as L with parameters Z plus T minus t.	$ u\sim\mathcal { L } ( Z^+_ { T-t } ) $
U minus 3.	$ U^-_3 $
u of r equals u of u sub 0 of r	$ u ( r ) = u ( u_0 ) ( r ) $
U of tau.	$ U ( \tau ) $
u of x equals x squared	$ u ( x ) =x^2 $
u of x times e of x equals x times e of u of x equals e of x.	$ u ( x ) e ( x ) = xe ( u ( x ) ) = e ( x ) $
u of x, t equals e to the power of negative alpha t times sine of x.	$ u ( x , t ) =e^ { -\alpha t } \sin ( x ) $
u of xi sub n	$ u ( \xi_n ) $
U perpendicular is a subset of or equal to U.	$ U^\perp\subseteq U $
u plus or minus.	$ { \mathtt { u } } ^ { \pm } $
U prime is a subset of the set of integers modulo ell, excluding zero.	$ U'\subset\mathbb { Z } _ { \ell } -\ { 0\ } $
u raised to the power of 1 sub k equals u raised to the power of 0 sub k.	$ u^1_k = u^0_k $
u raised to the power of alpha, multiplied by u raised to the power of beta.	$ u^\alpha u^\beta $
U raised to the power of l, sub l greater than or equal to 0.	$ \ { U^l\ } _ { l \geq 0 } $
u raised to the power of nu to the power of n sub j.	$ u^ { \nu^n_j } $
u restricted to negative infinity equals zero.	$ u|_ { -\infty } =0 $
u sub 1 equals u sub t x, zeta sub 1, nu	$ u_1=u_ { tx , \zeta_1 , \nu } $
u sub 1 of sigma belongs to F sub p star	$ u_1 ( \sigma ) \in F_\mathfrak { p } ^\ast $
u sub 1 plus u sub 2 minus 2 u star	$ u_1 + u_2 - 2u^ * $
U sub i times D sub i times V sub i transpose.	$ U_i D_i V_i^\top $
u sub k of r equals tau	$ u_k ( r ) = \tau $
u sub tau of Y	$ u_\tau ( Y ) $
u subscript minus.	$ u_ { \minus } $
u to the power of k plus one, v, zero	$ ( u^ { k+1 } , v,0 ) $
U two sub L, U one sub Y	$ SU ( 2 ) _L , U ( 1 ) _Y $
up	$ { \it up } $
up arrow	$ \ , ( \uparrow ) $
Up arrow divided by down arrow.	$ \uparrow/\downarrow $
v approximately 246 gigaelectron volts	$ v\approx 246\text { GeV } $
v bar of 0 equals alpha	$ \bar { v } ( 0 ) = \alpha $
V belongs to T sub Y M sub n	$ V\in T_Y\mathcal { M } _n $
v comma chi.	$ ( v , \chi ) $
v comma zero	$ ( v,0 ) $
v equals the ket psi	$ v=\tanh\psi $
V G of x	$ \mathcal { V } [ G ] ( x ) $
V minus p.	$ V-p $
V of C comma s equals 1.	$ V ( C , s ) =1 $
V of the absolute value of H.	$ V ( |H| ) $
V prime belongs to G sub p prime of V	$ V ' \in G_ { p ' } ( V ) $
v prime is equivalent to P zero v double prime	$ v^\prime \equiv_ { P^0 } v^ { \prime\prime } $
v sine i is less than two.	$ v\sin i < 2 $
V squared times the absolute value of the gradient of f squared is less than or equal to gamma squared.	$ V^2|\nabla^b f|^2 \leq \gamma^2 $
V sub 1.	$ V_ { 1 } $
v sub 6 equals 1.	$ v_6 = 1 $
V sub a subset V.	$ V_a \subset V $
V sub alpha open parenthesis lambda, kappa close parenthesis	$ V_ { \alpha } ( \lambda , \kappa ) , $
v sub B greater than zero.	$ v_B > 0 $
V sub c equals 50 micro.	$ V_c=50\ , \mu $
V sub c q.	$ V_ { cq } $
v sub epsilon greater than or equal to zero.	$ v_\epsilon\geq0 $
v sub ext 1 times v sub ext 2.	$ v_ { ext,1 } v_ { ext,2 } $
V sub j.	$ V_ { \ { j\ } } $
v sub L y sub L	$ v_Ly_L $
v sub n superscript f	$ v_n^f $
V sub plus or minus is approximately plus or minus 0.5c.	$ V_ { \pm } \sim\pm 0.5c $
V sub r, open parenthesis, x sub r sub y, close parenthesis.	$ V_r ( x_ { ry } ) $
V sub rho comma r equals 0.35 minus 0.95	$ V_ { \rho , r } = 0.35-0.95 $
v sub T	$ v_ { \text { T } } $
v sub t equals y.	$ v_t = y $
v sub theta open parenthesis hat s close parenthesis	$ v_\theta ( \hat { s } ) $
V sub x of p	$ V_x ( p ) $
v sub Y of mu equals zero	$ v_Y ( \mu ) =0 $
V sub Z equals mu sub B g B	$ V_Z=\mu_BgB $
V, E equals open brace A, B, C close brace	$ ( V , E=\ { A , B , C\ } ) $
v, ell, belong to the set of integers	$ v , \ell\in\mathbb { Z } $
Vector a sub 2 equals open parenthesis one-half, square root of three divided by two, close parenthesis times a.	$ \vec { a } _2= ( 1/2 , \sqrt { 3 } /2 ) a $
vector m to the power of 1.	$ \vec m^1 $
Vector p sub hide comma i of t.	$ \vec { p } _ { hide , i } ( t ) $
vector R sub 1	$ \vec { R } _1 $
Vector v belongs to the set of open parenthesis V prime close parenthesis raised to the power of k.	$ \vec v \in ( V ' ) ^ { k } $
Vector v equals open parenthesis, v sub 1, ellipsis, v sub k, close parenthesis.	$ \vec { v } = ( v_1 , \dots , v_k ) $
vector v sub H	$ \vec { v } _H $
vector x sub i.	$ { \vec x } _i $
Vector xi arrow vector x.	$ \vec \xi \to \vec x $
Vector z plus N to the power of negative one times vector J.	$ \vec { z } +N^ { -1 } \vec { J } $
W bar belongs to L of H	$ \overline { W } \in\L ( \H ) $
w belongs to the set of N sub G of v minus the set containing x and y.	$ w\in N_G ( v ) \setminus \ { x , y\ } $
w dagger M i v	$ w^\dagger M^i v $
w equals 0.8.	$ w=0.8 $
w is defined as u minus u prime.	$ w : =u-u ' $
w prime belongs to the set of L sub o cubed.	$ w ' \in \mathcal { L } _o^ { cube } $
W raised to the power of k, sub i eta, equals Z sub I sub i.	$ W^ { ( k ) } _i ( \eta ) = Z_ { I_i } $
W raised to the power of one, infinity, of the interval from zero to T.	$ W^ { 1 , \infty } ( ( 0 , T ) ) $
w squared of z equals negative R of z times A of z.	$ w^ { 2 } ( z ) =-R ( z ) A ( z ) $
W sub 0 superscript k comma p open parenthesis K close parenthesis.	$ W_0^ { k , p } ( K ) $
w sub 1 is less than or equal to w sub 1 is less than or equal to w sub 2	$ w_1 \leq w \leq w_2 $
W sub 1, dot dot dot, W sub D q.	$ W_D^1 , \cdots , W_D^q $
w sub 2 open parenthesis T R sub 4 close parenthesis	$ w_2 ( TM_4 ) $
w sub 3 open parenthesis 0 close parenthesis equals one-half	$ w_3 ( 0 ) =\frac { 1 } { 2 } $
w sub area.	$ w_ { area } $
W sub G of T equals S sub 3 equals	$ W_G ( T ) = S_3= $
w sub i open parenthesis e comma f close parenthesis	$ w_i ( e , f ) $
w sub n equals a to the power of k sub 2.	$ w_n=a^ { k_2 } $
w sub p equals 1, w sub o equals 5, w sub c equals 0.4.	$ w_p=1 , w_o=5 , w_c=0.4 $
W sub r, K sub r, I sub r, M sub r	$ ( W_r , K_r , I_r , M_r ) $
w sub u, i superscript D belongs to the set of real numbers superscript V superscript D.	$ w_ { u , i } ^D\in \mathbb { R } ^ { V^D } $
W tau goes to infinity	$ \mathcal { W } \tau \to \infty $
W transpose times h sub i.	$ W^ { T } h_i $
wide hat H of z	$ \widehat H ( z ) $
wide hat Omega of k	$ \widehat { \Omega } ( k ) $
wide hat u raised to the power of k	$ \widehat { u } ^k $
Widetilde T equals widetilde xi equals widetilde gamma prime.	$ \widetilde T=\widetilde\xi=\widetilde\gamma ' $
X bar sub i equals X bar sub j.	$ \overline { X } _i = \overline { X_j } $
x belongs to A minus	$ x\in A^ { - } $
x belongs to the open interval from negative infinity to x sub 1 times tau sub 1.	$ x\in ( -\infty , x_1 ( \tau_1 ) ) $
x belongs to the set containing T.	$ x \in [ T ] $
x belongs to the set of F raised to the power of n.	$ x \in \mathbb { F } ^n $
x belongs to X set minus set containing y.	$ x \in X \setminus \ { y\ } $
x comma y.	$ \ { x_ { } , y_ { } \ } $
x equals a sub 3 equals t.	$ x=a_3=t $
x equals one divided by the quantity one plus r times a to the power of negative three.	$ x=1/ ( 1+ra^ { -3 } ) $
x equals the ordered pair consisting of a and b, which belongs to the set U.	$ x= ( a , b ) \in U $
x less than or equal to the derivative of y.	$ x\leq ' y $
X of omega, t models phi sub 1.	$ X ( \omega ) , t\models\phi_1 $
x of rho of t	$ x ( \rho ( t ) ) $
X raised to the power of 1, evaluated at s sub 1.	$ X^1 [ s_1 ] $
x sub 0 much greater than E over m sub i squared	$ x_ { 0 } \gg E/m_ { i } ^ { 2 } $
x sub 1 belongs to V of H sub v sub 1	$ x_1\in V ( H_ { vu_1 } ) $
X sub 1 equals 3.	$ X_1 = 3 $
x sub 1 equals open parenthesis x sub 2 close parenthesis to the power of Omega.	$ x_1= ( x_ { 2 } ) ^\Omega $
x sub 1, x sub 2 belongs to the set of real numbers.	$ x_ { 1 } , x_ { 2 } \in \mathbb { R } $
x sub 3 is not in the set containing x sub 1 and x sub 2.	$ x_3\notin\ { x_1 , x_2\ } $
x sub beta equals x sub gamma	$ x_ { \beta } = x_ { \gamma } $
x sub c comma 1	$ [ x_c , 1 ] $
X sub ell to the power of n	$ X_\ell^n $
x sub Equiv	$ [ x ] _\Equiv $
x sub f m	$ x_ { fm } $
X sub gamma	$ \ { X_ { \gamma } \ } $
x sub j of zero is greater than zero.	$ x_j ( 0 ) > 0 $
x sub j plus 1	$ x_ { j+1 } $
X sub l, Y sub l	$ X_l , Y_l $
X sub one comma i equals c sub one z sub i plus d sub one	$ X_ { 1 , i } =c_1z_i+d_1 $
x sub one-third.	$ x_ { 1/3 } $
X sub Q, Q	$ ( X_Q , Q ) $
x sub tilde p equals zero	$ x_ { \tilde { p } } = 0 $
X sub xi dot.	$ X_\cdot^\xi $
X sub-min i is greater than c sub-i minus 1.	$ X_ { \min , i } > c_i -1 $
X to the power of h equals X to the power of h sub t, sub t greater than or equal to zero.	$ X^h= ( X^h_t ) _ { t\geq 0 } $
x to the power of out t belongs to phi to the power of out t.	$ x^ { out } _t \in \phi^ { out } _t $
x to the power of t belongs to the interval from tilde a to 1, raised to the power of N.	$ x^t\in [ \tilde { a } , 1 ] ^N $
x y equals plus or minus one.	$ xy=\pm1 $
x, d sub q, d sub q plus 1, dot dot dot, d sub l	$ x , d_q , d_ { q+1 } , \dots , d_l $
x, f of x belong to the set of real numbers.	$ x , f ( x ) \in \mathbb { R } $
X, g	$ ( X , g ) $
x, y belong to G sub ell.	$ x , y \in G_ { \ell } $
x, y belong to V sub S.	$ x , y\in V_S $
x, y belongs to S sub 1 to the power of c.	$ x , y\in S_1^c $
x, y in E, x not equal to y.	$ x , y \in E , x\ \neq y $
x, y, z belong to the set of pi hat of Sigma.	$ x , y , z\in \widehat\pi ( \Sigma ) $
Xi is distributed according to the normal distribution with mean 0 and standard deviation 1.	$ \xi \sim \mathcal { N } ( 0,1 ) $
Xi sub n z goes to z.	$ \xi_n z \to z $
Xi sub zero star not equal to zero.	$ \xi_0^ * \neq0 $
Xi to the power of i of t equals zero.	$ \xi^ { i } ( t ) = 0 $
Xi, colon, X, to, X, star, H.	$ \xi \colon X \to X \ast H $
y belongs to L sub t.	$ y \in L_t $
y belongs to the interval from 0 to Y.	$ y \in [ 0 , Y ) $
Y belongs to the set of G perpendicular.	$ Y\in \mathcal { G } ^\perp $
Y equals G of E divided by K.	$ Y : = G ( E ) /K $
Y is distributed as normal with mean zero and variance V.	$ Y\sim N ( 0 , V ) $
y is greater than or approximately equal to 1.	$ y \gtrsim 1 $
y of T equals I times the indicator function of T greater than or equal to t.	$ y ( T ) = I\ { T \geq t\ } $
y of t, y sub 0, u, belongs to Omega	$ y ( t ; y_0 , u ) \in \Omega $
y sub 0 equals z sub 0 equals 0.	$ y_0 = z_0 = 0. $
y sub 1 open parenthesis 0 close parenthesis equals 1.8	$ y_1 ( 0 ) = 1.8 $
y sub 1, y sub 2, ellipsis, y sub k.	$ ( y_1 , y_2 , \ldots , y_k ) $
Y sub 23 to the power of 4 prime.	$ Y_ { 23 } ^ { 4 ' } $
y sub 3	$ p , q , s , \beta , y_1 , y_2 , y_3 $
y sub d equals m.	$ y_d=m $
Y sub i comma t.	$ Y_ { i , t } $
Y sub i, comma, X sub i.	$ ( Y_ { i } , X_ { i } ) $
y sub i, raised to the power of N sub i equals 1.	$ \ { { y_i } \ } ^N_ { i=1 } $
y sub k	$ y_ { k } , $
y sub max	$ y_ { max } $
Y sub n equals X sub n minus X determinant sub n.	$ Y_n = X_n - X^ { \det } _n $
y sub P sub b equals b	$ y_ { P_b } =b $
Y sub S equals 2Y sub 0 times the quantity 1 plus delta.	$ Y_S = 2Y_0 ( 1+\delta ) $
y sub v equals five halves	$ y_v=5/2 $
y to the power of c belongs to the set of real numbers raised to the power of n plus m.	$ y^ { c } \in \mathbb { R } ^ { ( n+m ) } $
Y to the power of L prime	$ Y^ { L ' } $
z arrow a	$ z \to a $
z belongs to A sub k.	$ z\in A_k $
z belongs to G sub min.	$ z \in G_ { \min } $
z belongs to the complement of the ball centered at x with radius 2r.	$ z \in B ( x,2r ) ^c $
z belongs to the set of H.	$ z\in \mathcal { H } $
z divided by 2 is less than P, which is less than z.	$ \frac { z } { 2 } < P < z $
z equals 7.48.	$ z=7.48 $
z equals 8 point 6 7 7	$ z=8.679 $
z equals negative u sub j.	$ z=-u_j $
Z equals X direct sum infinity double-struck capital R.	$ Z=X \oplus_\infty \mathbb { R } $
z greater than or equal to z-bar.	$ z\geq \bar { z } $
z is defined as x minus i times y.	$ z\equiv x-iy $
z raised to the power of d equals K mu.	$ z^d=K\mu $
z raised to the power of s, belongs to the set of real numbers raised to the power of T.	$ z^s \in \mathbb { R } ^T $
Z sub 1 sub 1 superscript 1	$ Z ( 1 ) _1^1 $
Z sub 1, dot dot dot, Z sub n	$ \ { Z_1 , ... Z_n\ } $
Z sub e sub zero	$ Z_ { e_0 } $
z sub g plus L.	$ z_g+L $
z sub Hef equals 2.6 minus 3.2.	$ z_ { Hef } = 2.6 - 3.2 $
Z sub i to zero.	$ Z_i\to 0 $
z sub j belongs to the set containing 0 and 1.	$ z_j \in \ { 0,1\ } $
Z sub k, S cubed	$ Z_k [ S^3 ] $
Z sub L, Z sub R	$ Z_L , Z_R $
z sub n of t equals the commutator of z sub n superscript zero of t and z sub n superscript one of t.	$ z_n ( t ) = [ z_n^0 ( t ) , z_n^1 ( t ) ] $
z sub t equals b times G to the power of t plus S sub t.	$ z_t=bG^t+S_t $
Zero equals the determinant of t times the identity matrix minus C sub n, evaluated at t equals zero.	$ 0=\det ( t\cdot I-C_ { n } ) |_ { t=0 } $
zero given eleven	$ 0|11 $
Zero is less than i, which is less than j, which is less than k, which is less than m plus one.	$ 0 < i < j < k < m+1 $
Zero is less than omega which is less than two times delta.	$ 0 < \omega < 2\Delta $
Zero is less than one minus the reciprocal of C sub 1 raised to the power of negative one, and q is less than one.	$ 0 < 1-C_1^ { -1 } \leq q < 1 $
Zero is less than or equal to e sub i, which is less than i.	$ 0\leq e_i < i $
Zero is less than or equal to j, which is less than k, which is less than n.	$ 0 \leq j < k < n $
Zero is less than or equal to k, which is less than or equal to m sub 2 minus m sub 1 minus 1.	$ 0\leq k\leq m_2-m_1-1 $
Zero is less than or equal to lambda, which is less than or equal to two.	$ 0\leq \lambda \leq 2 $
Zero is less than q minus is less than q plus.	$ 0 < q_- < q_+ $
Zero is less than rho raised to the power of two divided by alpha, which is less than T.	$ 0 < \rho^ { 2/\alpha } < T $
Zero is less than T sub alpha much less than J.	$ 0 < T_\alpha\ll J $
Zero is less than t, which is less than t sub 3.	$ 0 < t < t_3 $
Zero is less than theta squared which is less than two times sigma.	$ 0 < \theta^2 < 2\sigma $
Zero less than or equal to s, less than t, less than or equal to one.	$ 0 \leq s < t\leq 1 $
Zero less than or equal to the script E of l, less than or equal to one.	$ 0 \leq \mathcal { E } ( l ) \leq 1 $
Zero less than s, less than r, less than r sub p.	$ 0 < s < r < r_p $
zero point eight two minus point eight five.	$ 0.82-0.85 $
Zero point eight two three to the power of plus zero point zero one four, subscript minus zero point zero nine.	$ 0.823^ { +0.014 } _ { -0.009 } $
zero point four one six to the power of plus or minus zero point zero zero four.	$ 0.416^ { \pm .004 } $
Zero point nine nine four plus or minus zero point zero zero six six.	$ { 0.9964\pm0.0060 } $
zero point nine two one plus or minus zero point zero nine two.	$ 0.921\pm0.092 $
zero point three m divided by s.	$ 0.3 m/s $
zero point three times zero point four nine five.	$ 0.3 ( 0.459 ) $
Zero point zero one nine nine nine.	$ 0.01999 $
zero point zero three seven seven.	$ 0.0377 $
zero point zero zero zero eight three s to the power of negative one.	$ 0.00083 s^ { -1 } $
zero, open parenthesis, N plus one, close parenthesis.	$ [ 0 , ( N+1 ) ] $
Zeta naught times Z equals negative 2 times the partial derivative with respect to Z of Zeta naught.	$ Z\eta_0 = -2\partial_Z\eta_0 $
Zeta sub alpha equals three-fourths.	$ \zeta_\alpha=\frac { 3 } { 4 } $
zeta sub one.	$ \zeta_ { 1 } $
zeta to the power of alpha.	$ \zeta^ { \alpha } $
zeta to the power of d	$ \zeta^d $
ZP sub limit.	$ ZP_ { lim } $
ξ prime equals the derivative of ξ with respect to φ.	$ \xi'=\frac { d\xi } { d\phi } $

## Sheet: LongFormulas
	A subscript X Y of V, colon, phi subscript X Y maps to phi subscript VW.	$ A_ { ( XY ) ( VW ) } : \phi_ { XY } \mapsto\phi_ { VW } $
	a subset of m minus pi is a subset of a subset of	$ , and the conditioning set of the m-child is a subset of $
	a theta sub i raised to the power of 0 equals a hat theta sub i minus 1	$ a ( \theta_ { i } ) ^ { ( 0 ) } = \hat { a } ( \theta_ { i-1 } ) $
	A tilde x sub N bar t plus B tilde u sub N bar t minus r belongs to hat X sub f.	$ A\tilde { x } _ { N|t } +B\tilde { u } _ { N|t } -r\in \hat { X } _f $
	a times q equals i times epsilon of p sub 1, p sub 2, q, a, divided by m sub 1 times m sub 2 times sigma times v.	$ a\cdot q=i\frac { \epsilon ( p_1 , p_2 , q , a ) } { m_1m_2\sigma v } $
	A to the power of f of x equals the partial derivative of f to the power of y of x with respect to x.	$ A^ { f } ( x ) = \frac { \partial f^ { y } ( x ) } { \partial x } $
	A to the power of m equals open parenthesis a sub i j close parenthesis sub i comma j equals 1 to m.	$ A^ { ( m ) } = ( a_ { ij } ) _ { i , j=1 .. m } $
	A to the power of n sub i sub f of n sub i plus 1, not in the script L to the power of n sub i sub i.	$ A^ { n_i } _ { f ( n_i ) + 1 } \not \in \mathcal { L } ^ { n_i } _i $
	A to the power of n sub k, 0, U to the power of n sub k, 0, A to the power of 0 sub, and U to the power of 0 sub k.	$ A^n_ { k,0 } , \ U^n_ { k,0 } , \ A^0_ , \text { and } U^0_k $
	a to the power of n times b to the power of n times c to the power of n.	$ \mathtt { a } ^n\mathtt { b } ^n\mathtt { c } ^n $
	A to the power of tau n equals f of X to the power of tau n, semicolon W to the power of tau minus 1 sub head.	$ A^\tau_n=f ( X^\tau_n ; W^ { \tau-1 } _ { head } ) $
	A train squared sub 2 is less than or equal to A train squared sub 3.	$ \mathcal { A } ^ { train } _2\preceq\mathcal { A } ^ { train } _3 $
	Absolute value of beta minus gamma minus theta plus delta, divided by 2.	$ \frac { |\beta - \gamma - \theta + \delta| } { 2 } $
	Absolute value of beta transpose times xi is less than or equal to R sub 0 inverse times R, which is less than 1.	$ |\beta^ { \top } \xi| \leq R_ { 0 } ^ { -1 } R < 1 $
	Absolute value of C sub i belongs to 2 to the power of O of log squared over delta.	$ |\mathcal { C } _i|\in 2^ { \mathcal { O } ( \log^2 ( 1/\delta ) ) } $
	Absolute value of d of 0, gamma sub n of t sub 0, minus d of 0, alpha of t sub 0, is less than or equal to D plus 1.	$ |d ( 0 , \gamma_n ( t_0 ) ) -d ( 0 , \alpha ( t_0 ) ) |\leq D+1 $
	Absolute value of E of G is equivalent to ell of the absolute value of V of G minus 1, plus d is equivalent to d.	$ |E ( G ) |\equiv \ell ( |V ( G ) |-1 ) +d \equiv d $
	Absolute value of f of lambda is greater than absolute value of g of lambda.	$ \vert f ( \lambda ) \vert > \vert g ( \lambda ) \vert. $
	Absolute value of F sub t equals 2 to the power of q to the power of O of 1.	$ |\mathcal { F } _t|=2^ { q^ { \mathcal { O } ( 1 ) } } $
	Absolute value of G sub a divided by 2 pi is approximately 3.5 Hz.	$ \vert\mathcal { G } _ { a } \vert/2\pi\approx3.5\ , \text { THz } $
	Absolute value of G to the power of negative one, multiplied by the sum over x in G of C sub one minus alpha of x.	$ |\mathcal { G } |^ { -1 } \sum_ { x\in\mathcal { G } } C_ { 1-\alpha } ( x ) $
	Absolute value of Gamma equals the sum over gamma in Gamma of absolute value of gamma.	$ ||\Gamma|| = \sum_ { \gamma \in \Gamma } ||\gamma|| $
	Absolute value of gamma intersection alpha equals absolute value of gamma intersection beta equals infinity.	$ |\gamma \cap \alpha| = |\gamma \cap \beta | = \infty $
	Absolute value of gamma sub VV, l, on squared.	$ |\gamma_ { \text { VV } , l , \text { on } } |^2 $
	Absolute value of K of x, E sub j, equals alpha sub x, j, K of x, E sub j.	$ |K ( x , E_ { j } ) | = \alpha_ { x , j } K ( x , E_ { j } ) $
	Absolute value of k sub i double prime, comma, m sub i double prime, right angle bracket.	$ |k_ { i } ^ { \prime\prime } , m_ { i } ^ { \prime\prime } \rangle $
	Absolute value of log q of x, multiplied by log, absolute value of log q of x, equals little o of log x.	$ |\log q ( x ) | \log |\log q ( x ) |= o ( \log x ) $
	Absolute value of M plus fraction A squared over 4 times the quantity 1 plus eta squared, absolute value equals 3.	$ \mid M + \frac { A^2 } { 4 } ( 1+\eta^2 ) \mid = 3. $
	Absolute value of m sub d of z comma t minus m sub d of E plus or minus sub d of t comma t, as absolute value of w.	$ |m_d ( z ; t ) -m_d ( E^\pm_ { d } ( t ) ; t ) |\asymp \sqrt { |w| } $
	Absolute value of m sub u sub n, v sub n minus m sub x, y, greater than or equal to alpha.	$ | m_ { u_n , v_n } - m_ { x , y } | \geq \alpha $
	Absolute value of N of x minus tilde N of x, less than or equal to epsilon N of x.	$ |N ( x ) - \tilde { N } ( x ) | \leq \epsilon N ( x ) $
	Absolute value of Nabla sub mu one through mu five log f of Y given W semicolon bar psi comma hat gamma star.	$ |\nabla_ { \mu_1 \dots \mu_5 } \log f ( Y|W ; \bar \psi , \hat \gamma^ * ) | $
	Absolute value of phi sub i of z sub 0 plus absolute value of phi sub i plus 1 of z sub 0 is not equal to 0.	$ |\varphi_ { i } ( z_0 ) | + |\varphi_ { i+1 } ( z_0 ) | \neq 0 $
	Absolute value of phi sub k transpose times theta tilde bar sub k, less than or equal to DM.	$ |\phi_ { k } ^ { \top } \tilde { \bar { \theta } } _ { k } |\leq DM $
	Absolute value of pi sub n of H equals absolute value of the composition of pi bar and pi sub n of H.	$ |\pi_n ( H ) |=|\overline { \pi } \circ\pi_n ( H ) | $
	Absolute value of Q sub s equals ell sub s less than or equal to 65 r cubed.	$ |\mathcal { Q } _ { s } |= : \ell_ { s } \leq 65r^ { 3 } $
	Absolute value of rho minus rho sub z is greater than or equal to rho epsilon plus.	$ \vert \rho - \rho_z \vert \geq \rho \varepsilon_+ $
	Absolute value of S sub i set minus script A sub i is less than or equal to 0.011 times absolute value of S sub i.	$ | S_i \setminus \mathcal { A } _i | \leq 0.011 |S_i| $
	Absolute value of S, equals k, absolute value of R of S, equals absolute value of S sub 0.	$ \ { S\subset [ 1 , -1 ] \ , |\ , |S|=k , |R ( S ) |=|S_ { 0 } |\ } $
	Absolute value of sigma of x, absolute value of sigma sub tau of x, less than or equal to one over tau.	$ |\sigma ( x ) | , |\sigma_\tau ( x ) | \leq 1/\tau $
	Absolute value of the derivative of Delta D with respect to D is less than or equal to delta.	$ |\mathcal { D } \Delta \mathbb { D } |\leq \delta , $
	Absolute value of the derivative of vector q is less than or equal to the derivative of vector q sub max.	$ |\dot { \vec { q } } |\ : \leq\dot { \vec { q } } _ { max } $
	Absolute value of the difference between the hat psi sub n and the hat psi sub k.	$ |\widehat { \psi } _ { n } - \widehat { \psi } _ { k } | $
	Absolute value of the difference between the operator L of T and theta minus the operator L of S and theta.	$ |\mathcal { L } ( T ; \theta ) - \mathcal { L } ( S ; \theta ) | $
	Absolute value of the gradient of the energy E sub i with respect to mu sub i of w.	$ ||\nabla \mathcal { E } _ { i } ( \mu_ { i } ( w ) ) || $
	Absolute value of the imaginary part of lambda equals absolute value of the real part of lambda times little o of 1.	$ \vert \Im ( \lambda ) \vert = \vert \Re ( \lambda ) \vert o ( 1 ) $
	Absolute value of the inner product of the commutator of vector u sub j l and vector u sub i k.	$ |\langle \vec { u } _ { jl } , \vec { u } _ { ik } \rangle| $
	Absolute value of the overline of u prime f equals absolute value of the overline of u prime u.	$ |\overline { u ' f } | = |\overline { u ' u } | $
	Absolute value of the partial derivative of F sub m with respect to x sub i, less than or equal to k.	$ |\frac { \partial F_m } { \partial x_i } |\leq k $
	Absolute value of the partial derivative of psi with respect to y, evaluated at I and J.	$ | { \partial\psi } / { \partial y } |_ { I , J } $
	Absolute value of the quantity f tilde of a plus one minus g tilde of a plus one, less than or equal to two.	$ |\tilde { f } ( a { + } 1 ) -\tilde { g } ( a { + } 1 ) | \leq 2 $
	Absolute value of the set I equals absolute value of the set K plus, approximately equal to 4 times n squared.	$ |\mathcal { I } |=|\mathcal { K } _+|\approx 4n^2 $
	Absolute value of the tilde S backslash S star union S star, less than or equal to the quantity K plus 1, times s star.	$ |\tilde S\backslash S_\star\cup S_\star|\leq ( K+1 ) s_\star $
	Absolute value of the trace of the difference between rho sub R and rho sub MC is less than or equal to 2.	$ |\text { tr } [ \rho_R - \rho_ { \text { mc } } ] |\leq 2 $
	Absolute value of the trace of XY is less than or equal to the sum over i of sigma i of X times sigma i of Y.	$ |\text { tr } ( XY ) |\leq \sum_i \sigma_i ( X ) \sigma_i ( Y ) $
	Absolute value of theta of t minus theta sub zero of t, less than M of n times h to the power of negative one-half.	$ \mid \theta ( t ) - \theta_0 ( t ) \mid < M ( nh ) ^ { -1/2 } $
	Absolute value of u of t comma x is less than or equal to the norm of Omega of t comma dot, in L infinity.	$ |u ( t , x ) |\leq \|\Omega ( t , \cdot ) \|_ { L^ { \infty } } $
	Absolute value of u sub k sub n of f times chi sub r of f raised to the power of l sub n is less than one-fifth.	$ |u_ { k_n } ( f ) \chi_ { r ( f ) } ^ { l_n } | < \frac { 1 } { 5 } $
	Absolute value of u subscript x, absolute value of u subscript y, less than d divided by 2.	$ | { u } _ { x } | , | { u } _ { y } | < \frac { d } { 2 } $
	Absolute value of vector z sub 1 minus vector z sub 2 equals 2 R divided by beta times sine of theta beta divided by 2.	$ |\vec { z_1 } -\vec { z_2 } |=2R/\beta \sin ( { \theta \beta/2 } ) $
	Absolute value of W set minus S is less than absolute value of S sub 1 plus eta squared over 2 times n sub H.	$ |W\setminus S| < |S_1|+ \frac { \eta^2 } { 2 } n_H $
	Absolute value of x minus log a is less than or equal to alpha to the power of negative ten over twenty-one.	$ |x-\log a|\leq \alpha^ { - \frac { 10 } { 21 } } $
	Absolute value of x prime minus x hat is greater than or equal to the diameter of J prime divided by 3.	$ |x^\prime - \hat { x } | \geq \text { diam } J^\prime/3 $
	Absolute value of y of x tilde minus y of x is less than or equal to M.	$ \vert y ( \tilde { x } ) - y ( x ) \vert \leq M $
	Absolute value of Y sub h, i superscript t is greater than or equal to 2.	$ \vert\mathcal { Y } _ { h , i } ^ { ( t ) } \vert\geq 2 $
	Absolute value of Z equals the cardinality of the intersection of A and the set containing the fraction n divided by 2.	$ |Z|=\left|A\cap\left [ \frac { n } { 2 } \right ] \right| $
	Absolute value of zeta of one over absolute value of Omega bar, close parenthesis, much greater than a bar.	$ | \zeta ( 1/|\bar { \Omega } | ) | \gg \bar { a } $
	AccVer of A sub phi, v, w sub v equals 1.	$ \mathsf { AccVer } ( A_ { \phi } , v , w_ { v } ) =1 $
	Agree of P sub i, P sub j is a subset of Agree of P sub i, P sub k.	$ Agree ( P_ { i } , P_ { j } ) \subseteq Agree ( P_ { i } , P_ { k } ) $
	Aleph of gamma is defined as alpha bar sub s times chi of gamma.	$ \aleph ( \gamma ) \equiv \bar { \alpha } _s\chi ( \gamma ) $
	aleph sub zero is less than or equal to kappa equals c times f of kappa backslash lambda equals c times f of lambda.	$ \aleph _0\leq \kappa =cf ( \kappa ) \vartriangleleft \lambda =cf ( \lambda ) $
	Alpha 4 is defined as one minus alpha times the quantity epsilon minus gamma, which is greater than zero.	$ \alpha_4 : =1-\alpha ( \varepsilon-\gamma ) > 0 $
	alpha bar sub s, open parenthesis, lambda bar squared, close parenthesis.	$ \overline { \alpha } _s ( \bar { \Lambda } ^2 ) $
	Alpha bar sub Xi, alpha bar sub Lambda.	$ \bar { \alpha } _ { \Xi } \bar { \alpha } _ { \Lambda } $
	Alpha belongs to C infinity of S to the power of m of r.	$ \alpha\in C^\infty\left ( \mathbb { S } ^m ( r ) \right ) $
	Alpha belongs to H star of X, gamma; Z.	$ \alpha\in H_ * \left ( X , \gamma ; \mathbb { Z } \right ) $
	Alpha belongs to the interval from z minus 1 divided by w sub j, to z divided by w sub j, inclusive.	$ \alpha\in \left ( \frac { z-1 } { w_j } , \frac { z } { w_j } \right ] $
	Alpha belongs to the set of 0, 2 pi over 14, dot dot dot, 2 pi.	$ \alpha\in\ { 0 , \frac { 2\pi } { 14 } , \cdots2\pi\ } $
	Alpha belongs to the set of 0.5, lambda belongs to the set of 0.5.	$ \alpha \in \ { 0.5 \ } , ~\lambda \in \ { 0.5 \ } $
	Alpha beta divided by gamma squared is greater than three halves.	$ \frac { \alpha\beta } { \gamma^2 } > \frac { 3 } { 2 } $
	Alpha beta, a plus b, alpha epsilon sub 1 plus beta epsilon sub 2.	$ ( \alpha\beta , a+b , \alpha\epsilon_1+\beta\epsilon_2 ) $
	Alpha c l of G sub 0 is a subset of G.	$ \alpha cl ( \mathcal { G } _0 ) \subseteq \mathcal { G } $
	Alpha c sub j minus lambda sub E sub open parenthesis S union j close parenthesis greater than or equal to zero.	$ \alpha c_j - \lambda_ { E_ { ( S\cup\ { j\ } ) } } \geq 0 $
	Alpha equals 2, h equals 0.09, beta equals 20, gamma equals 20.	$ \alpha = 2 , h = 0.09 , \beta = 20 , \gamma = 20 $
	Alpha equals alpha sub 1, ellipsis, alpha sub 5k.	$ Alpha=\ { \alpha_1 , \ldots , \alpha_ { 5k } \ } $
	Alpha equals alpha sub k j, i d z to the power of j wedge d z to the power of k.	$ \alpha = \alpha_ { \bar kj } \ , idz^j\wedge d\bar z^k $
	Alpha equals beta times the quantity r sub E divided by beta sub ph times the quantity r sub E, approximately 1.14.	$ \alpha = \beta ( r_E ) /\beta_\text { ph } ( r_E ) \simeq 1.14 $
	Alpha equals four pi times the quantity p parallel minus p perpendicular divided by B squared.	$ \alpha=\frac { 4\pi ( p_ { \parallel } -p_ { \perp } ) } { B^2 } $
	Alpha equals g of c to the power of s divided by p of c to the power of s plus c to the power of s.	$ \alpha = \frac { g ( c^s ) } { p ( c^s ) } +c^s $
	Alpha equals g star k sub F divided by pi v sub F squared.	$ \alpha=g^ { * } k_ { F } / ( \pi v_ { F } ^ { 2 } ) $
	Alpha equals gamma divided by two minus gamma, belonging to the open interval from zero to one.	$ \alpha = \frac { \gamma } { 2-\gamma } \in ( 0,1 ) $
	Alpha equals M inverse times a, beta equals M inverse times b, gamma equals M inverse times c.	$ \alpha=M^ { -1 } a , \beta=M^ { -1 } b , \gamma=M^ { -1 } c $
	Alpha equals negative 0.5, beta equals negative 1.5, gamma equals 1, delta equals 0.3.	$ \alpha=-0.5 , \beta= -1.5 , \gamma= 1 , \delta= 0.3 $
	Alpha equals one minus pi times the square root of three divided by two times two to the negative two b.	$ \alpha = 1 - \frac { \pi\sqrt { 3 } } { 2 } 2^ { -2b } $
	Alpha equals one, X equals empty set, a sub beta equals I sub beta of two square root of x.	$ \alpha=1 , X=\emptyset , a_\beta = I_\beta ( 2\sqrt { x } ) $
	Alpha equals open parenthesis alpha sub 1 comma ellipsis comma alpha sub M close parenthesis belongs to Lambda sub a.	$ \alpha = ( \alpha_1 , \ldots , \alpha_M ) \in\Lambda_a $
	Alpha equals open parenthesis alpha sub 1, dot dot dot, alpha n, close parenthesis.	$ \alpha = \left ( \alpha_1 , \dots , \alpha_n \right ) $
	Alpha equals open parenthesis alpha sub 1, ellipsis, alpha sub ell close parenthesis transpose.	$ \alpha = ( \alpha_1 , \ldots , \alpha_\ell ) ^T $
	Alpha equals open parenthesis alpha sub zero, alpha sub one, alpha sub two, dot dot dot, alpha sub n close parenthesis.	$ \alpha = ( \alpha_0 , \alpha_1 , \alpha_2 , \dots , \alpha_n ) $
	Alpha equals P of gamma A times k sub KA of alpha.	$ \alpha= P ( \gamma_A ) \mathfrak { k } _ { KA } ( \alpha ) $
	Alpha equals r, comma, t, comma, epsilon, comma, epsilon prime.	$ \alpha=r , \ , t , \ , \epsilon , \ , \epsilon ' $
	Alpha equals the limit as v approaches infinity of F sub v minus 1 divided by F sub v.	$ \alpha = \lim_ { v\to\infty } F_ { v-1 } /F_ { v } $
	Alpha equals the overline of f of alpha sub 2 times f of alpha sub 1.	$ \alpha = \overline { f ( \alpha_2 ) } \cdot f ( \alpha_1 ) $
	Alpha equals the square root of epsilon squared minus 4 times the quantity 1 plus epsilon times w squared.	$ \alpha = \sqrt { \epsilon^2 - 4 ( 1 + \epsilon ) w^2 } $
	Alpha equals the square root of one-half times the natural logarithm of two times T squared times k.	$ \alpha = \sqrt { \frac { 1 } { 2 } \ln ( 2T^2 k ) } $
	Alpha hat of M is defined as alpha of M raised to the power of negative one.	$ \hat { \alpha } [ M ] : = \alpha [ M ] ^ { -1 } $
	Alpha hat prime of w sub 1 is not equal to alpha hat prime of w sub 2.	$ \hat { \alpha } ' ( w_1 ) \neq \hat { \alpha } ' ( w_2 ) $
	Alpha is defined as alpha sub a equals 2 times the quantity sigma squared plus gamma squared.	$ \alpha \triangleq \alpha_a = 2 ( \sigma^2 + \gamma^2 ) $
	Alpha is defined as the change in Q sub nn divided by the change in Q sub pp.	$ \alpha \equiv \Delta Q_ { nn } /\Delta Q_ { pp } $
	Alpha is greater than or equal to the quantity m divided by p plus 1, all multiplied by 1.	$ \alpha \geq \left [ \frac { m } { p+1 } \right ] +1 $
	Alpha m m belongs to the open interval from 0 to the minimum of T over 2 and the conjugate of alpha.	$ \alpha_m \in ( 0 , \min\ { T/2 , \bar { \alpha } \ } ] $
	Alpha maps to psi of alpha times f circle phi sub alpha.	$ \alpha\mapsto\psi ( \alpha ) f\circ\varphi_\alpha $
	Alpha maps to T sub alpha equals negative partial x squared plus alpha V.	$ \alpha\longmapsto T_\alpha=-\partial_x^2+\alpha V $
	Alpha of A equals zero if and only if m of A equals zero.	$ \alpha ( A ) = 0 \ ( \Leftrightarrow m ( A ) = 0 ) $
	Alpha of Delta sub i, colon F sub 1 of Delta sub i, arrow F sub 2 of Delta sub i.	$ \alpha ( \Delta_i ) \colon F_1 ( \Delta_i ) \to F_2 ( \Delta_i ) $
	Alpha of eta equals open fraction g sub phi close fraction divided by 2 phi of eta.	$ \alpha ( \eta ) =\frac { g_\phi } { 2 } \phi ( \eta ) $
	Alpha of G equals beta of G equals theta of G equals alpha star of G.	$ \alpha ( G ) = \beta ( G ) = \vartheta ( G ) = \alpha^\star ( G ) $
	Alpha of kappa equals 64 times the natural logarithm of one divided by kappa.	$ \alpha ( \kappa ) = 64\ln\frac { 1 } { \kappa } $
	Alpha of n t plus 1 divided by 4, r. Alpha of n t minus n plus 1 divided by 4, r.	$ \alpha ( nt+1/4 , r ) , \alpha ( nt-n+1/4 , r ) $
	Alpha one squared p to alpha one squared.	$ \hat \alpha_1^2\overset { p } { \to } \alpha_1^2 $
	Alpha one, alpha two, beta two, belongs to the set B two.	$ ( \alpha_1 , \alpha_2 , \beta_2 ) \in \mathcal { B } _2 $
	Alpha one, alpha two, ellipsis, alpha d, belong to the set of complex numbers.	$ \alpha_1 , \alpha_2 , \ldots , \alpha_d \in \mathbb { C } $
	Alpha prime equals gamma sub zero, ellipsis, gamma sub ell equals beta prime.	$ \alpha'=\gamma_0 , \dots , \gamma_\ell = \beta ' $
	Alpha prime equals open parenthesis alpha sub 1, ellipsis, alpha sub j minus 1, close parenthesis.	$ \alpha'= ( \alpha_1 , \ldots , \alpha_ { j-1 } ) $
	Alpha prime tilde equals eta zero prime, dot dot dot, eta r prime equals beta prime tilde.	$ \tilde { \alpha } '=\eta_0 ' , \dots , \eta_r'=\tilde { \beta } ' $
	Alpha q n is congruent to alpha prime q n modulo Z k.	$ \alpha qn \equiv \alpha^\prime qn \ , \text { mod } \mathbb { Z } ^k $
	Alpha star of beta equals beta circle alpha inverse.	$ \alpha_ * ( \beta ) = \beta \circ \alpha^ { -1 } $
	Alpha sub 0, alpha sub 1, alpha sub 2 equals open parenthesis 0, 0, negative 1 close parenthesis.	$ ( \alpha_ { 0 } , \alpha_ { 1 } , \alpha_ { 2 } ) = ( 0,0 , -1 ) $
	Alpha sub 01 of t belongs to Lag of xi sub ell sub 01 of t.	$ \alpha_ { 01 } ( t ) \in Lag ( \xi_ { \ell_ { 01 } ( t ) } ) $
	Alpha sub 1 equals one divided by one plus z to the power of i times bar z sub i.	$ \alpha_ { 1 } =\frac { 1 } { 1+z^ { i } \bar { z } _ { i } } $
	Alpha sub 1 to the power of 1/4, alpha sub 2 to the power of 1/4, dot dot dot, alpha sub n sub s to the power of 1/4.	$ \alpha_1^ { 1/4 } \alpha_2^ { 1/4 } \cdots \alpha_ { n_s } ^ { 1/4 } $
	Alpha sub 13, alpha sub 22, alpha sub 52, epsilon sub 3.	$ \alpha_ { 13 } , \alpha_ { 22 } , \alpha_ { 52 } , \varepsilon_3 $
	Alpha sub B of theta sub E equals 0.5 equals 0.1113.	$ \alpha_ { \text { B } } ( \theta_E=0.5 ) = 0.113 $
	Alpha sub c superscript 1 is less than alpha is less than alpha sub c superscript 2.	$ \alpha_ { c } ^ { ( 1 ) } < \alpha < \alpha_ { c } ^ { ( 2 ) } $
	Alpha sub F prime, G equals alpha sub F, G sigma sub i.	$ \alpha_ { F ' , G } =\alpha_ { F , G } \sigma_i $
	Alpha sub f sub m circle dot dot dot circle alpha sub f sub 1 of x	$ \alpha_ { f_m } \circ\cdots\circ \alpha_ { f_1 } ( x ) $
	Alpha sub i equals tilde beta sub i to the power of p to the power of M minus m sub i, belonging to L.	$ \alpha_i=\tilde \beta_i^ { p^ { M-m_i } } \in L $
	Alpha sub i not equal to alpha sub j, f sub i not equal to f sub j, phi sub i not equal to phi sub j.	$ \alpha_i \neq \alpha_j , f_i \neq f_j , \varphi_i \neq \varphi_j $
	Alpha sub i, 2 divided by alpha sub i, 1 is greater than or equal to alpha sub i, 3 divided by alpha sub i, 1.	$ \alpha_ { i,2 } /\alpha_ { i,1 } \geq \alpha_ { i,3 } /\alpha_ { i,1 } $
	Alpha sub i, j, k. Beta sub i, j, k. Gamma sub i, j, k.	$ \alpha_ { i , j , k } , \beta_ { i , j , k } , \gamma_ { i , j , k } $
	Alpha sub infinity to the power of n sub s over 4 is approximately equal to E to the power of 1 over 12.	$ \alpha_ { \infty } ^ { n_s/4 } \approx E^ { 1/12 } $
	Alpha sub j of u equals phi sub x of alpha bar sub j of u comma 1.	$ \alpha_j ( u ) =\varphi_x ( \bar \alpha_j ( u ) ,1 ) $
	Alpha sub j omega sub i vee equals delta sub i comma j.	$ \alpha_j ( \omega_ { [ i ] } ^\vee ) = \delta_ { [ i ] , [ j ] } $
	Alpha sub j superscript k equals h-bar kappa sub j superscript k.	$ { \alpha } _ { j } ^ { k } =\arccos\kappa_ { j } ^ { k } $
	Alpha sub j, beta sub j, theta sub j belong to the set containing 0, plus or minus 1.	$ \alpha_j , \beta_j , \theta_j \in \ { 0 , \pm 1\ } $
	Alpha sub jk equals the average of A sub jk, subscript st.	$ \alpha_ { jk } = \langle A_ { jk } \rangle_ { st } $
	Alpha sub k equals one over the square root of k plus one times the minimum of gamma over 24L, one.	$ \alpha_k = \frac { 1 } { \sqrt { k+1 } } \min\ { \gamma/ ( 24L ) ,1 \ } $
	Alpha sub k equals the maximum of i times the fraction of rho sub k plus of i divided by minus of i.	$ \alpha_k = \max_i \frac { \rho_k^+ ( i ) } { mp ( i ) } $
	Alpha sub k plus one equals alpha sub u open parenthesis alpha sub k comma delta sub k comma theta close parenthesis.	$ \alpha_ { k + 1 } = \alpha_u ( \alpha_k , \Delta_k , \theta ) $
	Alpha sub l, colon, mathbb R to the power of n sub l, right arrow, mathbb R to the power of n sub l.	$ \alpha_l : \mathbb { R } ^ { n_l } \rightarrow \mathbb { R } ^ { n_ { l } } $
	Alpha sub less than or equal to k equals alpha sub less than k plus one equals alpha sub zero dot dot dot alpha sub k.	$ \alpha_ { \leq k } = \alpha_ { < k+1 } = \alpha_0 \dots \alpha_k $
	Alpha sub n sub j belongs to C to the power of alpha sub n sub j of W.	$ \alpha_ { n_ { j } } \in C^ { \alpha_ { n_ { j } } } ( \mathcal { W } ) $
	Alpha sub n, beta sub m, gamma sub q, d, lambda sub q, d, r.	$ \alpha_n , \beta_m , \gamma_ { q , d } , \lambda_ { q , d , r } $
	Alpha sub one comma two of t is equivalent to omega sub one comma two t plus phi sub one comma two.	$ \alpha_ { 1,2 } ( t ) ~\equiv~\omega_ { 1,2 } t +\phi_ { 1,2 } $
	Alpha sub phi of a times z equals a times alpha sub phi of z.	$ \alpha_\phi ( a { \cdot } z ) = a { \cdot } \alpha_\phi ( z ) $
	Alpha sub pi of r, phi equals Phi sub b of r, phi plus Phi sub f of r, phi.	$ \alpha_\pi ( r , \varphi ) =\Phi_b ( r , \varphi ) +\Phi_f ( r , \varphi ) $
	Alpha sub r belongs to the set of C of I, where r belongs to the set of natural numbers.	$ \alpha_r \in \mathcal { C } ( I ) , \ r \in \mathbb { N } $
	Alpha sub r, beta sub r, alpha sub perpendicular, beta sub perpendicular.	$ \alpha_r , \beta_r , \alpha_\perp , \beta_\perp $
	Alpha sub s of M sub Z squared equals 0.1227 plus 0.0117 plus 0.0016 sub negative 0.0132 minus 0.0016.	$ \alpha_s ( M_Z^2 ) =0.1227^ { +0.0117+0.0016 } _ { -0.0132-0.0016 } $
	Alpha sub s superscript r dot open parenthesis mu sub zero close parenthesis.	$ \alpha_ { s } ^ { ( \text { thr . } ) } ( \mu_ { 0 } ) $
	Alpha sub t comma m belongs to the set containing 0.1, 0.275, 0.45, 0.625, and 0.8.	$ \alpha_ { t , m } \in \ { 0.1 , 0.275 , 0.45 , 0.625 , 0.8\ } $
	Alpha sub x comma 1 equals the column vector 0, 0, negative 0.5, 1.0 transposed.	$ \alpha_ { x , 1 } = [ 0 , 0 , -0.5 , 1.0 ] ^\top $
	Alpha sub X sub 1 intersection alpha sub Y sub 1 equals empty set.	$ \alpha_ { X_1 } \cap \alpha_ { Y_1 } =\emptyset $
	Alpha sub x superscript f equals mu alpha sub z superscript f.	$ \alpha_ { x } ^ { f } =\mu\alpha_ { z } ^ { f } $
	Alpha sub z of rho equals exponential of negative i z times t sub ret of rho.	$ \alpha_z ( \rho ) = \exp ( - i z t_ { ret } ( \rho ) ) $
	Alpha tau is less than or equal to one over C sub zero is less than or equal to one over four.	$ \alpha\tau \leq \frac { 1 } { C_0 } \leq \frac { 1 } { 4 } $
	Alpha tilde squared equals one minus P of x squared star.	$ \tilde { \alpha } ^ { ( 2 ) } =1-\mathbb { P } ( x^ { ( 2 ) } _ * ) $
	Alpha times lambda sub i to the power of one plus v, divided by alpha minus the quantity one plus v.	$ \frac { \alpha \lambda_i^ { 1+v } } { \alpha - ( 1+v ) } $
	Alpha times the quantity c times i plus d times j is equivalent to c times alpha of i plus d times alpha of j.	$ \alpha ( ci+dj ) \equiv c\alpha ( i ) + d\alpha ( j ) $
	Alpha, alpha dagger, equals beta, beta dagger, equals one sub F.	$ [ \alpha , \alpha^\dag ] = [ \beta , \beta^\dag ] = 1_ { \mathcal { F } } $
	Alpha, beta in the set of sigma sub 1, ellipsis, sigma sub l, tau sub 1, ellipsis, tau sub m.	$ \alpha , \beta\in\ { \sigma_1 , ... , \sigma_l , \tau_1 , ... , \tau_m\ } $
	Alpha, beta, Gamma equals open parenthesis 2.2, 0.4, 0.2 close parenthesis.	$ ( \alpha , \ , \beta , \ , \Gamma ) = ( 2.2 , \ , 0.4 , \,0.2 ) $
	Alpha, beta, gamma, delta, equals, r sub b, c, 1, r sub a.	$ ( \alpha , \beta , \gamma , \delta ) = ( cr_b , c , 1 , r_a ) $
	Alpha, colon, angle bracket n, angle bracket, right arrow, angle bracket m, angle bracket.	$ \alpha \colon \langle n \rangle \to \langle m \rangle $
	Alpha, comma, beta, belong to the interval open from zero to pi divided by two.	$ \alpha , \ , \beta\in ( 0 , \frac { \pi } { 2 } ) $
	Alpha, tilde beta, equals zero point zero four four, three times ten to the power of four.	$ ( \alpha , \tilde\beta ) = ( 0.048 , 3\cdot 10^4 ) $
	Alpha, V prime sub bullet, right arrow, V sub bullet.	$ \alpha : V ' _ { \bullet } \rightarrow V_ { \bullet } $
	Angle a hat dagger a hat, proportional to N.	$ \langle\hat { a } ^\dag\hat { a } \rangle\propto N $
	Angle A, colon, angle Gamma, right arrow, GPD.	$ \langle A \rangle : \langle \Gamma \rangle \rightarrow GPD $
	Angle A, E sub 1, ellipsis, E sub ell, angle bracket	$ \langle \mathcal { A } , E_1 , \ldots , E_ { \ell } \rangle $
	Angle ADF equals angle ADH minus angle FDC, less than pi over 2 minus alpha minus pi over 3.	$ \angle ADF=\angle ADH-\angle FDC < \pi/2-\alpha-\pi/3 $
	Angle B squared, angle bracket, Q raised to the power of g equals 3.	$ \langle \mathcal { B } ^ { 2 } \rangle_Q^ { g=3 } $
	Angle B squared, raised to the power of g, equals 3, sub Q.	$ \langle \mathcal { B } ^ { 2 } \rangle^ { g=3 } _Q $
	Angle B, intersection, union, blackboard 0, blackboard 1, not angle	$ \langle B , \cap , \cup , \mathbb { 0 } , \mathbb { 1 } , \neg\rangle $
	Angle bracket 1, r tau angle bracket is a subset of angle bracket 1, tau angle bracket.	$ \langle 1 , r\tau\rangle\subset\langle 1 , \tau\rangle $
	Angle bracket A x raised to the power of W minus b, lambda raised to the power of star angle bracket equals zero.	$ \langle Ax^ { W } -b , \lambda^ { * } \rangle=0 $
	Angle bracket d q caret i comma partial divided by partial q caret j angle bracket equals delta caret i j.	$ < dq^ { i } , \partial/\partial q^ { j } > =\delta^ { ij } $
	Angle bracket D sub 1, D prime sub 1, dot dot dot, D sub n minus 1, D prime sub n minus 1, D sub n, angle bracket	$ \langle D_1 , D'_1 , \dots , D_ { n-1 } , D ' _ { n-1 } , D_n\rangle $
	Angle bracket delta dot nu open parenthesis t close parenthesis squared angle bracket	$ \langle \delta \dot { \nu } ( t ) ^ { 2 } \rangle $
	Angle bracket epsilon of y, epsilon of 0, angle bracket equals one over absolute value of y.	$ \langle \epsilon ( y ) \epsilon ( 0 ) \rangle = 1/|y| $
	Angle bracket epsilon sub n epsilon sub m angle bracket	$ \langle \epsilon_ { \vec { n } } \epsilon_ { \vec { m } } \rangle $
	Angle bracket f, pipe V superscript 2, subscript b dagger b, pipe i angle bracket	$ \langle f| V^ { ( 2 ) } \ , _ { b^\dagger b } |i \rangle $
	Angle bracket f, T open parenthesis x, y, h, dot, dot close parenthesis angle bracket.	$ \langle f , T ( x , y , h , \cdot , \cdot ) \rangle $
	Angle bracket G of sigma union P set minus x sub i angle bracket is not an element of capital sigma sub X.	$ \langle G ( \sigma ) \cup P \setminus \ { x_i\ } \rangle \notin \Sigma_X $
	Angle bracket G star, u subscript n, angle bracket, L squared of the interval from 0 to T.	$ \langle G^\star , \mathfrak { u } _n \rangle_ { L^2 ( [ 0 , T ] ) } $
	Angle bracket g, comma h, equals, fraction, q of g plus h, divided by, q of g, q of h.	$ \langle g , h\rangle=\frac { q ( g+h ) } { q ( g ) q ( h ) } $
	Angle bracket gamma, comma h, equals, norm of h, subscript B open parenthesis V close parenthesis, equals 1.	$ \langle \gamma , h \rangle = \| h \|_ { \mathcal { B } ( V ) } =1 $
	Angle bracket H, approximately equal to v equals mu sub h divided by the square root of lambda.	$ \langle H\rangle \approx v = \mu_h/\sqrt { \lambda } $
	Angle bracket H, comma, G, angle bracket equals angle bracket F perpendicular H, comma, G, angle bracket.	$ \langle H , FG \rangle = \langle F^ { \perp } H , G\rangle $
	Angle bracket I, similar to V to the power of 2 Delta minus 1, equals V to the power of 41.	$ \langle I \rangle\sim V^ { 2\Delta-1 } =V^ { 41 } $
	Angle bracket J sub k sub 1 superscript pi vertical bar J sub k sub 2 superscript pi angle bracket	$ \langle J_ { k_1 } ^ { \pi } |J_ { k_2 } ^ { \pi } \rangle $
	Angle bracket j sub mu superscript c psi psi dagger angle bracket	$ \langle j_ { \mu } ^ { c } \psi\psi^ { \dag } \rangle $
	Angle bracket k raised to the power of 2 equals the sum over i of k sub i raised to the power of 2 divided by N.	$ \langle k^ { ( 2 ) } \rangle=\sum_ik_i^ { ( 2 ) } /N $
	Angle bracket lambda plus theta sub 2 vee plus tilde beta vee comma theta sub 1 angle bracket is less than zero.	$ \langle \lambda+\theta_2^\vee+\tilde\beta^\vee , \theta_1\rangle < 0 $
	Angle bracket lambda prime, mu prime, vertical bar lambda, mu, angle bracket sub 2.	$ \langle \lambda ' , \mu ' \mid \lambda , \mu\rangle_2 $
	Angle bracket lambda sub t, tilde a sub t minus s sub t, angle bracket, x sub t star.	$ \langle \lambda_t , \tilde { a } _t -s_t \rangle x_t^ * $
	Angle bracket log n sub e end angle bracket equals 10.06 sub negative 0.06 superscript positive 0.05	$ \langle \log n_e \rangle = 10.06_ { -0.06 } ^ { +0.05 } $
	Angle bracket n sub II end angle bracket divided by angle bracket n sub I end angle bracket equals 2.	$ \langle n_ { \text { II } } \rangle/ \langle n_ { \text { I } } \rangle = 2 $
	Angle bracket n sub p V F sub o angle bracket, E sub o.	$ \langle n_p V { \cal F } _o \rangle \ , ( E_o ) $
	Angle bracket nu minus mu, comma, psi, angle bracket equals angle bracket nu minus mu, comma, psi, angle bracket.	$ \langle \nu-\mu , \psi \rangle= \langle \nu- \mu , \Psi \rangle $
	Angle bracket p sub 1 dot psi sub 1 p sub 1 dot psi bar sub 1 angle bracket	$ \langle p_1\cdot \psi_1 p_1\cdot \bar { \psi } _1\rangle $
	Angle bracket q prime angle bracket equals the sum from i equals 0 to ell of angle bracket q sub i angle bracket	$ \langle q ' \rangle = \sum _ { i = 0 } ^ { \ell } \langle q_i \rangle $
	Angle bracket q sub 2 equals C square root of T divided by c, absolute value of angle bracket xi.	$ \langle q_2\rangle= C\sqrt { T/c } \ , |\langle\xi\rangle| $
	Angle bracket r sub i, end angle bracket, sub i in V, angle bracket Z sub i, end angle bracket, sub i in V.	$ \langle r_i \rangle _ { i \in V } \langle Z_i \rangle _ { i \in V } $
	Angle bracket S, A, T, R, Omega, O, gamma, angle bracket	$ \langle S , A , T , R , \Omega , O , \gamma\rangle $
	Angle bracket T x comma x angle bracket greater than or equal to M angle bracket x comma x angle bracket.	$ \langle Tx , x\rangle \geq M \langle x , x\rangle $
	Angle bracket u sub x prime squared angle bracket sub x comma t to the power of one-half.	$ \langle u_x^ { \prime 2 } \rangle_ { x , t } ^ { 1/2 } $
	Angle bracket V of t end angle bracket equals open parenthesis two-thirds h f sub A C divided by two e	$ \langle V ( t ) \rangle = ( 2/3 ) h f_ { _ { AC } } /2e $
	Angle bracket x comma y end angle bracket sub C equals x overline y.	$ \langle x , y\rangle_ { \mathbb { C } } = x\overline { y } $
	Angle bracket x open parenthesis t close parenthesis squared close angle bracket similar to D delta t delta	$ \langle x ( t ) ^2\rangle\sim D_\delta t^\delta $
	Angle bracket x plus, vertical bar, hat rho open parenthesis t close parenthesis, vertical bar, x minus angle bracket	$ \langle x^+ | \hat { \rho } ( t ) | x^- \rangle $
	Angle bracket x sub i, colon i in omega, angle bracket, belongs to capital X omega.	$ \langle x_i : i \in \omega \rangle \in X^\omega $
	Angle bracket x tilde sub i x tilde sub j angle bracket equals C sub i j.	$ \langle \tilde x_i\tilde x_j\rangle = C_ { ij } $
	Angle bracket y comma x greater than or equal to the maximum of angle bracket y comma c colon c in capital C	$ \langle y , x \rangle \geq \max \ { \langle y , c \rangle : c \in C\ } $
	Angle bracket, delta subscript kappa, vertical bar, kappa, in, script K, angle bracket.	$ \langle \delta_ { \kappa } \mid \kappa \in \mathcal { K } \rangle $
	Angle bracket, dot, comma, dot, angle bracket, subscript A	$ \langle \cdot , \cdot\rangle_ { \mathcal { A } } $
	Angle bracket, dot, comma, dot, angle bracket, subscript, tilde, mathcal, H.	$ \langle \cdot , \cdot \rangle_ { \tilde { \mathcal { H } } } $
	Angle bracket, dot, comma, dot, angle bracket, subscript, X star, comma, X.	$ \langle\cdot , \cdot\rangle_ { \mathcal { X } ^ * , \mathcal { X } } $
	Angle bracket, dot, dot, dot, angle bracket, subscript, Z T, comma, i, superscript, ell.	$ \langle \cdot , \cdot \rangle_ { \text { TZ } , i } ^ { \text { ell } } $
	Angle bracket, fraction one over four, fraction one over four, fraction one over four, angle bracket	$ \langle \frac { 1 } { 4 } \frac { 1 } { 4 } \frac { 1 } { 4 } \rangle $
	Angle bracket, gamma of u sub i, comma, phi of r, comma, gamma of u sub j, angle bracket.	$ < \gamma ( u_i ) , \phi ( r ) , \gamma ( u_j ) > $
	Angle bracket, h-bar squared dot S sub q z dot S sub negative q z, angle bracket, sub zero.	$ \langle\hbar^2 \dot { S } _q^z\dot { S } _ { -q } ^z\rangle_0 $
	Angle bracket, partial derivative with respect to lambda, phi lambda, comma, kappa lambda, angle bracket.	$ \langle\partial_ { \lambda } \phi_ { \lambda } , \kappa_ { \lambda } \rangle $
	Angle bracket, rho sub mon, angle bracket equals angle bracket, rho sub pairs, angle bracket equals zero.	$ \langle\rho_ { mon } \rangle=\langle\rho_ { pairs } \rangle=0 $
	Angle bracket, sigma sub R, open parenthesis, p to H to 4l, close parenthesis, angle bracket, similar to 0.23.	$ \langle\sigma_R ( pp\to H \to 4l ) \rangle \sim 0.23 $
	Angle bracket, summation, i, a sub i, hat P sub i, comma, hat P sub j, angle bracket, greater than zero.	$ \langle \sum_i a_i \widehat P_i , \widehat P_j\rangle > 0 $
	Angle bracket, the partial derivative of vector nu with respect to time, comma, vector nu, angle bracket, equals zero.	$ \ < \frac { \partial \vec { \nu } } { \partial t } , \vec { \nu } \ > =0 $
	Angle bracket, vector phi of x, vector phi of 0, angle bracket.	$ \langle \vec { \phi } ( x ) \vec { \phi } ( 0 ) \rangle $
	Angle bracket, widetilde, x squared, open parenthesis, epsilon, close parenthesis, angle bracket.	$ \langle\widetilde { \symbol { x } ^ { 2 } } ( \epsilon ) \rangle $
	Angle bracket, xi sub t, xi sub s, angle bracket, equals, kappa, delta open parenthesis, t minus s, close parenthesis.	$ \langle \xi_t\xi_ { s } \rangle=\kappa\delta ( t-s ) $
	Angle G intersection angle H	$ \langle \mathcal { G } \rangle \cap \langle \mathcal { H } \rangle $
	Angle gamma to the power of n sub 3, angle sub Q, equals zero.	$ \langle \gamma^ { n } _ { 3 } \rangle_ { Q } =0 $
	Angle hat G union m prime angle	$ \langle \hat { \mathcal { G } } \cup \ { m'\ } \rangle $
	Angle O sub alpha, angle T prime	$ \langle \mathcal { O } _ { \alpha } \rangle_ { \text { T ' } } $
	Angle R equals e to the power of the angle phi divided by 2 times M sub 4, times R sub 0.	$ \langle R\rangle=e^ { \frac { \langle\phi\rangle } { 2M_4 } } R_0 $
	Angle T superscript s t subscript i angle subscript H not equal to zero.	$ \langle T^ { st } _i \rangle_ { \mathcal { H } } \neq 0 $
	Angle V sub H of 0 equals angle K of 0 equals 4.5.	$ \langle V_H \rangle ( 0 ) = \langle K \rangle ( 0 ) = 4.5 $
	Angle v sub j superscript g, v sub j prime superscript g, equals zero.	$ \langle v_j^ { ( g ) } , v_ { j ' } ^ { ( g ) } \rangle = 0 $
	Approximate equals d to the power of d minus 1, ell vector sub i divided by 2 E sub i.	$ \approx d^ { d-1 } \vec { \ell } _i / ( 2 E_i ) $
	Arcsine of the fraction two Delta divided by D, multiplied by the difference between ell one and ell two, equals alpha.	$ \arcsin { \frac { 2\Delta } { D ( \ell_1 , \ell_2 ) } } = \alpha $
	arctan of G, bar v a equals arctan of H, bar w b.	$ atp ( G , \bar { v } a ) = atp ( H , \bar { w } b ) $
	arg of lambda is not equal to arg of lambda	$ \arg ( \overline { \lambda } ) \neq \arg ( \lambda ) $
	Atten in R to the power of l plus o maps to R to the power of 1.	$ Atten \in \mathbb { R } ^ { l + o } \rightarrow \mathbb { R } ^1 $
	b belongs to L one loc of R to the power of n, R to the power of n.	$ b \in L^ { 1 } _ { loc } ( \mathbb { R } ^n , \mathbb { R } ^n ) $
	b equals b raised to the power of o, belonging to the set of real numbers raised to the power of c sub out.	$ b= ( b^ { o } ) \in\mathbb { R } ^ { c_ { \text { out } } } $
	b equals big O of absolute value of logarithm of gamma subscript n comma epsilon equals big O of logarithm of n.	$ b = O ( |\log [ \Gamma_ { n , \varepsilon } ] | ) = O ( \log [ n ] ) $
	b equals big O of the square root of ell divided by d log ell.	$ b = O ( \frac { \ell^ { 1/2 } } { d\log \ell } ) $
	b equals mu to the power of min, open parenthesis, T sub Z over B, close parenthesis, restricted to C.	$ b = \mu^ { min } ( T_ { \mathcal { Z } /B } |_ { C } ) $
	B equals tau hat sub y ell hat divided by mu hat V.	$ B=\hat { \tau } _y \hat { \ell } / \hat { \mu } \hat { V } $
	b equals the fraction with numerator phi minus 1 and denominator 1 minus phi times the exponential of negative eta.	$ b = \frac { \phi -1 } { 1- \phi \exp\ { -\eta\ } } $
	b equals the fraction with numerator x sub 3t plus 1 plus x sub 3t plus 2 plus x sub 3t plus 3 and denominator 3.	$ b=\frac { x_ { 3t+1 } +x_ { 3t+2 } +x_ { 3t+3 } } { 3 } $
	B equals the matrix with elements b sub i j, where i ranges from 1 to n and j ranges from 1 to m.	$ B= [ b_ { ij } ] _ { 1 \leq i \leq n , 1 \leq j \leq m } $
	B equals zero GeV squared, mu equals zero GeV, T equals zero GeV.	$ B=0\ , \text { GeV } ^2 , \mu=0 \ , \text { GeV } , T=0.6\ , \text { GeV } $
	B goes to K bar star goes to K bar pi bar ell.	$ B \to \bar { K } ^ * ( \to \bar { K } \pi ) \bar { \ell } \ell $
	B goes to K sub 1 open parenthesis 1270, 1400 close parenthesis gamma.	$ B\to \left ( K_ { 1 } ( 1270,1400 ) \right ) \gamma $
	B in parentheses, Omega of N, tilde Omega of N, Omega of N.	$ B ( \Omega ( N ) , \widetilde { \Omega } ( N ) , \Omega ( N ) ) $
	b is a function from the set of real numbers squared to the set of real numbers raised to the power of 6.	$ b : \mathbb { R } ^2\rightarrow\mathbb { R } ^6 $
	B is a subset of V finite implies the set of real numbers raised to the power of V.	$ \ { B \subset V \text { finite } \ } \to \mathbb { R } ^V $
	B is equal to the set of all B degrees such that B is bounded in X with respect to tau.	$ \mathcal { B } =\ { B^\circ : B ~\text { is bounded in } ~ ( X , \tau ) \ } $
	b is equivalent to one-half times the quantity t minus tau.	$ b \equiv \dfrac { 1 } { 2 \left ( t - \tau \right ) } $
	B of A subscript r of x, comma, kappa r, subset of B of x, comma, r, intersection D.	$ B ( A_r ( x ) , \kappa r ) \subseteq B ( x , r ) \cap D $
	b of H equals b of G plus b of H overline X equals b of G	$ b ( H ) =b ( G ) +b ( H/\overline { X } ) =b ( G ) $
	b of lambda equals the set of ell sub b of 1, ellipsis, ell sub b of m.	$ b ( \lambda ) =\ { \ell_ { b ( 1 ) } , \dots , \ell_ { b ( m ) } \ } $
	b of phi m nabla xi m goes to b of phi nabla q	$ b ( \phi_m ) \nabla \xi_m\to b ( \phi ) \nabla q $
	B of r equals l of r to the power of negative one over alpha sub nt plus three.	$ B ( r ) = l ( r ) ^\frac { -1 } { \alpha_ { nt } +3 } $
	b of r equals negative 2 natural logarithm of open parenthesis 1 minus fraction 2 M over r close parenthesis.	$ b ( r ) =-2\ln\left ( 1-\frac { 2 M } { r } \right ) $
	B of R to the power of d	$ \mathcal { B } \left ( \mathbb { R } ^ { d } \right ) $
	b of t, x equals negative alpha of t, x plus nabla beta of t, x.	$ b ( t , x ) = - ( \alpha ( t , x ) + \nabla \beta ( t , x ) ) $
	B of u, r equals the set of x in the real numbers to the power of m such that delta of u, x is less than r.	$ B ( u , r ) = \ { x \in \mathbb { R } ^m : \delta ( u , x ) < r\ } $
	B of y, 4 epsilon absolute value of y equals B of 0 to the power of n, 4 epsilon absolute value of y.	$ B ( y,4\epsilon|y| ) =B ( 0^ { n } ,4\epsilon|y| ) $
	B one equals B two equals dot dot dot equals B N equals B	$ \mathcal { B } _1=\mathcal { B } _2=\cdots=\mathcal { B } _N=\mathcal { B } $
	B open parenthesis, v prime, close parenthesis, is a subset of B open parenthesis, v prime, close parenthesis.	$ B ( \mathit { nextM } ( v ' ) ) \subseteq B ( v ' ) $
	b prime equals a to the power of one divided by one plus one minus sigma zero times tau bar.	$ b'=a^ { \frac { 1 } { 1+ ( 1-\sigma_0 ) \bar { \tau } } } $
	B raised to the power of circle x is equivalent to the limit as beta approaches infinity of B of x.	$ B^\circ ( x ) \equiv \lim_ { \beta\rightarrow\infty } B ( x ) $
	B raised to the power of t sub j, where t ranges from 1 to T, and j ranges from 1 to N raised to the power of t.	$ \ { \ { B^t_j\ } _ { t=1 } ^ { T } \ } _ { j=1 } ^ { N^t } $
	B raised to the power of tilde pi sub mu sub mu.	$ \mathcal { B } ^ { \widetilde { \pi } _ { \mu } } _ { \mu } $
	B squared sub Delta w, open parenthesis, tau plus, close parenthesis.	$ \mathcal { B } ^2_ { \Delta w } ( \tau^ { + } ) $
	B sub 1 is isomorphic to the closure of B sub 2, D sub 1 is isomorphic to the closure of D sub 2.	$ B_1 \cong \overline { B } _2 , D_1 \cong \overline { D } _2 $
	b sub 1 x sub 1 plus b sub 2 x sub 2 plus b sub 3 x sub 3	$ b_ { 1 } x_ { 1 } + b_ { 2 } x_ { 2 } + b_ { 3 } x_ { 3 } $
	b sub 1, b sub 2, b sub 3 equals open parenthesis r z, r divided by z, r to the power of negative 2 close parenthesis.	$ ( b_1 , b_2 , b_3 ) = ( r z , r / z , r^ { -2 } ) $
	b sub 2 belongs to the open interval from 0 to b sub 1, excluding c sub j, where j ranges from 1 to q sub 0.	$ b_2\in ( 0 , b_1 ) \backslash \ { c_j\ } _ { 1\leq j\leq q_0 } $
	B sub 2 equals B sub 20 open parenthesis phi close parenthesis plus B sub 22 raised to C cosine 2 chi.	$ B_2=B_ { 20 } ( \varphi ) +B_ { 22 } ^C \cos 2\chi $
	B sub 2 set minus Omega sub 2 subset equal to Omega sub 1 intersection B sub 1	$ B_2 \setminus \Omega_2 \subseteq \Omega_1 \cap B_1 $
	B sub 3 superscript 1 subset E sub 7 superscript 1	$ B_ { 3 } ^ { ( 1 ) } \subset E_ { 7 } ^ { ( 1 ) } $
	B sub alpha equals the set of n comma m such that m is less than or equal to f sub alpha of n.	$ B_\alpha=\ { ( n , m ) \mid m\leq f_\alpha ( n ) \ } $
	B sub bar 3 B sub bar 3, B sub 6 B sub 6.	$ \mathscr { L } _ { B_ { \bar { 3 } } B_ { \bar { 3 } } , B_6B_6 } $
	B sub beta equals the set of eta in B star sub 0 such that c of beta comma eta equals j equals I plus.	$ B_\beta=\ { \eta\in B^ * _0 : c ( \beta , \eta ) =j\ } \in I^+ $
	B sub d equals pi sub 1 of the Conf sub d of C.	$ B_d = \pi_1\left ( \text { Conf } _d\left ( \mathbb { C } \right ) \right ) $
	B sub d of x, open parenthesis, x, close parenthesis, intersect U sub R sub 0 divided by 2.	$ B_ { d ( x ) } ( x ) \cap U_ { \frac { R_0 } { 2 } } $
	B sub delta of y of y is a subset of B sub delta of x of x.	$ B_ { \delta ( y ) } ( y ) \subset B_ { \delta ( x ) } ( x ) $
	B sub dot minus integral from 0 to theta raised to the power of N, n, sub u of j raised to the power of N sub n, du.	$ B_\cdot - \int_0^\cdot \theta^ { N , n } _u ( j^N_n ) du $
	b sub i equals the list containing b sub i sub l, where l ranges from 1 to L sub i.	$ b_i = [ b_ { i\ell } , \ell = 1 , \ldots , L_i ] $
	B sub i is less than B prime sub i equals B sub i plus 1 is less than B sub i plus 2 equals B prime sub i plus 1.	$ B_i < B'_i=B_ { i+1 } < B_ { i+2 } =B ' _ { i+1 } $
	b sub i j open parenthesis p comma v close parenthesis	$ b_ { ij } ( \symbol { p } , \symbol { v } ) $
	B sub i plus D sub i equals B tilde sub i plus D tilde sub i.	$ B_i + D_i = \widetilde { B } _i + \widetilde { D } _i $
	B sub i sub 1 intersection dot dot dot intersection B sub i sub M is not equal to empty set.	$ B_ { i_1 } \cap \cdots \cap B_ { i_M } \neq \emptyset $
	B sub i, conditioned on s sub i superscript k and a sub i superscript k, where i ranges from 1 to h.	$ B_i ( \cdot\vert s_i^k , a_i^k ) , i=1 , \cdots , h $
	B sub j star intersection F sub j star equals empty set	$ B_ { j^ { \star } } \cap F_ { j^ { \star } } = \emptyset $
	b sub j, superscript k, equals b bar, superscript j, for all k.	$ b_ { [ j ] } ^ { ( k ) } = \bar { b } ^ { ( j ) } \forall k $
	b sub l sub tau k comma open parenthesis d plus 1 close parenthesis equals theta sub l sub tau k.	$ b_ { l_ { \tau_k } , ( d+1 ) } = \theta_ { l_ { \tau_k } } $
	B sub lambda mu, lambda, mu equals one, dot dot dot, r.	$ B_ { \lambda \mu } , \lambda , \mu=1 , \ldots , r $
	b sub m sub k plus 1 belongs to the set of a sub 1, a sub 2, dot dot dot, a sub n minus 1.	$ b_ { m_k } + 1 \in \ { a_1 , a_2 , \cdots , a_ { n-1 } \ } $
	B sub n equals B hat sub n open parenthesis p sub n comma xi mid z close parenthesis.	$ B_n = \widehat { B } _n ( p_n , \xi \mid \symbol { z } ) $
	b sub n equals b sub 0 plus m pi n divided by 4 W times 2 m pi n divided by nu sub T.	$ b_n=b_0+\frac { m\pi n } { 4W ( 2m\pi n/\nu_T ) } $
	B sub N to the power of lambda is a subset of L lambda.	$ B_N^ { ( \lambda ) } \subseteq \mathcal { L } ( \lambda ) $
	B sub QQ, open parenthesis, one-half superscript plus, close parenthesis.	$ \mathcal { B } _ { QQ } ( \frac { 1 } { 2 } ^+ ) $
	B sub rho is defined as B of x sub 0 comma rho.	$ B_ { \rho } \equiv B\left ( x_ { 0 } , \rho\right ) $
	B sub s equals the set of v in L squared T squared such that alpha J of v, s is less than or equal to 1.	$ B_s = \ { v \in L^2 ( T^2 ) : \alpha J ( v , s ) \leq 1\ } $
	b sub s to the power of k equals zero, for all k in the set K excluding k prime.	$ b_s^k=0 , \forall k \in \mathcal { K } \setminus \ { k'\ } $
	B sub t equals negative one-fourth y squared e to the power of 2G.	$ B_ { t } =-\frac { 1 } { 4 } y^ { 2 } e^ { 2G } $
	B sub T equals the angle bracket B angle bracket sub rho i.	$ B_T=\langle\mathcal { B } \rangle_ { \rho_i } . $
	b sub v superscript negative of x equals negative angle bracket x comma v angle bracket	$ b_ { v } ^ { - } ( x ) = - \langle x , v \rangle $
	B sub X star equals the set of all f in X star such that the norm of f, sub op, is less than or equal to 1.	$ B_ { X^ * } = \ { f\in X^ * : \parallel f\parallel_ { op } \leq 1\ } $
	b subscript chi sub 1, pi subscript chi sub 1 equals b subscript chi sub 2, pi subscript chi sub 2.	$ ( b_ { \chi_1 } , \pi_ { \chi_1 } ) = ( b_ { \chi_2 } , \pi_ { \chi_2 } ) $
	b tilde epsilon of x equals x plus alpha epsilon plus r epsilon of x.	$ \tilde b_\epsilon ( x ) = x + \alpha ( \epsilon ) + r_\epsilon ( x ) $
	B tilde u is a subset of B u union e.	$ B ( \tilde { u } ) \subseteq B ( u ) \sqcup\ { e\ } $
	B to K star nu nu-bar.	$ B\to { K } ^ { \left ( \ast \right ) } \nu \overline { \nu } $
	b to the power of j sub tau, n, l, tilde b to the power of j sub tau, n.	$ b^j_ { \tau , n , l } , \tilde { b } ^j_ { \tau , n } $
	B to the power of l sub 2 of x equals sine of l phi x divided by square root of pi.	$ B^l_2 ( x ) =\sin ( l\varphi_x ) /\sqrt { \pi } $
	b to the power of L, sub s squared, equals b to the power of L, sub nabla squared, equals zero.	$ b^ { L } _ { s^ { 2 } } =b^ { L } _ { \nabla^ { 2 } } =0 $
	B to the power of los, open parenthesis x, C obs, G to the power of los, close parenthesis.	$ B^ { los } ( x , \mathcal { C } _\text { obs } , \mathcal { G } ^ { los } ) $
	b, open interval 0, positive infinity, close interval, right arrow, open interval 0, positive infinity.	$ b : \left [ 0 , +\infty \right [ \rightarrow \left [ 0 , +\infty \right [ $
	B, open parenthesis, y sub i star, comma, 2 R sub 0, close parenthesis, subscript i belongs to I star.	$ \ { B ( y_i^\star,2R_0 ) \ } _ { i\in I^\star } $
	Bar A, open parenthesis, a sub 0, comma, e sub 0, close parenthesis.	$ \bar { A } \left ( \aa_ { 0 } , e_ { 0 } \right ) $
	Bar alpha sub i plus one-half to the power of y, bar alpha sub i plus one-half to the power of q, B sub i, d sub i k.	$ { \bar \alpha } _ { i+1/2 } ^y , \bar \alpha_ { i+1/2 } ^q , B_i , d_ { ik } $
	Bar alpha sub n is defined as the product from s equals 1 to n of alpha sub s.	$ \bar { \alpha } _ { n } : =\prod_ { s=1 } ^ { n } \alpha_ { s } $
	Bar alpha to the power of k equals open parenthesis a sub k plus 1, dot dot dot, alpha sub M close parenthesis.	$ \bar { \alpha } ^k = \left ( a_ { k+1 } , \dots , \alpha_ { M } \right ) $
	Bar B goes to J psi l minus bar nu l.	$ \overline { B } \to J/\psi l^- \overline { \nu } _l $
	Bar B sub d to bar K superscript 0 K superscript star 0	$ { \bar B } _d \to \bar { K } ^ { 0 } { K } ^ { * 0 } $
	Bar B to the power of 0 goes to D star plus pi minus pi plus pi minus.	$ \overline { B } ^0 \to D^ { * + } \pi^- \pi^+ \pi^- $
	Bar D sub plus Phi equals zero equals bar D sub minus Phi.	$ \overline { D } _+\Phi=0=\overline { D } _-\Phi $
	Bar d, open parenthesis, hat phi prime of o sub i, comma, hat phi prime of o sub j, close parenthesis.	$ \bar { d } ( \hat { \phi } ' ( o_i ) , \hat { \phi } ' ( o_j ) ) $
	Bar f equals delta bar phi divided by the sum over i of delta phi i divided by f i.	$ \bar f=\delta\bar\phi/\sum_i ( \delta\phi_i/f_i ) $
	Bar f equals the sum over alpha, alpha sub i greater than or equal to m, of lambda sub alpha x to the power of alpha.	$ \bar f = \sum_ { \alpha , \alpha_i \geq m } \lambda_\alpha x^\alpha $
	Bar G belongs to the set of G, sub J.	$ \bar { \mathcal { G } } \in [ \mathcal { G } ] _\mathcal { J } $
	Bar g of y is less than or equal to C sub 1 times the quantity 1 over h raised to the power of D minus epsilon.	$ \bar { g } ( y ) \leq C_1 ( \frac { 1 } { h } ) ^ { D-\varepsilon } $
	Bar Gamma sub n n superscript mu equals bar Gamma sub mu n superscript n equals zero.	$ \bar { \Gamma } _ { nn } ^ { \mu } =\bar { \Gamma } _ { \mu n } ^ { n } =0 $
	Bar gamma sub T sub n equals Delta sub 1 bar gamma.	$ \bar { \gamma } _ { \text { T } _n } =\Delta_1\bar { \gamma } $
	Bar H sub i comma t, bar q sub less than or equal to t.	$ ( \bar { H } _ { i , t } , \bar { q } _ { \leq t } ) $
	Bar I equals bar I open parenthesis infinity, r sub 1, r sub max close parenthesis.	$ \bar { I } = \bar { I } ( \infty , r_ { 1 } , r_ { max } ) $
	Bar Lambda is greater than or equal to open parenthesis one plus epsilon close parenthesis Lambda.	$ \bar { \Lambda } \geq ( 1+\varepsilon ) \Lambda $
	Bar mu raised to j of Q equals the integral over v comma 1 of bar mu raised to j minus 1 of Q, d mu.	$ \bar { \mu } ^j ( Q ) =\int_ { ( v,1 ] } \bar { \mu } ^ { j-1 } ( Q ) d\mu $
	Bar mu, open parenthesis, bar epsilon, close parenthesis, equals one.	$ \bar { \mu } \left ( \bar { \varepsilon } \right ) =1 $
	Bar n plus equals bar n minus gamma zero, equivalent to n zero.	$ \bar { n } _+ = \bar { n } _- \gamma_0 \equiv n_0 $
	Bar n to the power of mu goes to bar n to the power of mu minus epsilon sub perpendicular to the power of mu.	$ \bar { n } ^\mu \rightarrow \bar { n } ^\mu -\epsilon_\perp ^\mu $
	Bar P is a subset of bar N, belonging to script X sub script V.	$ \bar { P } \sqsubseteq \bar { N } \in { \cal X } _ { \cal V } $
	Bar P sub A superscript X	$ \bar { \mathcal { P } } _\mathcal { A } ^ { [ \mathcal { X } ] } $
	Bar Phi dagger sub n z, bar Phi sub n z.	$ \bar { \Phi } ^ { \dagger } _n ( z ) , \bar { \Phi } _n ( z ) $
	Bar phi sub alpha equals the angle bracket phi sub alpha angle bracket.	$ \bar { \phi } _\alpha = \langle\phi_\alpha\rangle $
	Bar psi sub 1 psi sub 2, open parenthesis, bar psi sub 3 psi sub 3, close parenthesis.	$ \bar { \psi } _1\psi_2 ( \bar { \psi } _3\psi_3 ) $
	Bar q of mu raised to the power of a star is greater than bar q of mu raised to the power of a.	$ \bar { q } ( \mu^ { ( a ) * } ) > \bar { q } ( \mu^ { ( a ) } ) $
	Bar q sub syn plus or minus t sub 0.975, M minus 1 square root of T sub r	$ \bar { q } _ { syn } \pm t_ { 0.975 , M-1 } \sqrt { T_r } $
	Bar sigma equals the set containing 1 through N minus sigma.	$ \bar\sigma = \ { 1 , \ldots , N\ } \setminus\sigma $
	Bar sigma open parenthesis the sum E close parenthesis equals bar sigma open parenthesis the sum F close parenthesis.	$ \bar \sigma ( \sum E ) = \bar \sigma ( \sum F ) $
	Bar T is defined as equal to k sub B T divided by h-bar omega sub m.	$ \bar { T } \equiv \frac { k_B T } { \hbar \omega_m } $
	Bar t of hat theta is less than bar theta.	$ \bar { t } ( \hat { \theta } ) < \bar { \theta } $
	Bar u equals the inner product of u with alpha such that alpha is less than gamma.	$ \bar { u } =\langle u_\alpha : \alpha < \gamma \rangle $
	Bar v of z equals V sub L of z, semicolon z sub 0, comma v sub 0.	$ \bar { v } ( z ) =\mathcal { V } _L ( z ; z_0 , v_0 ) $
	Bar v, bar w, equals, bar x in T H.	$ [ \bar { v } , \bar { w } ] = : \bar { x } \in T \mathcal { H } $
	Bar x equals the angle bracket x sub alpha colon alpha less than kappa angle bracket	$ \bar { x } =\langle x_\alpha : \alpha < \kappa\rangle $
[truncated: 5,353 more rows]

## Sheet: truly_checked_new_formulas
FILENAME	INPUT:text	INPUT:text3
1	-1.01 plus minus 0.18	-1.01\pm0.18
2	( A, B, rho )	( A , B , \rho )
[truncated: 10,110 more rows]
